# Supplementary material
Source: ML conference proceedings conference paper supplement (https://proceedings.neurips.cc/paper_files/paper/2022/hash/01ecd39ca49ddecc5729ca996304781b-Abstract.html)
Supplement: Supplementary file 1 [file 01ecd39ca49ddecc5729ca996304781b-Supplemental-Conference.zip]

Archive with 148 entries (138 files):
- supplementary NEURIPS 2022/
- supplementary NEURIPS 2022/.DS_Store
- __MACOSX/supplementary NEURIPS 2022/._.DS_Store
- supplementary NEURIPS 2022/CODE_supplementary/
- __MACOSX/supplementary NEURIPS 2022/._CODE_supplementary
- supplementary NEURIPS 2022/PAPER_supplementary/
- supplementary NEURIPS 2022/CODE_supplementary/.DS_Store
- __MACOSX/supplementary NEURIPS 2022/CODE_supplementary/._.DS_Store
- supplementary NEURIPS 2022/CODE_supplementary/README.md
- __MACOSX/supplementary NEURIPS 2022/CODE_supplementary/._README.md
- supplementary NEURIPS 2022/CODE_supplementary/post_processing.py
- __MACOSX/supplementary NEURIPS 2022/CODE_supplementary/._post_processing.py
- supplementary NEURIPS 2022/CODE_supplementary/data/
- __MACOSX/supplementary NEURIPS 2022/CODE_supplementary/._data
- supplementary NEURIPS 2022/CODE_supplementary/saved_results/
- __MACOSX/supplementary NEURIPS 2022/CODE_supplementary/._saved_results
- supplementary NEURIPS 2022/CODE_supplementary/main_script.py
- __MACOSX/supplementary NEURIPS 2022/CODE_supplementary/._main_script.py
- supplementary NEURIPS 2022/CODE_supplementary/.idea/
- __MACOSX/supplementary NEURIPS 2022/CODE_supplementary/._.idea
- supplementary NEURIPS 2022/CODE_supplementary/src/
- __MACOSX/supplementary NEURIPS 2022/CODE_supplementary/._src
- supplementary NEURIPS 2022/PAPER_supplementary/Conditional_Meta_Learning_of_Linear_Representations_NeurIPS_2022.pdf
- __MACOSX/supplementary NEURIPS 2022/PAPER_supplementary/._Conditional_Meta_Learning_of_Linear_Representations_NeurIPS_2022.pdf
- supplementary NEURIPS 2022/CODE_supplementary/data/.DS_Store
- __MACOSX/supplementary NEURIPS 2022/CODE_supplementary/data/._.DS_Store
- supplementary NEURIPS 2022/CODE_supplementary/data/ml100kSparse.mat
- __MACOSX/supplementary NEURIPS 2022/CODE_supplementary/data/._ml100kSparse.mat
- supplementary NEURIPS 2022/CODE_supplementary/data/jester1Sparse.mat
- __MACOSX/supplementary NEURIPS 2022/CODE_supplementary/data/._jester1Sparse.mat
- supplementary NEURIPS 2022/CODE_supplementary/data/lenk_data.mat
- __MACOSX/supplementary NEURIPS 2022/CODE_supplementary/data/._lenk_data.mat
- supplementary NEURIPS 2022/CODE_supplementary/data/ml-100k/
- __MACOSX/supplementary NEURIPS 2022/CODE_supplementary/data/._ml-100k
- supplementary NEURIPS 2022/CODE_supplementary/saved_results/synth_6_clusters_results
- __MACOSX/supplementary NEURIPS 2022/CODE_supplementary/saved_results/._synth_6_clusters_results
- supplementary NEURIPS 2022/CODE_supplementary/saved_results/.DS_Store
- __MACOSX/supplementary NEURIPS 2022/CODE_supplementary/saved_results/._.DS_Store
- supplementary NEURIPS 2022/CODE_supplementary/saved_results/synth_2_clusters_results
- __MACOSX/supplementary NEURIPS 2022/CODE_supplementary/saved_results/._synth_2_clusters_results
- supplementary NEURIPS 2022/CODE_supplementary/saved_results/jester_results.npy
- __MACOSX/supplementary NEURIPS 2022/CODE_supplementary/saved_results/._jester_results.npy
- supplementary NEURIPS 2022/CODE_supplementary/saved_results/movies_results.npy
- __MACOSX/supplementary NEURIPS 2022/CODE_supplementary/saved_results/._movies_results.npy
- supplementary NEURIPS 2022/CODE_supplementary/saved_results/lenk_results.npy
- __MACOSX/supplementary NEURIPS 2022/CODE_supplementary/saved_results/._lenk_results.npy
- supplementary NEURIPS 2022/CODE_supplementary/.idea/inspectionProfiles/
- __MACOSX/supplementary NEURIPS 2022/CODE_supplementary/.idea/._inspectionProfiles
- supplementary NEURIPS 2022/CODE_supplementary/.idea/.gitignore
- __MACOSX/supplementary NEURIPS 2022/CODE_supplementary/.idea/._.gitignore
- supplementary NEURIPS 2022/CODE_supplementary/.idea/workspace.xml
- __MACOSX/supplementary NEURIPS 2022/CODE_supplementary/.idea/._workspace.xml
- supplementary NEURIPS 2022/CODE_supplementary/.idea/modules.xml
- __MACOSX/supplementary NEURIPS 2022/CODE_supplementary/.idea/._modules.xml
- supplementary NEURIPS 2022/CODE_supplementary/.idea/CODE_supplementary.iml
- __MACOSX/supplementary NEURIPS 2022/CODE_supplementary/.idea/._CODE_supplementary.iml
- supplementary NEURIPS 2022/CODE_supplementary/.idea/misc.xml
- __MACOSX/supplementary NEURIPS 2022/CODE_supplementary/.idea/._misc.xml
- supplementary NEURIPS 2022/CODE_supplementary/src/.DS_Store
- __MACOSX/supplementary NEURIPS 2022/CODE_supplementary/src/._.DS_Store
- supplementary NEURIPS 2022/CODE_supplementary/src/methods.py
- __MACOSX/supplementary NEURIPS 2022/CODE_supplementary/src/._methods.py
- supplementary NEURIPS 2022/CODE_supplementary/src/inner_algorithm_feature.py
- __MACOSX/supplementary NEURIPS 2022/CODE_supplementary/src/._inner_algorithm_feature.py
- supplementary NEURIPS 2022/CODE_supplementary/src/plotting.py
- __MACOSX/supplementary NEURIPS 2022/CODE_supplementary/src/._plotting.py
- supplementary NEURIPS 2022/CODE_supplementary/src/__init__.py
- __MACOSX/supplementary NEURIPS 2022/CODE_supplementary/src/.___init__.py
- supplementary NEURIPS 2022/CODE_supplementary/src/__pycache__/
- __MACOSX/supplementary NEURIPS 2022/CODE_supplementary/src/.___pycache__
- supplementary NEURIPS 2022/CODE_supplementary/src/data_management.py
- __MACOSX/supplementary NEURIPS 2022/CODE_supplementary/src/._data_management.py
- supplementary NEURIPS 2022/CODE_supplementary/src/general_functions.py
- __MACOSX/supplementary NEURIPS 2022/CODE_supplementary/src/._general_functions.py
- supplementary NEURIPS 2022/CODE_supplementary/data/ml-100k/u.item
- __MACOSX/supplementary NEURIPS 2022/CODE_supplementary/data/ml-100k/._u.item
- supplementary NEURIPS 2022/CODE_supplementary/data/ml-100k/u3.test
- __MACOSX/supplementary NEURIPS 2022/CODE_supplementary/data/ml-100k/._u3.test
- supplementary NEURIPS 2022/CODE_supplementary/data/ml-100k/u1.base
- __MACOSX/supplementary NEURIPS 2022/CODE_supplementary/data/ml-100k/._u1.base
- supplementary NEURIPS 2022/CODE_supplementary/data/ml-100k/u.info
- __MACOSX/supplementary NEURIPS 2022/CODE_supplementary/data/ml-100k/._u.info
- supplementary NEURIPS 2022/CODE_supplementary/data/ml-100k/u2.test
- __MACOSX/supplementary NEURIPS 2022/CODE_supplementary/data/ml-100k/._u2.test
- supplementary NEURIPS 2022/CODE_supplementary/data/ml-100k/u5.test
- __MACOSX/supplementary NEURIPS 2022/CODE_supplementary/data/ml-100k/._u5.test
- supplementary NEURIPS 2022/CODE_supplementary/data/ml-100k/u.genre
- __MACOSX/supplementary NEURIPS 2022/CODE_supplementary/data/ml-100k/._u.genre
- supplementary NEURIPS 2022/CODE_supplementary/data/ml-100k/ub.test
- __MACOSX/supplementary NEURIPS 2022/CODE_supplementary/data/ml-100k/._ub.test
- supplementary NEURIPS 2022/CODE_supplementary/data/ml-100k/README
- __MACOSX/supplementary NEURIPS 2022/CODE_supplementary/data/ml-100k/._README
- supplementary NEURIPS 2022/CODE_supplementary/data/ml-100k/u4.test
- __MACOSX/supplementary NEURIPS 2022/CODE_supplementary/data/ml-100k/._u4.test
- supplementary NEURIPS 2022/CODE_supplementary/data/ml-100k/u5.base
- __MACOSX/supplementary NEURIPS 2022/CODE_supplementary/data/ml-100k/._u5.base
- supplementary NEURIPS 2022/CODE_supplementary/data/ml-100k/ub.base
- __MACOSX/supplementary NEURIPS 2022/CODE_supplementary/data/ml-100k/._ub.base
- supplementary NEURIPS 2022/CODE_supplementary/data/ml-100k/ua.test
- __MACOSX/supplementary NEURIPS 2022/CODE_supplementary/data/ml-100k/._ua.test
- supplementary NEURIPS 2022/CODE_supplementary/data/ml-100k/u4.base
- __MACOSX/supplementary NEURIPS 2022/CODE_supplementary/data/ml-100k/._u4.base
- supplementary NEURIPS 2022/CODE_supplementary/data/ml-100k/u.user
- __MACOSX/supplementary NEURIPS 2022/CODE_supplementary/data/ml-100k/._u.user
- supplementary NEURIPS 2022/CODE_supplementary/data/ml-100k/allbut.pl
- __MACOSX/supplementary NEURIPS 2022/CODE_supplementary/data/ml-100k/._allbut.pl
- supplementary NEURIPS 2022/CODE_supplementary/data/ml-100k/u3.base
- __MACOSX/supplementary NEURIPS 2022/CODE_supplementary/data/ml-100k/._u3.base
- supplementary NEURIPS 2022/CODE_supplementary/data/ml-100k/u1.test
- __MACOSX/supplementary NEURIPS 2022/CODE_supplementary/data/ml-100k/._u1.test
- supplementary NEURIPS 2022/CODE_supplementary/data/ml-100k/mku.sh
- __MACOSX/supplementary NEURIPS 2022/CODE_supplementary/data/ml-100k/._mku.sh
- supplementary NEURIPS 2022/CODE_supplementary/data/ml-100k/u2.base
- __MACOSX/supplementary NEURIPS 2022/CODE_supplementary/data/ml-100k/._u2.base
- supplementary NEURIPS 2022/CODE_supplementary/data/ml-100k/u.occupation
- __MACOSX/supplementary NEURIPS 2022/CODE_supplementary/data/ml-100k/._u.occupation
- supplementary NEURIPS 2022/CODE_supplementary/.idea/inspectionProfiles/profiles_settings.xml
- __MACOSX/supplementary NEURIPS 2022/CODE_supplementary/.idea/inspectionProfiles/._profiles_settings.xml
- supplementary NEURIPS 2022/CODE_supplementary/src/__pycache__/data_management_NEURIPS_2020.cpython-38.pyc
- __MACOSX/supplementary NEURIPS 2022/CODE_supplementary/src/__pycache__/._data_management_NEURIPS_2020.cpython-38.pyc
- supplementary NEURIPS 2022/CODE_supplementary/src/__pycache__/inner_algorithm_NEURIPS_2020.cpython-38.pyc
- __MACOSX/supplementary NEURIPS 2022/CODE_supplementary/src/__pycache__/._inner_algorithm_NEURIPS_2020.cpython-38.pyc
- supplementary NEURIPS 2022/CODE_supplementary/src/__pycache__/inner_algorithm.cpython-38.pyc
- __MACOSX/supplementary NEURIPS 2022/CODE_supplementary/src/__pycache__/._inner_algorithm.cpython-38.pyc
- supplementary NEURIPS 2022/CODE_supplementary/src/__pycache__/__init__.cpython-38.pyc
- __MACOSX/supplementary NEURIPS 2022/CODE_supplementary/src/__pycache__/.___init__.cpython-38.pyc
- supplementary NEURIPS 2022/CODE_supplementary/src/__pycache__/general_functions_NEURIPS_2020.cpython-38.pyc
- __MACOSX/supplementary NEURIPS 2022/CODE_supplementary/src/__pycache__/._general_functions_NEURIPS_2020.cpython-38.pyc
- supplementary NEURIPS 2022/CODE_supplementary/src/__pycache__/data_management.cpython-38.pyc
- __MACOSX/supplementary NEURIPS 2022/CODE_supplementary/src/__pycache__/._data_management.cpython-38.pyc
- supplementary NEURIPS 2022/CODE_supplementary/src/__pycache__/plotting.cpython-38.pyc
- __MACOSX/supplementary NEURIPS 2022/CODE_supplementary/src/__pycache__/._plotting.cpython-38.pyc
- supplementary NEURIPS 2022/CODE_supplementary/src/__pycache__/methods_attempt_parallelizing_BIS.cpython-38.pyc
- __MACOSX/supplementary NEURIPS 2022/CODE_supplementary/src/__pycache__/._methods_attempt_parallelizing_BIS.cpython-38.pyc
- supplementary NEURIPS 2022/CODE_supplementary/src/__pycache__/methods.cpython-38.pyc
- __MACOSX/supplementary NEURIPS 2022/CODE_supplementary/src/__pycache__/._methods.cpython-38.pyc
- supplementary NEURIPS 2022/CODE_supplementary/src/__pycache__/general_functions.cpython-38.pyc
- __MACOSX/supplementary NEURIPS 2022/CODE_supplementary/src/__pycache__/._general_functions.cpython-38.pyc
- supplementary NEURIPS 2022/CODE_supplementary/src/__pycache__/methods_attempt_parallelizing.cpython-38.pyc
- __MACOSX/supplementary NEURIPS 2022/CODE_supplementary/src/__pycache__/._methods_attempt_parallelizing.cpython-38.pyc
- supplementary NEURIPS 2022/CODE_supplementary/src/__pycache__/inner_algorithm_bias.cpython-38.pyc
- __MACOSX/supplementary NEURIPS 2022/CODE_supplementary/src/__pycache__/._inner_algorithm_bias.cpython-38.pyc
- supplementary NEURIPS 2022/CODE_supplementary/src/__pycache__/plotting_NEURIPS_2020.cpython-38.pyc
- __MACOSX/supplementary NEURIPS 2022/CODE_supplementary/src/__pycache__/._plotting_NEURIPS_2020.cpython-38.pyc
- supplementary NEURIPS 2022/CODE_supplementary/src/__pycache__/inner_algorithm_feature.cpython-38.pyc
- __MACOSX/supplementary NEURIPS 2022/CODE_supplementary/src/__pycache__/._inner_algorithm_feature.cpython-38.pyc
- supplementary NEURIPS 2022/CODE_supplementary/src/__pycache__/methods_NEURIPS_2020.cpython-38.pyc
- __MACOSX/supplementary NEURIPS 2022/CODE_supplementary/src/__pycache__/._methods_NEURIPS_2020.cpython-38.pyc
