# Supplementary material
Source: ML conference proceedings conference paper supplement (https://proceedings.neurips.cc/paper_files/paper/2022/hash/01ecd39ca49ddecc5729ca996304781b-Abstract.html)
Supplement: Supplementary file 1 [file 01ecd39ca49ddecc5729ca996304781b-Supplemental-Conference.zip › supplementary NEURIPS 2022/CODE_supplementary/data/ml-100k/mku.sh]

#!/bin/sh

trap `rm -f tmp.$$; exit 1` 1 2 15

for i in 1 2 3 4 5
do
	head -`expr $i \* 20000` u.data | tail -20000 > tmp.$$
	sort -t"	" -k 1,1n -k 2,2n tmp.$$ > u$i.test
	head -`expr \( $i - 1 \) \* 20000` u.data > tmp.$$
	tail -`expr \( 5 - $i \) \* 20000` u.data >> tmp.$$
	sort -t"	" -k 1,1n -k 2,2n tmp.$$ > u$i.base
done

allbut.pl ua 1 10 100000 u.data
sort -t"	" -k 1,1n -k 2,2n ua.base > tmp.$$
mv tmp.$$ ua.base
sort -t"	" -k 1,1n -k 2,2n ua.test > tmp.$$
mv tmp.$$ ua.test

allbut.pl ub 11 20 100000 u.data
sort -t"	" -k 1,1n -k 2,2n ub.base > tmp.$$
mv tmp.$$ ub.base
sort -t"	" -k 1,1n -k 2,2n ub.test > tmp.$$
mv tmp.$$ ub.test
