# Supplementary material
Source: ML conference proceedings conference paper supplement (https://proceedings.neurips.cc/paper_files/paper/2022/hash/01ecd39ca49ddecc5729ca996304781b-Abstract.html)
Supplement: Supplementary file 1 [file 01ecd39ca49ddecc5729ca996304781b-Supplemental-Conference.zip › supplementary NEURIPS 2022/CODE_supplementary/data/ml-100k/u.genre]

unknown|0
Action|1
Adventure|2
Animation|3
Children's|4
Comedy|5
Crime|6
Documentary|7
Drama|8
Fantasy|9
Film-Noir|10
Horror|11
Musical|12
Mystery|13
Romance|14
Sci-Fi|15
Thriller|16
War|17
Western|18
