# Supplementary material
Source: ML conference proceedings conference paper supplement (https://proceedings.neurips.cc/paper_files/paper/2022/hash/01ecd39ca49ddecc5729ca996304781b-Abstract.html)
Supplement: Supplementary file 1 [file 01ecd39ca49ddecc5729ca996304781b-Supplemental-Conference.zip › supplementary NEURIPS 2022/CODE_supplementary/data/ml-100k/u.item]

1|Toy Story (1995)|01-Jan-1995||http://us.imdb.com/M/title-exact?Toy%20Story%20(1995)|0|0|0|1|1|1|0|0|0|0|0|0|0|0|0|0|0|0|0
2|GoldenEye (1995)|01-Jan-1995||http://us.imdb.com/M/title-exact?GoldenEye%20(1995)|0|1|1|0|0|0|0|0|0|0|0|0|0|0|0|0|1|0|0
3|Four Rooms (1995)|01-Jan-1995||http://us.imdb.com/M/title-exact?Four%20Rooms%20(1995)|0|0|0|0|0|0|0|0|0|0|0|0|0|0|0|0|1|0|0
4|Get Shorty (1995)|01-Jan-1995||http://us.imdb.com/M/title-exact?Get%20Shorty%20(1995)|0|1|0|0|0|1|0|0|1|0|0|0|0|0|0|0|0|0|0
5|Copycat (1995)|01-Jan-1995||http://us.imdb.com/M/title-exact?Copycat%20(1995)|0|0|0|0|0|0|1|0|1|0|0|0|0|0|0|0|1|0|0
6|Shanghai Triad (Yao a yao yao dao waipo qiao) (1995)|01-Jan-1995||http://us.imdb.com/Title?Yao+a+yao+yao+dao+waipo+qiao+(1995)|0|0|0|0|0|0|0|0|1|0|0|0|0|0|0|0|0|0|0
7|Twelve Monkeys (1995)|01-Jan-1995||http://us.imdb.com/M/title-exact?Twelve%20Monkeys%20(1995)|0|0|0|0|0|0|0|0|1|0|0|0|0|0|0|1|0|0|0
8|Babe (1995)|01-Jan-1995||http://us.imdb.com/M/title-exact?Babe%20(1995)|0|0|0|0|1|1|0|0|1|0|0|0|0|0|0|0|0|0|0
9|Dead Man Walking (1995)|01-Jan-1995||http://us.imdb.com/M/title-exact?Dead%20Man%20Walking%20(1995)|0|0|0|0|0|0|0|0|1|0|0|0|0|0|0|0|0|0|0
10|Richard III (1995)|22-Jan-1996||http://us.imdb.com/M/title-exact?Richard%20III%20(1995)|0|0|0|0|0|0|0|0|1|0|0|0|0|0|0|0|0|1|0
11|Seven (Se7en) (1995)|01-Jan-1995||http://us.imdb.com/M/title-exact?Se7en%20(1995)|0|0|0|0|0|0|1|0|0|0|0|0|0|0|0|0|1|0|0
12|Usual Suspects, The (1995)|14-Aug-1995||http://us.imdb.com/M/title-exact?Usual%20Suspects,%20The%20(1995)|0|0|0|0|0|0|1|0|0|0|0|0|0|0|0|0|1|0|0
13|Mighty Aphrodite (1995)|30-Oct-1995||http://us.imdb.com/M/title-exact?Mighty%20Aphrodite%20(1995)|0|0|0|0|0|1|0|0|0|0|0|0|0|0|0|0|0|0|0
14|Postino, Il (1994)|01-Jan-1994||http://us.imdb.com/M/title-exact?Postino,%20Il%20(1994)|0|0|0|0|0|0|0|0|1|0|0|0|0|0|1|0|0|0|0
15|Mr. Holland's Opus (1995)|29-Jan-1996||http://us.imdb.com/M/title-exact?Mr.%20Holland's%20Opus%20(1995)|0|0|0|0|0|0|0|0|1|0|0|0|0|0|0|0|0|0|0
16|French Twist (Gazon maudit) (1995)|01-Jan-1995||http://us.imdb.com/M/title-exact?Gazon%20maudit%20(1995)|0|0|0|0|0|1|0|0|0|0|0|0|0|0|1|0|0|0|0
17|From Dusk Till Dawn (1996)|05-Feb-1996||http://us.imdb.com/M/title-exact?From%20Dusk%20Till%20Dawn%20(1996)|0|1|0|0|0|1|1|0|0|0|0|1|0|0|0|0|1|0|0
18|White Balloon, The (1995)|01-Jan-1995||http://us.imdb.com/M/title-exact?Badkonake%20Sefid%20(1995)|0|0|0|0|0|0|0|0|1|0|0|0|0|0|0|0|0|0|0
19|Antonia's Line (1995)|01-Jan-1995||http://us.imdb.com/M/title-exact?Antonia%20(1995)|0|0|0|0|0|0|0|0|1|0|0|0|0|0|0|0|0|0|0
20|Angels and Insects (1995)|01-Jan-1995||http://us.imdb.com/M/title-exact?Angels%20and%20Insects%20(1995)|0|0|0|0|0|0|0|0|1|0|0|0|0|0|1|0|0|0|0
21|Muppet Treasure Island (1996)|16-Feb-1996||http://us.imdb.com/M/title-exact?Muppet%20Treasure%20Island%20(1996)|0|1|1|0|0|1|0|0|0|0|0|0|1|0|0|0|1|0|0
22|Braveheart (1995)|16-Feb-1996||http://us.imdb.com/M/title-exact?Braveheart%20(1995)|0|1|0|0|0|0|0|0|1|0|0|0|0|0|0|0|0|1|0
23|Taxi Driver (1976)|16-Feb-1996||http://us.imdb.com/M/title-exact?Taxi%20Driver%20(1976)|0|0|0|0|0|0|0|0|1|0|0|0|0|0|0|0|1|0|0
24|Rumble in the Bronx (1995)|23-Feb-1996||http://us.imdb.com/M/title-exact?Hong%20Faan%20Kui%20(1995)|0|1|1|0|0|0|1|0|0|0|0|0|0|0|0|0|0|0|0
25|Birdcage, The (1996)|08-Mar-1996||http://us.imdb.com/M/title-exact?Birdcage,%20The%20(1996)|0|0|0|0|0|1|0|0|0|0|0|0|0|0|0|0|0|0|0
26|Brothers McMullen, The (1995)|01-Jan-1995||http://us.imdb.com/M/title-exact?Brothers%20McMullen,%20The%20(1995)|0|0|0|0|0|1|0|0|0|0|0|0|0|0|0|0|0|0|0
27|Bad Boys (1995)|01-Jan-1995||http://us.imdb.com/M/title-exact?Bad%20Boys%20(1995)|0|1|0|0|0|0|0|0|0|0|0|0|0|0|0|0|0|0|0
28|Apollo 13 (1995)|01-Jan-1995||http://us.imdb.com/M/title-exact?Apollo%2013%20(1995)|0|1|0|0|0|0|0|0|1|0|0|0|0|0|0|0|1|0|0
29|Batman Forever (1995)|01-Jan-1995||http://us.imdb.com/M/title-exact?Batman%20Forever%20(1995)|0|1|1|0|0|1|1|0|0|0|0|0|0|0|0|0|0|0|0
30|Belle de jour (1967)|01-Jan-1967||http://us.imdb.com/M/title-exact?Belle%20de%20jour%20(1967)|0|0|0|0|0|0|0|0|1|0|0|0|0|0|0|0|0|0|0
31|Crimson Tide (1995)|01-Jan-1995||http://us.imdb.com/M/title-exact?Crimson%20Tide%20(1995)|0|0|0|0|0|0|0|0|1|0|0|0|0|0|0|0|1|1|0
32|Crumb (1994)|01-Jan-1994||http://us.imdb.com/M/title-exact?Crumb%20(1994)|0|0|0|0|0|0|0|1|0|0|0|0|0|0|0|0|0|0|0
33|Desperado (1995)|01-Jan-1995||http://us.imdb.com/M/title-exact?Desperado%20(1995)|0|1|0|0|0|0|0|0|0|0|0|0|0|0|1|0|1|0|0
34|Doom Generation, The (1995)|01-Jan-1995||http://us.imdb.com/M/title-exact?Doom%20Generation,%20The%20(1995)|0|0|0|0|0|1|0|0|1|0|0|0|0|0|0|0|0|0|0
35|Free Willy 2: The Adventure Home (1995)|01-Jan-1995||http://us.imdb.com/M/title-exact?Free%20Willy%202:%20The%20Adventure%20Home%20(1995)|0|0|1|0|1|0|0|0|1|0|0|0|0|0|0|0|0|0|0
36|Mad Love (1995)|01-Jan-1995||http://us.imdb.com/M/title-exact?Mad%20Love%20(1995)|0|0|0|0|0|0|0|0|1|0|0|0|0|0|1|0|0|0|0
37|Nadja (1994)|01-Jan-1994||http://us.imdb.com/M/title-exact?Nadja%20(1994)|0|0|0|0|0|0|0|0|1|0|0|0|0|0|0|0|0|0|0
38|Net, The (1995)|01-Jan-1995||http://us.imdb.com/M/title-exact?Net,%20The%20(1995)|0|0|0|0|0|0|0|0|0|0|0|0|0|0|0|1|1|0|0
39|Strange Days (1995)|01-Jan-1995||http://us.imdb.com/M/title-exact?Strange%20Days%20(1995)|0|1|0|0|0|0|1|0|0|0|0|0|0|0|0|1|0|0|0
40|To Wong Foo, Thanks for Everything! Julie Newmar (1995)|01-Jan-1995||http://us.imdb.com/M/title-exact?To%20Wong%20Foo,%20Thanks%20for%20Everything!%20Julie%20Newmar%20(1995)|0|0|0|0|0|1|0|0|0|0|0|0|0|0|0|0|0|0|0
41|Billy Madison (1995)|01-Jan-1995||http://us.imdb.com/M/title-exact?Billy%20Madison%20(1995)|0|0|0|0|0|1|0|0|0|0|0|0|0|0|0|0|0|0|0
42|Clerks (1994)|01-Jan-1994||http://us.imdb.com/M/title-exact?Clerks%20(1994)|0|0|0|0|0|1|0|0|0|0|0|0|0|0|0|0|0|0|0
43|Disclosure (1994)|01-Jan-1994||http://us.imdb.com/M/title-exact?Disclosure%20(1994)|0|0|0|0|0|0|0|0|1|0|0|0|0|0|0|0|1|0|0
44|Dolores Claiborne (1994)|01-Jan-1994||http://us.imdb.com/M/title-exact?Dolores%20Claiborne%20(1994)|0|0|0|0|0|0|0|0|1|0|0|0|0|0|0|0|1|0|0
45|Eat Drink Man Woman (1994)|01-Jan-1994||http://us.imdb.com/M/title-exact?Yinshi%20Nan%20Nu%20(1994)|0|0|0|0|0|1|0|0|1|0|0|0|0|0|0|0|0|0|0
46|Exotica (1994)|01-Jan-1994||http://us.imdb.com/M/title-exact?Exotica%20(1994)|0|0|0|0|0|0|0|0|1|0|0|0|0|0|0|0|0|0|0
47|Ed Wood (1994)|01-Jan-1994||http://us.imdb.com/M/title-exact?Ed%20Wood%20(1994)|0|0|0|0|0|1|0|0|1|0|0|0|0|0|0|0|0|0|0
48|Hoop Dreams (1994)|01-Jan-1994||http://us.imdb.com/M/title-exact?Hoop%20Dreams%20(1994)|0|0|0|0|0|0|0|1|0|0|0|0|0|0|0|0|0|0|0
49|I.Q. (1994)|01-Jan-1994||http://us.imdb.com/M/title-exact?I.Q.%20(1994)|0|0|0|0|0|1|0|0|0|0|0|0|0|0|1|0|0|0|0
50|Star Wars (1977)|01-Jan-1977||http://us.imdb.com/M/title-exact?Star%20Wars%20(1977)|0|1|1|0|0|0|0|0|0|0|0|0|0|0|1|1|0|1|0
51|Legends of the Fall (1994)|01-Jan-1994||http://us.imdb.com/M/title-exact?Legends%20of%20the%20Fall%20(1994)|0|0|0|0|0|0|0|0|1|0|0|0|0|0|1|0|0|1|1
52|Madness of King George, The (1994)|01-Jan-1994||http://us.imdb.com/M/title-exact?Madness%20of%20King%20George,%20The%20(1994)|0|0|0|0|0|0|0|0|1|0|0|0|0|0|0|0|0|0|0
53|Natural Born Killers (1994)|01-Jan-1994||http://us.imdb.com/M/title-exact?Natural%20Born%20Killers%20(1994)|0|1|0|0|0|0|0|0|0|0|0|0|0|0|0|0|1|0|0
54|Outbreak (1995)|01-Jan-1995||http://us.imdb.com/M/title-exact?Outbreak%20(1995)|0|1|0|0|0|0|0|0|1|0|0|0|0|0|0|0|1|0|0
55|Professional, The (1994)|01-Jan-1994||http://us.imdb.com/Title?L%E9on+(1994)|0|0|0|0|0|0|1|0|1|0|0|0|0|0|1|0|1|0|0
56|Pulp Fiction (1994)|01-Jan-1994||http://us.imdb.com/M/title-exact?Pulp%20Fiction%20(1994)|0|0|0|0|0|0|1|0|1|0|0|0|0|0|0|0|0|0|0
57|Priest (1994)|01-Jan-1994||http://us.imdb.com/M/title-exact?Priest%20(1994)|0|0|0|0|0|0|0|0|1|0|0|0|0|0|0|0|0|0|0
58|Quiz Show (1994)|01-Jan-1994||http://us.imdb.com/M/title-exact?Quiz%20Show%20(1994)|0|0|0|0|0|0|0|0|1|0|0|0|0|0|0|0|0|0|0
59|Three Colors: Red (1994)|01-Jan-1994||http://us.imdb.com/M/title-exact?Trzy%20kolory:%20Czerwony%20(1994)|0|0|0|0|0|0|0|0|1|0|0|0|0|0|0|0|0|0|0
60|Three Colors: Blue (1993)|01-Jan-1993||http://us.imdb.com/M/title-exact?Trzy%20kolory:%20Niebieski%20(1993)|0|0|0|0|0|0|0|0|1|0|0|0|0|0|0|0|0|0|0
61|Three Colors: White (1994)|01-Jan-1994||http://us.imdb.com/M/title-exact?Trzy%20kolory:%20Bialy%20(1994)|0|0|0|0|0|0|0|0|1|0|0|0|0|0|0|0|0|0|0
62|Stargate (1994)|01-Jan-1994||http://us.imdb.com/M/title-exact?Stargate%20(1994)|0|1|1|0|0|0|0|0|0|0|0|0|0|0|0|1|0|0|0
63|Santa Clause, The (1994)|01-Jan-1994||http://us.imdb.com/M/title-exact?Santa%20Clause,%20The%20(1994)|0|0|0|0|1|1|0|0|0|0|0|0|0|0|0|0|0|0|0
64|Shawshank Redemption, The (1994)|01-Jan-1994||http://us.imdb.com/M/title-exact?Shawshank%20Redemption,%20The%20(1994)|0|0|0|0|0|0|0|0|1|0|0|0|0|0|0|0|0|0|0
65|What's Eating Gilbert Grape (1993)|01-Jan-1993||http://us.imdb.com/M/title-exact?What's%20Eating%20Gilbert%20Grape%20(1993)|0|0|0|0|0|1|0|0|1|0|0|0|0|0|0|0|0|0|0
66|While You Were Sleeping (1995)|01-Jan-1995||http://us.imdb.com/M/title-exact?While%20You%20Were%20Sleeping%20(1995)|0|0|0|0|0|1|0|0|0|0|0|0|0|0|1|0|0|0|0
67|Ace Ventura: Pet Detective (1994)|01-Jan-1994||http://us.imdb.com/M/title-exact?Ace%20Ventura:%20Pet%20Detective%20(1994)|0|0|0|0|0|1|0|0|0|0|0|0|0|0|0|0|0|0|0
68|Crow, The (1994)|01-Jan-1994||http://us.imdb.com/M/title-exact?Crow,%20The%20(1994)|0|1|0|0|0|0|0|0|0|0|0|0|0|0|1|0|1|0|0
69|Forrest Gump (1994)|01-Jan-1994||http://us.imdb.com/M/title-exact?Forrest%20Gump%20(1994)|0|0|0|0|0|1|0|0|0|0|0|0|0|0|1|0|0|1|0
70|Four Weddings and a Funeral (1994)|01-Jan-1994||http://us.imdb.com/M/title-exact?Four%20Weddings%20and%20a%20Funeral%20(1994)|0|0|0|0|0|1|0|0|0|0|0|0|0|0|1|0|0|0|0
71|Lion King, The (1994)|01-Jan-1994||http://us.imdb.com/M/title-exact?Lion%20King,%20The%20(1994)|0|0|0|1|1|0|0|0|0|0|0|0|1|0|0|0|0|0|0
72|Mask, The (1994)|01-Jan-1994||http://us.imdb.com/M/title-exact?Mask,%20The%20(1994)|0|0|0|0|0|1|1|0|0|1|0|0|0|0|0|0|0|0|0
73|Maverick (1994)|01-Jan-1994||http://us.imdb.com/M/title-exact?Maverick%20(1994)|0|1|0|0|0|1|0|0|0|0|0|0|0|0|0|0|0|0|1
74|Faster Pussycat! Kill! Kill! (1965)|01-Jan-1965||http://us.imdb.com/M/title-exact?Faster%20Pussycat!%20Kill!%20Kill!%20(1965)|0|1|0|0|0|1|0|0|1|0|0|0|0|0|0|0|0|0|0
75|Brother Minister: The Assassination of Malcolm X (1994)|01-Jan-1994||http://us.imdb.com/M/title-exact?Brother%20Minister:%20The%20Assassination%20of%20Malcolm%20X%20(1994)|0|0|0|0|0|0|0|1|0|0|0|0|0|0|0|0|0|0|0
76|Carlito's Way (1993)|01-Jan-1993||http://us.imdb.com/M/title-exact?Carlito's%20Way%20(1993)|0|0|0|0|0|0|1|0|1|0|0|0|0|0|0|0|0|0|0
77|Firm, The (1993)|01-Jan-1993||http://us.imdb.com/M/title-exact?Firm,%20The%20(1993)|0|0|0|0|0|0|0|0|1|0|0|0|0|0|0|0|1|0|0
78|Free Willy (1993)|01-Jan-1993||http://us.imdb.com/M/title-exact?Free%20Willy%20(1993)|0|0|1|0|1|0|0|0|1|0|0|0|0|0|0|0|0|0|0
79|Fugitive, The (1993)|01-Jan-1993||http://us.imdb.com/M/title-exact?Fugitive,%20The%20(1993)|0|1|0|0|0|0|0|0|0|0|0|0|0|0|0|0|1|0|0
80|Hot Shots! Part Deux (1993)|01-Jan-1993||http://us.imdb.com/M/title-exact?Hot%20Shots!%20Part%20Deux%20(1993)|0|1|0|0|0|1|0|0|0|0|0|0|0|0|0|0|0|1|0
81|Hudsucker Proxy, The (1994)|01-Jan-1994||http://us.imdb.com/M/title-exact?Hudsucker%20Proxy,%20The%20(1994)|0|0|0|0|0|1|0|0|0|0|0|0|0|0|1|0|0|0|0
82|Jurassic Park (1993)|01-Jan-1993||http://us.imdb.com/M/title-exact?Jurassic%20Park%20(1993)|0|1|1|0|0|0|0|0|0|0|0|0|0|0|0|1|0|0|0
83|Much Ado About Nothing (1993)|01-Jan-1993||http://us.imdb.com/M/title-exact?Much%20Ado%20About%20Nothing%20(1993)|0|0|0|0|0|1|0|0|0|0|0|0|0|0|1|0|0|0|0
84|Robert A. Heinlein's The Puppet Masters (1994)|01-Jan-1994||http://us.imdb.com/M/title-exact?Robert%20A.%20Heinlein's%20The%20Puppet%20Masters%20(1994)|0|0|0|0|0|0|0|0|0|0|0|1|0|0|0|1|0|0|0
85|Ref, The (1994)|01-Jan-1994||http://us.imdb.com/M/title-exact?Ref,%20The%20(1994)|0|0|0|0|0|1|0|0|0|0|0|0|0|0|0|0|0|0|0
86|Remains of the Day, The (1993)|01-Jan-1993||http://us.imdb.com/M/title-exact?Remains%20of%20the%20Day,%20The%20(1993)|0|0|0|0|0|0|0|0|1|0|0|0|0|0|0|0|0|0|0
87|Searching for Bobby Fischer (1993)|01-Jan-1993||http://us.imdb.com/M/title-exact?Searching%20for%20Bobby%20Fischer%20(1993)|0|0|0|0|0|0|0|0|1|0|0|0|0|0|0|0|0|0|0
88|Sleepless in Seattle (1993)|01-Jan-1993||http://us.imdb.com/M/title-exact?Sleepless%20in%20Seattle%20(1993)|0|0|0|0|0|1|0|0|0|0|0|0|0|0|1|0|0|0|0
89|Blade Runner (1982)|01-Jan-1982||http://us.imdb.com/M/title-exact?Blade%20Runner%20(1982)|0|0|0|0|0|0|0|0|0|0|1|0|0|0|0|1|0|0|0
90|So I Married an Axe Murderer (1993)|01-Jan-1993||http://us.imdb.com/M/title-exact?So%20I%20Married%20an%20Axe%20Murderer%20(1993)|0|0|0|0|0|1|0|0|0|0|0|0|0|0|1|0|1|0|0
91|Nightmare Before Christmas, The (1993)|01-Jan-1993||http://us.imdb.com/M/title-exact?Nightmare%20Before%20Christmas,%20The%20(1993)|0|0|0|0|1|1|0|0|0|0|0|0|1|0|0|0|0|0|0
92|True Romance (1993)|01-Jan-1993||http://us.imdb.com/M/title-exact?True%20Romance%20(1993)|0|1|0|0|0|0|1|0|0|0|0|0|0|0|1|0|0|0|0
93|Welcome to the Dollhouse (1995)|24-May-1996||http://us.imdb.com/Title?Welcome+to+the+Dollhouse+(1995)|0|0|0|0|0|1|0|0|1|0|0|0|0|0|0|0|0|0|0
94|Home Alone (1990)|01-Jan-1990||http://us.imdb.com/M/title-exact?Home%20Alone%20(1990)|0|0|0|0|1|1|0|0|0|0|0|0|0|0|0|0|0|0|0
95|Aladdin (1992)|01-Jan-1992||http://us.imdb.com/M/title-exact?Aladdin%20(1992)|0|0|0|1|1|1|0|0|0|0|0|0|1|0|0|0|0|0|0
96|Terminator 2: Judgment Day (1991)|01-Jan-1991||http://us.imdb.com/M/title-exact?Terminator%202:%20Judgment%20Day%20(1991)|0|1|0|0|0|0|0|0|0|0|0|0|0|0|0|1|1|0|0
97|Dances with Wolves (1990)|01-Jan-1990||http://us.imdb.com/M/title-exact?Dances%20with%20Wolves%20(1990)|0|0|1|0|0|0|0|0|1|0|0|0|0|0|0|0|0|0|1
98|Silence of the Lambs, The (1991)|01-Jan-1991||http://us.imdb.com/M/title-exact?Silence%20of%20the%20Lambs,%20The%20(1991)|0|0|0|0|0|0|0|0|1|0|0|0|0|0|0|0|1|0|0
99|Snow White and the Seven Dwarfs (1937)|01-Jan-1937||http://us.imdb.com/M/title-exact?Snow%20White%20and%20the%20Seven%20Dwarfs%20(1937)|0|0|0|1|1|0|0|0|0|0|0|0|1|0|0|0|0|0|0
100|Fargo (1996)|14-Feb-1997||http://us.imdb.com/M/title-exact?Fargo%20(1996)|0|0|0|0|0|0|1|0|1|0|0|0|0|0|0|0|1|0|0
101|Heavy Metal (1981)|08-Mar-1981||http://us.imdb.com/M/title-exact?Heavy%20Metal%20(1981)|0|1|1|1|0|0|0|0|0|0|0|1|0|0|0|1|0|0|0
102|Aristocats, The (1970)|01-Jan-1970||http://us.imdb.com/M/title-exact?Aristocats,%20The%20(1970)|0|0|0|1|1|0|0|0|0|0|0|0|0|0|0|0|0|0|0
103|All Dogs Go to Heaven 2 (1996)|29-Mar-1996||http://us.imdb.com/M/title-exact?All%20Dogs%20Go%20to%20Heaven%202%20(1996)|0|0|0|1|1|0|0|0|0|0|0|0|1|0|0|0|0|0|0
104|Theodore Rex (1995)|29-Mar-1996||http://us.imdb.com/M/title-exact?Theodore%20Rex%20(1995)|0|0|0|0|0|1|0|0|0|0|0|0|0|0|0|0|0|0|0
105|Sgt. Bilko (1996)|29-Mar-1996||http://us.imdb.com/M/title-exact?Sgt.%20Bilko%20(1996)|0|0|0|0|0|1|0|0|0|0|0|0|0|0|0|0|0|0|0
106|Diabolique (1996)|01-Jan-1996||http://us.imdb.com/M/title-exact?Diabolique%20(1996)|0|0|0|0|0|0|0|0|1|0|0|0|0|0|0|0|1|0|0
107|Moll Flanders (1996)|14-Jun-1996||http://us.imdb.com/M/title-exact?Moll%20Flanders%20(1996)|0|0|0|0|0|0|0|0|1|0|0|0|0|0|0|0|0|0|0
108|Kids in the Hall: Brain Candy (1996)|12-Apr-1996||http://us.imdb.com/M/title-exact?Kids%20in%20the%20Hall:%20Brain%20Candy%20(1996)|0|0|0|0|0|1|0|0|0|0|0|0|0|0|0|0|0|0|0
109|Mystery Science Theater 3000: The Movie (1996)|19-Apr-1996||http://us.imdb.com/M/title-exact?Mystery%20Science%20Theater%203000:%20The%20Movie%20(1996)|0|0|0|0|0|1|0|0|0|0|0|0|0|0|0|1|0|0|0
110|Operation Dumbo Drop (1995)|01-Jan-1995||http://us.imdb.com/M/title-exact?Operation%20Dumbo%20Drop%20(1995)|0|1|1|0|0|1|0|0|0|0|0|0|0|0|0|0|0|1|0
111|Truth About Cats & Dogs, The (1996)|26-Apr-1996||http://us.imdb.com/M/title-exact?Truth%20About%20Cats%20&%20Dogs,%20The%20(1996)|0|0|0|0|0|1|0|0|0|0|0|0|0|0|1|0|0|0|0
112|Flipper (1996)|10-May-1996||http://us.imdb.com/M/title-exact?Flipper%20(1996)|0|0|1|0|1|0|0|0|0|0|0|0|0|0|0|0|0|0|0
113|Horseman on the Roof, The (Hussard sur le toit, Le) (1995)|19-Apr-1996||http://us.imdb.com/M/title-exact?Hussard%20sur%20le%20toit,%20Le%20(1995)|0|0|0|0|0|0|0|0|1|0|0|0|0|0|0|0|0|0|0
114|Wallace & Gromit: The Best of Aardman Animation (1996)|05-Apr-1996||http://us.imdb.com/Title?Wallace+%26+Gromit%3A+The+Best+of+Aardman+Animation+(1996)|0|0|0|1|0|0|0|0|0|0|0|0|0|0|0|0|0|0|0
115|Haunted World of Edward D. Wood Jr., The (1995)|26-Apr-1996||http://us.imdb.com/Title?Haunted+World+of+Edward+D.+Wood+Jr.,+The+(1995)|0|0|0|0|0|0|0|1|0|0|0|0|0|0|0|0|0|0|0
116|Cold Comfort Farm (1995)|23-Apr-1996||http://us.imdb.com/M/title-exact?Cold%20Comfort%20Farm%20(1995)%20(TV)|0|0|0|0|0|1|0|0|0|0|0|0|0|0|0|0|0|0|0
117|Rock, The (1996)|07-Jun-1996||http://us.imdb.com/M/title-exact?Rock,%20The%20(1996)|0|1|1|0|0|0|0|0|0|0|0|0|0|0|0|0|1|0|0
118|Twister (1996)|10-May-1996||http://us.imdb.com/M/title-exact?Twister%20(1996)|0|1|1|0|0|0|0|0|0|0|0|0|0|0|0|0|1|0|0
119|Maya Lin: A Strong Clear Vision (1994)|01-Jan-1994||http://us.imdb.com/M/title-exact?Maya%20Lin:%20A%20Strong%20Clear%20Vision%20(1994)|0|0|0|0|0|0|0|1|0|0|0|0|0|0|0|0|0|0|0
120|Striptease (1996)|28-Jun-1996||http://us.imdb.com/M/title-exact?Striptease%20(1996)|0|0|0|0|0|1|1|0|0|0|0|0|0|0|0|0|0|0|0
121|Independence Day (ID4) (1996)|03-Jul-1996||http://us.imdb.com/M/title-exact?Independence%20Day%20(1996)|0|1|0|0|0|0|0|0|0|0|0|0|0|0|0|1|0|1|0
122|Cable Guy, The (1996)|14-Jun-1996||http://us.imdb.com/M/title-exact?Cable%20Guy,%20The%20(1996)|0|0|0|0|0|1|0|0|0|0|0|0|0|0|0|0|0|0|0
123|Frighteners, The (1996)|19-Jul-1996||http://us.imdb.com/M/title-exact?Frighteners,%20The%20(1996)|0|0|0|0|0|1|0|0|0|0|0|1|0|0|0|0|0|0|0
124|Lone Star (1996)|21-Jun-1996||http://us.imdb.com/M/title-exact?Lone%20Star%20(1996)|0|0|0|0|0|0|0|0|1|0|0|0|0|1|0|0|0|0|0
125|Phenomenon (1996)|29-Jun-1996||http://us.imdb.com/M/title-exact?Phenomenon%20(1996)|0|0|0|0|0|0|0|0|1|0|0|0|0|0|1|0|0|0|0
126|Spitfire Grill, The (1996)|06-Sep-1996||http://us.imdb.com/M/title-exact?Spitfire%20Grill,%20The%20(1996)|0|0|0|0|0|0|0|0|1|0|0|0|0|0|0|0|0|0|0
127|Godfather, The (1972)|01-Jan-1972||http://us.imdb.com/M/title-exact?Godfather,%20The%20(1972)|0|1|0|0|0|0|1|0|1|0|0|0|0|0|0|0|0|0|0
128|Supercop (1992)|26-Jul-1996||http://us.imdb.com/M/title-exact?Police%20Story%20III:%20Supercop%20(1992)|0|1|0|0|0|0|0|0|0|0|0|0|0|0|0|0|1|0|0
129|Bound (1996)|04-Oct-1996||http://us.imdb.com/M/title-exact?Bound%20(1996)|0|0|0|0|0|0|1|0|1|0|0|0|0|0|1|0|1|0|0
130|Kansas City (1996)|16-Aug-1996||http://us.imdb.com/M/title-exact?Kansas%20City%20(1996)|0|0|0|0|0|0|1|0|0|0|0|0|0|0|0|0|0|0|0
131|Breakfast at Tiffany's (1961)|01-Jan-1961||http://us.imdb.com/M/title-exact?Breakfast%20at%20Tiffany's%20(1961)|0|0|0|0|0|0|0|0|1|0|0|0|0|0|1|0|0|0|0
132|Wizard of Oz, The (1939)|01-Jan-1939||http://us.imdb.com/M/title-exact?Wizard%20of%20Oz,%20The%20(1939)|0|0|1|0|1|0|0|0|1|0|0|0|1|0|0|0|0|0|0
133|Gone with the Wind (1939)|01-Jan-1939||http://us.imdb.com/M/title-exact?Gone%20with%20the%20Wind%20(1939)|0|0|0|0|0|0|0|0|1|0|0|0|0|0|1|0|0|1|0
134|Citizen Kane (1941)|01-Jan-1941||http://us.imdb.com/M/title-exact?Citizen%20Kane%20(1941)|0|0|0|0|0|0|0|0|1|0|0|0|0|0|0|0|0|0|0
135|2001: A Space Odyssey (1968)|01-Jan-1968||http://us.imdb.com/M/title-exact?2001:%20A%20Space%20Odyssey%20(1968)|0|0|0|0|0|0|0|0|1|0|0|0|0|1|0|1|1|0|0
136|Mr. Smith Goes to Washington (1939)|01-Jan-1939||http://us.imdb.com/M/title-exact?Mr.%20Smith%20Goes%20to%20Washington%20(1939)|0|0|0|0|0|0|0|0|1|0|0|0|0|0|0|0|0|0|0
137|Big Night (1996)|20-Sep-1996||http://us.imdb.com/M/title-exact?Big%20Night%20(1996)|0|0|0|0|0|0|0|0|1|0|0|0|0|0|0|0|0|0|0
138|D3: The Mighty Ducks (1996)|04-Oct-1996||http://us.imdb.com/M/title-exact?D3:%20The%20Mighty%20Ducks%20(1996)|0|0|0|0|1|1|0|0|0|0|0|0|0|0|0|0|0|0|0
139|Love Bug, The (1969)|01-Jan-1969||http://us.imdb.com/M/title-exact?Love%20Bug,%20The%20(1969)|0|0|0|0|1|1|0|0|0|0|0|0|0|0|0|0|0|0|0
140|Homeward Bound: The Incredible Journey (1993)|01-Jan-1993||http://us.imdb.com/M/title-exact?Homeward%20Bound:%20The%20Incredible%20Journey%20(1993)|0|0|1|0|1|0|0|0|0|0|0|0|0|0|0|0|0|0|0
141|20,000 Leagues Under the Sea (1954)|01-Jan-1954||http://us.imdb.com/M/title-exact?20,000%20Leagues%20Under%20the%20Sea%20(1954)|0|0|1|0|1|0|0|0|0|1|0|0|0|0|0|1|0|0|0
142|Bedknobs and Broomsticks (1971)|01-Jan-1971||http://us.imdb.com/M/title-exact?Bedknobs%20and%20Broomsticks%20(1971)|0|0|1|0|1|0|0|0|0|0|0|0|1|0|0|0|0|0|0
143|Sound of Music, The (1965)|01-Jan-1965||http://us.imdb.com/M/title-exact?Sound%20of%20Music,%20The%20(1965)|0|0|0|0|0|0|0|0|0|0|0|0|1|0|0|0|0|0|0
144|Die Hard (1988)|01-Jan-1988||http://us.imdb.com/M/title-exact?Die%20Hard%20(1988)|0|1|0|0|0|0|0|0|0|0|0|0|0|0|0|0|1|0|0
145|Lawnmower Man, The (1992)|01-Jan-1992||http://us.imdb.com/M/title-exact?Lawnmower%20Man,%20The%20(1992)|0|1|0|0|0|0|0|0|0|0|0|0|0|0|0|1|1|0|0
146|Unhook the Stars (1996)|30-Oct-1996||http://us.imdb.com/M/title-exact?Unhook%20the%20Stars%20(1996)|0|0|0|0|0|0|0|0|1|0|0|0|0|0|0|0|0|0|0
147|Long Kiss Goodnight, The (1996)|05-Oct-1996||http://us.imdb.com/M/title-exact?Long%20Kiss%20Goodnight,%20The%20(1996)|0|1|0|0|0|0|0|0|0|0|0|0|0|0|0|0|1|0|0
148|Ghost and the Darkness, The (1996)|11-Oct-1996||http://us.imdb.com/M/title-exact?Ghost%20and%20the%20Darkness,%20The%20(1996)|0|1|1|0|0|0|0|0|0|0|0|0|0|0|0|0|0|0|0
149|Jude (1996)|01-Nov-1996||http://us.imdb.com/M/title-exact?Jude%20(1996)|0|0|0|0|0|0|0|0|1|0|0|0|0|0|0|0|0|0|0
150|Swingers (1996)|18-Oct-1996||http://us.imdb.com/M/title-exact?Swingers%20(1996)|0|0|0|0|0|1|0|0|1|0|0|0|0|0|0|0|0|0|0
151|Willy Wonka and the Chocolate Factory (1971)|01-Jan-1971||http://us.imdb.com/M/title-exact?Willy%20Wonka%20and%20the%20Chocolate%20Factory%20(1971)|0|0|1|0|1|1|0|0|0|0|0|0|0|0|0|0|0|0|0
152|Sleeper (1973)|01-Jan-1973||http://us.imdb.com/M/title-exact?Sleeper%20(1973)|0|0|0|0|0|1|0|0|0|0|0|0|0|0|0|1|0|0|0
153|Fish Called Wanda, A (1988)|01-Jan-1988||http://us.imdb.com/M/title-exact?Fish%20Called%20Wanda,%20A%20(1988)|0|0|0|0|0|1|0|0|0|0|0|0|0|0|0|0|0|0|0
154|Monty Python's Life of Brian (1979)|01-Jan-1979||http://us.imdb.com/M/title-exact?Life%20of%20Brian%20(1979)|0|0|0|0|0|1|0|0|0|0|0|0|0|0|0|0|0|0|0
155|Dirty Dancing (1987)|01-Jan-1987||http://us.imdb.com/M/title-exact?Dirty%20Dancing%20(1987)|0|0|0|0|0|0|0|0|0|0|0|0|1|0|1|0|0|0|0
156|Reservoir Dogs (1992)|01-Jan-1992||http://us.imdb.com/M/title-exact?Reservoir%20Dogs%20(1992)|0|0|0|0|0|0|1|0|0|0|0|0|0|0|0|0|1|0|0
157|Platoon (1986)|01-Jan-1986||http://us.imdb.com/M/title-exact?Platoon%20(1986)|0|0|0|0|0|0|0|0|1|0|0|0|0|0|0|0|0|1|0
158|Weekend at Bernie's (1989)|01-Jan-1989||http://us.imdb.com/M/title-exact?Weekend%20at%20Bernie's%20(1989)|0|0|0|0|0|1|0|0|0|0|0|0|0|0|0|0|0|0|0
159|Basic Instinct (1992)|01-Jan-1992||http://us.imdb.com/M/title-exact?Basic%20Instinct%20(1992)|0|0|0|0|0|0|0|0|0|0|0|0|0|1|0|0|1|0|0
160|Glengarry Glen Ross (1992)|01-Jan-1992||http://us.imdb.com/M/title-exact?Glengarry%20Glen%20Ross%20(1992)|0|0|0|0|0|0|0|0|1|0|0|0|0|0|0|0|0|0|0
161|Top Gun (1986)|01-Jan-1986||http://us.imdb.com/M/title-exact?Top%20Gun%20(1986)|0|1|0|0|0|0|0|0|0|0|0|0|0|0|1|0|0|0|0
162|On Golden Pond (1981)|01-Jan-1981||http://us.imdb.com/M/title-exact?On%20Golden%20Pond%20(1981)|0|0|0|0|0|0|0|0|1|0|0|0|0|0|0|0|0|0|0
163|Return of the Pink Panther, The (1974)|01-Jan-1974||http://us.imdb.com/M/title-exact?Return%20of%20the%20Pink%20Panther,%20The%20(1974)|0|0|0|0|0|1|0|0|0|0|0|0|0|0|0|0|0|0|0
164|Abyss, The (1989)|01-Jan-1989||http://us.imdb.com/M/title-exact?Abyss,%20The%20(1989)|0|1|1|0|0|0|0|0|0|0|0|0|0|0|0|1|1|0|0
165|Jean de Florette (1986)|01-Jan-1986||http://us.imdb.com/M/title-exact?Jean%20de%20Florette%20(1986)|0|0|0|0|0|0|0|0|1|0|0|0|0|0|0|0|0|0|0
166|Manon of the Spring (Manon des sources) (1986)|01-Jan-1986||http://us.imdb.com/M/title-exact?Manon%20des%20sources%20(1986)|0|0|0|0|0|0|0|0|1|0|0|0|0|0|0|0|0|0|0
167|Private Benjamin (1980)|01-Jan-1980||http://us.imdb.com/M/title-exact?Private%20Benjamin%20(1980)|0|0|0|0|0|1|0|0|0|0|0|0|0|0|0|0|0|0|0
168|Monty Python and the Holy Grail (1974)|01-Jan-1974||http://us.imdb.com/M/title-exact?Monty%20Python%20and%20the%20Holy%20Grail%20(1974)|0|0|0|0|0|1|0|0|0|0|0|0|0|0|0|0|0|0|0
169|Wrong Trousers, The (1993)|01-Jan-1993||http://us.imdb.com/M/title-exact?Wrong%20Trousers,%20The%20(1993)|0|0|0|1|0|1|0|0|0|0|0|0|0|0|0|0|0|0|0
170|Cinema Paradiso (1988)|01-Jan-1988||http://us.imdb.com/M/title-exact?Nuovo%20cinema%20Paradiso%20(1988)|0|0|0|0|0|1|0|0|1|0|0|0|0|0|1|0|0|0|0
171|Delicatessen (1991)|01-Jan-1991||http://us.imdb.com/M/title-exact?Delicatessen%20(1991)|0|0|0|0|0|1|0|0|0|0|0|0|0|0|0|1|0|0|0
172|Empire Strikes Back, The (1980)|01-Jan-1980||http://us.imdb.com/M/title-exact?Empire%20Strikes%20Back,%20The%20(1980)|0|1|1|0|0|0|0|0|1|0|0|0|0|0|1|1|0|1|0
173|Princess Bride, The (1987)|01-Jan-1987||http://us.imdb.com/M/title-exact?Princess%20Bride,%20The%20(1987)|0|1|1|0|0|1|0|0|0|0|0|0|0|0|1|0|0|0|0
174|Raiders of the Lost Ark (1981)|01-Jan-1981||http://us.imdb.com/M/title-exact?Raiders%20of%20the%20Lost%20Ark%20(1981)|0|1|1|0|0|0|0|0|0|0|0|0|0|0|0|0|0|0|0
175|Brazil (1985)|01-Jan-1985||http://us.imdb.com/M/title-exact?Brazil%20(1985)|0|0|0|0|0|0|0|0|0|0|0|0|0|0|0|1|0|0|0
176|Aliens (1986)|01-Jan-1986||http://us.imdb.com/M/title-exact?Aliens%20(1986)|0|1|0|0|0|0|0|0|0|0|0|0|0|0|0|1|1|1|0
177|Good, The Bad and The Ugly, The (1966)|01-Jan-1966||http://us.imdb.com/M/title-exact?Buono,%20il%20brutto,%20il%20cattivo,%20Il%20(1966)|0|1|0|0|0|0|0|0|0|0|0|0|0|0|0|0|0|0|1
178|12 Angry Men (1957)|01-Jan-1957||http://us.imdb.com/M/title-exact?12%20Angry%20Men%20(1957)|0|0|0|0|0|0|0|0|1|0|0|0|0|0|0|0|0|0|0
179|Clockwork Orange, A (1971)|01-Jan-1971||http://us.imdb.com/M/title-exact?Clockwork%20Orange,%20A%20(1971)|0|0|0|0|0|0|0|0|0|0|0|0|0|0|0|1|0|0|0
180|Apocalypse Now (1979)|01-Jan-1979||http://us.imdb.com/M/title-exact?Apocalypse%20Now%20(1979)|0|0|0|0|0|0|0|0|1|0|0|0|0|0|0|0|0|1|0
181|Return of the Jedi (1983)|14-Mar-1997||http://us.imdb.com/M/title-exact?Return%20of%20the%20Jedi%20(1983)|0|1|1|0|0|0|0|0|0|0|0|0|0|0|1|1|0|1|0
182|GoodFellas (1990)|01-Jan-1990||http://us.imdb.com/M/title-exact?GoodFellas%20(1990)|0|0|0|0|0|0|1|0|1|0|0|0|0|0|0|0|0|0|0
183|Alien (1979)|01-Jan-1979||http://us.imdb.com/M/title-exact?Alien%20(1979)|0|1|0|0|0|0|0|0|0|0|0|1|0|0|0|1|1|0|0
184|Army of Darkness (1993)|01-Jan-1993||http://us.imdb.com/M/title-exact?Army%20of%20Darkness%20(1993)|0|1|1|0|0|1|0|0|0|0|0|1|0|0|0|1|0|0|0
185|Psycho (1960)|01-Jan-1960||http://us.imdb.com/M/title-exact?Psycho%20(1960)|0|0|0|0|0|0|0|0|0|0|0|1|0|0|1|0|1|0|0
186|Blues Brothers, The (1980)|01-Jan-1980||http://us.imdb.com/M/title-exact?Blues%20Brothers,%20The%20(1980)|0|1|0|0|0|1|0|0|0|0|0|0|1|0|0|0|0|0|0
187|Godfather: Part II, The (1974)|01-Jan-1974||http://us.imdb.com/M/title-exact?Godfather:%20Part%20II,%20The%20(1974)|0|1|0|0|0|0|1|0|1|0|0|0|0|0|0|0|0|0|0
188|Full Metal Jacket (1987)|01-Jan-1987||http://us.imdb.com/M/title-exact?Full%20Metal%20Jacket%20(1987)|0|1|0|0|0|0|0|0|1|0|0|0|0|0|0|0|0|1|0
189|Grand Day Out, A (1992)|01-Jan-1992||http://us.imdb.com/M/title-exact?Grand%20Day%20Out,%20A%20(1992)|0|0|0|1|0|1|0|0|0|0|0|0|0|0|0|0|0|0|0
190|Henry V (1989)|01-Jan-1989||http://us.imdb.com/M/title-exact?Henry%20V%20(1989)|0|0|0|0|0|0|0|0|1|0|0|0|0|0|0|0|0|1|0
191|Amadeus (1984)|01-Jan-1984||http://us.imdb.com/M/title-exact?Amadeus%20(1984)|0|0|0|0|0|0|0|0|1|0|0|0|0|1|0|0|0|0|0
192|Raging Bull (1980)|01-Jan-1980||http://us.imdb.com/M/title-exact?Raging%20Bull%20(1980)|0|0|0|0|0|0|0|0|1|0|0|0|0|0|0|0|0|0|0
193|Right Stuff, The (1983)|01-Jan-1983||http://us.imdb.com/M/title-exact?Right%20Stuff,%20The%20(1983)|0|0|0|0|0|0|0|0|1|0|0|0|0|0|0|0|0|0|0
194|Sting, The (1973)|01-Jan-1973||http://us.imdb.com/M/title-exact?Sting,%20The%20(1973)|0|0|0|0|0|1|1|0|0|0|0|0|0|0|0|0|0|0|0
195|Terminator, The (1984)|01-Jan-1984||http://us.imdb.com/M/title-exact?Terminator,%20The%20(1984)|0|1|0|0|0|0|0|0|0|0|0|0|0|0|0|1|1|0|0
196|Dead Poets Society (1989)|01-Jan-1989||http://us.imdb.com/M/title-exact?Dead%20Poets%20Society%20(1989)|0|0|0|0|0|0|0|0|1|0|0|0|0|0|0|0|0|0|0
197|Graduate, The (1967)|01-Jan-1967||http://us.imdb.com/M/title-exact?Graduate,%20The%20(1967)|0|0|0|0|0|0|0|0|1|0|0|0|0|0|1|0|0|0|0
198|Nikita (La Femme Nikita) (1990)|01-Jan-1990||http://us.imdb.com/M/title-exact?Nikita%20(1990)|0|0|0|0|0|0|0|0|0|0|0|0|0|0|0|0|1|0|0
199|Bridge on the River Kwai, The (1957)|01-Jan-1957||http://us.imdb.com/M/title-exact?Bridge%20on%20the%20River%20Kwai,%20The%20(1957)|0|0|0|0|0|0|0|0|1|0|0|0|0|0|0|0|0|1|0
200|Shining, The (1980)|01-Jan-1980||http://us.imdb.com/M/title-exact?Shining,%20The%20(1980)|0|0|0|0|0|0|0|0|0|0|0|1|0|0|0|0|0|0|0
201|Evil Dead II (1987)|01-Jan-1987||http://us.imdb.com/M/title-exact?Evil%20Dead%20II%20(1987)|0|1|1|0|0|1|0|0|0|0|0|1|0|0|0|0|0|0|0
202|Groundhog Day (1993)|01-Jan-1993||http://us.imdb.com/M/title-exact?Groundhog%20Day%20(1993)|0|0|0|0|0|1|0|0|0|0|0|0|0|0|1|0|0|0|0
203|Unforgiven (1992)|01-Jan-1992||http://us.imdb.com/M/title-exact?Unforgiven%20(1992)|0|0|0|0|0|0|0|0|0|0|0|0|0|0|0|0|0|0|1
204|Back to the Future (1985)|01-Jan-1985||http://us.imdb.com/M/title-exact?Back%20to%20the%20Future%20(1985)|0|0|0|0|0|1|0|0|0|0|0|0|0|0|0|1|0|0|0
205|Patton (1970)|01-Jan-1970||http://us.imdb.com/M/title-exact?Patton%20(1970)|0|0|0|0|0|0|0|0|1|0|0|0|0|0|0|0|0|1|0
206|Akira (1988)|01-Jan-1988||http://us.imdb.com/M/title-exact?Akira%20(1988)|0|0|1|1|0|0|0|0|0|0|0|0|0|0|0|1|1|0|0
207|Cyrano de Bergerac (1990)|01-Jan-1990||http://us.imdb.com/M/title-exact?Cyrano%20de%20Bergerac%20(1990)|0|1|0|0|0|0|0|0|1|0|0|0|0|0|1|0|0|0|0
208|Young Frankenstein (1974)|01-Jan-1974||http://us.imdb.com/M/title-exact?Young%20Frankenstein%20(1974)|0|0|0|0|0|1|0|0|0|0|0|1|0|0|0|0|0|0|0
209|This Is Spinal Tap (1984)|01-Jan-1984||http://us.imdb.com/M/title-exact?This%20Is%20Spinal%20Tap%20(1984)|0|0|0|0|0|1|0|0|1|0|0|0|1|0|0|0|0|0|0
210|Indiana Jones and the Last Crusade (1989)|01-Jan-1989||http://us.imdb.com/M/title-exact?Indiana%20Jones%20and%20the%20Last%20Crusade%20(1989)|0|1|1|0|0|0|0|0|0|0|0|0|0|0|0|0|0|0|0
211|M*A*S*H (1970)|01-Jan-1970||http://us.imdb.com/M/title-exact?MASH%20(1970)|0|0|0|0|0|1|0|0|0|0|0|0|0|0|0|0|0|1|0
212|Unbearable Lightness of Being, The (1988)|01-Jan-1988||http://us.imdb.com/M/title-exact?Unbearable%20Lightness%20of%20Being,%20The%20(1988)|0|0|0|0|0|0|0|0|1|0|0|0|0|0|0|0|0|0|0
213|Room with a View, A (1986)|01-Jan-1986||http://us.imdb.com/M/title-exact?Room%20with%20a%20View,%20A%20(1986)|0|0|0|0|0|0|0|0|1|0|0|0|0|0|1|0|0|0|0
214|Pink Floyd - The Wall (1982)|01-Jan-1982||http://us.imdb.com/M/title-exact?Pink%20Floyd%20-%20The%20Wall%20(1982)|0|0|0|0|0|0|0|0|1|0|0|0|1|0|0|0|0|1|0
215|Field of Dreams (1989)|01-Jan-1989||http://us.imdb.com/M/title-exact?Field%20of%20Dreams%20(1989)|0|0|0|0|0|0|0|0|1|0|0|0|0|0|0|0|0|0|0
216|When Harry Met Sally... (1989)|01-Jan-1989||http://us.imdb.com/M/title-exact?When%20Harry%20Met%20Sally...%20(1989)|0|0|0|0|0|1|0|0|0|0|0|0|0|0|1|0|0|0|0
217|Bram Stoker's Dracula (1992)|01-Jan-1992||http://us.imdb.com/M/title-exact?Bram%20Stoker's%20Dracula%20(1992)|0|0|0|0|0|0|0|0|0|0|0|1|0|0|1|0|0|0|0
218|Cape Fear (1991)|01-Jan-1991||http://us.imdb.com/M/title-exact?Cape%20Fear%20(1991)|0|0|0|0|0|0|0|0|0|0|0|0|0|0|0|0|1|0|0
219|Nightmare on Elm Street, A (1984)|01-Jan-1984||http://us.imdb.com/M/title-exact?Nightmare%20on%20Elm%20Street,%20A%20(1984)|0|0|0|0|0|0|0|0|0|0|0|1|0|0|0|0|0|0|0
220|Mirror Has Two Faces, The (1996)|15-Nov-1996||http://us.imdb.com/M/title-exact?Mirror%20Has%20Two%20Faces,%20The%20(1996)|0|0|0|0|0|1|0|0|0|0|0|0|0|0|1|0|0|0|0
221|Breaking the Waves (1996)|15-Nov-1996||http://us.imdb.com/M/title-exact?Breaking%20the%20Waves%20(1996)|0|0|0|0|0|0|0|0|1|0|0|0|0|0|0|0|0|0|0
222|Star Trek: First Contact (1996)|22-Nov-1996||http://us.imdb.com/M/title-exact?Star%20Trek:%20First%20Contact%20(1996)|0|1|1|0|0|0|0|0|0|0|0|0|0|0|0|1|0|0|0
223|Sling Blade (1996)|22-Nov-1996||http://us.imdb.com/M/title-exact?Sling%20Blade%20(1996)|0|0|0|0|0|0|0|0|1|0|0|0|0|0|0|0|1|0|0
224|Ridicule (1996)|27-Nov-1996||http://us.imdb.com/M/title-exact?Ridicule%20(1996)|0|0|0|0|0|0|0|0|1|0|0|0|0|0|0|0|0|0|0
225|101 Dalmatians (1996)|27-Nov-1996||http://us.imdb.com/M/title-exact?101%20Dalmatians%20(1996)|0|0|0|0|1|1|0|0|0|0|0|0|0|0|0|0|0|0|0
226|Die Hard 2 (1990)|01-Jan-1990||http://us.imdb.com/M/title-exact?Die%20Hard%202%20(1990)|0|1|0|0|0|0|0|0|0|0|0|0|0|0|0|0|1|0|0
227|Star Trek VI: The Undiscovered Country (1991)|01-Jan-1991||http://us.imdb.com/M/title-exact?Star%20Trek%20VI:%20The%20Undiscovered%20Country%20(1991)|0|1|1|0|0|0|0|0|0|0|0|0|0|0|0|1|0|0|0
228|Star Trek: The Wrath of Khan (1982)|01-Jan-1982||http://us.imdb.com/M/title-exact?Star%20Trek:%20The%20Wrath%20of%20Khan%20(1982)|0|1|1|0|0|0|0|0|0|0|0|0|0|0|0|1|0|0|0
229|Star Trek III: The Search for Spock (1984)|01-Jan-1984||http://us.imdb.com/M/title-exact?Star%20Trek%20III:%20The%20Search%20for%20Spock%20(1984)|0|1|1|0|0|0|0|0|0|0|0|0|0|0|0|1|0|0|0
230|Star Trek IV: The Voyage Home (1986)|01-Jan-1986||http://us.imdb.com/M/title-exact?Star%20Trek%20IV:%20The%20Voyage%20Home%20(1986)|0|1|1|0|0|0|0|0|0|0|0|0|0|0|0|1|0|0|0
231|Batman Returns (1992)|01-Jan-1992||http://us.imdb.com/M/title-exact?Batman%20Returns%20(1992)|0|1|1|0|0|1|1|0|0|0|0|0|0|0|0|0|0|0|0
232|Young Guns (1988)|01-Jan-1988||http://us.imdb.com/M/title-exact?Young%20Guns%20(1988)|0|1|0|0|0|1|0|0|0|0|0|0|0|0|0|0|0|0|1
233|Under Siege (1992)|01-Jan-1992||http://us.imdb.com/M/title-exact?Under%20Siege%20(1992)|0|1|0|0|0|0|0|0|0|0|0|0|0|0|0|0|0|0|0
234|Jaws (1975)|01-Jan-1975||http://us.imdb.com/M/title-exact?Jaws%20(1975)|0|1|0|0|0|0|0|0|0|0|0|1|0|0|0|0|0|0|0
235|Mars Attacks! (1996)|13-Dec-1996||http://us.imdb.com/M/title-exact?Mars%20Attacks!%20(1996)|0|1|0|0|0|1|0|0|0|0|0|0|0|0|0|1|0|1|0
236|Citizen Ruth (1996)|13-Dec-1996||http://us.imdb.com/M/title-exact?Citizen%20Ruth%20(1996)|0|0|0|0|0|1|0|0|1|0|0|0|0|0|0|0|0|0|0
237|Jerry Maguire (1996)|13-Dec-1996||http://us.imdb.com/M/title-exact?Jerry%20Maguire%20(1996)|0|0|0|0|0|0|0|0|1|0|0|0|0|0|1|0|0|0|0
238|Raising Arizona (1987)|01-Jan-1987||http://us.imdb.com/M/title-exact?Raising%20Arizona%20(1987)|0|0|0|0|0|1|0|0|0|0|0|0|0|0|0|0|0|0|0
239|Sneakers (1992)|01-Jan-1992||http://us.imdb.com/M/title-exact?Sneakers%20(1992)|0|0|0|0|0|0|1|0|1|0|0|0|0|0|0|1|0|0|0
240|Beavis and Butt-head Do America (1996)|20-Dec-1996||http://us.imdb.com/M/title-exact?Beavis%20and%20Butt-head%20Do%20America%20(1996)|0|0|0|1|0|1|0|0|0|0|0|0|0|0|0|0|0|0|0
241|Last of the Mohicans, The (1992)|01-Jan-1992||http://us.imdb.com/M/title-exact?Last%20of%20the%20Mohicans,%20The%20(1992)|0|1|0|0|0|0|0|0|0|0|0|0|0|0|1|0|0|1|0
242|Kolya (1996)|24-Jan-1997||http://us.imdb.com/M/title-exact?Kolya%20(1996)|0|0|0|0|0|1|0|0|0|0|0|0|0|0|0|0|0|0|0
243|Jungle2Jungle (1997)|07-Mar-1997||http://us.imdb.com/M/title-exact?Jungle2Jungle%20(1997)|0|0|0|0|1|1|0|0|0|0|0|0|0|0|0|0|0|0|0
244|Smilla's Sense of Snow (1997)|14-Mar-1997||http://us.imdb.com/M/title-exact?Smilla%27s%20Sense%20of%20Snow%20(1997)|0|1|0|0|0|0|0|0|1|0|0|0|0|0|0|0|1|0|0
245|Devil's Own, The (1997)|26-Mar-1997||http://us.imdb.com/M/title-exact?Devil%27s%20Own%2C%20The%20(1997)|0|1|0|0|0|0|0|0|1|0|0|0|0|0|0|0|1|1|0
246|Chasing Amy (1997)|01-Jan-1997||http://us.imdb.com/M/title-exact?Chasing+Amy+(1997)|0|0|0|0|0|0|0|0|1|0|0|0|0|0|1|0|0|0|0
247|Turbo: A Power Rangers Movie (1997)|28-Mar-1997||http://us.imdb.com/M/title-exact?Turbo%3A%20A%20Power%20Rangers%20Movie%20%281997%29|0|1|1|0|1|0|0|0|0|0|0|0|0|0|0|0|0|0|0
248|Grosse Pointe Blank (1997)|11-Apr-1997||http://us.imdb.com/M/title-exact?Grosse%20Pointe%20Blank%20%281997%29|0|0|0|0|0|1|1|0|0|0|0|0|0|0|0|0|0|0|0
249|Austin Powers: International Man of Mystery (1997)|02-May-1997||http://us.imdb.com/M/title-exact?Austin%20Powers%3A%20International%20Man%20of%20Mystery%20%281997%29|0|0|0|0|0|1|0|0|0|0|0|0|0|0|0|0|0|0|0
250|Fifth Element, The (1997)|09-May-1997||http://us.imdb.com/M/title-exact?Fifth%20Element%2C%20The%20%281997%29|0|1|0|0|0|0|0|0|0|0|0|0|0|0|0|1|0|0|0
251|Shall We Dance? (1996)|11-Jul-1997||http://us.imdb.com/M/title-exact?Shall%20we%20DANSU%3F%20%281996%29|0|0|0|0|0|1|0|0|0|0|0|0|0|0|0|0|0|0|0
252|Lost World: Jurassic Park, The (1997)|23-May-1997||http://us.imdb.com/M/title-exact?Lost%20World%3A%20Jurassic%20Park%2C%20The%20%281997%29|0|1|1|0|0|0|0|0|0|0|0|0|0|0|0|1|1|0|0
253|Pillow Book, The (1995)|13-Jun-1997||http://us.imdb.com/M/title-exact?Pillow%20Book%2C%20The%20%281995%29|0|0|0|0|0|0|0|0|1|0|0|0|0|0|1|0|0|0|0
254|Batman & Robin (1997)|20-Jun-1997||http://us.imdb.com/M/title-exact?Batman+%26+Robin+(1997)|0|1|1|0|0|0|1|0|0|0|0|0|0|0|0|0|0|0|0
255|My Best Friend's Wedding (1997)|20-Jun-1997||http://us.imdb.com/M/title-exact?My+Best+Friend%27s+Wedding+(1997)|0|0|0|0|0|1|0|0|0|0|0|0|0|0|1|0|0|0|0
256|When the Cats Away (Chacun cherche son chat) (1996)|20-Jun-1997||http://us.imdb.com/M/title-exact?Chacun+cherche+son+chat+(1996)|0|0|0|0|0|1|0|0|0|0|0|0|0|0|1|0|0|0|0
257|Men in Black (1997)|04-Jul-1997||http://us.imdb.com/M/title-exact?Men+in+Black+(1997)|0|1|1|0|0|1|0|0|0|0|0|0|0|0|0|1|0|0|0
258|Contact (1997)|11-Jul-1997||http://us.imdb.com/Title?Contact+(1997/I)|0|0|0|0|0|0|0|0|1|0|0|0|0|0|0|1|0|0|0
259|George of the Jungle (1997)|01-Jan-1997||http://us.imdb.com/M/title-exact?George+of+the+Jungle+(1997)|0|0|0|0|1|1|0|0|0|0|0|0|0|0|0|0|0|0|0
260|Event Horizon (1997)|01-Jan-1997||http://us.imdb.com/M/title-exact?Event+Horizon+(1997)|0|1|0|0|0|0|0|0|0|0|0|0|0|1|0|1|1|0|0
261|Air Bud (1997)|01-Aug-1997||http://us.imdb.com/M/title-exact?Air+Bud+(1997)|0|0|0|0|1|1|0|0|0|0|0|0|0|0|0|0|0|0|0
262|In the Company of Men (1997)|01-Aug-1997||http://us.imdb.com/M/title-exact?In+the+Company+of+Men+(1997)|0|0|0|0|0|0|0|0|1|0|0|0|0|0|0|0|0|0|0
263|Steel (1997)|15-Aug-1997||http://us.imdb.com/M/title-exact?Steel+(1997)|0|1|0|0|0|0|0|0|0|0|0|0|0|0|0|0|0|0|0
264|Mimic (1997)|22-Aug-1997||http://us.imdb.com/M/title-exact?Mimic+(1997)|0|0|0|0|0|0|0|0|0|0|0|0|0|0|0|1|1|0|0
265|Hunt for Red October, The (1990)|01-Jan-1990||http://us.imdb.com/M/title-exact?Hunt+for+Red+October%2C+The+(1990)|0|1|0|0|0|0|0|0|0|0|0|0|0|0|0|0|1|0|0
266|Kull the Conqueror (1997)|29-Aug-1997||http://us.imdb.com/M/title-exact?Kull+the+Conqueror+(1997)|0|1|1|0|0|0|0|0|0|0|0|0|0|0|0|0|0|0|0
267|unknown||||1|0|0|0|0|0|0|0|0|0|0|0|0|0|0|0|0|0|0
268|Chasing Amy (1997)|01-Jan-1997||http://us.imdb.com/M/title-exact?Chasing+Amy+(1997)|0|0|0|0|0|0|0|0|1|0|0|0|0|0|1|0|0|0|0
269|Full Monty, The (1997)|01-Jan-1997||http://us.imdb.com/M/title-exact?Full+Monty%2C+The+(1997)|0|0|0|0|0|1|0|0|0|0|0|0|0|0|0|0|0|0|0
270|Gattaca (1997)|01-Jan-1997||http://us.imdb.com/M/title-exact?Gattaca+(1997)|0|0|0|0|0|0|0|0|1|0|0|0|0|0|0|1|1|0|0
271|Starship Troopers (1997)|01-Jan-1997||http://us.imdb.com/M/title-exact?Starship+Troopers+(1997)|0|1|1|0|0|0|0|0|0|0|0|0|0|0|0|1|0|1|0
272|Good Will Hunting (1997)|01-Jan-1997||http://us.imdb.com/M/title-exact?imdb-title-119217|0|0|0|0|0|0|0|0|1|0|0|0|0|0|0|0|0|0|0
273|Heat (1995)|01-Jan-1995||http://us.imdb.com/M/title-exact?Heat%20(1995)|0|1|0|0|0|0|1|0|0|0|0|0|0|0|0|0|1|0|0
274|Sabrina (1995)|01-Jan-1995||http://us.imdb.com/M/title-exact?Sabrina%20(1995)|0|0|0|0|0|1|0|0|0|0|0|0|0|0|1|0|0|0|0
275|Sense and Sensibility (1995)|01-Jan-1995||http://us.imdb.com/M/title-exact?Sense%20and%20Sensibility%20(1995)|0|0|0|0|0|0|0|0|1|0|0|0|0|0|1|0|0|0|0
276|Leaving Las Vegas (1995)|01-Jan-1995||http://us.imdb.com/M/title-exact?Leaving%20Las%20Vegas%20(1995)|0|0|0|0|0|0|0|0|1|0|0|0|0|0|1|0|0|0|0
277|Restoration (1995)|01-Jan-1995||http://us.imdb.com/M/title-exact?Restoration%20(1995)|0|0|0|0|0|0|0|0|1|0|0|0|0|0|0|0|0|0|0
278|Bed of Roses (1996)|01-Jan-1996||http://us.imdb.com/M/title-exact?Bed%20of%20Roses%20(1996)|0|0|0|0|0|0|0|0|1|0|0|0|0|0|1|0|0|0|0
279|Once Upon a Time... When We Were Colored (1995)|01-Jan-1995||http://us.imdb.com/M/title-exact?Once%20Upon%20a%20Time... When%20We%20Were%20Colored%20(1995)|0|0|0|0|0|0|0|0|1|0|0|0|0|0|0|0|0|0|0
280|Up Close and Personal (1996)|01-Mar-1996||http://us.imdb.com/M/title-exact?Up%20Close%20and%20Personal%20(1996)|0|0|0|0|0|0|0|0|1|0|0|0|0|0|1|0|0|0|0
281|River Wild, The (1994)|01-Jan-1994||http://us.imdb.com/M/title-exact?River%20Wild,%20The%20(1994)|0|1|0|0|0|0|0|0|0|0|0|0|0|0|0|0|1|0|0
282|Time to Kill, A (1996)|13-Jul-1996||http://us.imdb.com/M/title-exact?Time%20to%20Kill,%20A%20(1996)|0|0|0|0|0|0|0|0|1|0|0|0|0|0|0|0|0|0|0
283|Emma (1996)|02-Aug-1996||http://us.imdb.com/M/title-exact?Emma%20(1996)|0|0|0|0|0|0|0|0|1|0|0|0|0|0|1|0|0|0|0
284|Tin Cup (1996)|16-Aug-1996||http://us.imdb.com/M/title-exact?Tin%20Cup%20(1996)|0|0|0|0|0|1|0|0|0|0|0|0|0|0|1|0|0|0|0
285|Secrets & Lies (1996)|04-Oct-1996||http://us.imdb.com/M/title-exact?Secrets%20&%20Lies%20(1996)|0|0|0|0|0|0|0|0|1|0|0|0|0|0|0|0|0|0|0
286|English Patient, The (1996)|15-Nov-1996||http://us.imdb.com/M/title-exact?English%20Patient,%20The%20(1996)|0|0|0|0|0|0|0|0|1|0|0|0|0|0|1|0|0|1|0
287|Marvin's Room (1996)|18-Dec-1996||http://us.imdb.com/M/title-exact?Marvin's%20Room%20(1996)|0|0|0|0|0|0|0|0|1|0|0|0|0|0|0|0|0|0|0
288|Scream (1996)|20-Dec-1996||http://us.imdb.com/M/title-exact?Scream%20(1996)|0|0|0|0|0|0|0|0|0|0|0|1|0|0|0|0|1|0|0
289|Evita (1996)|25-Dec-1996||http://us.imdb.com/M/title-exact?Evita%20(1996)|0|0|0|0|0|0|0|0|1|0|0|0|1|0|0|0|0|0|0
290|Fierce Creatures (1997)|10-Jan-1997||http://us.imdb.com/M/title-exact?Fierce%20Creatures%20(1997)|0|0|0|0|0|1|0|0|0|0|0|0|0|0|0|0|0|0|0
291|Absolute Power (1997)|14-Feb-1997||http://us.imdb.com/M/title-exact?Absolute%20Power%20(1997)|0|0|0|0|0|0|0|0|0|0|0|0|0|1|0|0|1|0|0
292|Rosewood (1997)|21-Feb-1997||http://us.imdb.com/M/title-exact?Rosewood%20(1997)|0|0|0|0|0|0|0|0|1|0|0|0|0|0|0|0|0|0|0
293|Donnie Brasco (1997)|28-Feb-1997||http://us.imdb.com/M/title-exact?Donnie%20Brasco%20(1997)|0|0|0|0|0|0|1|0|1|0|0|0|0|0|0|0|0|0|0
294|Liar Liar (1997)|21-Mar-1997||http://us.imdb.com/Title?Liar+Liar+(1997)|0|0|0|0|0|1|0|0|0|0|0|0|0|0|0|0|0|0|0
295|Breakdown (1997)|02-May-1997||http://us.imdb.com/M/title-exact?Breakdown%20%281997%29|0|1|0|0|0|0|0|0|0|0|0|0|0|0|0|0|1|0|0
296|Promesse, La (1996)|16-May-1997||http://us.imdb.com/M/title-exact?Promesse%2C%20La%20%281996%29|0|0|0|0|0|0|0|0|1|0|0|0|0|0|0|0|0|0|0
297|Ulee's Gold (1997)|01-Jan-1997||http://us.imdb.com/M/title-exact?Ulee%27s+Gold+(1997)|0|0|0|0|0|0|0|0|1|0|0|0|0|0|0|0|0|0|0
298|Face/Off (1997)|27-Jun-1997||http://us.imdb.com/M/title-exact?Face/Off+(1997)|0|1|0|0|0|0|0|0|0|0|0|0|0|0|0|1|1|0|0
299|Hoodlum (1997)|22-Aug-1997||http://us.imdb.com/M/title-exact?Hoodlum+(1997)|0|0|0|0|0|0|1|0|1|0|1|0|0|0|0|0|0|0|0
300|Air Force One (1997)|01-Jan-1997||http://us.imdb.com/M/title-exact?Air+Force+One+(1997)|0|1|0|0|0|0|0|0|0|0|0|0|0|0|0|0|1|0|0
301|In & Out (1997)|19-Sep-1997||http://us.imdb.com/Title?In+%26+Out+(1997)|0|0|0|0|0|1|0|0|0|0|0|0|0|0|0|0|0|0|0
302|L.A. Confidential (1997)|01-Jan-1997||http://us.imdb.com/M/title-exact?L%2EA%2E+Confidential+(1997)|0|0|0|0|0|0|1|0|0|0|1|0|0|1|0|0|1|0|0
303|Ulee's Gold (1997)|01-Jan-1997||http://us.imdb.com/M/title-exact?Ulee%27s+Gold+(1997)|0|0|0|0|0|0|0|0|1|0|0|0|0|0|0|0|0|0|0
304|Fly Away Home (1996)|13-Sep-1996||http://us.imdb.com/M/title-exact?Fly%20Away%20Home%20(1996)|0|0|1|0|1|0|0|0|0|0|0|0|0|0|0|0|0|0|0
305|Ice Storm, The (1997)|01-Jan-1997||http://us.imdb.com/M/title-exact?Ice+Storm%2C+The+(1997)|0|0|0|0|0|0|0|0|1|0|0|0|0|0|0|0|0|0|0
306|Mrs. Brown (Her Majesty, Mrs. Brown) (1997)|01-Jan-1997||http://us.imdb.com/M/title-exact?Her+Majesty%2C+Mrs%2E+Brown+(1997)|0|0|0|0|0|0|0|0|1|0|0|0|0|0|1|0|0|0|0
307|Devil's Advocate, The (1997)|01-Jan-1997||http://us.imdb.com/M/title-exact?Devil's+Advocate,+The+(1997)|0|0|0|0|0|0|1|0|0|0|0|1|0|1|0|0|1|0|0
308|FairyTale: A True Story (1997)|01-Jan-1997||http://us.imdb.com/M/title-exact?Fairytale:+A+True+Story+(1997)|0|0|0|0|1|0|0|0|1|1|0|0|0|0|0|0|0|0|0
309|Deceiver (1997)|01-Jan-1997||http://us.imdb.com/M/title-exact?Liar+(1997)|0|0|0|0|0|0|1|0|0|0|0|0|0|0|0|0|0|0|0
310|Rainmaker, The (1997)|01-Jan-1997||http://us.imdb.com/M/title-exact?Rainmaker,+The+(1997)|0|0|0|0|0|0|0|0|1|0|0|0|0|0|0|0|0|0|0
311|Wings of the Dove, The (1997)|01-Jan-1997||http://us.imdb.com/M/title-exact?Wings+of+the+Dove%2C+The+(1997)|0|0|0|0|0|0|0|0|1|0|0|0|0|0|1|0|1|0|0
312|Midnight in the Garden of Good and Evil (1997)|01-Jan-1997||http://us.imdb.com/M/title-exact?Midnight+in+the+Garden+of+Good+and+Evil+(1997)|0|0|0|0|0|1|1|0|1|0|0|0|0|1|0|0|0|0|0
313|Titanic (1997)|01-Jan-1997||http://us.imdb.com/M/title-exact?imdb-title-120338|0|1|0|0|0|0|0|0|1|0|0|0|0|0|1|0|0|0|0
314|3 Ninjas: High Noon At Mega Mountain (1998)|01-Jan-1997||http://us.imdb.com/M/title-exact?imdb-title-118539|0|1|0|0|1|0|0|0|0|0|0|0|0|0|0|0|0|0|0
315|Apt Pupil (1998)|23-Oct-1998||http://us.imdb.com/Title?Apt+Pupil+(1998)|0|0|0|0|0|0|0|0|1|0|0|0|0|0|0|0|1|0|0
316|As Good As It Gets (1997)|23-Dec-1997||http://us.imdb.com/Title?As+Good+As+It+Gets+(1997)|0|0|0|0|0|1|0|0|1|0|0|0|0|0|0|0|0|0|0
317|In the Name of the Father (1993)|01-Jan-1993||http://us.imdb.com/M/title-exact?In%20the%20Name%20of%20the%20Father%20(1993)|0|0|0|0|0|0|0|0|1|0|0|0|0|0|0|0|0|0|0
318|Schindler's List (1993)|01-Jan-1993||http://us.imdb.com/M/title-exact?Schindler's%20List%20(1993)|0|0|0|0|0|0|0|0|1|0|0|0|0|0|0|0|0|1|0
319|Everyone Says I Love You (1996)|06-Dec-1996||http://us.imdb.com/M/title-exact?Everyone%20Says%20I%20Love%20You%20(1996)|0|0|0|0|0|1|0|0|0|0|0|0|1|0|1|0|0|0|0
320|Paradise Lost: The Child Murders at Robin Hood Hills (1996)|06-Dec-1996||http://us.imdb.com/M/title-exact?Paradise%20Lost%3a%20The%20Child%20Murders%20at%20Robin%20Hood%20Hills%20(1996)|0|0|0|0|0|0|0|1|0|0|0|0|0|0|0|0|0|0|0
321|Mother (1996)|25-Dec-1996||http://us.imdb.com/M/title-exact?Mother%20(1996/I)|0|0|0|0|0|1|0|0|0|0|0|0|0|0|0|0|0|0|0
322|Murder at 1600 (1997)|18-Apr-1997||http://us.imdb.com/M/title-exact?Murder%20at%201600%20(1997)|0|0|0|0|0|0|0|0|0|0|0|0|0|1|0|0|1|0|0
323|Dante's Peak (1997)|07-Feb-1997||http://us.imdb.com/M/title-exact?Dante's%20Peak%20(1997)|0|1|0|0|0|0|0|0|0|0|0|0|0|0|0|0|1|0|0
324|Lost Highway (1997)|21-Feb-1997||http://us.imdb.com/Title?Lost+Highway+(1997)|0|0|0|0|0|0|0|0|0|0|0|0|0|1|0|0|0|0|0
325|Crash (1996)|21-Mar-1997||http://us.imdb.com/M/title-exact?Crash%20(1996)|0|0|0|0|0|0|0|0|1|0|0|0|0|0|0|0|1|0|0
326|G.I. Jane (1997)|01-Jan-1997||http://us.imdb.com/M/title-exact?G%2EI%2E+Jane+(1997)|0|1|0|0|0|0|0|0|1|0|0|0|0|0|0|0|0|1|0
327|Cop Land (1997)|01-Jan-1997||http://us.imdb.com/M/title-exact?Cop+Land+(1997)|0|0|0|0|0|0|1|0|1|0|0|0|0|1|0|0|0|0|0
328|Conspiracy Theory (1997)|08-Aug-1997||http://us.imdb.com/M/title-exact?Conspiracy+Theory+(1997)|0|1|0|0|0|0|0|0|0|0|0|0|0|1|1|0|1|0|0
329|Desperate Measures (1998)|30-Jan-1998||http://us.imdb.com/Title?Desperate+Measures+(1998)|0|0|0|0|0|0|1|0|1|0|0|0|0|0|0|0|1|0|0
330|187 (1997)|01-Jan-1997||http://us.imdb.com/M/title-exact?187+(1997)|0|0|0|0|0|0|0|0|1|0|0|0|0|0|0|0|0|0|0
331|Edge, The (1997)|26-Sep-1997||http://us.imdb.com/M/title-exact?Edge%2C+The+(1997/I)|0|0|1|0|0|0|0|0|0|0|0|0|0|0|0|0|1|0|0
332|Kiss the Girls (1997)|01-Jan-1997||http://us.imdb.com/M/title-exact?Kiss+the+Girls+(1997)|0|0|0|0|0|0|1|0|1|0|0|0|0|0|0|0|1|0|0
333|Game, The (1997)|01-Jan-1997||http://us.imdb.com/M/title-exact?Game%2C+The+(1997)|0|0|0|0|0|0|0|0|0|0|0|0|0|1|0|0|1|0|0
334|U Turn (1997)|01-Jan-1997||http://us.imdb.com/Title?U+Turn+(1997)|0|1|0|0|0|0|1|0|0|0|0|0|0|1|0|0|0|0|0
335|How to Be a Player (1997)|01-Jan-1997||http://us.imdb.com/M/title-exact?How+to+Be+a+Player+(1997)|0|0|0|0|0|1|0|0|0|0|0|0|0|0|0|0|0|0|0
336|Playing God (1997)|01-Jan-1997||http://us.imdb.com/M/title-exact?Playing+God+(1997)|0|0|0|0|0|0|1|0|0|0|0|0|0|0|0|0|1|0|0
337|House of Yes, The (1997)|01-Jan-1997||http://us.imdb.com/M/title-exact?House+of+Yes,+The+(1997)|0|0|0|0|0|1|0|0|1|0|0|0|0|0|0|0|1|0|0
338|Bean (1997)|01-Jan-1997||http://us.imdb.com/M/title-exact?Bean+(1997)|0|0|0|0|0|1|0|0|0|0|0|0|0|0|0|0|0|0|0
339|Mad City (1997)|01-Jan-1997||http://us.imdb.com/M/title-exact?Mad+City+(1997)|0|1|0|0|0|0|0|0|1|0|0|0|0|0|0|0|0|0|0
340|Boogie Nights (1997)|01-Jan-1997||http://us.imdb.com/M/title-exact?Boogie+Nights+(1997)|0|0|0|0|0|0|0|0|1|0|0|0|0|0|0|0|0|0|0
341|Critical Care (1997)|01-Jan-1997||http://us.imdb.com/M/title-exact?Critical+Care+(1997)|0|0|0|0|0|1|0|0|0|0|0|0|0|0|0|0|0|0|0
342|Man Who Knew Too Little, The (1997)|01-Jan-1997||http://us.imdb.com/M/title-exact?Man+Who+Knew+Too+Little%2C+The+(1997)|0|0|0|0|0|1|0|0|0|0|0|0|0|1|0|0|0|0|0
343|Alien: Resurrection (1997)|01-Jan-1997||http://us.imdb.com/M/title-exact?Alien%3A+Resurrection+(1997)|0|1|0|0|0|0|0|0|0|0|0|1|0|0|0|1|0|0|0
344|Apostle, The (1997)|18-Dec-1997||http://us.imdb.com/M/title-exact?imdb-title-118632|0|0|0|0|0|0|0|0|1|0|0|0|0|0|0|0|0|0|0
345|Deconstructing Harry (1997)|01-Jan-1997||http://us.imdb.com/M/title-exact?imdb-title-118954|0|0|0|0|0|1|0|0|1|0|0|0|0|0|0|0|0|0|0
346|Jackie Brown (1997)|01-Jan-1997||http://us.imdb.com/M/title-exact?imdb-title-119396|0|0|0|0|0|0|1|0|1|0|0|0|0|0|0|0|0|0|0
347|Wag the Dog (1997)|09-Jan-1998||http://us.imdb.com/M/title-exact?imdb-title-120885|0|0|0|0|0|1|0|0|1|0|0|0|0|0|0|0|0|0|0
348|Desperate Measures (1998)|30-Jan-1998||http://us.imdb.com/Title?Desperate+Measures+(1998)|0|0|0|0|0|0|1|0|1|0|0|0|0|0|0|0|1|0|0
349|Hard Rain (1998)|16-Jan-1998||http://us.imdb.com/M/title-exact?imdb-title-120696|0|1|0|0|0|0|0|0|0|0|0|0|0|0|0|0|1|0|0
350|Fallen (1998)|16-Jan-1998||http://us.imdb.com/Title?Fallen+(1998)|0|1|0|0|0|0|0|0|0|0|0|0|0|1|0|0|1|0|0
351|Prophecy II, The (1998)|16-Jan-1998||http://us.imdb.com/M/title-exact?imdb-title-119959|0|0|0|0|0|0|0|0|0|0|0|1|0|0|0|0|0|0|0
352|Spice World (1997)|01-Jan-1997||http://us.imdb.com/M/title-exact?imdb-title-120185|0|0|0|0|0|1|0|0|0|0|0|0|1|0|0|0|0|0|0
353|Deep Rising (1998)|30-Jan-1998||http://us.imdb.com/M/title-exact?imdb-title-118956|0|1|0|0|0|0|0|0|0|0|0|1|0|0|0|1|0|0|0
354|Wedding Singer, The (1998)|13-Feb-1998||http://us.imdb.com/M/title-exact?Wedding+Singer%2C+The+(1998)|0|0|0|0|0|1|0|0|0|0|0|0|0|0|1|0|0|0|0
355|Sphere (1998)|13-Feb-1998||http://us.imdb.com/M/title-exact?Sphere+(1998)|0|0|1|0|0|0|0|0|0|0|0|0|0|0|0|1|1|0|0
356|Client, The (1994)|01-Jan-1994||http://us.imdb.com/M/title-exact?Client,%20The%20(1994)|0|0|0|0|0|0|0|0|1|0|0|0|0|1|0|0|1|0|0
357|One Flew Over the Cuckoo's Nest (1975)|01-Jan-1975||http://us.imdb.com/M/title-exact?One%20Flew%20Over%20the%20Cuckoo's%20Nest%20(1975)|0|0|0|0|0|0|0|0|1|0|0|0|0|0|0|0|0|0|0
358|Spawn (1997)|01-Aug-1997||http://us.imdb.com/M/title-exact?Spawn+(1997/I)|0|1|1|0|0|0|0|0|0|0|0|0|0|0|0|1|1|0|0
359|Assignment, The (1997)|01-Jan-1997||http://us.imdb.com/M/title-exact?Assignment%2C+The+(1997)|0|0|0|0|0|0|0|0|0|0|0|0|0|0|0|0|1|0|0
360|Wonderland (1997)|01-Jan-1997||http://us.imdb.com/M/title-exact?Wonderland+(1997)|0|0|0|0|0|0|0|1|0|0|0|0|0|0|0|0|0|0|0
361|Incognito (1997)|01-Jan-1997||http://us.imdb.com/M/title-exact?Incognito+(1997)|0|0|0|0|0|0|1|0|0|0|0|0|0|0|0|0|1|0|0
362|Blues Brothers 2000 (1998)|06-Feb-1998||http://us.imdb.com/M/title-exact?Blues+Brothers+2000+(1998)|0|1|0|0|0|1|0|0|0|0|0|0|1|0|0|0|0|0|0
363|Sudden Death (1995)|01-Jan-1995||http://us.imdb.com/M/title-exact?Sudden%20Death%20(1995)|0|1|0|0|0|0|0|0|0|0|0|0|0|0|0|0|0|0|0
364|Ace Ventura: When Nature Calls (1995)|01-Jan-1995||http://us.imdb.com/M/title-exact?Ace%20Ventura:%20When%20Nature%20Calls%20(1995)|0|0|0|0|0|1|0|0|0|0|0|0|0|0|0|0|0|0|0
365|Powder (1995)|01-Jan-1995||http://us.imdb.com/M/title-exact?Powder%20(1995)|0|0|0|0|0|0|0|0|1|0|0|0|0|0|0|0|0|0|0
366|Dangerous Minds (1995)|01-Jan-1995||http://us.imdb.com/M/title-exact?Dangerous%20Minds%20(1995)|0|0|0|0|0|0|0|0|1|0|0|0|0|0|0|0|0|0|0
367|Clueless (1995)|01-Jan-1995||http://us.imdb.com/M/title-exact?Clueless%20(1995)|0|0|0|0|0|1|0|0|0|0|0|0|0|0|0|0|0|0|0
368|Bio-Dome (1996)|01-Jan-1996||http://us.imdb.com/M/title-exact?Bio-Dome%20(1996)|0|0|0|0|0|1|0|0|0|0|0|0|0|0|0|0|0|0|0
369|Black Sheep (1996)|02-Feb-1996||http://us.imdb.com/M/title-exact?Black%20Sheep%20(1996)|0|0|0|0|0|1|0|0|0|0|0|0|0|0|0|0|0|0|0
370|Mary Reilly (1996)|23-Feb-1996||http://us.imdb.com/M/title-exact?Mary%20Reilly%20(1996)|0|0|0|0|0|0|0|0|1|0|0|0|0|0|0|0|1|0|0
371|Bridges of Madison County, The (1995)|09-Feb-1996||http://us.imdb.com/M/title-exact?Bridges%20of%20Madison%20County,%20The%20(1995)|0|0|0|0|0|0|0|0|1|0|0|0|0|0|1|0|0|0|0
372|Jeffrey (1995)|01-Jan-1995||http://us.imdb.com/M/title-exact?Jeffrey%20(1995)|0|0|0|0|0|1|0|0|0|0|0|0|0|0|0|0|0|0|0
373|Judge Dredd (1995)|01-Jan-1995||http://us.imdb.com/M/title-exact?Judge%20Dredd%20(1995)|0|1|1|0|0|0|0|0|0|0|0|0|0|0|0|1|0|0|0
374|Mighty Morphin Power Rangers: The Movie (1995)|01-Jan-1995||http://us.imdb.com/M/title-exact?Mighty%20Morphin%20Power%20Rangers:%20The%20Movie%20(1995)|0|1|0|0|1|0|0|0|0|0|0|0|0|0|0|0|0|0|0
375|Showgirls (1995)|01-Jan-1995||http://us.imdb.com/M/title-exact?Showgirls%20(1995)|0|0|0|0|0|0|0|0|1|0|0|0|0|0|0|0|0|0|0
376|Houseguest (1994)|01-Jan-1994||http://us.imdb.com/M/title-exact?Houseguest%20(1994)|0|0|0|0|0|1|0|0|0|0|0|0|0|0|0|0|0|0|0
377|Heavyweights (1994)|01-Jan-1994||http://us.imdb.com/M/title-exact?Heavyweights%20(1994)|0|0|0|0|1|1|0|0|0|0|0|0|0|0|0|0|0|0|0
378|Miracle on 34th Street (1994)|01-Jan-1994||http://us.imdb.com/M/title-exact?Miracle%20on%2034th%20Street%20(1994)|0|0|0|0|0|0|0|0|1|0|0|0|0|0|0|0|0|0|0
379|Tales From the Crypt Presents: Demon Knight (1995)|01-Jan-1995||http://us.imdb.com/M/title-exact?Tales%20From%20the%20Crypt%20Presents:%20Demon%20Knight%20(1995)|0|0|0|0|0|0|0|0|0|0|0|1|0|0|0|0|0|0|0
380|Star Trek: Generations (1994)|01-Jan-1994||http://us.imdb.com/M/title-exact?Star%20Trek:%20Generations%20(1994)|0|1|1|0|0|0|0|0|0|0|0|0|0|0|0|1|0|0|0
381|Muriel's Wedding (1994)|01-Jan-1994||http://us.imdb.com/M/title-exact?Muriel's%20Wedding%20(1994)|0|0|0|0|0|1|0|0|0|0|0|0|0|0|1|0|0|0|0
382|Adventures of Priscilla, Queen of the Desert, The (1994)|01-Jan-1994||http://us.imdb.com/M/title-exact?Adventures%20of%20Priscilla,%20Queen%20of%20the%20Desert,%20The%20(1994)|0|0|0|0|0|1|0|0|1|0|0|0|0|0|0|0|0|0|0
383|Flintstones, The (1994)|01-Jan-1994||http://us.imdb.com/M/title-exact?Flintstones,%20The%20(1994)|0|0|0|0|1|1|0|0|0|0|0|0|0|0|0|0|0|0|0
384|Naked Gun 33 1/3: The Final Insult (1994)|01-Jan-1994||http://us.imdb.com/M/title-exact?Naked%20Gun%2033%201/3:%20The%20Final%20Insult%20(1994)|0|0|0|0|0|1|0|0|0|0|0|0|0|0|0|0|0|0|0
385|True Lies (1994)|01-Jan-1994||http://us.imdb.com/M/title-exact?True%20Lies%20(1994)|0|1|1|0|0|1|0|0|0|0|0|0|0|0|1|0|0|0|0
386|Addams Family Values (1993)|01-Jan-1993||http://us.imdb.com/M/title-exact?Addams%20Family%20Values%20(1993)|0|0|0|0|0|1|0|0|0|0|0|0|0|0|0|0|0|0|0
387|Age of Innocence, The (1993)|01-Jan-1993||http://us.imdb.com/M/title-exact?Age%20of%20Innocence,%20The%20(1993)|0|0|0|0|0|0|0|0|1|0|0|0|0|0|0|0|0|0|0
388|Beverly Hills Cop III (1994)|01-Jan-1994||http://us.imdb.com/M/title-exact?Beverly%20Hills%20Cop%20III%20(1994)|0|1|0|0|0|1|0|0|0|0|0|0|0|0|0|0|0|0|0
389|Black Beauty (1994)|01-Jan-1994||http://us.imdb.com/Title?Black+Beauty+(1994/I)|0|0|1|0|1|0|0|0|0|0|0|0|0|0|0|0|0|0|0
390|Fear of a Black Hat (1993)|01-Jan-1993||http://us.imdb.com/M/title-exact?Fear%20of%20a%20Black%20Hat%20(1993)|0|0|0|0|0|1|0|0|0|0|0|0|0|0|0|0|0|0|0
391|Last Action Hero (1993)|01-Jan-1993||http://us.imdb.com/M/title-exact?Last%20Action%20Hero%20(1993)|0|1|0|0|0|1|0|0|0|0|0|0|0|0|0|0|0|0|0
392|Man Without a Face, The (1993)|01-Jan-1993||http://us.imdb.com/M/title-exact?Man%20Without%20a%20Face,%20The%20(1993)|0|0|0|0|0|0|0|0|1|0|0|0|0|0|0|0|0|0|0
393|Mrs. Doubtfire (1993)|01-Jan-1993||http://us.imdb.com/M/title-exact?Mrs.%20Doubtfire%20(1993)|0|0|0|0|0|1|0|0|0|0|0|0|0|0|0|0|0|0|0
394|Radioland Murders (1994)|01-Jan-1994||http://us.imdb.com/M/title-exact?Radioland%20Murders%20(1994)|0|0|0|0|0|1|0|0|0|0|0|0|0|1|1|0|0|0|0
395|Robin Hood: Men in Tights (1993)|01-Jan-1993||http://us.imdb.com/M/title-exact?Robin%20Hood:%20Men%20in%20Tights%20(1993)|0|0|0|0|0|1|0|0|0|0|0|0|0|0|0|0|0|0|0
396|Serial Mom (1994)|01-Jan-1994||http://us.imdb.com/M/title-exact?Serial%20Mom%20(1994)|0|0|0|0|0|1|1|0|0|0|0|1|0|0|0|0|0|0|0
397|Striking Distance (1993)|01-Jan-1993||http://us.imdb.com/M/title-exact?Striking%20Distance%20(1993)|0|1|0|0|0|0|0|0|0|0|0|0|0|0|0|0|0|0|0
398|Super Mario Bros. (1993)|01-Jan-1993||http://us.imdb.com/M/title-exact?Super%20Mario%20Bros.%20(1993)|0|1|1|0|1|0|0|0|0|0|0|0|0|0|0|1|0|0|0
399|Three Musketeers, The (1993)|01-Jan-1993||http://us.imdb.com/M/title-exact?Three%20Musketeers,%20The%20(1993)|0|1|1|0|0|1|0|0|0|0|0|0|0|0|0|0|0|0|0
400|Little Rascals, The (1994)|01-Jan-1994||http://us.imdb.com/M/title-exact?Little%20Rascals,%20The%20(1994)|0|0|0|0|1|1|0|0|0|0|0|0|0|0|0|0|0|0|0
401|Brady Bunch Movie, The (1995)|01-Jan-1995||http://us.imdb.com/M/title-exact?Brady%20Bunch%20Movie,%20The%20(1995)|0|0|0|0|0|1|0|0|0|0|0|0|0|0|0|0|0|0|0
402|Ghost (1990)|01-Jan-1990||http://us.imdb.com/M/title-exact?Ghost%20(1990)|0|0|0|0|0|1|0|0|0|0|0|0|0|0|1|0|1|0|0
403|Batman (1989)|01-Jan-1989||http://us.imdb.com/M/title-exact?Batman%20(1989)|0|1|1|0|0|0|1|0|1|0|0|0|0|0|0|0|0|0|0
404|Pinocchio (1940)|01-Jan-1940||http://us.imdb.com/M/title-exact?Pinocchio%20(1940)|0|0|0|1|1|0|0|0|0|0|0|0|0|0|0|0|0|0|0
405|Mission: Impossible (1996)|22-May-1996||http://us.imdb.com/M/title-exact?Mission:%20Impossible%20(1996)|0|1|1|0|0|0|0|0|0|0|0|0|0|1|0|0|0|0|0
406|Thinner (1996)|25-Oct-1996||http://us.imdb.com/M/title-exact?Thinner%20(1996)|0|0|0|0|0|0|0|0|0|0|0|1|0|0|0|0|1|0|0
407|Spy Hard (1996)|24-May-1996||http://us.imdb.com/M/title-exact?Spy%20Hard%20(1996)|0|0|0|0|0|1|0|0|0|0|0|0|0|0|0|0|0|0|0
408|Close Shave, A (1995)|28-Apr-1996||http://us.imdb.com/M/title-exact?Close%20Shave,%20A%20(1995)|0|0|0|1|0|1|0|0|0|0|0|0|0|0|0|0|1|0|0
409|Jack (1996)|07-Aug-1996||http://us.imdb.com/M/title-exact?Jack%20(1996)|0|0|0|0|0|1|0|0|1|0|0|0|0|0|0|0|0|0|0
410|Kingpin (1996)|12-Jul-1996||http://us.imdb.com/M/title-exact?Kingpin%20(1996)|0|0|0|0|0|1|0|0|0|0|0|0|0|0|0|0|0|0|0
411|Nutty Professor, The (1996)|28-Jun-1996||http://us.imdb.com/M/title-exact?Nutty%20Professor,%20The%20(1996)|0|0|0|0|0|1|0|0|0|1|0|0|0|0|1|1|0|0|0
412|Very Brady Sequel, A (1996)|23-Aug-1996||http://us.imdb.com/M/title-exact?Very%20Brady%20Sequel,%20A%20(1996)|0|0|0|0|0|1|0|0|0|0|0|0|0|0|0|0|0|0|0
413|Tales from the Crypt Presents: Bordello of Blood (1996)|19-Jul-1996||http://us.imdb.com/M/title-exact?Tales%20from%20the%20Crypt%20Presents:%20Bordello%20of%20Blood%20(1996)|0|0|0|0|0|0|0|0|0|0|0|1|0|0|0|0|0|0|0
414|My Favorite Year (1982)|01-Jan-1982||http://us.imdb.com/M/title-exact?My%20Favorite%20Year%20(1982)|0|0|0|0|0|1|0|0|0|0|0|0|0|0|0|0|0|0|0
415|Apple Dumpling Gang, The (1975)|01-Jan-1975||http://us.imdb.com/M/title-exact?Apple%20Dumpling%20Gang,%20The%20(1975)|0|0|0|0|1|1|0|0|0|0|0|0|0|0|0|0|0|0|1
416|Old Yeller (1957)|01-Jan-1957||http://us.imdb.com/M/title-exact?Old%20Yeller%20(1957)|0|0|0|0|1|0|0|0|1|0|0|0|0|0|0|0|0|0|0
417|Parent Trap, The (1961)|01-Jan-1961||http://us.imdb.com/M/title-exact?Parent%20Trap,%20The%20(1961)|0|0|0|0|1|0|0|0|1|0|0|0|0|0|0|0|0|0|0
418|Cinderella (1950)|01-Jan-1950||http://us.imdb.com/M/title-exact?Cinderella%20(1950)|0|0|0|1|1|0|0|0|0|0|0|0|1|0|0|0|0|0|0
419|Mary Poppins (1964)|01-Jan-1964||http://us.imdb.com/M/title-exact?Mary%20Poppins%20(1964)|0|0|0|0|1|1|0|0|0|0|0|0|1|0|0|0|0|0|0
420|Alice in Wonderland (1951)|01-Jan-1951||http://us.imdb.com/M/title-exact?Alice%20in%20Wonderland%20(1951)|0|0|0|1|1|0|0|0|0|0|0|0|1|0|0|0|0|0|0
421|William Shakespeare's Romeo and Juliet (1996)|25-Oct-1996||http://us.imdb.com/Title?Romeo+%2B+Juliet+(1996)|0|0|0|0|0|0|0|0|1|0|0|0|0|0|1|0|0|0|0
422|Aladdin and the King of Thieves (1996)|01-Jan-1996||http://us.imdb.com/M/title-exact?Aladdin%20and%20the%20King%20of%20Thieves%20(1996)%20(V)|0|0|0|1|1|1|0|0|0|0|0|0|0|0|0|0|0|0|0
423|E.T. the Extra-Terrestrial (1982)|01-Jan-1982||http://us.imdb.com/M/title-exact?E%2ET%2E%20the%20Extra-Terrestrial%20%281982%29|0|0|0|0|1|0|0|0|1|1|0|0|0|0|0|1|0|0|0
424|Children of the Corn: The Gathering (1996)|01-Jan-1996||http://us.imdb.com/M/title-exact?Children%20of%20the%20Corn%3A%20The%20Gathering%20%281996%29|0|0|0|0|0|0|0|0|0|0|0|1|0|0|0|0|0|0|0
425|Bob Roberts (1992)|01-Jan-1992||http://us.imdb.com/M/title-exact?Bob%20Roberts%20(1992)|0|0|0|0|0|1|0|0|0|0|0|0|0|0|0|0|0|0|0
426|Transformers: The Movie, The (1986)|01-Jan-1986||http://us.imdb.com/M/title-exact?Transformers:%20The%20Movie,%20The%20(1986)|0|1|0|1|1|0|0|0|0|0|0|0|0|0|0|1|1|1|0
427|To Kill a Mockingbird (1962)|01-Jan-1962||http://us.imdb.com/M/title-exact?To%20Kill%20a%20Mockingbird%20(1962)|0|0|0|0|0|0|0|0|1|0|0|0|0|0|0|0|0|0|0
428|Harold and Maude (1971)|01-Jan-1971||http://us.imdb.com/M/title-exact?Harold%20and%20Maude%20(1971)|0|0|0|0|0|1|0|0|0|0|0|0|0|0|0|0|0|0|0
429|Day the Earth Stood Still, The (1951)|01-Jan-1951||http://us.imdb.com/M/title-exact?Day%20the%20Earth%20Stood%20Still,%20The%20(1951)|0|0|0|0|0|0|0|0|1|0|0|0|0|0|0|1|0|0|0
430|Duck Soup (1933)|01-Jan-1933||http://us.imdb.com/M/title-exact?Duck%20Soup%20(1933)|0|0|0|0|0|1|0|0|0|0|0|0|0|0|0|0|0|1|0
431|Highlander (1986)|01-Jan-1986||http://us.imdb.com/M/title-exact?Highlander%20(1986)|0|1|1|0|0|0|0|0|0|0|0|0|0|0|0|0|0|0|0
432|Fantasia (1940)|01-Jan-1940||http://us.imdb.com/M/title-exact?Fantasia%20(1940)|0|0|0|1|1|0|0|0|0|0|0|0|1|0|0|0|0|0|0
433|Heathers (1989)|01-Jan-1989||http://us.imdb.com/M/title-exact?Heathers%20(1989)|0|0|0|0|0|1|0|0|0|0|0|0|0|0|0|0|0|0|0
434|Forbidden Planet (1956)|01-Jan-1956||http://us.imdb.com/M/title-exact?Forbidden%20Planet%20(1956)|0|0|0|0|0|0|0|0|0|0|0|0|0|0|0|1|0|0|0
435|Butch Cassidy and the Sundance Kid (1969)|01-Jan-1969||http://us.imdb.com/M/title-exact?Butch%20Cassidy%20and%20the%20Sundance%20Kid%20(1969)|0|1|0|0|0|1|0|0|0|0|0|0|0|0|0|0|0|0|1
436|American Werewolf in London, An (1981)|01-Jan-1981||http://us.imdb.com/M/title-exact?American%20Werewolf%20in%20London,%20An%20(1981)|0|0|0|0|0|0|0|0|0|0|0|1|0|0|0|0|0|0|0
437|Amityville 1992: It's About Time (1992)|01-Jan-1992||http://us.imdb.com/M/title-exact?Amityville%201992:%20It's%20About%20Time%20(1992)|0|0|0|0|0|0|0|0|0|0|0|1|0|0|0|0|0|0|0
438|Amityville 3-D (1983)|01-Jan-1983||http://us.imdb.com/M/title-exact?Amityville%203-D%20(1983)|0|0|0|0|0|0|0|0|0|0|0|1|0|0|0|0|0|0|0
439|Amityville: A New Generation (1993)|01-Jan-1993||http://us.imdb.com/M/title-exact?Amityville:%20A%20New%20Generation%20(1993)|0|0|0|0|0|0|0|0|0|0|0|1|0|0|0|0|0|0|0
440|Amityville II: The Possession (1982)|01-Jan-1982||http://us.imdb.com/M/title-exact?Amityville%20II:%20The%20Possession%20(1982)|0|0|0|0|0|0|0|0|0|0|0|1|0|0|0|0|0|0|0
441|Amityville Horror, The (1979)|01-Jan-1979||http://us.imdb.com/M/title-exact?Amityville%20Horror,%20The%20(1979)|0|0|0|0|0|0|0|0|0|0|0|1|0|0|0|0|0|0|0
442|Amityville Curse, The (1990)|01-Jan-1990||http://us.imdb.com/M/title-exact?Amityville%20Curse,%20The%20(1990)|0|0|0|0|0|0|0|0|0|0|0|1|0|0|0|0|0|0|0
443|Birds, The (1963)|01-Jan-1963||http://us.imdb.com/M/title-exact?Birds,%20The%20(1963)|0|0|0|0|0|0|0|0|0|0|0|1|0|0|0|0|0|0|0
444|Blob, The (1958)|01-Jan-1958||http://us.imdb.com/M/title-exact?Blob,%20The%20(1958)|0|0|0|0|0|0|0|0|0|0|0|1|0|0|0|1|0|0|0
445|Body Snatcher, The (1945)|01-Jan-1945||http://us.imdb.com/M/title-exact?Body%20Snatcher,%20The%20(1945)|0|0|0|0|0|0|0|0|0|0|0|1|0|0|0|0|0|0|0
446|Burnt Offerings (1976)|01-Jan-1976||http://us.imdb.com/M/title-exact?Burnt%20Offerings%20(1976)|0|0|0|0|0|0|0|0|0|0|0|1|0|0|0|0|0|0|0
447|Carrie (1976)|01-Jan-1976||http://us.imdb.com/M/title-exact?Carrie%20(1976)|0|0|0|0|0|0|0|0|0|0|0|1|0|0|0|0|0|0|0
448|Omen, The (1976)|01-Jan-1976||http://us.imdb.com/M/title-exact?Omen,%20The%20(1976)|0|0|0|0|0|0|0|0|0|0|0|1|0|0|0|0|0|0|0
449|Star Trek: The Motion Picture (1979)|01-Jan-1979||http://us.imdb.com/M/title-exact?Star%20Trek:%20The%20Motion%20Picture%20(1979)|0|1|1|0|0|0|0|0|0|0|0|0|0|0|0|1|0|0|0
450|Star Trek V: The Final Frontier (1989)|01-Jan-1989||http://us.imdb.com/M/title-exact?Star%20Trek%20V:%20The%20Final%20Frontier%20(1989)|0|1|1|0|0|0|0|0|0|0|0|0|0|0|0|1|0|0|0
451|Grease (1978)|01-Jan-1978||http://us.imdb.com/M/title-exact?Grease%20(1978)|0|0|0|0|0|1|0|0|0|0|0|0|1|0|1|0|0|0|0
452|Jaws 2 (1978)|01-Jan-1978||http://us.imdb.com/M/title-exact?Jaws%202%20(1978)|0|1|0|0|0|0|0|0|0|0|0|1|0|0|0|0|0|0|0
453|Jaws 3-D (1983)|01-Jan-1983||http://us.imdb.com/M/title-exact?Jaws%203-D%20(1983)|0|1|0|0|0|0|0|0|0|0|0|1|0|0|0|0|0|0|0
454|Bastard Out of Carolina (1996)|15-Dec-1996||http://us.imdb.com/M/title-exact?Bastard%20Out%20of%20Carolina%20(1996)|0|0|0|0|0|0|0|0|1|0|0|0|0|0|0|0|0|0|0
455|Jackie Chan's First Strike (1996)|10-Jan-1997||http://us.imdb.com/M/title-exact?Police%20Story%204:%20First%20Strike%20(1996)|0|1|0|0|0|0|0|0|0|0|0|0|0|0|0|0|0|0|0
456|Beverly Hills Ninja (1997)|17-Jan-1997||http://us.imdb.com/M/title-exact?Beverly%20Hills%20Ninja%20(1997)|0|1|0|0|0|1|0|0|0|0|0|0|0|0|0|0|0|0|0
457|Free Willy 3: The Rescue (1997)|08-Aug-1997||http://us.imdb.com/M/title-exact?Free+Willy+3%3A+The+Rescue+(1997)|0|0|1|0|1|0|0|0|1|0|0|0|0|0|0|0|0|0|0
458|Nixon (1995)|01-Jan-1995||http://us.imdb.com/M/title-exact?Nixon%20(1995)|0|0|0|0|0|0|0|0|1|0|0|0|0|0|0|0|0|0|0
459|Cry, the Beloved Country (1995)|01-Jan-1995||http://us.imdb.com/M/title-exact?Cry,%20the%20Beloved%20Country%20(1995)|0|0|0|0|0|0|0|0|1|0|0|0|0|0|0|0|0|0|0
460|Crossing Guard, The (1995)|01-Jan-1995||http://us.imdb.com/M/title-exact?Crossing%20Guard,%20The%20(1995)|0|0|0|0|0|0|0|0|1|0|0|0|0|0|0|0|0|0|0
461|Smoke (1995)|01-Jan-1995||http://us.imdb.com/M/title-exact?Smoke%20(1995)|0|0|0|0|0|0|0|0|1|0|0|0|0|0|0|0|0|0|0
462|Like Water For Chocolate (Como agua para chocolate) (1992)|01-Jan-1992||http://us.imdb.com/M/title-exact?Como%20agua%20para%20chocolate%20(1992)|0|0|0|0|0|0|0|0|1|0|0|0|0|0|1|0|0|0|0
463|Secret of Roan Inish, The (1994)|01-Jan-1994||http://us.imdb.com/M/title-exact?Secret%20of%20Roan%20Inish,%20The%20(1994)|0|0|1|0|0|0|0|0|0|0|0|0|0|0|0|0|0|0|0
464|Vanya on 42nd Street (1994)|01-Jan-1994||http://us.imdb.com/M/title-exact?Vanya%20on%2042nd%20Street%20(1994)|0|0|0|0|0|0|0|0|1|0|0|0|0|0|0|0|0|0|0
465|Jungle Book, The (1994)|01-Jan-1994||http://us.imdb.com/M/title-exact?Jungle%20Book,%20The%20(1994)|0|0|1|0|1|0|0|0|0|0|0|0|0|0|1|0|0|0|0
466|Red Rock West (1992)|01-Jan-1992||http://us.imdb.com/M/title-exact?Red%20Rock%20West%20(1992)|0|0|0|0|0|0|0|0|0|0|0|0|0|0|0|0|1|0|0
467|Bronx Tale, A (1993)|01-Jan-1993||http://us.imdb.com/M/title-exact?Bronx%20Tale,%20A%20(1993)|0|0|0|0|0|0|0|0|1|0|0|0|0|0|0|0|0|0|0
468|Rudy (1993)|01-Jan-1993||http://us.imdb.com/M/title-exact?Rudy%20(1993)|0|0|0|0|0|0|0|0|1|0|0|0|0|0|0|0|0|0|0
469|Short Cuts (1993)|01-Jan-1993||http://us.imdb.com/M/title-exact?Short%20Cuts%20(1993)|0|0|0|0|0|0|0|0|1|0|0|0|0|0|0|0|0|0|0
470|Tombstone (1993)|01-Jan-1993||http://us.imdb.com/M/title-exact?Tombstone%20(1993)|0|0|0|0|0|0|0|0|0|0|0|0|0|0|0|0|0|0|1
471|Courage Under Fire (1996)|08-Mar-1996||http://us.imdb.com/M/title-exact?Courage%20Under%20Fire%20(1996)|0|0|0|0|0|0|0|0|1|0|0|0|0|0|0|0|0|1|0
472|Dragonheart (1996)|31-May-1996||http://us.imdb.com/M/title-exact?Dragonheart%20(1996)|0|1|1|0|0|0|0|0|0|1|0|0|0|0|0|0|0|0|0
473|James and the Giant Peach (1996)|12-Apr-1996||http://us.imdb.com/M/title-exact?James%20and%20the%20Giant%20Peach%20(1996)|0|0|0|1|1|0|0|0|0|0|0|0|1|0|0|0|0|0|0
474|Dr. Strangelove or: How I Learned to Stop Worrying and Love the Bomb (1963)|01-Jan-1963||http://us.imdb.com/M/title-exact?Dr.%20Strangelove%20or:%20How%20I%20Learned%20to%20Stop%20Worrying%20and%20Love%20the%20Bomb%20(1963)|0|0|0|0|0|0|0|0|0|0|0|0|0|0|0|1|0|1|0
475|Trainspotting (1996)|19-Jul-1996||http://us.imdb.com/Title?Trainspotting+(1996)|0|0|0|0|0|0|0|0|1|0|0|0|0|0|0|0|0|0|0
476|First Wives Club, The (1996)|14-Sep-1996||http://us.imdb.com/M/title-exact?First%20Wives%20Club,%20The%20(1996)|0|0|0|0|0|1|0|0|0|0|0|0|0|0|0|0|0|0|0
477|Matilda (1996)|02-Aug-1996||http://us.imdb.com/M/title-exact?Matilda%20(1996)|0|0|0|0|1|1|0|0|0|0|0|0|0|0|0|0|0|0|0
478|Philadelphia Story, The (1940)|01-Jan-1940||http://us.imdb.com/M/title-exact?Philadelphia%20Story,%20The%20(1940)|0|0|0|0|0|1|0|0|0|0|0|0|0|0|1|0|0|0|0
479|Vertigo (1958)|01-Jan-1958||http://us.imdb.com/M/title-exact?Vertigo%20(1958)|0|0|0|0|0|0|0|0|0|0|0|0|0|1|0|0|1|0|0
480|North by Northwest (1959)|01-Jan-1959||http://us.imdb.com/M/title-exact?North%20by%20Northwest%20(1959)|0|0|0|0|0|1|0|0|0|0|0|0|0|0|0|0|1|0|0
481|Apartment, The (1960)|01-Jan-1960||http://us.imdb.com/M/title-exact?Apartment,%20The%20(1960)|0|0|0|0|0|1|0|0|1|0|0|0|0|0|0|0|0|0|0
482|Some Like It Hot (1959)|01-Jan-1959||http://us.imdb.com/M/title-exact?Some%20Like%20It%20Hot%20(1959)|0|0|0|0|0|1|1|0|0|0|0|0|0|0|0|0|0|0|0
483|Casablanca (1942)|01-Jan-1942||http://us.imdb.com/M/title-exact?Casablanca%20(1942)|0|0|0|0|0|0|0|0|1|0|0|0|0|0|1|0|0|1|0
484|Maltese Falcon, The (1941)|01-Jan-1941||http://us.imdb.com/M/title-exact?Maltese%20Falcon,%20The%20(1941)|0|0|0|0|0|0|0|0|0|0|1|0|0|1|0|0|0|0|0
485|My Fair Lady (1964)|01-Jan-1964||http://us.imdb.com/M/title-exact?My%20Fair%20Lady%20(1964)|0|0|0|0|0|0|0|0|0|0|0|0|1|0|1|0|0|0|0
486|Sabrina (1954)|01-Jan-1954||http://us.imdb.com/M/title-exact?Sabrina%20(1954)|0|0|0|0|0|1|0|0|0|0|0|0|0|0|1|0|0|0|0
487|Roman Holiday (1953)|01-Jan-1953||http://us.imdb.com/M/title-exact?Roman%20Holiday%20(1953)|0|0|0|0|0|1|0|0|0|0|0|0|0|0|1|0|0|0|0
488|Sunset Blvd. (1950)|01-Jan-1950||http://us.imdb.com/M/title-exact?Sunset%20Boulevard%20(1950)|0|0|0|0|0|0|0|0|0|0|1|0|0|0|0|0|0|0|0
489|Notorious (1946)|01-Jan-1946||http://us.imdb.com/M/title-exact?Notorious%20(1946)|0|0|0|0|0|0|0|0|0|0|1|0|0|0|1|0|1|0|0
490|To Catch a Thief (1955)|01-Jan-1955||http://us.imdb.com/M/title-exact?To%20Catch%20a%20Thief%20(1955)|0|0|0|0|0|1|0|0|0|0|0|0|0|0|1|0|1|0|0
491|Adventures of Robin Hood, The (1938)|01-Jan-1938||http://us.imdb.com/M/title-exact?Adventures%20of%20Robin%20Hood,%20The%20(1938)|0|1|1|0|0|0|0|0|0|0|0|0|0|0|0|0|0|0|0
492|East of Eden (1955)|01-Jan-1955||http://us.imdb.com/M/title-exact?East%20of%20Eden%20(1955)|0|0|0|0|0|0|0|0|1|0|0|0|0|0|0|0|0|0|0
493|Thin Man, The (1934)|01-Jan-1934||http://us.imdb.com/M/title-exact?Thin%20Man,%20The%20(1934)|0|0|0|0|0|0|0|0|0|0|0|0|0|1|0|0|0|0|0
494|His Girl Friday (1940)|01-Jan-1940||http://us.imdb.com/M/title-exact?His%20Girl%20Friday%20(1940)|0|0|0|0|0|1|0|0|0|0|0|0|0|0|0|0|0|0|0
495|Around the World in 80 Days (1956)|01-Jan-1956||http://us.imdb.com/M/title-exact?Around%20the%20World%20in%2080%20Days%20(1956)|0|0|1|0|0|1|0|0|0|0|0|0|0|0|0|0|0|0|0
496|It's a Wonderful Life (1946)|01-Jan-1946||http://us.imdb.com/M/title-exact?It's%20a%20Wonderful%20Life%20(1946)|0|0|0|0|0|0|0|0|1|0|0|0|0|0|0|0|0|0|0
497|Bringing Up Baby (1938)|01-Jan-1938||http://us.imdb.com/M/title-exact?Bringing%20Up%20Baby%20(1938)|0|0|0|0|0|1|0|0|0|0|0|0|0|0|0|0|0|0|0
498|African Queen, The (1951)|01-Jan-1951||http://us.imdb.com/M/title-exact?African%20Queen,%20The%20(1951)|0|1|1|0|0|0|0|0|0|0|0|0|0|0|1|0|0|1|0
499|Cat on a Hot Tin Roof (1958)|01-Jan-1958||http://us.imdb.com/M/title-exact?Cat%20on%20a%20Hot%20Tin%20Roof%20(1958)|0|0|0|0|0|0|0|0|1|0|0|0|0|0|0|0|0|0|0
500|Fly Away Home (1996)|13-Sep-1996||http://us.imdb.com/M/title-exact?Fly%20Away%20Home%20(1996)|0|0|1|0|1|0|0|0|0|0|0|0|0|0|0|0|0|0|0
501|Dumbo (1941)|01-Jan-1941||http://us.imdb.com/M/title-exact?Dumbo%20(1941)|0|0|0|1|1|0|0|0|0|0|0|0|1|0|0|0|0|0|0
502|Bananas (1971)|01-Jan-1971||http://us.imdb.com/M/title-exact?Bananas%20(1971)|0|0|0|0|0|1|0|0|0|0|0|0|0|0|0|0|0|1|0
503|Candidate, The (1972)|01-Jan-1972||http://us.imdb.com/M/title-exact?Candidate,%20The%20(1972)|0|0|0|0|0|0|0|0|1|0|0|0|0|0|0|0|0|0|0
504|Bonnie and Clyde (1967)|01-Jan-1967||http://us.imdb.com/M/title-exact?Bonnie%20and%20Clyde%20(1967)|0|0|0|0|0|0|1|0|1|0|0|0|0|0|0|0|0|0|0
505|Dial M for Murder (1954)|01-Jan-1954||http://us.imdb.com/M/title-exact?Dial%20M%20for%20Murder%20(1954)|0|0|0|0|0|0|0|0|0|0|0|0|0|1|0|0|1|0|0
506|Rebel Without a Cause (1955)|01-Jan-1955||http://us.imdb.com/M/title-exact?Rebel%20Without%20a%20Cause%20(1955)|0|0|0|0|0|0|0|0|1|0|0|0|0|0|0|0|0|0|0
507|Streetcar Named Desire, A (1951)|01-Jan-1951||http://us.imdb.com/M/title-exact?Streetcar%20Named%20Desire,%20A%20(1951)|0|0|0|0|0|0|0|0|1|0|0|0|0|0|0|0|0|0|0
508|People vs. Larry Flynt, The (1996)|27-Dec-1996||http://us.imdb.com/M/title-exact?People%20vs.%20Larry%20Flynt,%20The%20(1996)|0|0|0|0|0|0|0|0|1|0|0|0|0|0|0|0|0|0|0
509|My Left Foot (1989)|01-Jan-1989||http://us.imdb.com/M/title-exact?My%20Left%20Foot%20(1989)|0|0|0|0|0|0|0|0|1|0|0|0|0|0|0|0|0|0|0
510|Magnificent Seven, The (1954)|01-Jan-1954||http://us.imdb.com/M/title-exact?Shichinin%20no%20samurai%20(1954)|0|1|0|0|0|0|0|0|1|0|0|0|0|0|0|0|0|0|1
511|Lawrence of Arabia (1962)|01-Jan-1962||http://us.imdb.com/M/title-exact?Lawrence%20of%20Arabia%20(1962)|0|0|1|0|0|0|0|0|0|0|0|0|0|0|0|0|0|1|0
512|Wings of Desire (1987)|01-Jan-1987||http://us.imdb.com/Title?Himmel+%FCber+Berlin,+Der+(1987)|0|0|0|0|0|1|0|0|1|0|0|0|0|0|1|0|0|0|0
513|Third Man, The (1949)|01-Jan-1949||http://us.imdb.com/M/title-exact?Third%20Man,%20The%20(1949)|0|0|0|0|0|0|0|0|0|0|0|0|0|1|0|0|1|0|0
514|Annie Hall (1977)|01-Jan-1977||http://us.imdb.com/M/title-exact?Annie%20Hall%20(1977)|0|0|0|0|0|1|0|0|0|0|0|0|0|0|1|0|0|0|0
515|Boot, Das (1981)|04-Apr-1997||http://us.imdb.com/M/title-exact?Boot,%20Das%20(1981)|0|1|0|0|0|0|0|0|1|0|0|0|0|0|0|0|0|1|0
516|Local Hero (1983)|01-Jan-1983||http://us.imdb.com/M/title-exact?Local%20Hero%20(1983)|0|0|0|0|0|1|0|0|0|0|0|0|0|0|0|0|0|0|0
517|Manhattan (1979)|01-Jan-1979||http://us.imdb.com/M/title-exact?Manhattan%20(1979)|0|0|0|0|0|1|0|0|1|0|0|0|0|0|1|0|0|0|0
518|Miller's Crossing (1990)|01-Jan-1990||http://us.imdb.com/M/title-exact?Miller's%20Crossing%20(1990)|0|0|0|0|0|0|0|0|1|0|0|0|0|0|0|0|0|0|0
519|Treasure of the Sierra Madre, The (1948)|01-Jan-1948||http://us.imdb.com/M/title-exact?Treasure%20of%20the%20Sierra%20Madre,%20The%20(1948)|0|0|1|0|0|0|0|0|0|0|0|0|0|0|0|0|0|0|0
520|Great Escape, The (1963)|01-Jan-1963||http://us.imdb.com/M/title-exact?Great%20Escape,%20The%20(1963)|0|0|1|0|0|0|0|0|0|0|0|0|0|0|0|0|0|1|0
521|Deer Hunter, The (1978)|01-Jan-1978||http://us.imdb.com/M/title-exact?Deer%20Hunter,%20The%20(1978)|0|0|0|0|0|0|0|0|1|0|0|0|0|0|0|0|0|1|0
522|Down by Law (1986)|01-Jan-1986||http://us.imdb.com/M/title-exact?Down%20by%20Law%20(1986)|0|0|0|0|0|1|0|0|1|0|0|0|0|0|0|0|0|0|0
523|Cool Hand Luke (1967)|01-Jan-1967||http://us.imdb.com/M/title-exact?Cool%20Hand%20Luke%20(1967)|0|0|0|0|0|1|0|0|1|0|0|0|0|0|0|0|0|0|0
524|Great Dictator, The (1940)|01-Jan-1940||http://us.imdb.com/M/title-exact?Great%20Dictator,%20The%20(1940)|0|0|0|0|0|1|0|0|0|0|0|0|0|0|0|0|0|0|0
525|Big Sleep, The (1946)|01-Jan-1946||http://us.imdb.com/M/title-exact?Big%20Sleep,%20The%20(1946)|0|0|0|0|0|0|0|0|0|0|1|0|0|1|0|0|0|0|0
526|Ben-Hur (1959)|01-Jan-1959||http://us.imdb.com/M/title-exact?Ben-Hur%20(1959)|0|1|1|0|0|0|0|0|1|0|0|0|0|0|0|0|0|0|0
527|Gandhi (1982)|01-Jan-1982||http://us.imdb.com/M/title-exact?Gandhi%20(1982)|0|0|0|0|0|0|0|0|1|0|0|0|0|0|0|0|0|0|0
528|Killing Fields, The (1984)|01-Jan-1984||http://us.imdb.com/M/title-exact?Killing%20Fields,%20The%20(1984)|0|0|0|0|0|0|0|0|1|0|0|0|0|0|0|0|0|1|0
529|My Life as a Dog (Mitt liv som hund) (1985)|01-Jan-1985||http://us.imdb.com/M/title-exact?Mitt%20liv%20som%20hund%20(1985)|0|0|0|0|0|0|0|0|1|0|0|0|0|0|0|0|0|0|0
530|Man Who Would Be King, The (1975)|01-Jan-1975||http://us.imdb.com/M/title-exact?Man%20Who%20Would%20Be%20King,%20The%20(1975)|0|0|1|0|0|0|0|0|0|0|0|0|0|0|0|0|0|0|0
531|Shine (1996)|22-Nov-1996||http://us.imdb.com/M/title-exact?Shine%20(1996)|0|0|0|0|0|0|0|0|1|0|0|0|0|0|1|0|0|0|0
532|Kama Sutra: A Tale of Love (1996)|07-Mar-1997||http://us.imdb.com/M/title-exact?Kama%20Sutra%20(1996)|0|0|0|0|0|0|0|0|0|0|0|0|0|0|1|0|0|0|0
533|Daytrippers, The (1996)|21-Mar-1997||http://us.imdb.com/M/title-exact?Daytrippers%2C%20The%20(1996)|0|0|0|0|0|0|0|0|0|0|0|0|0|1|0|0|0|0|0
534|Traveller (1997)|18-Apr-1997||http://us.imdb.com/M/title-exact?Traveller%20%281997%29|0|0|0|0|0|0|0|0|1|0|0|0|0|0|0|0|0|0|0
535|Addicted to Love (1997)|23-May-1997||http://us.imdb.com/M/title-exact?Addicted%20to%20Love%20%281997%29|0|0|0|0|0|1|0|0|0|0|0|0|0|0|1|0|0|0|0
536|Ponette (1996)|23-May-1997||http://us.imdb.com/M/title-exact?Ponette%20%281996%29|0|0|0|0|0|0|0|0|1|0|0|0|0|0|0|0|0|0|0
537|My Own Private Idaho (1991)|01-Jan-1991||http://us.imdb.com/M/title-exact?My+Own+Private+Idaho+(1991)|0|0|0|0|0|0|0|0|1|0|0|0|0|0|0|0|0|0|0
538|Anastasia (1997)|01-Jan-1997||http://us.imdb.com/M/title-exact?Anastasia+(1997)|0|0|0|1|1|0|0|0|0|0|0|0|1|0|0|0|0|0|0
539|Mouse Hunt (1997)|01-Jan-1997||http://us.imdb.com/M/title-exact?imdb-title-119715|0|0|0|0|1|1|0|0|0|0|0|0|0|0|0|0|0|0|0
540|Money Train (1995)|01-Jan-1995||http://us.imdb.com/M/title-exact?Money%20Train%20(1995)|0|1|0|0|0|0|0|0|0|0|0|0|0|0|0|0|0|0|0
541|Mortal Kombat (1995)|01-Jan-1995||http://us.imdb.com/M/title-exact?Mortal%20Kombat%20(1995)|0|1|1|0|0|0|0|0|0|0|0|0|0|0|0|0|0|0|0
542|Pocahontas (1995)|01-Jan-1995||http://us.imdb.com/M/title-exact?Pocahontas%20(1995)|0|0|0|1|1|0|0|0|0|0|0|0|1|0|1|0|0|0|0
543|Mis�rables, Les (1995)|01-Jan-1995||http://us.imdb.com/M/title-exact?Mis%E9rables%2C%20Les%20%281995%29|0|0|0|0|0|0|0|0|1|0|0|0|1|0|0|0|0|0|0
544|Things to Do in Denver when You're Dead (1995)|02-Feb-1996||http://us.imdb.com/M/title-exact?Things%20to%20Do%20in%20Denver%20when%20You're%20Dead%20(1995)|0|0|0|0|0|0|1|0|1|0|0|0|0|0|1|0|0|0|0
545|Vampire in Brooklyn (1995)|01-Jan-1995||http://us.imdb.com/M/title-exact?Vampire%20in%20Brooklyn%20(1995)|0|0|0|0|0|1|0|0|0|0|0|0|0|0|1|0|0|0|0
546|Broken Arrow (1996)|09-Feb-1996||http://us.imdb.com/M/title-exact?Broken%20Arrow%20(1996)|0|1|0|0|0|0|0|0|0|0|0|0|0|0|0|0|1|0|0
547|Young Poisoner's Handbook, The (1995)|23-Feb-1996||http://us.imdb.com/M/title-exact?Young%20Poisoner's%20Handbook,%20The%20(1995)|0|0|0|0|0|0|1|0|0|0|0|0|0|0|0|0|0|0|0
548|NeverEnding Story III, The (1994)|02-Feb-1996||http://us.imdb.com/M/title-exact?NeverEnding%20Story%20III,%20The%20(1994)|0|0|0|0|1|0|0|0|0|1|0|0|0|0|0|0|0|0|0
549|Rob Roy (1995)|01-Jan-1995||http://us.imdb.com/M/title-exact?Rob%20Roy%20(1995)|0|0|0|0|0|0|0|0|1|0|0|0|0|0|1|0|0|1|0
550|Die Hard: With a Vengeance (1995)|01-Jan-1995||http://us.imdb.com/M/title-exact?Die%20Hard:%20With%20a%20Vengeance%20(1995)|0|1|0|0|0|0|0|0|0|0|0|0|0|0|0|0|1|0|0
551|Lord of Illusions (1995)|01-Jan-1995||http://us.imdb.com/M/title-exact?Lord%20of%20Illusions%20(1995)|0|0|0|0|0|0|0|0|0|0|0|1|0|0|0|0|0|0|0
552|Species (1995)|01-Jan-1995||http://us.imdb.com/M/title-exact?Species%20(1995)|0|0|0|0|0|0|0|0|0|0|0|0|0|0|0|1|0|0|0
553|Walk in the Clouds, A (1995)|01-Jan-1995||http://us.imdb.com/M/title-exact?Walk%20in%20the%20Clouds,%20A%20(1995)|0|0|0|0|0|0|0|0|1|0|0|0|0|0|1|0|0|0|0
554|Waterworld (1995)|01-Jan-1995||http://us.imdb.com/M/title-exact?Waterworld%20(1995)|0|1|1|0|0|0|0|0|0|0|0|0|0|0|0|0|0|0|0
555|White Man's Burden (1995)|01-Jan-1995||http://us.imdb.com/M/title-exact?White%20Man's%20Burden%20(1995)|0|0|0|0|0|0|0|0|1|0|0|0|0|0|0|0|0|0|0
556|Wild Bill (1995)|01-Jan-1995||http://us.imdb.com/M/title-exact?Wild%20Bill%20(1995)|0|0|0|0|0|0|0|0|0|0|0|0|0|0|0|0|0|0|1
557|Farinelli: il castrato (1994)|01-Jan-1994||http://us.imdb.com/M/title-exact?Farinelli:%20il%20castrato%20(1994)|0|0|0|0|0|0|0|0|1|0|0|0|1|0|0|0|0|0|0
558|Heavenly Creatures (1994)|01-Jan-1994||http://us.imdb.com/M/title-exact?Heavenly%20Creatures%20(1994)|0|0|0|0|0|0|0|0|1|1|0|0|0|0|0|0|1|0|0
559|Interview with the Vampire (1994)|01-Jan-1994||http://us.imdb.com/M/title-exact?Interview%20with%20the%20Vampire%20(1994)|0|0|0|0|0|0|0|0|1|0|0|1|0|0|0|0|0|0|0
560|Kid in King Arthur's Court, A (1995)|01-Jan-1995||http://us.imdb.com/M/title-exact?Kid%20in%20King%20Arthur's%20Court,%20A%20(1995)|0|0|1|0|1|1|0|0|0|1|0|0|0|0|1|1|0|0|0
561|Mary Shelley's Frankenstein (1994)|01-Jan-1994||http://us.imdb.com/M/title-exact?Mary%20Shelley's%20Frankenstein%20(1994)|0|0|0|0|0|0|0|0|1|0|0|1|0|0|0|0|0|0|0
562|Quick and the Dead, The (1995)|01-Jan-1995||http://us.imdb.com/M/title-exact?Quick%20and%20the%20Dead,%20The%20(1995)|0|1|1|0|0|0|0|0|0|0|0|0|0|0|0|0|0|0|1
563|Stephen King's The Langoliers (1995)|01-Jan-1995||http://us.imdb.com/M/title-exact?%22Langoliers,%20The%22%20(1995)%20(mini)|0|0|0|0|0|0|0|0|0|0|0|1|0|0|0|0|0|0|0
564|Tales from the Hood (1995)|01-Jan-1995||http://us.imdb.com/M/title-exact?Tales%20from%20the%20Hood%20(1995)|0|0|0|0|0|1|0|0|0|0|0|1|0|0|0|0|0|0|0
565|Village of the Damned (1995)|01-Jan-1995||http://us.imdb.com/M/title-exact?Village%20of%20the%20Damned%20(1995)|0|0|0|0|0|0|0|0|0|0|0|1|0|0|0|0|1|0|0
566|Clear and Present Danger (1994)|01-Jan-1994||http://us.imdb.com/M/title-exact?Clear%20and%20Present%20Danger%20(1994)|0|1|1|0|0|0|0|0|0|0|0|0|0|0|0|0|1|0|0
567|Wes Craven's New Nightmare (1994)|01-Jan-1994||http://us.imdb.com/M/title-exact?Wes%20Craven's%20New%20Nightmare%20(1994)|0|0|0|0|0|0|0|0|0|0|0|1|0|0|0|0|0|0|0
568|Speed (1994)|01-Jan-1994||http://us.imdb.com/M/title-exact?Speed%20(1994/I)|0|1|0|0|0|0|0|0|0|0|0|0|0|0|1|0|1|0|0
569|Wolf (1994)|01-Jan-1994||http://us.imdb.com/M/title-exact?Wolf%20(1994)|0|0|0|0|0|0|0|0|1|0|0|1|0|0|0|0|0|0|0
570|Wyatt Earp (1994)|01-Jan-1994||http://us.imdb.com/M/title-exact?Wyatt%20Earp%20(1994)|0|0|0|0|0|0|0|0|0|0|0|0|0|0|0|0|0|0|1
571|Another Stakeout (1993)|01-Jan-1993||http://us.imdb.com/M/title-exact?Another%20Stakeout%20(1993)|0|0|0|0|0|1|0|0|0|0|0|0|0|0|0|0|1|0|0
572|Blown Away (1994)|01-Jan-1994||http://us.imdb.com/M/title-exact?Blown%20Away%20(1994)|0|1|0|0|0|0|0|0|0|0|0|0|0|0|0|0|1|0|0
573|Body Snatchers (1993)|01-Jan-1993||http://us.imdb.com/M/title-exact?Body%20Snatchers%20(1993)|0|0|0|0|0|0|0|0|0|0|0|1|0|0|0|1|1|0|0
574|Boxing Helena (1993)|01-Jan-1993||http://us.imdb.com/M/title-exact?Boxing%20Helena%20(1993)|0|0|0|0|0|0|0|0|0|0|0|0|0|1|1|0|1|0|0
575|City Slickers II: The Legend of Curly's Gold (1994)|01-Jan-1994||http://us.imdb.com/M/title-exact?City%20Slickers%20II:%20The%20Legend%20of%20Curly's%20Gold%20(1994)|0|0|0|0|0|1|0|0|0|0|0|0|0|0|0|0|0|0|1
576|Cliffhanger (1993)|01-Jan-1993||http://us.imdb.com/M/title-exact?Cliffhanger%20(1993)|0|1|1|0|0|0|1|0|0|0|0|0|0|0|0|0|0|0|0
577|Coneheads (1993)|01-Jan-1993||http://us.imdb.com/M/title-exact?Coneheads%20(1993)|0|0|0|0|0|1|0|0|0|0|0|0|0|0|0|1|0|0|0
578|Demolition Man (1993)|01-Jan-1993||http://us.imdb.com/M/title-exact?Demolition%20Man%20(1993)|0|1|0|0|0|0|0|0|0|0|0|0|0|0|0|1|0|0|0
579|Fatal Instinct (1993)|01-Jan-1993||http://us.imdb.com/M/title-exact?Fatal%20Instinct%20(1993)|0|0|0|0|0|1|0|0|0|0|0|0|0|0|0|0|0|0|0
580|Englishman Who Went Up a Hill, But Came Down a Mountain, The (1995)|01-Jan-1995||http://us.imdb.com/M/title-exact?Englishman%20Who%20Went%20Up%20a%20Hill,%20But%20Came%20Down%20a%20Mountain,%20The%20(1995)|0|0|0|0|0|1|0|0|0|0|0|0|0|0|1|0|0|0|0
581|Kalifornia (1993)|01-Jan-1993||http://us.imdb.com/M/title-exact?Kalifornia%20(1993)|0|0|0|0|0|0|0|0|1|0|0|0|0|0|0|0|1|0|0
582|Piano, The (1993)|01-Jan-1993||http://us.imdb.com/M/title-exact?Piano,%20The%20(1993)|0|0|0|0|0|0|0|0|1|0|0|0|0|0|1|0|0|0|0
583|Romeo Is Bleeding (1993)|01-Jan-1993||http://us.imdb.com/M/title-exact?Romeo%20Is%20Bleeding%20(1993)|0|0|0|0|0|0|1|0|0|0|0|0|0|0|0|0|1|0|0
584|Secret Garden, The (1993)|01-Jan-1993||http://us.imdb.com/M/title-exact?Secret%20Garden,%20The%20(1993)|0|0|0|0|1|0|0|0|1|0|0|0|0|0|0|0|0|0|0
585|Son in Law (1993)|01-Jan-1993||http://us.imdb.com/M/title-exact?Son%20in%20Law%20(1993)|0|0|0|0|0|1|0|0|0|0|0|0|0|0|0|0|0|0|0
586|Terminal Velocity (1994)|01-Jan-1994||http://us.imdb.com/M/title-exact?Terminal%20Velocity%20(1994)|0|1|0|0|0|0|0|0|0|0|0|0|0|0|0|0|0|0|0
587|Hour of the Pig, The (1993)|01-Jan-1993||http://us.imdb.com/M/title-exact?Hour%20of%20the%20Pig,%20The%20(1993)|0|0|0|0|0|0|0|0|1|0|0|0|0|1|0|0|0|0|0
588|Beauty and the Beast (1991)|01-Jan-1991||http://us.imdb.com/M/title-exact?Beauty%20and%20the%20Beast%20(1991)|0|0|0|1|1|0|0|0|0|0|0|0|1|0|0|0|0|0|0
589|Wild Bunch, The (1969)|01-Jan-1969||http://us.imdb.com/M/title-exact?Wild%20Bunch,%20The%20(1969)|0|0|0|0|0|0|0|0|0|0|0|0|0|0|0|0|0|0|1
590|Hellraiser: Bloodline (1996)|08-Mar-1996||http://us.imdb.com/M/title-exact?Hellraiser:%20Bloodline%20(1996)|0|1|0|0|0|0|0|0|0|0|0|1|0|0|0|1|0|0|0
591|Primal Fear (1996)|30-Mar-1996||http://us.imdb.com/M/title-exact?Primal%20Fear%20(1996)|0|0|0|0|0|0|0|0|1|0|0|0|0|0|0|0|1|0|0
592|True Crime (1995)|01-Jan-1995||http://us.imdb.com/M/title-exact?True%20Crime%20(1995)|0|0|0|0|0|0|0|0|0|0|0|0|0|1|0|0|1|0|0
593|Stalingrad (1993)|01-Jan-1993||http://us.imdb.com/M/title-exact?Stalingrad%20(1993)|0|0|0|0|0|0|0|0|0|0|0|0|0|0|0|0|0|1|0
594|Heavy (1995)|05-Jun-1996||http://us.imdb.com/M/title-exact?Heavy%20(1995)|0|0|0|0|0|0|0|0|1|0|0|0|0|0|1|0|0|0|0
595|Fan, The (1996)|16-Aug-1996||http://us.imdb.com/M/title-exact?Fan,%20The%20(1996)|0|0|0|0|0|0|0|0|0|0|0|0|0|0|0|0|1|0|0
596|Hunchback of Notre Dame, The (1996)|21-Jun-1996||http://us.imdb.com/M/title-exact?Hunchback%20of%20Notre%20Dame,%20The%20(1996)|0|0|0|1|1|0|0|0|0|0|0|0|1|0|0|0|0|0|0
597|Eraser (1996)|21-Jun-1996||http://us.imdb.com/M/title-exact?Eraser%20(1996)|0|1|0|0|0|0|0|0|0|0|0|0|0|0|0|0|1|0|0
598|Big Squeeze, The (1996)|06-Sep-1996||http://us.imdb.com/M/title-exact?Big%20Squeeze,%20The%20(1996)|0|0|0|0|0|1|0|0|1|0|0|0|0|0|0|0|0|0|0
599|Police Story 4: Project S (Chao ji ji hua) (1993)|16-Aug-1996||http://us.imdb.com/M/title-exact?Project%20S%20(1993)|0|1|0|0|0|0|0|0|0|0|0|0|0|0|0|0|0|0|0
600|Daniel Defoe's Robinson Crusoe (1996)|01-Jan-1996||http://us.imdb.com/M/title-exact?Robinson%20Crusoe%20(1996)|0|0|0|0|1|0|0|0|0|0|0|0|0|0|0|0|0|0|0
601|For Whom the Bell Tolls (1943)|01-Jan-1943||http://us.imdb.com/M/title-exact?For%20Whom%20the%20Bell%20Tolls%20(1943)|0|0|1|0|0|0|0|0|0|0|0|0|0|0|0|0|0|1|0
602|American in Paris, An (1951)|01-Jan-1951||http://us.imdb.com/M/title-exact?American%20in%20Paris,%20An%20(1951)|0|0|0|0|0|0|0|0|0|0|0|0|1|0|1|0|0|0|0
603|Rear Window (1954)|01-Jan-1954||http://us.imdb.com/M/title-exact?Rear%20Window%20(1954)|0|0|0|0|0|0|0|0|0|0|0|0|0|1|0|0|1|0|0
604|It Happened One Night (1934)|01-Jan-1934||http://us.imdb.com/M/title-exact?It%20Happened%20One%20Night%20(1934)|0|0|0|0|0|1|0|0|0|0|0|0|0|0|0|0|0|0|0
605|Meet Me in St. Louis (1944)|01-Jan-1944||http://us.imdb.com/M/title-exact?Meet%20Me%20in%20St.%20Louis%20(1944)|0|0|0|0|0|0|0|0|0|0|0|0|1|0|0|0|0|0|0
606|All About Eve (1950)|01-Jan-1950||http://us.imdb.com/M/title-exact?All%20About%20Eve%20(1950)|0|0|0|0|0|0|0|0|1|0|0|0|0|0|0|0|0|0|0
607|Rebecca (1940)|01-Jan-1940||http://us.imdb.com/M/title-exact?Rebecca%20(1940)|0|0|0|0|0|0|0|0|0|0|0|0|0|0|1|0|1|0|0
608|Spellbound (1945)|01-Jan-1945||http://us.imdb.com/M/title-exact?Spellbound%20(1945)|0|0|0|0|0|0|0|0|0|0|0|0|0|1|1|0|1|0|0
609|Father of the Bride (1950)|01-Jan-1950||http://us.imdb.com/M/title-exact?Father%20of%20the%20Bride%20(1950)|0|0|0|0|0|1|0|0|0|0|0|0|0|0|0|0|0|0|0
610|Gigi (1958)|01-Jan-1958||http://us.imdb.com/M/title-exact?Gigi%20(1958)|0|0|0|0|0|0|0|0|0|0|0|0|1|0|0|0|0|0|0
611|Laura (1944)|01-Jan-1944||http://us.imdb.com/M/title-exact?Laura%20(1944)|0|0|0|0|0|0|1|0|0|0|1|0|0|1|0|0|0|0|0
612|Lost Horizon (1937)|01-Jan-1937||http://us.imdb.com/M/title-exact?Lost%20Horizon%20(1937)|0|0|0|0|0|0|0|0|1|0|0|0|0|0|0|0|0|0|0
613|My Man Godfrey (1936)|01-Jan-1936||http://us.imdb.com/M/title-exact?My%20Man%20Godfrey%20(1936)|0|0|0|0|0|1|0|0|0|0|0|0|0|0|0|0|0|0|0
614|Giant (1956)|01-Jan-1956||http://us.imdb.com/M/title-exact?Giant%20(1956)|0|0|0|0|0|0|0|0|1|0|0|0|0|0|0|0|0|0|0
615|39 Steps, The (1935)|01-Jan-1935||http://us.imdb.com/M/title-exact?39%20Steps,%20The%20(1935)|0|0|0|0|0|0|0|0|0|0|0|0|0|0|0|0|1|0|0
616|Night of the Living Dead (1968)|01-Jan-1968||http://us.imdb.com/M/title-exact?Night%20of%20the%20Living%20Dead%20(1968)|0|0|0|0|0|0|0|0|0|0|0|1|0|0|0|1|0|0|0
617|Blue Angel, The (Blaue Engel, Der) (1930)|01-Jan-1930||http://us.imdb.com/M/title-exact?Blaue%20Engel,%20Der%20(1930)|0|0|0|0|0|0|0|0|1|0|0|0|0|0|0|0|0|0|0
618|Picnic (1955)|01-Jan-1955||http://us.imdb.com/M/title-exact?Picnic%20(1955)|0|0|0|0|0|0|0|0|1|0|0|0|0|0|0|0|0|0|0
619|Extreme Measures (1996)|27-Sep-1996||http://us.imdb.com/M/title-exact?Extreme%20Measures%20(1996)|0|0|0|0|0|0|0|0|1|0|0|0|0|0|0|0|1|0|0
620|Chamber, The (1996)|11-Oct-1996||http://us.imdb.com/M/title-exact?Chamber,%20The%20(1996)|0|0|0|0|0|0|0|0|1|0|0|0|0|0|0|0|0|0|0
621|Davy Crockett, King of the Wild Frontier (1955)|01-Jan-1955||http://us.imdb.com/M/title-exact?Davy%20Crockett%2C%20King%20of%20the%20Wild%20Frontier%20%281955%29|0|0|0|0|0|0|0|0|0|0|0|0|0|0|0|0|0|0|1
622|Swiss Family Robinson (1960)|01-Jan-1960||http://us.imdb.com/M/title-exact?Swiss%20Family%20Robinson%20(1960)|0|0|1|0|1|0|0|0|0|0|0|0|0|0|0|0|0|0|0
623|Angels in the Outfield (1994)|01-Jan-1994||http://us.imdb.com/M/title-exact?Angels%20in%20the%20Outfield%20(1994)|0|0|0|0|1|1|0|0|0|0|0|0|0|0|0|0|0|0|0
624|Three Caballeros, The (1945)|01-Jan-1945||http://us.imdb.com/M/title-exact?Three%20Caballeros,%20The%20(1945)|0|0|0|1|1|0|0|0|0|0|0|0|1|0|0|0|0|0|0
625|Sword in the Stone, The (1963)|01-Jan-1963||http://us.imdb.com/M/title-exact?Sword%20in%20the%20Stone,%20The%20(1963)|0|0|0|1|1|0|0|0|0|0|0|0|0|0|0|0|0|0|0
626|So Dear to My Heart (1949)|01-Jan-1949||http://us.imdb.com/Title?So+Dear+to+My+Heart+(1949)|0|0|0|0|1|0|0|0|1|0|0|0|0|0|0|0|0|0|0
627|Robin Hood: Prince of Thieves (1991)|01-Jan-1991||http://us.imdb.com/Title?Robin+Hood%3A+Prince+of+Thieves+(1991)|0|0|0|0|0|0|0|0|1|0|0|0|0|0|0|0|0|0|0
628|Sleepers (1996)|18-Oct-1996||http://us.imdb.com/M/title-exact?Sleepers%20(1996)|0|0|0|0|0|0|1|0|1|0|0|0|0|0|0|0|0|0|0
629|Victor/Victoria (1982)|01-Jan-1982||http://us.imdb.com/M/title-exact?Victor/Victoria%20%281982%29|0|0|0|0|0|1|0|0|0|0|0|0|1|0|0|0|0|0|0
630|Great Race, The (1965)|01-Jan-1965||http://us.imdb.com/M/title-exact?Great%20Race,%20The%20(1965)|0|0|0|0|0|1|0|0|0|0|0|0|1|0|0|0|0|0|0
631|Crying Game, The (1992)|01-Jan-1992||http://us.imdb.com/M/title-exact?Crying%20Game,%20The%20(1992)|0|1|0|0|0|0|0|0|1|0|0|0|0|0|1|0|0|1|0
632|Sophie's Choice (1982)|01-Jan-1982||http://us.imdb.com/M/title-exact?Sophie's%20Choice%20(1982)|0|0|0|0|0|0|0|0|1|0|0|0|0|0|0|0|0|0|0
633|Christmas Carol, A (1938)|01-Jan-1938||http://us.imdb.com/M/title-exact?Christmas%20Carol,%20A%20(1938)|0|0|0|0|0|0|0|0|1|0|0|0|0|0|0|0|0|0|0
634|Microcosmos: Le peuple de l'herbe (1996)|11-Oct-1996||http://us.imdb.com/M/title-exact?Microcosmos%3A%20Le%20peuple%20de%20l%27herbe%20%281996%29|0|0|0|0|0|0|0|1|0|0|0|0|0|0|0|0|0|0|0
635|Fog, The (1980)|01-Jan-1980||http://us.imdb.com/M/title-exact?Fog,%20The%20(1980)|0|0|0|0|0|0|0|0|0|0|0|1|0|0|0|0|0|0|0
636|Escape from New York (1981)|01-Jan-1981||http://us.imdb.com/M/title-exact?Escape%20from%20New%20York%20(1981)|0|1|1|0|0|0|0|0|0|0|0|0|0|0|0|1|1|0|0
637|Howling, The (1981)|01-Jan-1981||http://us.imdb.com/M/title-exact?Howling,%20The%20(1981)|0|0|0|0|0|1|0|0|0|0|0|1|0|0|0|0|0|0|0
638|Return of Martin Guerre, The (Retour de Martin Guerre, Le) (1982)|01-Jan-1982||http://us.imdb.com/M/title-exact?Retour%20de%20Martin%20Guerre,%20Le%20(1982)|0|0|0|0|0|0|0|0|1|0|0|0|0|0|0|0|0|0|0
639|Tin Drum, The (Blechtrommel, Die) (1979)|01-Jan-1979||http://us.imdb.com/M/title-exact?Blechtrommel,%20Die%20(1979)|0|0|0|0|0|0|0|0|1|0|0|0|0|0|0|0|0|0|0
640|Cook the Thief His Wife & Her Lover, The (1989)|01-Jan-1989||http://us.imdb.com/M/title-exact?Cook%20the%20Thief%20His%20Wife%20&%20Her%20Lover,%20The%20(1989)|0|0|0|0|0|0|0|0|1|0|0|0|0|0|0|0|0|0|0
641|Paths of Glory (1957)|01-Jan-1957||http://us.imdb.com/M/title-exact?Paths%20of%20Glory%20(1957)|0|0|0|0|0|0|0|0|1|0|0|0|0|0|0|0|0|1|0
642|Grifters, The (1990)|01-Jan-1990||http://us.imdb.com/M/title-exact?Grifters,%20The%20(1990)|0|0|0|0|0|0|1|0|1|0|1|0|0|0|0|0|0|0|0
643|The Innocent (1994)|01-Jan-1994||http://us.imdb.com/M/title-exact?Innocent,%20The%20(1994)%20(TV)|0|0|0|0|0|0|0|0|1|0|0|0|0|0|1|0|0|0|0
644|Thin Blue Line, The (1988)|01-Jan-1988||http://us.imdb.com/M/title-exact?Thin%20Blue%20Line,%20The%20(1988)|0|0|0|0|0|0|0|1|0|0|0|0|0|0|0|0|0|0|0
645|Paris Is Burning (1990)|01-Jan-1990||http://us.imdb.com/M/title-exact?Paris%20Is%20Burning%20(1990)|0|0|0|0|0|0|0|1|0|0|0|0|0|0|0|0|0|0|0
646|Once Upon a Time in the West (1969)|01-Jan-1969||http://us.imdb.com/M/title-exact?C'era%20una%20volta%20il%20west%20(1969)|0|0|0|0|0|0|0|0|0|0|0|0|0|0|0|0|0|0|1
647|Ran (1985)|01-Jan-1985||http://us.imdb.com/M/title-exact?Ran%20(1985)|0|0|0|0|0|0|0|0|1|0|0|0|0|0|0|0|0|1|0
648|Quiet Man, The (1952)|01-Jan-1952||http://us.imdb.com/M/title-exact?Quiet%20Man,%20The%20(1952)|0|0|0|0|0|1|0|0|0|0|0|0|0|0|1|0|0|0|0
649|Once Upon a Time in America (1984)|01-Jan-1984||http://us.imdb.com/M/title-exact?Once%20Upon%20a%20Time%20in%20America%20(1984)|0|0|0|0|0|0|1|0|1|0|0|0|0|0|0|0|1|0|0
650|Seventh Seal, The (Sjunde inseglet, Det) (1957)|01-Jan-1957||http://us.imdb.com/M/title-exact?Sjunde%20inseglet,%20Det%20(1957)|0|0|0|0|0|0|0|0|1|0|0|0|0|0|0|0|0|0|0
651|Glory (1989)|01-Jan-1989||http://us.imdb.com/M/title-exact?Glory%20(1989)|0|1|0|0|0|0|0|0|1|0|0|0|0|0|0|0|0|1|0
652|Rosencrantz and Guildenstern Are Dead (1990)|01-Jan-1990||http://us.imdb.com/M/title-exact?Rosencrantz%20and%20Guildenstern%20Are%20Dead%20(1990)|0|0|0|0|0|1|0|0|1|0|0|0|0|0|0|0|0|0|0
653|Touch of Evil (1958)|01-Jan-1958||http://us.imdb.com/M/title-exact?Touch%20of%20Evil%20(1958)|0|0|0|0|0|0|1|0|0|0|1|0|0|0|0|0|1|0|0
654|Chinatown (1974)|01-Jan-1974||http://us.imdb.com/M/title-exact?Chinatown%20(1974)|0|0|0|0|0|0|0|0|0|0|1|0|0|1|0|0|1|0|0
655|Stand by Me (1986)|01-Jan-1986||http://us.imdb.com/M/title-exact?Stand%20by%20Me%20(1986)|0|0|1|0|0|1|0|0|1|0|0|0|0|0|0|0|0|0|0
656|M (1931)|01-Jan-1931||http://us.imdb.com/M/title-exact?M%20(1931)|0|0|0|0|0|0|1|0|0|0|1|0|0|0|0|0|1|0|0
657|Manchurian Candidate, The (1962)|01-Jan-1962||http://us.imdb.com/M/title-exact?Manchurian%20Candidate,%20The%20(1962)|0|0|0|0|0|0|0|0|0|0|1|0|0|0|0|0|1|0|0
658|Pump Up the Volume (1990)|01-Jan-1990||http://us.imdb.com/M/title-exact?Pump%20Up%20the%20Volume%20(1990)|0|0|0|0|0|0|0|0|1|0|0|0|0|0|0|0|0|0|0
659|Arsenic and Old Lace (1944)|01-Jan-1944||http://us.imdb.com/M/title-exact?Arsenic%20and%20Old%20Lace%20(1944)|0|0|0|0|0|1|0|0|0|0|0|0|0|1|0|0|1|0|0
660|Fried Green Tomatoes (1991)|01-Jan-1991||http://us.imdb.com/M/title-exact?Fried%20Green%20Tomatoes%20at%20the%20Whistle%20Stop%20Cafe%20(1991)|0|0|0|0|0|0|0|0|1|0|0|0|0|0|0|0|0|0|0
661|High Noon (1952)|01-Jan-1952||http://us.imdb.com/M/title-exact?High%20Noon%20(1952)|0|0|0|0|0|0|0|0|0|0|0|0|0|0|0|0|0|0|1
662|Somewhere in Time (1980)|01-Jan-1980||http://us.imdb.com/M/title-exact?Somewhere%20in%20Time%20(1980)|0|0|0|0|0|0|0|0|1|0|0|0|0|0|1|0|0|0|0
663|Being There (1979)|01-Jan-1979||http://us.imdb.com/M/title-exact?Being%20There%20(1979)|0|0|0|0|0|1|0|0|0|0|0|0|0|0|0|0|0|0|0
664|Paris, Texas (1984)|01-Jan-1984||http://us.imdb.com/M/title-exact?Paris,%20Texas%20(1984)|0|0|0|0|0|0|0|0|1|0|0|0|0|0|0|0|0|0|0
665|Alien 3 (1992)|01-Jan-1992||http://us.imdb.com/M/title-exact?Alien%203%20(1992)|0|1|0|0|0|0|0|0|0|0|0|1|0|0|0|1|1|0|0
666|Blood For Dracula (Andy Warhol's Dracula) (1974)|01-Jan-1974||http://us.imdb.com/M/title-exact?Andy%20Warhol's%20Dracula%20(1974)|0|0|0|0|0|0|0|0|0|0|0|1|0|0|0|0|0|0|0
667|Audrey Rose (1977)|01-Jan-1977||http://us.imdb.com/M/title-exact?Audrey%20Rose%20(1977)|0|0|0|0|0|0|0|0|0|0|0|1|0|0|0|0|0|0|0
668|Blood Beach (1981)|01-Jan-1981||http://us.imdb.com/M/title-exact?Blood%20Beach%20(1981)|0|1|0|0|0|0|0|0|0|0|0|1|0|0|0|0|0|0|0
669|Body Parts (1991)|01-Jan-1991||http://us.imdb.com/M/title-exact?Body%20Parts%20(1991)|0|0|0|0|0|0|0|0|0|0|0|1|0|0|0|0|0|0|0
670|Body Snatchers (1993)|01-Jan-1993||http://us.imdb.com/M/title-exact?Body%20Snatchers%20(1993)|0|0|0|0|0|0|0|0|0|0|0|1|0|0|0|1|1|0|0
671|Bride of Frankenstein (1935)|01-Jan-1935||http://us.imdb.com/M/title-exact?Bride%20of%20Frankenstein%20(1935)|0|0|0|0|0|0|0|0|0|0|0|1|0|0|0|0|0|0|0
672|Candyman (1992)|01-Jan-1992||http://us.imdb.com/M/title-exact?Candyman%20(1992)|0|0|0|0|0|0|0|0|0|0|0|1|0|0|0|0|0|0|0
673|Cape Fear (1962)|01-Jan-1962||http://us.imdb.com/M/title-exact?Cape%20Fear%20(1962)|0|0|0|0|0|0|0|0|0|0|1|0|0|0|0|0|1|0|0
674|Cat People (1982)|01-Jan-1982||http://us.imdb.com/M/title-exact?Cat%20People%20(1982)|0|0|0|0|0|0|0|0|0|0|0|1|0|0|0|0|0|0|0
675|Nosferatu (Nosferatu, eine Symphonie des Grauens) (1922)|01-Jan-1922||http://us.imdb.com/M/title-exact?Nosferatu,%20eine%20Symphonie%20des%20Grauens%20(1922)|0|0|0|0|0|0|0|0|0|0|0|1|0|0|0|0|0|0|0
676|Crucible, The (1996)|27-Nov-1996||http://us.imdb.com/M/title-exact?Crucible,%20The%20(1996)|0|0|0|0|0|0|0|0|1|0|0|0|0|0|0|0|0|0|0
677|Fire on the Mountain (1996)|24-Jan-1997||http://us.imdb.com/M/title-exact?Fire%20on%20the%20Mountain%20(1996)|0|0|0|0|0|0|0|1|0|0|0|0|0|0|0|0|0|0|0
678|Volcano (1997)|25-Apr-1997||http://us.imdb.com/M/title-exact?Volcano%20%281997%29|0|0|0|0|0|0|0|0|1|0|0|0|0|0|0|0|1|0|0
679|Conan the Barbarian (1981)|01-Jan-1981||http://us.imdb.com/M/title-exact?Conan+the+Barbarian+(1981)|0|1|1|0|0|0|0|0|0|0|0|0|0|0|0|0|0|0|0
680|Kull the Conqueror (1997)|29-Aug-1997||http://us.imdb.com/M/title-exact?Kull+the+Conqueror+(1997)|0|1|1|0|0|0|0|0|0|0|0|0|0|0|0|0|0|0|0
681|Wishmaster (1997)|01-Jan-1997||http://us.imdb.com/M/title-exact?Wishmaster+(1997)|0|0|0|0|0|0|0|0|0|0|0|1|0|0|0|0|0|0|0
682|I Know What You Did Last Summer (1997)|17-Oct-1997||http://us.imdb.com/M/title-exact?I+Know+What+You+Did+Last+Summer+(1997)|0|0|0|0|0|0|0|0|0|0|0|1|0|1|0|0|1|0|0
683|Rocket Man (1997)|01-Jan-1997||http://us.imdb.com/M/title-exact?Rocket+Man+(1997)|0|0|0|0|0|1|0|0|0|0|0|0|0|0|0|0|0|0|0
684|In the Line of Fire (1993)|01-Jan-1993||http://us.imdb.com/M/title-exact?In%20the%20Line%20of%20Fire%20(1993)|0|1|0|0|0|0|0|0|0|0|0|0|0|0|0|0|1|0|0
685|Executive Decision (1996)|09-Mar-1996||http://us.imdb.com/M/title-exact?Executive%20Decision%20(1996)|0|1|0|0|0|0|0|0|0|0|0|0|0|0|0|0|1|0|0
686|Perfect World, A (1993)|01-Jan-1993||http://us.imdb.com/M/title-exact?Perfect%20World,%20A%20(1993)|0|1|0|0|0|0|0|0|1|0|0|0|0|0|0|0|0|0|0
687|McHale's Navy (1997)|18-Apr-1997||http://us.imdb.com/M/title-exact?McHale's%20Navy%20(1997)|0|0|0|0|0|1|0|0|0|0|0|0|0|0|0|0|0|1|0
688|Leave It to Beaver (1997)|22-Aug-1997||http://us.imdb.com/M/title-exact?Leave+It+To+Beaver+(1997)|0|0|0|0|0|1|0|0|0|0|0|0|0|0|0|0|0|0|0
689|Jackal, The (1997)|01-Jan-1997||http://us.imdb.com/M/title-exact?Jackal%2C+The+(1997)|0|1|0|0|0|0|0|0|0|0|0|0|0|0|0|0|1|0|0
690|Seven Years in Tibet (1997)|01-Jan-1997||http://us.imdb.com/M/title-exact?Seven+Years+in+Tibet+(1997)|0|0|0|0|0|0|0|0|1|0|0|0|0|0|0|0|0|1|0
691|Dark City (1998)|09-Jan-1998||http://us.imdb.com/M/title-exact?imdb-title-118929|0|0|0|0|0|0|0|0|0|0|1|0|0|0|0|1|1|0|0
692|American President, The (1995)|01-Jan-1995||http://us.imdb.com/M/title-exact?American%20President,%20The%20(1995)|0|0|0|0|0|1|0|0|1|0|0|0|0|0|1|0|0|0|0
693|Casino (1995)|01-Jan-1995||http://us.imdb.com/M/title-exact?Casino%20(1995)|0|0|0|0|0|0|0|0|1|0|0|0|0|0|0|0|0|0|0
694|Persuasion (1995)|25-Sep-1995||http://us.imdb.com/Title?Persuasion+(1995/I)|0|0|0|0|0|0|0|0|0|0|0|0|0|0|1|0|0|0|0
695|Kicking and Screaming (1995)|01-Jan-1995||http://us.imdb.com/M/title-exact?Kicking%20and%20Screaming%20(1995)|0|0|0|0|0|1|0|0|1|0|0|0|0|0|0|0|0|0|0
696|City Hall (1996)|16-Feb-1996||http://us.imdb.com/M/title-exact?City%20Hall%20(1996)|0|0|0|0|0|0|0|0|1|0|0|0|0|0|0|0|1|0|0
697|Basketball Diaries, The (1995)|01-Jan-1995||http://us.imdb.com/M/title-exact?Basketball%20Diaries,%20The%20(1995)|0|0|0|0|0|0|0|0|1|0|0|0|0|0|0|0|0|0|0
698|Browning Version, The (1994)|01-Jan-1994||http://us.imdb.com/M/title-exact?Browning%20Version,%20The%20(1994)|0|0|0|0|0|0|0|0|1|0|0|0|0|0|0|0|0|0|0
699|Little Women (1994)|01-Jan-1994||http://us.imdb.com/M/title-exact?Little%20Women%20(1994)|0|0|0|0|0|0|0|0|1|0|0|0|0|0|0|0|0|0|0
700|Miami Rhapsody (1995)|01-Jan-1995||http://us.imdb.com/M/title-exact?Miami%20Rhapsody%20(1995)|0|0|0|0|0|1|0|0|0|0|0|0|0|0|0|0|0|0|0
701|Wonderful, Horrible Life of Leni Riefenstahl, The (1993)|01-Jan-1993||http://us.imdb.com/M/title-exact?Macht%20der%20Bilder:%20Leni%20Riefenstahl,%20Die%20(1993)|0|0|0|0|0|0|0|1|0|0|0|0|0|0|0|0|0|0|0
702|Barcelona (1994)|01-Jan-1994||http://us.imdb.com/M/title-exact?Barcelona%20(1994)|0|0|0|0|0|1|0|0|0|0|0|0|0|0|1|0|0|0|0
703|Widows' Peak (1994)|01-Jan-1994||http://us.imdb.com/M/title-exact?Widows'%20Peak%20(1994)|0|0|0|0|0|0|0|0|1|0|0|0|0|0|0|0|0|0|0
704|House of the Spirits, The (1993)|01-Jan-1993||http://us.imdb.com/M/title-exact?House%20of%20the%20Spirits,%20The%20(1993)|0|0|0|0|0|0|0|0|1|0|0|0|0|0|1|0|0|0|0
705|Singin' in the Rain (1952)|01-Jan-1952||http://us.imdb.com/M/title-exact?Singin'%20in%20the%20Rain%20(1952)|0|0|0|0|0|0|0|0|0|0|0|0|1|0|1|0|0|0|0
706|Bad Moon (1996)|01-Nov-1996||http://us.imdb.com/M/title-exact?Bad%20Moon%20(1996)|0|0|0|0|0|0|0|0|0|0|0|1|0|0|0|0|0|0|0
707|Enchanted April (1991)|01-Jan-1991||http://us.imdb.com/M/title-exact?Enchanted%20April%20(1991)|0|0|0|0|0|0|0|0|1|0|0|0|0|0|0|0|0|0|0
708|Sex, Lies, and Videotape (1989)|01-Jan-1989||http://us.imdb.com/M/title-exact?sex,%20lies,%20and%20videotape%20(1989)|0|0|0|0|0|0|0|0|1|0|0|0|0|0|0|0|0|0|0
709|Strictly Ballroom (1992)|01-Jan-1992||http://us.imdb.com/M/title-exact?Strictly%20Ballroom%20(1992)|0|0|0|0|0|1|0|0|0|0|0|0|0|0|1|0|0|0|0
710|Better Off Dead... (1985)|01-Jan-1985||http://us.imdb.com/Title?Better+Off+Dead...+(1985)|0|0|0|0|0|1|0|0|0|0|0|0|0|0|0|0|0|0|0
711|Substance of Fire, The (1996)|06-Dec-1996||http://us.imdb.com/M/title-exact?Substance%20of%20Fire,%20The%20(1996)|0|0|0|0|0|0|0|0|1|0|0|0|0|0|0|0|0|0|0
712|Tin Men (1987)|01-Jan-1987||http://us.imdb.com/M/title-exact?Tin%20Men%20(1987)|0|0|0|0|0|1|0|0|1|0|0|0|0|0|0|0|0|0|0
713|Othello (1995)|18-Dec-1995||http://us.imdb.com/M/title-exact?Othello%20(1995)|0|0|0|0|0|0|0|0|1|0|0|0|0|0|0|0|0|0|0
714|Carrington (1995)|01-Jan-1995||http://us.imdb.com/M/title-exact?Carrington%20(1995)|0|0|0|0|0|0|0|0|1|0|0|0|0|0|1|0|0|0|0
715|To Die For (1995)|01-Jan-1995||http://us.imdb.com/M/title-exact?To%20Die%20For%20(1995)|0|0|0|0|0|1|0|0|1|0|0|0|0|0|0|0|0|0|0
716|Home for the Holidays (1995)|01-Jan-1995||http://us.imdb.com/M/title-exact?Home%20for%20the%20Holidays%20(1995)|0|0|0|0|0|0|0|0|1|0|0|0|0|0|1|0|0|0|0
717|Juror, The (1996)|01-Jan-1996||http://us.imdb.com/M/title-exact?Juror,%20The%20(1996)|0|0|0|0|0|0|0|0|1|0|0|0|0|0|0|0|1|0|0
718|In the Bleak Midwinter (1995)|23-Feb-1996||http://us.imdb.com/M/title-exact?In%20the%20Bleak%20Midwinter%20(1995)|0|0|0|0|0|1|0|0|0|0|0|0|0|0|0|0|0|0|0
719|Canadian Bacon (1994)|01-Jan-1994||http://us.imdb.com/M/title-exact?Canadian%20Bacon%20(1994)|0|0|0|0|0|1|0|0|0|0|0|0|0|0|0|0|0|1|0
720|First Knight (1995)|01-Jan-1995||http://us.imdb.com/M/title-exact?First%20Knight%20(1995)|0|1|1|0|0|0|0|0|1|0|0|0|0|0|1|0|0|0|0
721|Mallrats (1995)|01-Jan-1995||http://us.imdb.com/M/title-exact?Mallrats%20(1995)|0|0|0|0|0|1|0|0|0|0|0|0|0|0|0|0|0|0|0
722|Nine Months (1995)|01-Jan-1995||http://us.imdb.com/M/title-exact?Nine%20Months%20(1995)|0|0|0|0|0|1|0|0|0|0|0|0|0|0|0|0|0|0|0
723|Boys on the Side (1995)|01-Jan-1995||http://us.imdb.com/M/title-exact?Boys%20on%20the%20Side%20(1995)|0|0|0|0|0|1|0|0|1|0|0|0|0|0|0|0|0|0|0
724|Circle of Friends (1995)|01-Jan-1995||http://us.imdb.com/M/title-exact?Circle%20of%20Friends%20(1995)|0|0|0|0|0|0|0|0|1|0|0|0|0|0|1|0|0|0|0
725|Exit to Eden (1994)|01-Jan-1994||http://us.imdb.com/M/title-exact?Exit%20to%20Eden%20(1994)|0|0|0|0|0|1|0|0|0|0|0|0|0|0|0|0|0|0|0
726|Fluke (1995)|01-Jan-1995||http://us.imdb.com/M/title-exact?Fluke%20(1995)|0|0|0|0|1|0|0|0|1|0|0|0|0|0|0|0|0|0|0
727|Immortal Beloved (1994)|01-Jan-1994||http://us.imdb.com/M/title-exact?Immortal%20Beloved%20(1994)|0|0|0|0|0|0|0|0|1|0|0|0|0|0|1|0|0|0|0
728|Junior (1994)|01-Jan-1994||http://us.imdb.com/M/title-exact?Junior%20(1994)|0|0|0|0|0|1|0|0|0|0|0|0|0|0|0|1|0|0|0
729|Nell (1994)|01-Jan-1994||http://us.imdb.com/M/title-exact?Nell%20(1994)|0|0|0|0|0|0|0|0|1|0|0|0|0|0|0|0|0|0|0
730|Queen Margot (Reine Margot, La) (1994)|01-Jan-1996||http://us.imdb.com/Title?Reine+Margot,+La+(1994)|0|0|0|0|0|0|0|0|1|0|0|0|0|0|1|0|0|0|0
731|Corrina, Corrina (1994)|01-Jan-1994||http://us.imdb.com/M/title-exact?Corrina,%20Corrina%20(1994)|0|0|0|0|0|1|0|0|1|0|0|0|0|0|1|0|0|0|0
732|Dave (1993)|01-Jan-1993||http://us.imdb.com/M/title-exact?Dave%20(1993)|0|0|0|0|0|1|0|0|0|0|0|0|0|0|1|0|0|0|0
733|Go Fish (1994)|01-Jan-1994||http://us.imdb.com/M/title-exact?Go%20Fish%20(1994)|0|0|0|0|0|0|0|0|1|0|0|0|0|0|1|0|0|0|0
734|Made in America (1993)|01-Jan-1993||http://us.imdb.com/M/title-exact?Made%20in%20America%20(1993)|0|0|0|0|0|1|0|0|0|0|0|0|0|0|0|0|0|0|0
735|Philadelphia (1993)|01-Jan-1993||http://us.imdb.com/M/title-exact?Philadelphia%20(1993)|0|0|0|0|0|0|0|0|1|0|0|0|0|0|0|0|0|0|0
736|Shadowlands (1993)|01-Jan-1993||http://us.imdb.com/M/title-exact?Shadowlands%20(1993)|0|0|0|0|0|0|0|0|1|0|0|0|0|0|1|0|0|0|0
737|Sirens (1994)|01-Jan-1994||http://us.imdb.com/M/title-exact?Sirens%20(1994)|0|0|0|0|0|1|0|0|1|0|0|0|0|0|0|0|0|0|0
738|Threesome (1994)|01-Jan-1994||http://us.imdb.com/M/title-exact?Threesome%20(1994)|0|0|0|0|0|1|0|0|0|0|0|0|0|0|1|0|0|0|0
739|Pretty Woman (1990)|01-Jan-1990||http://us.imdb.com/M/title-exact?Pretty%20Woman%20(1990)|0|0|0|0|0|1|0|0|0|0|0|0|0|0|1|0|0|0|0
740|Jane Eyre (1996)|05-Apr-1996||http://us.imdb.com/M/title-exact?Jane%20Eyre%20(1996)|0|0|0|0|0|0|0|0|1|0|0|0|0|0|1|0|0|0|0
741|Last Supper, The (1995)|05-Apr-1996||http://us.imdb.com/M/title-exact?Last%20Supper,%20The%20(1995)|0|0|0|0|0|0|0|0|1|0|0|0|0|0|0|0|1|0|0
742|Ransom (1996)|08-Nov-1996||http://us.imdb.com/M/title-exact?Ransom%20(1996)|0|0|0|0|0|0|0|0|1|0|0|0|0|0|0|0|1|0|0
743|Crow: City of Angels, The (1996)|30-Aug-1996||http://us.imdb.com/M/title-exact?Crow%3A%20City%20of%20Angels%2C%20The%20%281996%29|0|1|0|0|0|0|0|0|0|0|0|0|0|0|0|0|1|0|0
744|Michael Collins (1996)|11-Oct-1996||http://us.imdb.com/M/title-exact?Michael%20Collins%20(1996)|0|0|0|0|0|0|0|0|1|0|0|0|0|0|0|0|0|1|0
745|Ruling Class, The (1972)|01-Jan-1972||http://us.imdb.com/M/title-exact?Ruling%20Class,%20The%20(1972)|0|0|0|0|0|1|0|0|0|0|0|0|0|0|0|0|0|0|0
746|Real Genius (1985)|01-Jan-1985||http://us.imdb.com/M/title-exact?Real%20Genius%20(1985)|0|0|0|0|0|1|0|0|0|0|0|0|0|0|0|0|0|0|0
747|Benny & Joon (1993)|01-Jan-1993||http://us.imdb.com/M/title-exact?Benny%20&%20Joon%20(1993)|0|0|0|0|0|1|0|0|0|0|0|0|0|0|1|0|0|0|0
748|Saint, The (1997)|14-Mar-1997||http://us.imdb.com/M/title-exact?Saint%2C%20The%20(1997)|0|1|0|0|0|0|0|0|0|0|0|0|0|0|1|0|1|0|0
749|MatchMaker, The (1997)|01-Jan-1997||http://us.imdb.com/M/title-exact?Matchmaker%2C+The+(1997)|0|0|0|0|0|1|0|0|0|0|0|0|0|0|1|0|0|0|0
750|Amistad (1997)|18-Dec-1997||http://us.imdb.com/M/title-exact?imdb-title-118607|0|0|0|0|0|0|0|0|1|0|0|0|0|0|0|0|0|0|0
751|Tomorrow Never Dies (1997)|01-Jan-1997||http://us.imdb.com/M/title-exact?imdb-title-120347|0|1|0|0|0|0|0|0|0|0|0|0|0|0|1|0|1|0|0
752|Replacement Killers, The (1998)|06-Feb-1998||http://us.imdb.com/M/title-exact?Replacement+Killers%2C+The+(1998)|0|1|0|0|0|0|0|0|0|0|0|0|0|0|0|0|1|0|0
753|Burnt By the Sun (1994)|01-Jan-1994||http://us.imdb.com/M/title-exact?Utomlyonnye%20Solntsem%20(1994)|0|0|0|0|0|0|0|0|1|0|0|0|0|0|0|0|0|0|0
754|Red Corner (1997)|01-Jan-1997||http://us.imdb.com/M/title-exact?Red+Corner+(1997)|0|0|0|0|0|0|1|0|0|0|0|0|0|0|0|0|1|0|0
755|Jumanji (1995)|01-Jan-1995||http://us.imdb.com/M/title-exact?Jumanji%20(1995)|0|1|1|0|1|0|0|0|0|1|0|0|0|0|0|1|0|0|0
756|Father of the Bride Part II (1995)|01-Jan-1995||http://us.imdb.com/M/title-exact?Father%20of%20the%20Bride%20Part%20II%20(1995)|0|0|0|0|0|1|0|0|0|0|0|0|0|0|0|0|0|0|0
757|Across the Sea of Time (1995)|01-Jan-1995||http://us.imdb.com/M/title-exact?Across%20The%20Sea%20of%20Time%20(1995)|0|0|0|0|0|0|0|1|0|0|0|0|0|0|0|0|0|0|0
758|Lawnmower Man 2: Beyond Cyberspace (1996)|01-Jan-1996||http://us.imdb.com/M/title-exact?Lawnmower%20Man%202:%20Beyond%20Cyberspace%20(1996)|0|0|0|0|0|0|0|0|0|0|0|0|0|0|0|1|1|0|0
759|Fair Game (1995)|01-Jan-1995||http://us.imdb.com/M/title-exact?Fair%20Game%20(1995)|0|1|0|0|0|0|0|0|0|0|0|0|0|0|0|0|0|0|0
760|Screamers (1995)|01-Jan-1995||http://us.imdb.com/M/title-exact?Screamers%20(1995)|0|0|0|0|0|0|0|0|0|0|0|0|0|0|0|1|0|0|0
761|Nick of Time (1995)|01-Jan-1995||http://us.imdb.com/M/title-exact?Nick%20of%20Time%20(1995)|0|1|0|0|0|0|0|0|0|0|0|0|0|0|0|0|1|0|0
762|Beautiful Girls (1996)|09-Feb-1996||http://us.imdb.com/M/title-exact?Beautiful%20Girls%20(1996)|0|0|0|0|0|0|0|0|1|0|0|0|0|0|0|0|0|0|0
763|Happy Gilmore (1996)|16-Feb-1996||http://us.imdb.com/M/title-exact?Happy%20Gilmore%20(1996)|0|0|0|0|0|1|0|0|0|0|0|0|0|0|0|0|0|0|0
764|If Lucy Fell (1996)|08-Mar-1996||http://us.imdb.com/M/title-exact?If%20Lucy%20Fell%20(1996)|0|0|0|0|0|1|0|0|0|0|0|0|0|0|1|0|0|0|0
765|Boomerang (1992)|01-Jan-1992||http://us.imdb.com/M/title-exact?Boomerang%20(1992)|0|0|0|0|0|1|0|0|0|0|0|0|0|0|1|0|0|0|0
766|Man of the Year (1995)|01-Mar-1996||http://us.imdb.com/M/title-exact?Man%20of%20the%20Year%20(1995)|0|0|0|0|0|0|0|1|0|0|0|0|0|0|0|0|0|0|0
767|Addiction, The (1995)|01-Jan-1995||http://us.imdb.com/M/title-exact?Addiction,%20The%20(1995)|0|0|0|0|0|0|0|0|0|0|0|1|0|0|0|0|0|0|0
768|Casper (1995)|01-Jan-1995||http://us.imdb.com/M/title-exact?Casper%20(1995)|0|0|1|0|1|0|0|0|0|0|0|0|0|0|0|0|0|0|0
769|Congo (1995)|01-Jan-1995||http://us.imdb.com/M/title-exact?Congo%20(1995)|0|1|1|0|0|0|0|0|0|0|0|0|0|1|0|1|0|0|0
770|Devil in a Blue Dress (1995)|01-Jan-1995||http://us.imdb.com/M/title-exact?Devil%20in%20a%20Blue%20Dress%20(1995)|0|0|0|0|0|0|1|0|0|0|1|0|0|1|0|0|1|0|0
771|Johnny Mnemonic (1995)|01-Jan-1995||http://us.imdb.com/M/title-exact?Johnny%20Mnemonic%20(1995)|0|1|0|0|0|0|0|0|0|0|0|0|0|0|0|1|1|0|0
772|Kids (1995)|01-Jan-1995||http://us.imdb.com/M/title-exact?Kids%20(1995)|0|0|0|0|0|0|0|0|1|0|0|0|0|0|0|0|0|0|0
773|Mute Witness (1994)|01-Jan-1994||http://us.imdb.com/M/title-exact?Mute%20Witness%20(1994)|0|0|0|0|0|0|0|0|0|0|0|0|0|0|0|0|1|0|0
774|Prophecy, The (1995)|01-Jan-1995||http://us.imdb.com/M/title-exact?Prophecy,%20The%20(1995)|0|0|0|0|0|0|0|0|0|0|0|1|0|0|0|0|0|0|0
775|Something to Talk About (1995)|01-Jan-1995||http://us.imdb.com/M/title-exact?Something%20to%20Talk%20About%20(1995)|0|0|0|0|0|1|0|0|1|0|0|0|0|0|1|0|0|0|0
776|Three Wishes (1995)|01-Jan-1995||http://us.imdb.com/M/title-exact?Three%20Wishes%20(1995)|0|0|0|0|0|0|0|0|1|0|0|0|0|0|0|0|0|0|0
777|Castle Freak (1995)|01-Jan-1995||http://us.imdb.com/M/title-exact?Castle%20Freak%20(1995)|0|0|0|0|0|0|0|0|0|0|0|1|0|0|0|0|0|0|0
778|Don Juan DeMarco (1995)|01-Jan-1995||http://us.imdb.com/M/title-exact?Don%20Juan%20DeMarco%20and%20the%20Centerfold%20(1995)|0|0|0|0|0|1|0|0|1|0|0|0|0|0|1|0|0|0|0
779|Drop Zone (1994)|01-Jan-1994||http://us.imdb.com/M/title-exact?Drop%20Zone%20(1994)|0|1|0|0|0|0|0|0|0|0|0|0|0|0|0|0|0|0|0
780|Dumb & Dumber (1994)|01-Jan-1994||http://us.imdb.com/M/title-exact?Dumb%20&%20Dumber%20(1994)|0|0|0|0|0|1|0|0|0|0|0|0|0|0|0|0|0|0|0
781|French Kiss (1995)|01-Jan-1995||http://us.imdb.com/M/title-exact?French%20Kiss%20(1995)|0|0|0|0|0|1|0|0|0|0|0|0|0|0|1|0|0|0|0
782|Little Odessa (1994)|01-Jan-1994||http://us.imdb.com/M/title-exact?Little%20Odessa%20(1994)|0|0|0|0|0|0|0|0|1|0|0|0|0|0|0|0|0|0|0
783|Milk Money (1994)|01-Jan-1994||http://us.imdb.com/M/title-exact?Milk%20Money%20(1994)|0|0|0|0|0|1|0|0|0|0|0|0|0|0|1|0|0|0|0
784|Beyond Bedlam (1993)|01-Jan-1993||http://us.imdb.com/Title?Beyond+Bedlam+(1993)|0|0|0|0|0|0|0|0|1|0|0|1|0|0|0|0|0|0|0
785|Only You (1994)|01-Jan-1994||http://us.imdb.com/M/title-exact?Only%20You%20(1994)|0|0|0|0|0|1|0|0|0|0|0|0|0|0|1|0|0|0|0
786|Perez Family, The (1995)|01-Jan-1995||http://us.imdb.com/M/title-exact?Perez%20Family,%20The%20(1995)|0|0|0|0|0|1|0|0|0|0|0|0|0|0|1|0|0|0|0
787|Roommates (1995)|01-Jan-1995||http://us.imdb.com/M/title-exact?Roommates%20(1995)|0|0|0|0|0|1|0|0|1|0|0|0|0|0|0|0|0|0|0
788|Relative Fear (1994)|01-Jan-1994||http://us.imdb.com/M/title-exact?Relative%20Fear%20(1994)|0|0|0|0|0|0|0|0|0|0|0|1|0|0|0|0|1|0|0
789|Swimming with Sharks (1995)|01-Jan-1995||http://us.imdb.com/M/title-exact?Swimming%20with%20Sharks%20(1995)|0|0|0|0|0|1|0|0|1|0|0|0|0|0|0|0|0|0|0
790|Tommy Boy (1995)|01-Jan-1995||http://us.imdb.com/M/title-exact?Tommy%20Boy%20(1995)|0|0|0|0|0|1|0|0|0|0|0|0|0|0|0|0|0|0|0
791|Baby-Sitters Club, The (1995)|01-Jan-1995||http://us.imdb.com/M/title-exact?Baby-Sitters%20Club,%20The%20(1995)|0|0|0|0|1|0|0|0|0|0|0|0|0|0|0|0|0|0|0
792|Bullets Over Broadway (1994)|01-Jan-1994||http://us.imdb.com/M/title-exact?Bullets%20Over%20Broadway%20(1994)|0|0|0|0|0|1|0|0|0|0|0|0|0|0|0|0|0|0|0
793|Crooklyn (1994)|01-Jan-1994||http://us.imdb.com/M/title-exact?Crooklyn%20(1994)|0|0|0|0|0|1|0|0|0|0|0|0|0|0|0|0|0|0|0
794|It Could Happen to You (1994)|01-Jan-1994||http://us.imdb.com/M/title-exact?It%20Could%20Happen%20to%20You%20(1994)|0|0|0|0|0|0|0|0|1|0|0|0|0|0|1|0|0|0|0
795|Richie Rich (1994)|01-Jan-1994||http://us.imdb.com/M/title-exact?Richie%20Rich%20(1994)|0|0|0|0|1|1|0|0|0|0|0|0|0|0|0|0|0|0|0
796|Speechless (1994)|01-Jan-1994||http://us.imdb.com/M/title-exact?Speechless%20(1994)|0|0|0|0|0|1|0|0|0|0|0|0|0|0|1|0|0|0|0
797|Timecop (1994)|01-Jan-1994||http://us.imdb.com/M/title-exact?Timecop%20(1994)|0|1|0|0|0|0|0|0|0|0|0|0|0|0|0|1|0|0|0
798|Bad Company (1995)|01-Jan-1995||http://us.imdb.com/M/title-exact?Bad%20Company%20(1995)|0|1|0|0|0|0|0|0|0|0|0|0|0|0|0|0|0|0|0
799|Boys Life (1995)|01-Jan-1995||http://us.imdb.com/M/title-exact?Boys%20Life%20(1995)|0|0|0|0|0|0|0|0|1|0|0|0|0|0|0|0|0|0|0
800|In the Mouth of Madness (1995)|01-Jan-1995||http://us.imdb.com/M/title-exact?In%20the%20Mouth%20of%20Madness%20(1995)|0|0|0|0|0|0|0|0|0|0|0|1|0|0|0|0|1|0|0
801|Air Up There, The (1994)|01-Jan-1994||http://us.imdb.com/M/title-exact?Air%20Up%20There,%20The%20(1994)|0|0|0|0|0|1|0|0|0|0|0|0|0|0|0|0|0|0|0
802|Hard Target (1993)|01-Jan-1993||http://us.imdb.com/M/title-exact?Hard%20Target%20(1993)|0|1|1|0|0|0|1|0|0|0|0|0|0|0|0|0|1|0|0
803|Heaven & Earth (1993)|01-Jan-1993||http://us.imdb.com/M/title-exact?Heaven%20&%20Earth%20(1993)|0|1|0|0|0|0|0|0|1|0|0|0|0|0|0|0|0|1|0
804|Jimmy Hollywood (1994)|01-Jan-1994||http://us.imdb.com/M/title-exact?Jimmy%20Hollywood%20(1994)|0|0|0|0|0|1|0|0|0|0|0|0|0|0|0|0|0|0|0
805|Manhattan Murder Mystery (1993)|01-Jan-1993||http://us.imdb.com/M/title-exact?Manhattan%20Murder%20Mystery%20(1993)|0|0|0|0|0|1|0|0|0|0|0|0|0|1|0|0|0|0|0
806|Menace II Society (1993)|01-Jan-1993||http://us.imdb.com/M/title-exact?Menace%20II%20Society%20(1993)|0|1|0|0|0|0|1|0|1|0|0|0|0|0|0|0|0|0|0
807|Poetic Justice (1993)|01-Jan-1993||http://us.imdb.com/M/title-exact?Poetic%20Justice%20(1993)|0|0|0|0|0|0|0|0|1|0|0|0|0|0|0|0|0|0|0
808|Program, The (1993)|01-Jan-1993||http://us.imdb.com/M/title-exact?Program,%20The%20(1993)|0|1|0|0|0|0|0|0|1|0|0|0|0|0|0|0|0|0|0
809|Rising Sun (1993)|01-Jan-1993||http://us.imdb.com/M/title-exact?Rising%20Sun%20(1993)|0|1|0|0|0|0|0|0|1|0|0|0|0|1|0|0|0|0|0
810|Shadow, The (1994)|01-Jan-1994||http://us.imdb.com/M/title-exact?Shadow,%20The%20(1994)|0|1|0|0|0|0|0|0|0|0|0|0|0|0|0|0|0|0|0
811|Thirty-Two Short Films About Glenn Gould (1993)|01-Jan-1993||http://us.imdb.com/M/title-exact?Thirty-Two%20Short%20Films%20About%20Glenn%20Gould%20(1993)|0|0|0|0|0|0|0|1|0|0|0|0|0|0|0|0|0|0|0
812|Andre (1994)|01-Jan-1994||http://us.imdb.com/M/title-exact?Andre%20(1994)|0|0|1|0|1|0|0|0|0|0|0|0|0|0|0|0|0|0|0
813|Celluloid Closet, The (1995)|15-Mar-1996||http://us.imdb.com/M/title-exact?Celluloid%20Closet,%20The%20(1995)|0|0|0|0|0|0|0|1|0|0|0|0|0|0|0|0|0|0|0
814|Great Day in Harlem, A (1994)|01-Jan-1994||http://us.imdb.com/M/title-exact?Great%20Day%20in%20Harlem,%20A%20(1994)|0|0|0|0|0|0|0|1|0|0|0|0|0|0|0|0|0|0|0
815|One Fine Day (1996)|30-Nov-1996||http://us.imdb.com/M/title-exact?One%20Fine%20Day%20(1996)|0|0|0|0|0|0|0|0|1|0|0|0|0|0|1|0|0|0|0
816|Candyman: Farewell to the Flesh (1995)|01-Jan-1995||http://us.imdb.com/M/title-exact?Candyman:%20Farewell%20to%20the%20Flesh%20(1995)|0|0|0|0|0|0|0|0|0|0|0|1|0|0|0|0|0|0|0
817|Frisk (1995)|29-Mar-1996||http://us.imdb.com/M/title-exact?Frisk%20(1995)|0|0|0|0|0|0|0|0|1|0|0|0|0|0|0|0|0|0|0
818|Girl 6 (1996)|22-Mar-1996||http://us.imdb.com/M/title-exact?Girl%206%20(1996)|0|0|0|0|0|1|0|0|0|0|0|0|0|0|0|0|0|0|0
819|Eddie (1996)|31-May-1996||http://us.imdb.com/M/title-exact?Eddie%20(1996)|0|0|0|0|0|1|0|0|0|0|0|0|0|0|0|0|0|0|0
820|Space Jam (1996)|15-Nov-1996||http://us.imdb.com/M/title-exact?Space%20Jam%20(1996)|0|0|1|1|1|1|0|0|0|1|0|0|0|0|0|0|0|0|0
821|Mrs. Winterbourne (1996)|19-Apr-1996||http://us.imdb.com/M/title-exact?Mrs.%20Winterbourne%20(1996)|0|0|0|0|0|1|0|0|0|0|0|0|0|0|1|0|0|0|0
822|Faces (1968)|01-Jan-1968||http://us.imdb.com/M/title-exact?Faces%20(1968)|0|0|0|0|0|0|0|0|1|0|0|0|0|0|0|0|0|0|0
823|Mulholland Falls (1996)|26-Apr-1996||http://us.imdb.com/M/title-exact?Mulholland%20Falls%20(1996)|0|0|0|0|0|0|1|0|0|0|1|0|0|0|0|0|1|0|0
824|Great White Hype, The (1996)|03-May-1996||http://us.imdb.com/M/title-exact?Great%20White%20Hype,%20The%20(1996)|0|0|0|0|0|1|0|0|0|0|0|0|0|0|0|0|0|0|0
825|Arrival, The (1996)|31-May-1996||http://us.imdb.com/M/title-exact?Arrival,%20The%20(1996)|0|1|0|0|0|0|0|0|0|0|0|0|0|0|0|1|1|0|0
826|Phantom, The (1996)|07-Jun-1996||http://us.imdb.com/M/title-exact?Phantom,%20The%20(1996)|0|0|1|0|0|0|0|0|0|0|0|0|0|0|0|0|0|0|0
827|Daylight (1996)|06-Dec-1996||http://us.imdb.com/M/title-exact?Daylight%20(1996)|0|1|1|0|0|0|0|0|0|0|0|0|0|0|0|0|1|0|0
828|Alaska (1996)|21-Aug-1996||http://us.imdb.com/M/title-exact?Alaska%20(1996)|0|0|1|0|1|0|0|0|0|0|0|0|0|0|0|0|0|0|0
829|Fled (1996)|19-Jul-1996||http://us.imdb.com/M/title-exact?Fled%20(1996)|0|1|1|0|0|0|0|0|0|0|0|0|0|0|0|0|0|0|0
830|Power 98 (1995)|17-May-1996||http://us.imdb.com/M/title-exact?Power%2098%20(1995)|0|1|0|0|0|0|0|0|0|0|0|0|0|1|0|0|1|0|0
831|Escape from L.A. (1996)|09-Aug-1996||http://us.imdb.com/M/title-exact?Escape%20from%20L.A.%20(1996)|0|1|1|0|0|0|0|0|0|0|0|0|0|0|0|1|1|0|0
832|Bogus (1996)|06-Sep-1996||http://us.imdb.com/M/title-exact?Bogus%20(1996)|0|0|0|0|1|0|0|0|1|1|0|0|0|0|0|0|0|0|0
833|Bulletproof (1996)|06-Sep-1996||http://us.imdb.com/M/title-exact?Bulletproof%20(1996)|0|1|0|0|0|0|0|0|0|0|0|0|0|0|0|0|0|0|0
834|Halloween: The Curse of Michael Myers (1995)|01-Jan-1995||http://us.imdb.com/M/title-exact?Halloween:%20The%20Curse%20of%20Michael%20Myers%20(1995)|0|0|0|0|0|0|0|0|0|0|0|1|0|0|0|0|1|0|0
835|Gay Divorcee, The (1934)|01-Jan-1934||http://us.imdb.com/M/title-exact?Gay%20Divorcee%2C%20The%20%281934%29|0|0|0|0|0|1|0|0|0|0|0|0|1|0|1|0|0|0|0
836|Ninotchka (1939)|01-Jan-1939||http://us.imdb.com/M/title-exact?Ninotchka%20(1939)|0|0|0|0|0|1|0|0|0|0|0|0|0|0|1|0|0|0|0
837|Meet John Doe (1941)|01-Jan-1941||http://us.imdb.com/M/title-exact?Meet%20John%20Doe%20(1941)|0|0|0|0|0|0|0|0|1|0|0|0|0|0|0|0|0|0|0
838|In the Line of Duty 2 (1987)|30-Aug-1996||http://us.imdb.com/M/title-exact?In%20the%20Line%20of%20Duty%202%20(1987)|0|1|0|0|0|0|0|0|0|0|0|0|0|0|0|0|0|0|0
839|Loch Ness (1995)|01-Jan-1995||http://us.imdb.com/M/title-exact?Loch%20Ness%20(1995)|0|0|0|0|0|0|0|0|0|0|0|1|0|0|0|0|1|0|0
840|Last Man Standing (1996)|20-Sep-1996||http://us.imdb.com/M/title-exact?Last%20Man%20Standing%20(1996/I)|0|1|0|0|0|0|0|0|1|0|0|0|0|0|0|0|0|0|1
841|Glimmer Man, The (1996)|04-Oct-1996||http://us.imdb.com/M/title-exact?Glimmer%20Man,%20The%20(1996)|0|1|0|0|0|0|0|0|0|0|0|0|0|0|0|0|1|0|0
842|Pollyanna (1960)|01-Jan-1960||http://us.imdb.com/M/title-exact?Pollyanna%20(1960)|0|0|0|0|1|1|0|0|1|0|0|0|0|0|0|0|0|0|0
843|Shaggy Dog, The (1959)|01-Jan-1959||http://us.imdb.com/M/title-exact?Shaggy%20Dog,%20The%20(1959)|0|0|0|0|1|1|0|0|0|0|0|0|0|0|0|0|0|0|0
844|Freeway (1996)|23-Aug-1996||http://us.imdb.com/M/title-exact?Freeway%20(1996)|0|0|0|0|0|0|1|0|0|0|0|0|0|0|0|0|0|0|0
845|That Thing You Do! (1996)|28-Sep-1996||http://us.imdb.com/M/title-exact?That%20Thing%20You%20Do!%20(1996)|0|0|0|0|0|1|0|0|0|0|0|0|0|0|0|0|0|0|0
846|To Gillian on Her 37th Birthday (1996)|18-Oct-1996||http://us.imdb.com/M/title-exact?To%20Gillian%20on%20Her%2037th%20Birthday%20(1996)|0|0|0|0|0|0|0|0|1|0|0|0|0|0|1|0|0|0|0
847|Looking for Richard (1996)|11-Oct-1996||http://us.imdb.com/M/title-exact?Looking%20for%20Richard%20(1996)|0|0|0|0|0|0|0|1|1|0|0|0|0|0|0|0|0|0|0
848|Murder, My Sweet (1944)|01-Jan-1944||http://us.imdb.com/M/title-exact?Murder,%20My%20Sweet%20(1944)|0|0|0|0|0|0|0|0|0|0|1|0|0|0|0|0|1|0|0
849|Days of Thunder (1990)|01-Jan-1990||http://us.imdb.com/M/title-exact?Days%20of%20Thunder%20(1990)|0|1|0|0|0|0|0|0|0|0|0|0|0|0|1|0|0|0|0
850|Perfect Candidate, A (1996)|27-Sep-1996||http://us.imdb.com/M/title-exact?Perfect%20Candidate,%20A%20(1996)|0|0|0|0|0|0|0|1|0|0|0|0|0|0|0|0|0|0|0
851|Two or Three Things I Know About Her (1966)|01-Jan-1966||http://us.imdb.com/M/title-exact?Deux%20ou%20trois%20choses%20que%20je%20sais%20d'elle%20(1966)|0|0|0|0|0|0|0|0|1|0|0|0|0|0|0|0|0|0|0
852|Bloody Child, The (1996)|26-Oct-1996||http://us.imdb.com/M/title-exact?Bloody%20Child%2C%20The%20%281996%29|0|0|0|0|0|0|0|0|1|0|0|0|0|0|0|0|1|0|0
853|Braindead (1992)|01-Jan-1992||http://us.imdb.com/M/title-exact?Braindead%20(1992)|0|0|0|0|0|1|0|0|0|0|0|1|0|0|0|0|0|0|0
854|Bad Taste (1987)|01-Jan-1987||http://us.imdb.com/M/title-exact?Bad%20Taste%20(1987)|0|0|0|0|0|1|0|0|0|0|0|1|0|0|0|0|0|0|0
855|Diva (1981)|01-Jan-1981||http://us.imdb.com/M/title-exact?Diva%20(1981)|0|1|0|0|0|0|0|0|1|0|0|0|0|1|1|0|1|0|0
856|Night on Earth (1991)|01-Jan-1991||http://us.imdb.com/M/title-exact?Night%20on%20Earth%20(1991)|0|0|0|0|0|1|0|0|1|0|0|0|0|0|0|0|0|0|0
857|Paris Was a Woman (1995)|08-Nov-1996||http://us.imdb.com/M/title-exact?Paris%20Was%20a%20Woman%20(1995)|0|0|0|0|0|0|0|1|0|0|0|0|0|0|0|0|0|0|0
858|Amityville: Dollhouse (1996)|01-Jan-1996||http://us.imdb.com/M/title-exact?Amityville:%20Dollhouse%20(1996)|0|0|0|0|0|0|0|0|0|0|0|1|0|0|0|0|0|0|0
859|April Fool's Day (1986)|01-Jan-1986||http://us.imdb.com/M/title-exact?April%20Fool's%20Day%20(1986)|0|0|0|0|0|1|0|0|0|0|0|1|0|0|0|0|0|0|0
860|Believers, The (1987)|01-Jan-1987||http://us.imdb.com/M/title-exact?Believers,%20The%20(1987)|0|0|0|0|0|0|0|0|0|0|0|1|0|0|0|0|1|0|0
861|Nosferatu a Venezia (1986)|01-Jan-1986||http://us.imdb.com/M/title-exact?Nosferatu%20a%20Venezia%20(1986)|0|0|0|0|0|0|0|0|0|0|0|1|0|0|0|0|0|0|0
862|Jingle All the Way (1996)|22-Nov-1996||http://us.imdb.com/M/title-exact?Jingle%20All%20the%20Way%20(1996)|0|0|1|0|1|1|0|0|0|0|0|0|0|0|0|0|0|0|0
863|Garden of Finzi-Contini, The (Giardino dei Finzi-Contini, Il) (1970)|08-Nov-1996||http://us.imdb.com/M/title-exact?Giardino%20dei%20Finzi-Contini,%20Il%20(1970)|0|0|0|0|0|0|0|0|1|0|0|0|0|0|0|0|0|0|0
864|My Fellow Americans (1996)|20-Dec-1996||http://us.imdb.com/M/title-exact?My%20Fellow%20Americans%20(1996)|0|0|0|0|0|1|0|0|0|0|0|0|0|0|0|0|0|0|0
865|Ice Storm, The (1997)|01-Jan-1997||http://us.imdb.com/M/title-exact?Ice+Storm%2C+The+(1997)|0|0|0|0|0|0|0|0|1|0|0|0|0|0|0|0|0|0|0
866|Michael (1996)|25-Dec-1996||http://us.imdb.com/M/title-exact?Michael%20(1996)|0|0|0|0|0|1|0|0|0|0|0|0|0|0|1|0|0|0|0
867|Whole Wide World, The (1996)|25-Dec-1996||http://us.imdb.com/M/title-exact?Whole%20Wide%20World,%20The%20(1996)|0|0|0|0|0|0|0|0|1|0|0|0|0|0|0|0|0|0|0
868|Hearts and Minds (1996)|10-Jan-1997||http://us.imdb.com/M/title-exact?Hearts%20and%20Minds%20(1996)|0|0|0|0|0|0|0|0|1|0|0|0|0|0|0|0|0|0|0
869|Fools Rush In (1997)|14-Feb-1997||http://us.imdb.com/M/title-exact?Fools%20Rush%20In%20(1997)|0|0|0|0|0|1|0|0|0|0|0|0|0|0|1|0|0|0|0
870|Touch (1997)|14-Feb-1997||http://us.imdb.com/M/title-exact?Touch%20(1997)|0|0|0|0|0|0|0|0|0|0|0|0|0|0|1|0|0|0|0
871|Vegas Vacation (1997)|14-Feb-1997||http://us.imdb.com/M/title-exact?Vegas%20Vacation%20(1997)|0|0|0|0|0|1|0|0|0|0|0|0|0|0|0|0|0|0|0
872|Love Jones (1997)|14-Mar-1997||http://us.imdb.com/M/title-exact?Love%20Jones%20(1997)|0|0|0|0|0|0|0|0|0|0|0|0|0|0|1|0|0|0|0
873|Picture Perfect (1997)|01-Aug-1997||http://us.imdb.com/M/title-exact?Picture+Perfect+(1997)|0|0|0|0|0|1|0|0|0|0|0|0|0|0|1|0|0|0|0
874|Career Girls (1997)|08-Aug-1997||http://us.imdb.com/M/title-exact?Career+Girls+(1997)|0|0|0|0|0|0|0|0|1|0|0|0|0|0|0|0|0|0|0
875|She's So Lovely (1997)|22-Aug-1997||http://us.imdb.com/M/title-exact?She%27s+So+Lovely+(1997)|0|0|0|0|0|0|0|0|1|0|0|0|0|0|1|0|0|0|0
876|Money Talks (1997)|22-Aug-1997||http://us.imdb.com/M/title-exact?Money+Talks+(1997)|0|1|0|0|0|1|0|0|0|0|0|0|0|0|0|0|0|0|0
877|Excess Baggage (1997)|01-Jan-1997||http://us.imdb.com/M/title-exact?Excess+Baggage+(1997)|0|0|1|0|0|0|0|0|0|0|0|0|0|0|1|0|0|0|0
878|That Darn Cat! (1997)|14-Feb-1997||http://us.imdb.com/M/title-exact?That%20Darn%20Cat%20(1997)|0|0|0|0|1|1|0|0|0|0|0|0|0|1|0|0|0|0|0
879|Peacemaker, The (1997)|01-Jan-1997||http://us.imdb.com/M/title-exact?Peacemaker%2C+The+(1997)|0|1|0|0|0|0|0|0|0|0|0|0|0|0|0|0|1|1|0
880|Soul Food (1997)|01-Jan-1997||http://us.imdb.com/M/title-exact?Soul+Food+(1997)|0|0|0|0|0|0|0|0|1|0|0|0|0|0|0|0|0|0|0
881|Money Talks (1997)|22-Aug-1997||http://us.imdb.com/M/title-exact?Money+Talks+(1997)|0|1|0|0|0|1|0|0|0|0|0|0|0|0|0|0|0|0|0
882|Washington Square (1997)|01-Jan-1997||http://us.imdb.com/M/title-exact?Washington+Square+(1997)|0|0|0|0|0|0|0|0|1|0|0|0|0|0|0|0|0|0|0
883|Telling Lies in America (1997)|01-Jan-1997||http://us.imdb.com/M/title-exact?Telling+Lies+in+America+(1997)|0|0|0|0|0|0|0|0|1|0|0|0|0|0|0|0|0|0|0
884|Year of the Horse (1997)|01-Jan-1997||http://us.imdb.com/M/title-exact?Year+of+the+Horse+(1997)|0|0|0|0|0|0|0|1|0|0|0|0|0|0|0|0|0|0|0
885|Phantoms (1998)|01-Jan-1998||http://us.imdb.com/M/title-exact?Phantoms+(1998)|0|0|0|0|0|0|0|0|0|0|0|1|0|0|0|0|0|0|0
886|Life Less Ordinary, A (1997)|01-Jan-1997||http://us.imdb.com/M/title-exact?Life+Less+Ordinary,+A+(1997)|0|0|0|0|0|0|0|0|0|0|0|0|0|0|1|0|1|0|0
887|Eve's Bayou (1997)|01-Jan-1997||http://us.imdb.com/M/title-exact?Eve's+Bayou+(1997)|0|0|0|0|0|0|0|0|1|0|0|0|0|0|0|0|0|0|0
888|One Night Stand (1997)|01-Jan-1997||http://us.imdb.com/M/title-exact?One+Night+Stand+(1997)|0|0|0|0|0|0|0|0|1|0|0|0|0|0|0|0|0|0|0
889|Tango Lesson, The (1997)|01-Jan-1997||http://us.imdb.com/M/title-exact?Tango+Lesson,+The+(1997)|0|0|0|0|0|0|0|0|0|0|0|0|0|0|1|0|0|0|0
890|Mortal Kombat: Annihilation (1997)|01-Jan-1997||http://us.imdb.com/M/title-exact?Mortal+Kombat%3A+Annihilation+(1997)|0|1|1|0|0|0|0|0|0|0|0|0|0|0|0|0|0|0|0
891|Bent (1997)|18-Dec-1997||http://us.imdb.com/M/title-exact?imdb-title-118698|0|0|0|0|0|0|0|0|1|0|0|0|0|0|0|0|0|1|0
892|Flubber (1997)|01-Jan-1997||http://us.imdb.com/M/title-exact?imdb-title-119137|0|0|0|0|1|1|0|0|0|1|0|0|0|0|0|0|0|0|0
893|For Richer or Poorer (1997)|01-Jan-1997||http://us.imdb.com/M/title-exact?imdb-title-119142|0|0|0|0|0|1|0|0|0|0|0|0|0|0|0|0|0|0|0
894|Home Alone 3 (1997)|01-Jan-1997||http://us.imdb.com/M/title-exact?imdb-title-119303|0|0|0|0|1|1|0|0|0|0|0|0|0|0|0|0|0|0|0
895|Scream 2 (1997)|01-Jan-1997||http://us.imdb.com/M/title-exact?imdb-title-120082|0|0|0|0|0|0|0|0|0|0|0|1|0|0|0|0|1|0|0
896|Sweet Hereafter, The (1997)|01-Jan-1997||http://us.imdb.com/M/title-exact?Sweet+Hereafter%2C+The+(1997)|0|0|0|0|0|0|0|0|1|0|0|0|0|0|0|0|0|0|0
897|Time Tracers (1995)|01-Jan-1995||http://us.imdb.com/M/title-exact?imdb-title-128755|0|1|1|0|0|0|0|0|0|0|0|0|0|0|0|1|0|0|0
898|Postman, The (1997)|01-Jan-1997||http://us.imdb.com/M/title-exact?imdb-title-119925|0|0|0|0|0|0|0|0|1|0|0|0|0|0|0|0|0|0|0
899|Winter Guest, The (1997)|01-Jan-1997||http://us.imdb.com/M/title-exact?imdb-title-120521|0|0|0|0|0|0|0|0|1|0|0|0|0|0|0|0|0|0|0
900|Kundun (1997)|25-Dec-1997||http://us.imdb.com/M/title-exact?imdb-title-119485|0|0|0|0|0|0|0|0|1|0|0|0|0|0|0|0|0|0|0
901|Mr. Magoo (1997)|25-Dec-1997||http://us.imdb.com/M/title-exact?imdb-title-119718|0|0|0|0|0|1|0|0|0|0|0|0|0|0|0|0|0|0|0
902|Big Lebowski, The (1998)|26-Dec-1997||http://us.imdb.com/M/title-exact?imdb-title-118715|0|0|0|0|0|1|1|0|0|0|0|0|0|1|0|0|1|0|0
903|Afterglow (1997)|26-Dec-1997||http://us.imdb.com/M/title-exact?imdb-title-118566|0|0|0|0|0|0|0|0|1|0|0|0|0|0|1|0|0|0|0
904|Ma vie en rose (My Life in Pink) (1997)|26-Dec-1997||http://us.imdb.com/M/title-exact?imdb-title-119590|0|0|0|0|0|1|0|0|1|0|0|0|0|0|0|0|0|0|0
905|Great Expectations (1998)|01-Jan-1998||http://us.imdb.com/M/title-exact?imdb-title-119223|0|0|0|0|0|0|0|0|1|0|0|0|0|0|1|0|0|0|0
906|Oscar & Lucinda (1997)|31-Dec-1997||http://us.imdb.com/M/title-exact?imdb-title-119843|0|0|0|0|0|0|0|0|1|0|0|0|0|0|1|0|0|0|0
907|Vermin (1998)|01-Jan-1997||http://us.imdb.com/M/title-exact?imdb-title-120881|0|0|0|0|0|1|0|0|0|0|0|0|0|0|0|0|0|0|0
908|Half Baked (1998)|16-Jan-1998||http://us.imdb.com/M/title-exact?imdb-title-120693|0|0|0|0|0|1|0|0|0|0|0|0|0|0|0|0|0|0|0
909|Dangerous Beauty (1998)|23-Jan-1998||http://us.imdb.com/M/title-exact?imdb-title-118892|0|0|0|0|0|0|0|0|1|0|0|0|0|0|0|0|0|0|0
910|Nil By Mouth (1997)|06-Feb-1998||http://us.imdb.com/Title?Nil+By+Mouth+(1997)|0|0|0|0|0|0|0|0|1|0|0|0|0|0|0|0|0|0|0
911|Twilight (1998)|30-Jan-1998||http://us.imdb.com/M/title-exact?imdb-title-119594|0|0|0|0|0|0|1|0|1|0|0|0|0|0|0|0|0|0|0
912|U.S. Marshalls (1998)|10-Mar-1998||http://us.imdb.com/Title?U.S.+Marshals+(1998)|0|1|0|0|0|0|0|0|0|0|0|0|0|0|0|0|1|0|0
913|Love and Death on Long Island (1997)|10-Mar-1998||http://us.imdb.com/Title?Love+and+Death+on+Long+Island+(1997)|0|0|0|0|0|1|0|0|0|0|0|0|0|0|0|0|0|0|0
914|Wild Things (1998)|14-Mar-1998||http://us.imdb.com/Title?Wild+Things+(1998)|0|0|0|0|0|0|1|0|1|0|0|0|0|1|0|0|1|0|0
915|Primary Colors (1998)|20-Mar-1998||http://us.imdb.com/Title?Primary+Colors+(1998)|0|0|0|0|0|0|0|0|1|0|0|0|0|0|0|0|0|0|0
916|Lost in Space (1998)|27-Mar-1998||http://us.imdb.com/Title?Lost+in+Space+(1998)|0|1|0|0|0|0|0|0|0|0|0|0|0|0|0|1|1|0|0
917|Mercury Rising (1998)|27-Mar-1998||http://us.imdb.com/Title?Mercury+Rising+(1998)|0|1|0|0|0|0|0|0|1|0|0|0|0|0|0|0|1|0|0
918|City of Angels (1998)|03-Apr-1998||http://us.imdb.com/Title?City+of+Angels+(1998)|0|0|0|0|0|0|0|0|0|0|0|0|0|0|1|0|0|0|0
919|City of Lost Children, The (1995)|01-Jan-1995||http://us.imdb.com/Title?Cit%E9+des+enfants+perdus,+La+(1995)|0|0|1|0|0|0|0|0|0|0|0|0|0|0|0|1|0|0|0
920|Two Bits (1995)|01-Jan-1995||http://us.imdb.com/M/title-exact?Two%20Bits%20(1995)|0|0|0|0|0|0|0|0|1|0|0|0|0|0|0|0|0|0|0
921|Farewell My Concubine (1993)|01-Jan-1993||http://us.imdb.com/M/title-exact?Ba%20Wang%20Bie%20Ji%20(1993)|0|0|0|0|0|0|0|0|1|0|0|0|0|0|1|0|0|0|0
922|Dead Man (1995)|10-May-1996||http://us.imdb.com/M/title-exact?Dead%20Man%20(1995)|0|0|0|0|0|0|0|0|0|0|0|0|0|0|0|0|0|0|1
923|Raise the Red Lantern (1991)|01-Jan-1991||http://us.imdb.com/M/title-exact?Da%20Hong%20Deng%20Long%20Gao%20Gao%20Gua%20(1991)|0|0|0|0|0|0|0|0|1|0|0|0|0|0|0|0|0|0|0
924|White Squall (1996)|01-Jan-1996||http://us.imdb.com/M/title-exact?White%20Squall%20(1996)|0|0|1|0|0|0|0|0|1|0|0|0|0|0|0|0|0|0|0
925|Unforgettable (1996)|23-Feb-1996||http://us.imdb.com/Title?Unforgettable+(1996)|0|0|0|0|0|0|0|0|0|0|0|0|0|0|0|1|1|0|0
926|Down Periscope (1996)|01-Mar-1996||http://us.imdb.com/M/title-exact?Down%20Periscope%20(1996)|0|0|0|0|0|1|0|0|0|0|0|0|0|0|0|0|0|0|0
927|Flower of My Secret, The (Flor de mi secreto, La) (1995)|08-Mar-1996||http://us.imdb.com/M/title-exact?Flor%20de%20mi%20secreto,%20La%20(1995)|0|0|0|0|0|0|0|0|1|0|0|0|0|0|0|0|0|0|0
928|Craft, The (1996)|26-Apr-1996||http://us.imdb.com/M/title-exact?Craft,%20The%20(1996)|0|0|0|0|0|0|0|0|1|0|0|1|0|0|0|0|0|0|0
929|Harriet the Spy (1996)|03-Jul-1996||http://us.imdb.com/M/title-exact?Harriet%20the%20Spy%20(1996)|0|0|0|0|1|1|0|0|0|0|0|0|0|0|0|0|0|0|0
930|Chain Reaction (1996)|31-Jul-1996||http://us.imdb.com/M/title-exact?Chain%20Reaction%20(1996)|0|1|1|0|0|0|0|0|0|0|0|0|0|0|0|0|1|0|0
931|Island of Dr. Moreau, The (1996)|23-Aug-1996||http://us.imdb.com/M/title-exact?Island%20of%20Dr.%20Moreau,%20The%20(1996)|0|0|0|0|0|0|0|0|0|0|0|0|0|0|0|1|1|0|0
932|First Kid (1996)|30-Aug-1996||http://us.imdb.com/M/title-exact?First%20Kid%20(1996)|0|0|0|0|1|1|0|0|0|0|0|0|0|0|0|0|0|0|0
933|Funeral, The (1996)|25-Oct-1996||http://us.imdb.com/M/title-exact?Funeral,%20The%20(1996)|0|0|0|0|0|0|0|0|1|0|0|0|0|0|0|0|0|0|0
934|Preacher's Wife, The (1996)|13-Dec-1996||http://us.imdb.com/M/title-exact?Preacher's%20Wife,%20The%20(1996)|0|0|0|0|0|0|0|0|1|0|0|0|0|0|0|0|0|0|0
935|Paradise Road (1997)|18-Apr-1997||http://us.imdb.com/M/title-exact?Paradise%20Road%20%281997%29|0|0|0|0|0|0|0|0|1|0|0|0|0|0|0|0|0|1|0
936|Brassed Off (1996)|13-Jun-1997||http://us.imdb.com/M/title-exact?Brassed%20Off%20%281996%29|0|0|0|0|0|1|0|0|1|0|0|0|0|0|1|0|0|0|0
937|Thousand Acres, A (1997)|01-Jan-1997||http://us.imdb.com/M/title-exact?Thousand+Acres%2C+A+(1997)|0|0|0|0|0|0|0|0|1|0|0|0|0|0|0|0|0|0|0
938|Smile Like Yours, A (1997)|01-Jan-1997||http://us.imdb.com/M/title-exact?Smile+Like+Yours%2C+A+(1997)|0|0|0|0|0|1|0|0|0|0|0|0|0|0|1|0|0|0|0
939|Murder in the First (1995)|01-Jan-1995||http://us.imdb.com/M/title-exact?Murder%20in%20the%20First%20(1995)|0|0|0|0|0|0|0|0|1|0|0|0|0|0|0|0|1|0|0
940|Airheads (1994)|01-Jan-1994||http://us.imdb.com/M/title-exact?Airheads%20(1994)|0|0|0|0|0|1|0|0|0|0|0|0|0|0|0|0|0|0|0
941|With Honors (1994)|01-Jan-1994||http://us.imdb.com/M/title-exact?With%20Honors%20(1994)|0|0|0|0|0|1|0|0|1|0|0|0|0|0|0|0|0|0|0
942|What's Love Got to Do with It (1993)|01-Jan-1993||http://us.imdb.com/M/title-exact?What's%20Love%20Got%20to%20Do%20with%20It%20(1993)|0|0|0|0|0|0|0|0|1|0|0|0|0|0|0|0|0|0|0
943|Killing Zoe (1994)|01-Jan-1994||http://us.imdb.com/M/title-exact?Killing%20Zoe%20(1994)|0|0|0|0|0|0|0|0|0|0|0|0|0|0|0|0|1|0|0
944|Renaissance Man (1994)|01-Jan-1994||http://us.imdb.com/M/title-exact?Renaissance%20Man%20(1994)|0|0|0|0|0|1|0|0|1|0|0|0|0|0|0|0|0|1|0
945|Charade (1963)|01-Jan-1963||http://us.imdb.com/M/title-exact?Charade%20(1963)|0|0|0|0|0|1|0|0|0|0|0|0|0|1|1|0|1|0|0
946|Fox and the Hound, The (1981)|01-Jan-1981||http://us.imdb.com/M/title-exact?Fox%20and%20the%20Hound,%20The%20(1981)|0|0|0|1|1|0|0|0|0|0|0|0|0|0|0|0|0|0|0
947|Big Blue, The (Grand bleu, Le) (1988)|01-Jan-1988||http://us.imdb.com/M/title-exact?Grand%20bleu,%20Le%20(1988)|0|0|1|0|0|0|0|0|0|0|0|0|0|0|1|0|0|0|0
948|Booty Call (1997)|28-Feb-1997||http://us.imdb.com/M/title-exact?Booty%20Call%20(1997)|0|0|0|0|0|1|0|0|0|0|0|0|0|0|1|0|0|0|0
949|How to Make an American Quilt (1995)|01-Jan-1995||http://us.imdb.com/M/title-exact?How%20to%20Make%20an%20American%20Quilt%20(1995)|0|0|0|0|0|0|0|0|1|0|0|0|0|0|1|0|0|0|0
950|Georgia (1995)|01-Jan-1995||http://us.imdb.com/M/title-exact?Georgia%20(1995)|0|0|0|0|0|0|0|0|1|0|0|0|0|0|0|0|0|0|0
951|Indian in the Cupboard, The (1995)|01-Jan-1995||http://us.imdb.com/M/title-exact?Indian%20in%20the%20Cupboard,%20The%20(1995)|0|0|1|0|1|0|0|0|0|1|0|0|0|0|0|0|0|0|0
952|Blue in the Face (1995)|01-Jan-1995||http://us.imdb.com/M/title-exact?Blue%20in%20the%20Face%20(1995)|0|0|0|0|0|1|0|0|0|0|0|0|0|0|0|0|0|0|0
953|Unstrung Heroes (1995)|01-Jan-1995||http://us.imdb.com/M/title-exact?Unstrung%20Heroes%20(1995)|0|0|0|0|0|1|0|0|1|0|0|0|0|0|0|0|0|0|0
954|Unzipped (1995)|01-Jan-1995||http://us.imdb.com/M/title-exact?Unzipped%20(1995)|0|0|0|0|0|0|0|1|0|0|0|0|0|0|0|0|0|0|0
955|Before Sunrise (1995)|01-Jan-1995||http://us.imdb.com/M/title-exact?Before%20Sunrise%20(1995)|0|0|0|0|0|0|0|0|1|0|0|0|0|0|1|0|0|0|0
956|Nobody's Fool (1994)|01-Jan-1994||http://us.imdb.com/M/title-exact?Nobody's%20Fool%20(1994)|0|0|0|0|0|0|0|0|1|0|0|0|0|0|0|0|0|0|0
957|Pushing Hands (1992)|01-Jan-1992||http://us.imdb.com/M/title-exact?Tui%20Shou%20(1992)|0|0|0|0|0|1|0|0|0|0|0|0|0|0|0|0|0|0|0
958|To Live (Huozhe) (1994)|01-Jan-1994||http://us.imdb.com/M/title-exact?Huozhe%20(1994)|0|0|0|0|0|0|0|0|1|0|0|0|0|0|0|0|0|0|0
959|Dazed and Confused (1993)|01-Jan-1993||http://us.imdb.com/M/title-exact?Dazed%20and%20Confused%20(1993)|0|0|0|0|0|1|0|0|0|0|0|0|0|0|0|0|0|0|0
960|Naked (1993)|01-Jan-1993||http://us.imdb.com/M/title-exact?Naked%20(1993)|0|0|0|0|0|0|0|0|1|0|0|0|0|0|0|0|0|0|0
961|Orlando (1993)|01-Jan-1993||http://us.imdb.com/M/title-exact?Orlando%20(1993)|0|0|0|0|0|0|0|0|1|0|0|0|0|0|0|0|0|0|0
962|Ruby in Paradise (1993)|01-Jan-1993||http://us.imdb.com/M/title-exact?Ruby%20in%20Paradise%20(1993)|0|0|0|0|0|0|0|0|1|0|0|0|0|0|0|0|0|0|0
963|Some Folks Call It a Sling Blade (1993)|01-Jan-1993||http://us.imdb.com/M/title-exact?Some%20Folks%20Call%20It%20a%20Sling%20Blade%20(1993)|0|0|0|0|0|0|0|0|1|0|0|0|0|0|0|0|1|0|0
964|Month by the Lake, A (1995)|01-Jan-1995||http://us.imdb.com/M/title-exact?Month%20by%20The%20Lake,%20A%20(1995)|0|0|0|0|0|1|0|0|1|0|0|0|0|0|0|0|0|0|0
965|Funny Face (1957)|01-Jan-1957||http://us.imdb.com/M/title-exact?Funny%20Face%20(1957)|0|0|0|0|0|1|0|0|0|0|0|0|1|0|0|0|0|0|0
966|Affair to Remember, An (1957)|01-Jan-1957||http://us.imdb.com/M/title-exact?Affair%20to%20Remember,%20An%20(1957)|0|0|0|0|0|0|0|0|0|0|0|0|0|0|1|0|0|0|0
967|Little Lord Fauntleroy (1936)|01-Jan-1936||http://us.imdb.com/M/title-exact?Little%20Lord%20Fauntleroy%20(1936)|0|0|0|0|0|0|0|0|1|0|0|0|0|0|0|0|0|0|0
968|Inspector General, The (1949)|01-Jan-1949||http://us.imdb.com/M/title-exact?Inspector%20General,%20The%20(1949)|0|0|0|0|0|0|0|0|0|0|0|0|1|0|0|0|0|0|0
969|Winnie the Pooh and the Blustery Day (1968)|01-Jan-1968||http://us.imdb.com/M/title-exact?Winnie%20the%20Pooh%20and%20the%20Blustery%20Day%20%281968%29|0|0|0|1|1|0|0|0|0|0|0|0|0|0|0|0|0|0|0
970|Hear My Song (1991)|01-Jan-1991||http://us.imdb.com/M/title-exact?Hear%20My%20Song%20(1991)|0|0|0|0|0|1|0|0|0|0|0|0|0|0|0|0|0|0|0
971|Mediterraneo (1991)|01-Jan-1991||http://us.imdb.com/M/title-exact?Mediterraneo%20(1991)|0|0|0|0|0|1|0|0|0|0|0|0|0|0|0|0|0|1|0
972|Passion Fish (1992)|01-Jan-1992||http://us.imdb.com/M/title-exact?Passion%20Fish%20(1992)|0|0|0|0|0|0|0|0|1|0|0|0|0|0|0|0|0|0|0
973|Grateful Dead (1995)|18-Oct-1996||http://us.imdb.com/M/title-exact?Grateful%20Dead%20(1995)|0|0|0|0|0|0|0|1|0|0|0|0|0|0|0|0|0|0|0
974|Eye for an Eye (1996)|01-Jan-1996||http://us.imdb.com/Title?Eye+for+an+Eye+(1996)|0|0|0|0|0|0|0|0|1|0|0|0|0|0|0|0|1|0|0
975|Fear (1996)|12-Apr-1996||http://us.imdb.com/M/title-exact?Fear%20(1996)|0|0|0|0|0|0|0|0|0|0|0|0|0|0|0|0|1|0|0
976|Solo (1996)|23-Aug-1996||http://us.imdb.com/M/title-exact?Solo%20(1996)|0|1|0|0|0|0|0|0|0|0|0|0|0|0|0|1|1|0|0
977|Substitute, The (1996)|19-Apr-1996||http://us.imdb.com/M/title-exact?Substitute,%20The%20(1996)|0|1|0|0|0|0|0|0|0|0|0|0|0|0|0|0|0|0|0
978|Heaven's Prisoners (1996)|10-May-1996||http://us.imdb.com/M/title-exact?Heaven's%20Prisoners%20(1996)|0|0|0|0|0|0|0|0|0|0|0|0|0|1|0|0|1|0|0
979|Trigger Effect, The (1996)|30-Aug-1996||http://us.imdb.com/M/title-exact?Trigger%20Effect,%20The%20(1996)|0|0|0|0|0|0|0|0|1|0|0|0|0|0|0|0|1|0|0
980|Mother Night (1996)|01-Nov-1996||http://us.imdb.com/M/title-exact?Mother%20Night%20(1996)|0|0|0|0|0|0|0|0|1|0|0|0|0|0|0|0|0|0|0
981|Dangerous Ground (1997)|04-Sep-1996||http://us.imdb.com/M/title-exact?Dangerous%20Ground%20(1997)|0|0|0|0|0|0|0|0|1|0|0|0|0|0|0|0|0|0|0
982|Maximum Risk (1996)|13-Sep-1996||http://us.imdb.com/M/title-exact?Maximum%20Risk%20(1996)|0|1|1|0|0|0|0|0|0|0|0|0|0|0|0|0|1|0|0
983|Rich Man's Wife, The (1996)|13-Sep-1996||http://us.imdb.com/M/title-exact?Rich%20Man's%20Wife,%20The%20(1996)|0|0|0|0|0|0|0|0|0|0|0|0|0|0|0|0|1|0|0
984|Shadow Conspiracy (1997)|31-Jan-1997||http://us.imdb.com/M/title-exact?Shadow%20Conspiracy%20(1997)|0|0|0|0|0|0|0|0|0|0|0|0|0|0|0|0|1|0|0
985|Blood & Wine (1997)|15-Nov-1996||http://us.imdb.com/Title?Blood+%26+Wine+(1997)|0|0|0|0|0|0|0|0|1|0|0|0|0|0|0|0|0|0|0
986|Turbulence (1997)|10-Jan-1997||http://us.imdb.com/M/title-exact?Turbulence%20(1997)|0|0|0|0|0|0|0|0|0|0|0|0|0|0|0|0|1|0|0
987|Underworld (1997)|09-May-1997||http://us.imdb.com/M/title-exact?Underworld%20(1997)|0|0|0|0|0|0|0|0|0|0|0|0|0|0|0|0|1|0|0
988|Beautician and the Beast, The (1997)|07-Feb-1997||http://us.imdb.com/M/title-exact?Beautician%20and%20the%20Beast,%20The%20(1997)|0|0|0|0|0|1|0|0|0|0|0|0|0|0|1|0|0|0|0
989|Cats Don't Dance (1997)|26-Mar-1997||http://us.imdb.com/M/title-exact?Cats%20Don%27t%20Dance%20(1997)|0|0|0|1|1|0|0|0|0|0|0|0|1|0|0|0|0|0|0
990|Anna Karenina (1997)|04-Apr-1997||http://us.imdb.com/M/title-exact?Anna%20Karenina%20%281997%29|0|0|0|0|0|0|0|0|1|0|0|0|0|0|1|0|0|0|0
991|Keys to Tulsa (1997)|11-Apr-1997||http://us.imdb.com/Title?Keys+to+Tulsa+(1997)|0|0|0|0|0|0|1|0|0|0|0|0|0|0|0|0|0|0|0
992|Head Above Water (1996)|20-Jun-1997||http://us.imdb.com/M/title-exact?Head+Above+Water+(1996)|0|0|0|0|0|1|0|0|0|0|0|0|0|0|0|0|1|0|0
993|Hercules (1997)|27-Jun-1997||http://us.imdb.com/M/title-exact?Hercules+(1997)|0|0|1|1|1|1|0|0|0|0|0|0|1|0|0|0|0|0|0
994|Last Time I Committed Suicide, The (1997)|20-Jun-1997||http://us.imdb.com/M/title-exact?Last+Time+I+Committed+Suicide%2C+The+(1997)|0|0|0|0|0|0|0|0|1|0|0|0|0|0|0|0|0|0|0
995|Kiss Me, Guido (1997)|01-Jan-1997||http://us.imdb.com/M/title-exact?Kiss+Me%2C+Guido+(1997)|0|0|0|0|0|1|0|0|0|0|0|0|0|0|0|0|0|0|0
996|Big Green, The (1995)|01-Jan-1995||http://us.imdb.com/M/title-exact?Big%20Green,%20The%20(1995)|0|0|0|0|1|1|0|0|0|0|0|0|0|0|0|0|0|0|0
997|Stuart Saves His Family (1995)|01-Jan-1995||http://us.imdb.com/M/title-exact?Stuart%20Saves%20His%20Family%20(1995)|0|0|0|0|0|1|0|0|0|0|0|0|0|0|0|0|0|0|0
998|Cabin Boy (1994)|01-Jan-1994||http://us.imdb.com/M/title-exact?Cabin%20Boy%20(1994)|0|0|0|0|0|1|0|0|0|0|0|0|0|0|0|0|0|0|0
999|Clean Slate (1994)|01-Jan-1994||http://us.imdb.com/M/title-exact?Clean%20Slate%20(1994)|0|0|0|0|0|1|0|0|0|0|0|0|0|0|0|0|0|0|0
1000|Lightning Jack (1994)|01-Jan-1994||http://us.imdb.com/M/title-exact?Lightning%20Jack%20(1994)|0|0|0|0|0|1|0|0|0|0|0|0|0|0|0|0|0|0|1
1001|Stupids, The (1996)|30-Aug-1996||http://us.imdb.com/M/title-exact?Stupids,%20The%20(1996)|0|0|0|0|0|1|0|0|0|0|0|0|0|0|0|0|0|0|0
1002|Pest, The (1997)|07-Feb-1997||http://us.imdb.com/M/title-exact?Pest,%20The%20(1997)|0|0|0|0|0|1|0|0|0|0|0|0|0|0|0|0|0|0|0
1003|That Darn Cat! (1997)|14-Feb-1997||http://us.imdb.com/M/title-exact?That%20Darn%20Cat%20(1997)|0|0|0|0|1|1|0|0|0|0|0|0|0|1|0|0|0|0|0
1004|Geronimo: An American Legend (1993)|01-Jan-1993||http://us.imdb.com/M/title-exact?Geronimo:%20An%20American%20Legend%20(1993)|0|0|0|0|0|0|0|0|1|0|0|0|0|0|0|0|0|0|1
1005|Double vie de V�ronique, La (Double Life of Veronique, The) (1991)|01-Jan-1991||http://us.imdb.com/M/title-exact?Podwojne%20zycie%20Weroniki%20(1991)|0|0|0|0|0|0|0|0|1|0|0|0|0|0|0|0|0|0|0
1006|Until the End of the World (Bis ans Ende der Welt) (1991)|01-Jan-1991||http://us.imdb.com/M/title-exact?Bis%20ans%20Ende%20der%20Welt%20(1991)|0|0|0|0|0|0|0|0|1|0|0|0|0|0|0|1|0|0|0
1007|Waiting for Guffman (1996)|31-Jan-1997||http://us.imdb.com/M/title-exact?Waiting%20for%20Guffman%20(1996)|0|0|0|0|0|1|0|0|0|0|0|0|0|0|0|0|0|0|0
1008|I Shot Andy Warhol (1996)|01-May-1996||http://us.imdb.com/M/title-exact?I%20Shot%20Andy%20Warhol%20(1996)|0|0|0|0|0|0|0|0|1|0|0|0|0|0|0|0|0|0|0
1009|Stealing Beauty (1996)|14-Jun-1996||http://us.imdb.com/M/title-exact?Stealing%20Beauty%20(1996)|0|0|0|0|0|0|0|0|1|0|0|0|0|0|0|0|0|0|0
1010|Basquiat (1996)|16-Aug-1996||http://us.imdb.com/M/title-exact?Basquiat%20(1996)|0|0|0|0|0|0|0|0|1|0|0|0|0|0|0|0|0|0|0
1011|2 Days in the Valley (1996)|27-Sep-1996||http://us.imdb.com/M/title-exact?2%20Days%20in%20the%20Valley%20(1996)|0|0|0|0|0|0|1|0|0|0|0|0|0|0|0|0|0|0|0
1012|Private Parts (1997)|07-Mar-1997||http://us.imdb.com/M/title-exact?Private%20Parts%20(1997)|0|0|0|0|0|1|0|0|1|0|0|0|0|0|0|0|0|0|0
1013|Anaconda (1997)|11-Apr-1997||http://us.imdb.com/M/title-exact?Anaconda%20%281997%29|0|1|1|0|0|0|0|0|0|0|0|0|0|0|0|0|1|0|0
1014|Romy and Michele's High School Reunion (1997)|25-Apr-1997||http://us.imdb.com/M/title-exact?Romy%20and%20Michele%27s%20High%20School%20Reunion%20%281997%29|0|0|0|0|0|1|0|0|0|0|0|0|0|0|0|0|0|0|0
1015|Shiloh (1997)|23-May-1997||http://us.imdb.com/M/title-exact?Shiloh%20%281997%29|0|0|0|0|1|0|0|0|1|0|0|0|0|0|0|0|0|0|0
1016|Con Air (1997)|06-Jun-1997||http://us.imdb.com/M/title-exact?Con%20Air%20%281997%29|0|1|1|0|0|0|0|0|0|0|0|0|0|0|0|0|1|0|0
1017|Trees Lounge (1996)|11-Oct-1996||http://us.imdb.com/M/title-exact?Trees%20Lounge%20(1996)|0|0|0|0|0|0|0|0|1|0|0|0|0|0|0|0|0|0|0
1018|Tie Me Up! Tie Me Down! (1990)|01-Jan-1990||http://us.imdb.com/Title?%A1%C1tame%21+(1990)|0|0|0|0|0|0|0|0|1|0|0|0|0|0|0|0|0|0|0
1019|Die xue shuang xiong (Killer, The) (1989)|01-Jan-1989||http://us.imdb.com/M/title-exact?Die%20xue%20shuang%20xiong%20(1989)|0|1|0|0|0|0|0|0|0|0|0|0|0|0|0|0|1|0|0
1020|Gaslight (1944)|01-Jan-1944||http://us.imdb.com/M/title-exact?Gaslight%20(1944)|0|0|0|0|0|0|0|0|0|0|0|0|0|1|0|0|1|0|0
1021|8 1/2 (1963)|01-Jan-1963||http://us.imdb.com/M/title-exact?8%201/2%20(1963)|0|0|0|0|0|0|0|0|1|0|0|0|0|0|0|0|0|0|0
1022|Fast, Cheap & Out of Control (1997)|01-Jan-1997||http://us.imdb.com/M/title-exact?Fast,+Cheap+&+Out+of+Control+(1997)|0|0|0|0|0|0|0|1|0|0|0|0|0|0|0|0|0|0|0
1023|Fathers' Day (1997)|09-May-1997||http://us.imdb.com/M/title-exact?Fathers%27%20Day%20%281997%29|0|0|0|0|0|1|0|0|0|0|0|0|0|0|0|0|0|0|0
1024|Mrs. Dalloway (1997)|01-Jan-1997||http://us.imdb.com/M/title-exact?Mrs%2E+Dalloway+(1997)|0|0|0|0|0|0|0|0|0|0|0|0|0|0|1|0|0|0|0
1025|Fire Down Below (1997)|01-Jan-1997||http://us.imdb.com/M/title-exact?Fire+Down+Below+(1997)|0|1|0|0|0|0|0|0|1|0|0|0|0|0|0|0|1|0|0
1026|Lay of the Land, The (1997)|01-Jan-1997||http://us.imdb.com/M/title-exact?Lay+of+the+Land%2C+The+(1997)|0|0|0|0|0|1|0|0|1|0|0|0|0|0|0|0|0|0|0
1027|Shooter, The (1995)|01-Jan-1995||http://us.imdb.com/M/title-exact?Shooter,%20The%20(1995)|0|1|0|0|0|0|0|0|0|0|0|0|0|0|0|0|0|0|0
1028|Grumpier Old Men (1995)|01-Jan-1995||http://us.imdb.com/M/title-exact?Grumpier%20Old%20Men%20(1995)|0|0|0|0|0|1|0|0|0|0|0|0|0|0|1|0|0|0|0
1029|Jury Duty (1995)|01-Jan-1995||http://us.imdb.com/M/title-exact?Jury%20Duty%20(1995)|0|0|0|0|0|1|0|0|0|0|0|0|0|0|0|0|0|0|0
1030|Beverly Hillbillies, The (1993)|01-Jan-1993||http://us.imdb.com/M/title-exact?Beverly%20Hillbillies,%20The%20(1993)|0|0|0|0|0|1|0|0|0|0|0|0|0|0|0|0|0|0|0
1031|Lassie (1994)|01-Jan-1994||http://us.imdb.com/M/title-exact?Lassie%20(1994)|0|0|1|0|1|0|0|0|0|0|0|0|0|0|0|0|0|0|0
1032|Little Big League (1994)|01-Jan-1994||http://us.imdb.com/M/title-exact?Little%20Big%20League%20(1994)|0|0|0|0|1|1|0|0|0|0|0|0|0|0|0|0|0|0|0
1033|Homeward Bound II: Lost in San Francisco (1996)|08-Mar-1996||http://us.imdb.com/M/title-exact?Homeward%20Bound%20II:%20Lost%20in%20San%20Francisco%20(1996)|0|0|1|0|1|0|0|0|0|0|0|0|0|0|0|0|0|0|0
1034|Quest, The (1996)|26-Apr-1996||http://us.imdb.com/M/title-exact?Quest,%20The%20(1996/I)|0|1|1|0|0|0|0|0|0|0|0|0|0|0|0|0|0|0|0
1035|Cool Runnings (1993)|01-Jan-1993||http://us.imdb.com/M/title-exact?Cool%20Runnings%20(1993)|0|0|0|0|0|1|0|0|0|0|0|0|0|0|0|0|0|0|0
1036|Drop Dead Fred (1991)|01-Jan-1991||http://us.imdb.com/M/title-exact?Drop%20Dead%20Fred%20(1991)|0|0|0|0|0|1|0|0|0|1|0|0|0|0|0|0|0|0|0
1037|Grease 2 (1982)|01-Jan-1982||http://us.imdb.com/M/title-exact?Grease%202%20(1982)|0|0|0|0|0|1|0|0|0|0|0|0|1|0|1|0|0|0|0
1038|Switchback (1997)|01-Jan-1997||http://us.imdb.com/M/title-exact?Switchback+(1997)|0|0|0|0|0|0|0|0|0|0|0|0|0|0|0|0|1|0|0
1039|Hamlet (1996)|24-Jan-1997||http://us.imdb.com/M/title-exact?Hamlet%20(1996)|0|0|0|0|0|0|0|0|1|0|0|0|0|0|0|0|0|0|0
1040|Two if by Sea (1996)|01-Jan-1996||http://us.imdb.com/M/title-exact?Two%20if%20by%20Sea%20(1996)|0|0|0|0|0|1|0|0|0|0|0|0|0|0|1|0|0|0|0
1041|Forget Paris (1995)|01-Jan-1995||http://us.imdb.com/M/title-exact?Forget%20Paris%20(1995)|0|0|0|0|0|1|0|0|0|0|0|0|0|0|1|0|0|0|0
1042|Just Cause (1995)|01-Jan-1995||http://us.imdb.com/M/title-exact?Just%20Cause%20(1995)|0|0|0|0|0|0|0|0|0|0|0|0|0|1|0|0|1|0|0
1043|Rent-a-Kid (1995)|01-Jan-1995||http://us.imdb.com/M/title-exact?Rent-a-Kid%20(1995)|0|0|0|0|0|1|0|0|0|0|0|0|0|0|0|0|0|0|0
1044|Paper, The (1994)|01-Jan-1994||http://us.imdb.com/M/title-exact?Paper,%20The%20(1994)|0|0|0|0|0|1|0|0|1|0|0|0|0|0|0|0|0|0|0
1045|Fearless (1993)|01-Jan-1993||http://us.imdb.com/M/title-exact?Fearless%20(1993)|0|0|0|0|0|0|0|0|1|0|0|0|0|0|0|0|0|0|0
1046|Malice (1993)|01-Jan-1993||http://us.imdb.com/M/title-exact?Malice%20(1993)|0|0|0|0|0|0|0|0|0|0|0|0|0|0|0|0|1|0|0
1047|Multiplicity (1996)|12-Jul-1996||http://us.imdb.com/M/title-exact?Multiplicity%20(1996)|0|0|0|0|0|1|0|0|0|0|0|0|0|0|0|0|0|0|0
1048|She's the One (1996)|23-Aug-1996||http://us.imdb.com/M/title-exact?She's%20the%20One%20(1996)|0|0|0|0|0|1|0|0|0|0|0|0|0|0|1|0|0|0|0
1049|House Arrest (1996)|02-Aug-1996||http://us.imdb.com/Title?House+Arrest+(1996/I)|0|0|0|0|0|1|0|0|0|0|0|0|0|0|0|0|0|0|0
1050|Ghost and Mrs. Muir, The (1947)|01-Jan-1947||http://us.imdb.com/M/title-exact?Ghost%20and%20Mrs.%20Muir,%20The%20(1947)|0|0|0|0|0|0|0|0|1|0|0|0|0|0|1|0|0|0|0
1051|Associate, The (1996)|19-Oct-1996||http://us.imdb.com/M/title-exact?Associate,%20The%20(1996)|0|0|0|0|0|1|0|0|0|0|0|0|0|0|0|0|0|0|0
1052|Dracula: Dead and Loving It (1995)|01-Jan-1995||http://us.imdb.com/M/title-exact?Dracula:%20Dead%20and%20Loving%20It%20(1995)|0|0|0|0|0|1|0|0|0|0|0|1|0|0|0|0|0|0|0
1053|Now and Then (1995)|01-Jan-1995||http://us.imdb.com/M/title-exact?Now%20and%20Then%20(1995)|0|0|0|0|0|0|0|0|1|0|0|0|0|0|0|0|0|0|0
1054|Mr. Wrong (1996)|16-Feb-1996||http://us.imdb.com/M/title-exact?Mr.%20Wrong%20(1996)|0|0|0|0|0|1|0|0|0|0|0|0|0|0|0|0|0|0|0
1055|Simple Twist of Fate, A (1994)|01-Jan-1994||http://us.imdb.com/M/title-exact?Simple%20Twist%20of%20Fate,%20A%20(1994)|0|0|0|0|0|0|0|0|1|0|0|0|0|0|0|0|0|0|0
1056|Cronos (1992)|01-Jan-1992||http://us.imdb.com/M/title-exact?Cronos%20(1992)|0|0|0|0|0|0|0|0|0|0|0|1|0|0|0|0|0|0|0
1057|Pallbearer, The (1996)|19-Apr-1996||http://us.imdb.com/M/title-exact?Pallbearer,%20The%20(1996)|0|0|0|0|0|1|0|0|0|0|0|0|0|0|0|0|0|0|0
1058|War, The (1994)|01-Jan-1994||http://us.imdb.com/M/title-exact?War,%20The%20(1994)|0|0|1|0|0|0|0|0|1|0|0|0|0|0|0|0|0|0|0
1059|Don't Be a Menace to South Central While Drinking Your Juice in the Hood (1996)|01-Jan-1996||http://us.imdb.com/M/title-exact?Don't%20Be%20a%20Menace%20(1996)|0|0|0|0|0|1|0|0|0|0|0|0|0|0|0|0|0|0|0
1060|Adventures of Pinocchio, The (1996)|26-Jul-1996||http://us.imdb.com/M/title-exact?Adventures%20of%20Pinocchio,%20The%20(1996)|0|0|1|0|1|0|0|0|0|0|0|0|0|0|0|0|0|0|0
1061|Evening Star, The (1996)|25-Dec-1996||http://us.imdb.com/M/title-exact?Evening%20Star,%20The%20(1996)|0|0|0|0|0|1|0|0|1|0|0|0|0|0|0|0|0|0|0
1062|Four Days in September (1997)|23-Jan-1998||http://us.imdb.com/M/title-exact?imdb-title-119815|0|0|0|0|0|0|0|0|1|0|0|0|0|0|0|0|0|0|0
1063|Little Princess, A (1995)|01-Jan-1995||http://us.imdb.com/M/title-exact?Little%20Princess,%20A%20(1995)|0|0|0|0|1|0|0|0|1|0|0|0|0|0|0|0|0|0|0
1064|Crossfire (1947)|01-Jan-1947||http://us.imdb.com/M/title-exact?Crossfire%20(1947)|0|0|0|0|0|0|1|0|0|0|1|0|0|0|0|0|0|0|0
1065|Koyaanisqatsi (1983)|01-Jan-1983||http://us.imdb.com/M/title-exact?Koyaanisqatsi%20(1983)|0|0|0|0|0|0|0|1|0|0|0|0|0|0|0|0|0|1|0
1066|Balto (1995)|01-Jan-1995||http://us.imdb.com/M/title-exact?Balto%20(1995)|0|0|0|1|1|0|0|0|0|0|0|0|0|0|0|0|0|0|0
1067|Bottle Rocket (1996)|21-Feb-1996||http://us.imdb.com/M/title-exact?Bottle%20Rocket%20(1996)|0|0|0|0|0|1|0|0|0|0|0|0|0|0|0|0|0|0|0
1068|Star Maker, The (Uomo delle stelle, L') (1995)|01-Mar-1996||http://us.imdb.com/M/title-exact?Uomo%20delle%20stelle,%20L'%20(1995)|0|0|0|0|0|0|0|0|1|0|0|0|0|0|0|0|0|0|0
1069|Amateur (1994)|01-Jan-1994||http://us.imdb.com/M/title-exact?Amateur%20(1994)|0|0|0|0|0|0|1|0|1|0|0|0|0|0|0|0|1|0|0
1070|Living in Oblivion (1995)|01-Jan-1995||http://us.imdb.com/M/title-exact?Living%20in%20Oblivion%20(1995)|0|0|0|0|0|1|0|0|0|0|0|0|0|0|0|0|0|0|0
1071|Party Girl (1995)|01-Jan-1995||http://us.imdb.com/Title?Party+Girl+(1995/I)|0|0|0|0|0|1|0|0|0|0|0|0|0|0|0|0|0|0|0
1072|Pyromaniac's Love Story, A (1995)|01-Jan-1995||http://us.imdb.com/M/title-exact?Pyromaniac's%20Love%20Story,%20A%20(1995)|0|0|0|0|0|1|0|0|0|0|0|0|0|0|1|0|0|0|0
1073|Shallow Grave (1994)|01-Jan-1994||http://us.imdb.com/Title?Shallow+Grave+(1994)|0|0|0|0|0|0|0|0|0|0|0|0|0|0|0|0|1|0|0
1074|Reality Bites (1994)|01-Jan-1994||http://us.imdb.com/M/title-exact?Reality%20Bites%20(1994)|0|0|0|0|0|1|0|0|1|0|0|0|0|0|0|0|0|0|0
1075|Man of No Importance, A (1994)|01-Jan-1994||http://us.imdb.com/M/title-exact?Man%20of%20No%20Importance,%20A%20(1994)|0|0|0|0|0|0|0|0|1|0|0|0|0|0|0|0|0|0|0
1076|Pagemaster, The (1994)|01-Jan-1994||http://us.imdb.com/M/title-exact?Pagemaster,%20The%20(1994)|0|1|1|1|1|0|0|0|0|1|0|0|0|0|0|0|0|0|0
1077|Love and a .45 (1994)|01-Jan-1994||http://us.imdb.com/M/title-exact?Love%20and%20a%20.45%20(1994)|0|0|0|0|0|0|0|0|0|0|0|0|0|0|0|0|1|0|0
1078|Oliver & Company (1988)|29-Mar-1988||http://us.imdb.com/M/title-exact?Oliver%20&%20Company%20(1988)|0|0|0|1|1|0|0|0|0|0|0|0|0|0|0|0|0|0|0
1079|Joe's Apartment (1996)|26-Jul-1996||http://us.imdb.com/M/title-exact?Joe's%20Apartment%20(1996)|0|0|0|0|0|1|0|0|0|0|0|0|1|0|0|0|0|0|0
1080|Celestial Clockwork (1994)|12-Jul-1996||http://us.imdb.com/Title?Cort%E1zar+(1994)|0|0|0|0|0|1|0|0|0|0|0|0|0|0|0|0|0|0|0
1081|Curdled (1996)|27-Sep-1996||http://us.imdb.com/M/title-exact?Curdled%20(1996)|0|0|0|0|0|0|1|0|0|0|0|0|0|0|0|0|0|0|0
1082|Female Perversions (1996)|25-Apr-1997||http://us.imdb.com/M/title-exact?Female%20Perversions%20(1996)|0|0|0|0|0|0|0|0|1|0|0|0|0|0|0|0|0|0|0
1083|Albino Alligator (1996)|17-Jan-1997||http://us.imdb.com/M/title-exact?Albino%20Alligator%20(1996)|0|0|0|0|0|0|1|0|0|0|0|0|0|0|0|0|1|0|0
1084|Anne Frank Remembered (1995)|23-Feb-1996||http://us.imdb.com/M/title-exact?Anne%20Frank%20Remembered%20(1995)|0|0|0|0|0|0|0|1|0|0|0|0|0|0|0|0|0|0|0
1085|Carried Away (1996)|29-Mar-1996||http://us.imdb.com/M/title-exact?Carried%20Away%20(1996)|0|0|0|0|0|0|0|0|1|0|0|0|0|0|1|0|0|0|0
1086|It's My Party (1995)|22-Mar-1996||http://us.imdb.com/M/title-exact?It's%20My%20Party%20(1995)|0|0|0|0|0|0|0|0|1|0|0|0|0|0|0|0|0|0|0
1087|Bloodsport 2 (1995)|01-Mar-1996||http://us.imdb.com/M/title-exact?Bloodsport%202%20%281995%29|0|1|0|0|0|0|0|0|0|0|0|0|0|0|0|0|0|0|0
1088|Double Team (1997)|04-Apr-1997||http://us.imdb.com/M/title-exact?Double%20Team%20%281997%29|0|1|0|0|0|0|0|0|0|0|0|0|0|0|0|0|0|0|0
1089|Speed 2: Cruise Control (1997)|13-Jun-1997||http://us.imdb.com/M/title-exact?Speed%202%3A%20Cruise%20Control%20%281997%29|0|1|0|0|0|0|0|0|0|0|0|0|0|0|1|0|1|0|0
1090|Sliver (1993)|01-Jan-1993||http://us.imdb.com/M/title-exact?Sliver%20(1993)|0|0|0|0|0|0|0|0|0|0|0|0|0|0|0|0|1|0|0
1091|Pete's Dragon (1977)|01-Jan-1977||http://us.imdb.com/M/title-exact?Pete's%20Dragon%20(1977)|0|0|1|1|1|0|0|0|0|0|0|0|1|0|0|0|0|0|0
1092|Dear God (1996)|01-Nov-1996||http://us.imdb.com/M/title-exact?Dear%20God%20(1996)|0|0|0|0|0|1|0|0|0|0|0|0|0|0|0|0|0|0|0
1093|Live Nude Girls (1995)|01-Mar-1996||http://us.imdb.com/M/title-exact?Live%20Nude%20Girls%20(1995)|0|0|0|0|0|1|0|0|0|0|0|0|0|0|0|0|0|0|0
1094|Thin Line Between Love and Hate, A (1996)|03-Apr-1996||http://us.imdb.com/M/title-exact?Thin%20Line%20Between%20Love%20and%20Hate,%20A%20(1996)|0|0|0|0|0|1|0|0|0|0|0|0|0|0|0|0|0|0|0
1095|High School High (1996)|25-Oct-1996||http://us.imdb.com/M/title-exact?High%20School%20High%20(1996)|0|0|0|0|0|1|0|0|0|0|0|0|0|0|0|0|0|0|0
1096|Commandments (1997)|02-May-1997||http://us.imdb.com/Title?Commandments+(1997)|0|0|0|0|0|0|0|0|0|0|0|0|0|0|1|0|0|0|0
1097|Hate (Haine, La) (1995)|09-Feb-1996||http://us.imdb.com/M/title-exact?Haine,%20La%20(1995)|0|0|0|0|0|0|0|0|1|0|0|0|0|0|0|0|0|0|0
1098|Flirting With Disaster (1996)|22-Mar-1996||http://us.imdb.com/M/title-exact?Flirting%20With%20Disaster%20(1996)|0|0|0|0|0|1|0|0|0|0|0|0|0|0|0|0|0|0|0
1099|Red Firecracker, Green Firecracker (1994)|01-Jan-1994||http://us.imdb.com/M/title-exact?Pao%20Da%20Shuang%20Deng%20(1994)|0|0|0|0|0|0|0|0|1|0|0|0|0|0|0|0|0|0|0
1100|What Happened Was... (1994)|01-Jan-1994||http://us.imdb.com/M/title-exact?What%20Happened%20Was...%20(1994)|0|0|0|0|0|1|0|0|1|0|0|0|0|0|1|0|0|0|0
1101|Six Degrees of Separation (1993)|01-Jan-1993||http://us.imdb.com/M/title-exact?Six%20Degrees%20of%20Separation%20(1993)|0|0|0|0|0|0|0|0|1|0|0|0|0|1|0|0|0|0|0
1102|Two Much (1996)|01-Jan-1996||http://us.imdb.com/M/title-exact?Two%20Much%20(1996)|0|0|0|0|0|1|0|0|0|0|0|0|0|0|1|0|0|0|0
1103|Trust (1990)|01-Jan-1990||http://us.imdb.com/Title?Trust+(1990)|0|0|0|0|0|1|0|0|1|0|0|0|0|0|0|0|0|0|0
1104|C'est arriv� pr�s de chez vous (1992)|01-Jan-1992||http://us.imdb.com/M/title-exact?C%27est%20arriv%E9%20pr%E8s%20de%20chez%20vous%20%281992%29|0|0|0|0|0|1|1|0|1|0|0|0|0|0|0|0|0|0|0
1105|Firestorm (1998)|09-Jan-1998||http://us.imdb.com/M/title-exact?imdb-title-120670|0|1|1|0|0|0|0|0|0|0|0|0|0|0|0|0|1|0|0
1106|Newton Boys, The (1998)|14-Mar-1998||http://us.imdb.com/Title?Newton+Boys,+The+(1998)|0|0|0|0|0|0|1|0|1|0|0|0|0|0|0|0|0|0|0
1107|Beyond Rangoon (1995)|01-Jan-1995||http://us.imdb.com/M/title-exact?Beyond%20Rangoon%20(1995)|0|0|0|0|0|0|0|0|1|0|0|0|0|0|0|0|0|0|0
1108|Feast of July (1995)|01-Jan-1995||http://us.imdb.com/M/title-exact?Feast%20of%20July%20(1995)|0|0|0|0|0|0|0|0|1|0|0|0|0|0|0|0|0|0|0
1109|Death and the Maiden (1994)|01-Jan-1994||http://us.imdb.com/M/title-exact?Death%20and%20the%20Maiden%20(1994)|0|0|0|0|0|0|0|0|1|0|0|0|0|0|0|0|1|0|0
1110|Tank Girl (1995)|01-Jan-1995||http://us.imdb.com/M/title-exact?Tank%20Girl%20(1995)|0|1|0|0|0|1|0|0|0|0|0|0|1|0|0|1|0|0|0
1111|Double Happiness (1994)|01-Mar-1996||http://us.imdb.com/M/title-exact?Double%20Happiness%20(1994)|0|0|0|0|0|0|0|0|1|0|0|0|0|0|0|0|0|0|0
1112|Cobb (1994)|01-Jan-1994||http://us.imdb.com/M/title-exact?Cobb%20(1994)|0|0|0|0|0|0|0|0|1|0|0|0|0|0|0|0|0|0|0
1113|Mrs. Parker and the Vicious Circle (1994)|01-Jan-1994||http://us.imdb.com/M/title-exact?Mrs.%20Parker%20and%20the%20Vicious%20Circle%20(1994)|0|0|0|0|0|0|0|0|1|0|0|0|0|0|0|0|0|0|0
1114|Faithful (1996)|03-Apr-1996||http://us.imdb.com/M/title-exact?Faithful%20(1996)|0|0|0|0|0|1|0|0|0|0|0|0|0|0|0|0|0|0|0
1115|Twelfth Night (1996)|25-Oct-1996||http://us.imdb.com/M/title-exact?Twelfth%20Night:%20Or%20What%20You%20Will%20(1996)|0|0|0|0|0|1|0|0|1|0|0|0|0|0|1|0|0|0|0
1116|Mark of Zorro, The (1940)|01-Jan-1940||http://us.imdb.com/M/title-exact?Mark%20of%20Zorro,%20The%20(1940)|0|0|1|0|0|0|0|0|0|0|0|0|0|0|0|0|0|0|0
1117|Surviving Picasso (1996)|20-Sep-1996||http://us.imdb.com/M/title-exact?Surviving%20Picasso%20(1996)|0|0|0|0|0|0|0|0|1|0|0|0|0|0|0|0|0|0|0
1118|Up in Smoke (1978)|01-Jan-1978||http://us.imdb.com/M/title-exact?Up%20in%20Smoke%20(1978)|0|0|0|0|0|1|0|0|0|0|0|0|0|0|0|0|0|0|0
1119|Some Kind of Wonderful (1987)|01-Jan-1987||http://us.imdb.com/M/title-exact?Some%20Kind%20of%20Wonderful%20(1987)|0|0|0|0|0|0|0|0|1|0|0|0|0|0|1|0|0|0|0
1120|I'm Not Rappaport (1996)|13-Nov-1996||http://us.imdb.com/M/title-exact?I'm%20Not%20Rappaport%20(1996)|0|0|0|0|0|1|0|0|0|0|0|0|0|0|0|0|0|0|0
1121|Umbrellas of Cherbourg, The (Parapluies de Cherbourg, Les) (1964)|05-Apr-1996||http://us.imdb.com/M/title-exact?Parapluies%20de%20Cherbourg,%20Les%20(1964)|0|0|0|0|0|0|0|0|1|0|0|0|1|0|0|0|0|0|0
1122|They Made Me a Criminal (1939)|01-Jan-1939||http://us.imdb.com/M/title-exact?They%20Made%20Me%20a%20Criminal%20(1939)|0|0|0|0|0|0|1|0|1|0|0|0|0|0|0|0|0|0|0
1123|Last Time I Saw Paris, The (1954)|01-Jan-1954||http://us.imdb.com/M/title-exact?Last%20Time%20I%20Saw%20Paris,%20The%20(1954)|0|0|0|0|0|0|0|0|1|0|0|0|0|0|0|0|0|0|0
1124|Farewell to Arms, A (1932)|01-Jan-1932||http://us.imdb.com/M/title-exact?Farewell%20to%20Arms,%20A%20(1932)|0|0|0|0|0|0|0|0|0|0|0|0|0|0|1|0|0|1|0
1125|Innocents, The (1961)|01-Jan-1961||http://us.imdb.com/M/title-exact?Innocents,%20The%20(1961)|0|0|0|0|0|0|0|0|0|0|0|0|0|0|0|0|1|0|0
1126|Old Man and the Sea, The (1958)|01-Jan-1958||http://us.imdb.com/M/title-exact?Old%20Man%20and%20the%20Sea,%20The%20(1958)|0|0|1|0|0|0|0|0|1|0|0|0|0|0|0|0|0|0|0
1127|Truman Show, The (1998)|01-Jan-1998||http://us.imdb.com/Title?Truman+Show,+The+(1998)|0|0|0|0|0|0|0|0|1|0|0|0|0|0|0|0|0|0|0
1128|Heidi Fleiss: Hollywood Madam (1995) |09-Feb-1996||http://us.imdb.com/M/title-exact?Heidi%20Fleiss:%20Hollywood%20Madam%20(1995)%20(TV)|0|0|0|0|0|0|0|1|0|0|0|0|0|0|0|0|0|0|0
1129|Chungking Express (1994)|16-Feb-1996||http://us.imdb.com/M/title-exact?Chongqing%20Senlin%20(1994)|0|0|0|0|0|0|0|0|1|0|0|0|0|1|1|0|0|0|0
1130|Jupiter's Wife (1994)|09-Feb-1996||http://us.imdb.com/M/title-exact?Jupiter's%20Wife%20(1994)|0|0|0|0|0|0|0|1|0|0|0|0|0|0|0|0|0|0|0
1131|Safe (1995)|01-Jan-1995||http://us.imdb.com/M/title-exact?Safe%20(1995)|0|0|0|0|0|0|0|0|0|0|0|0|0|0|0|0|1|0|0
1132|Feeling Minnesota (1996)|13-Sep-1996||http://us.imdb.com/M/title-exact?Feeling%20Minnesota%20(1996)|0|0|0|0|0|0|0|0|1|0|0|0|0|0|1|0|0|0|0
1133|Escape to Witch Mountain (1975)|01-Jan-1975||http://us.imdb.com/M/title-exact?Escape%20to%20Witch%20Mountain%20(1975)|0|0|1|0|1|0|0|0|0|1|0|0|0|0|0|0|0|0|0
1134|Get on the Bus (1996)|16-Oct-1996||http://us.imdb.com/M/title-exact?Get%20on%20the%20Bus%20(1996)|0|0|0|0|0|0|0|0|1|0|0|0|0|0|0|0|0|0|0
1135|Doors, The (1991)|01-Jan-1991||http://us.imdb.com/M/title-exact?Doors,%20The%20(1991)|0|0|0|0|0|0|0|0|1|0|0|0|1|0|0|0|0|0|0
1136|Ghosts of Mississippi (1996)|20-Dec-1996||http://us.imdb.com/M/title-exact?Ghosts%20of%20Mississippi%20(1996)|0|0|0|0|0|0|0|0|1|0|0|0|0|0|0|0|0|0|0
1137|Beautiful Thing (1996)|09-Oct-1996||http://us.imdb.com/M/title-exact?Beautiful%20Thing%20(1996)|0|0|0|0|0|0|0|0|1|0|0|0|0|0|1|0|0|0|0
1138|Best Men (1997)|01-Sep-1997||http://us.imdb.com/M/title-exact/Independence%20(1997)|0|1|0|0|0|1|1|0|1|0|0|0|0|0|0|0|0|0|0
1139|Hackers (1995)|01-Jan-1995||http://us.imdb.com/M/title-exact?Hackers%20(1995)|0|1|0|0|0|0|1|0|0|0|0|0|0|0|0|0|1|0|0
1140|Road to Wellville, The (1994)|01-Jan-1994||http://us.imdb.com/M/title-exact?Road%20to%20Wellville,%20The%20(1994)|0|0|0|0|0|1|0|0|0|0|0|0|0|0|0|0|0|0|0
1141|War Room, The (1993)|01-Jan-1993||http://us.imdb.com/M/title-exact?War%20Room,%20The%20(1993)|0|0|0|0|0|0|0|1|0|0|0|0|0|0|0|0|0|0|0
1142|When We Were Kings (1996)|14-Feb-1997||http://us.imdb.com/M/title-exact?When%20We%20Were%20Kings%20(1996)|0|0|0|0|0|0|0|1|0|0|0|0|0|0|0|0|0|0|0
1143|Hard Eight (1996)|28-Feb-1997||http://us.imdb.com/Title?Hard+Eight+(1996)|0|0|0|0|0|0|1|0|0|0|0|0|0|0|0|0|1|0|0
1144|Quiet Room, The (1996)|02-May-1997||http://us.imdb.com/M/title-exact?Quiet%20Room%2C%20The%20(1996)|0|0|0|0|0|0|0|0|1|0|0|0|0|0|0|0|0|0|0
1145|Blue Chips (1994)|01-Jan-1994||http://us.imdb.com/M/title-exact?Blue%20Chips%20(1994)|0|0|0|0|0|0|0|0|1|0|0|0|0|0|0|0|0|0|0
1146|Calendar Girl (1993)|01-Jan-1993||http://us.imdb.com/M/title-exact?Calendar%20Girl%20(1993)|0|0|0|0|0|0|0|0|1|0|0|0|0|0|0|0|0|0|0
1147|My Family (1995)|01-Jan-1995||http://us.imdb.com/M/title-exact?My%20Family%20(1995)|0|0|0|0|0|0|0|0|1|0|0|0|0|0|0|0|0|0|0
1148|Tom & Viv (1994)|01-Jan-1994||http://us.imdb.com/M/title-exact?Tom%20&%20Viv%20(1994)|0|0|0|0|0|0|0|0|1|0|0|0|0|0|0|0|0|0|0
1149|Walkabout (1971)|20-Dec-1971||http://us.imdb.com/M/title-exact?Walkabout%20(1971)|0|0|0|0|0|0|0|0|1|0|0|0|0|0|0|0|0|0|0
1150|Last Dance (1996)|03-May-1996||http://us.imdb.com/M/title-exact?Last%20Dance%20(1996)|0|0|0|0|0|0|0|0|1|0|0|0|0|0|0|0|0|0|0
1151|Original Gangstas (1996)|10-May-1996||http://us.imdb.com/M/title-exact?Original%20Gangstas%20(1996)|0|0|0|0|0|0|1|0|0|0|0|0|0|0|0|0|0|0|0
1152|In Love and War (1996)|24-Jan-1997||http://us.imdb.com/M/title-exact?In%20Love%20and%20War%20(1996)|0|0|0|0|0|0|0|0|0|0|0|0|0|0|1|0|0|1|0
1153|Backbeat (1993)|01-Jan-1993||http://us.imdb.com/M/title-exact?Backbeat%20(1993)|0|0|0|0|0|0|0|0|1|0|0|0|1|0|0|0|0|0|0
1154|Alphaville (1965)|01-Jan-1965||http://us.imdb.com/M/title-exact?Alphaville%20(1965)|0|0|0|0|0|0|0|0|0|0|0|0|0|0|0|1|0|0|0
1155|Rendezvous in Paris (Rendez-vous de Paris, Les) (1995)|28-Jun-1996||http://us.imdb.com/M/title-exact?Rendez-vous%20de%20Paris,%20Les%20(1995)|0|0|0|0|0|1|0|0|0|0|0|0|0|0|1|0|0|0|0
1156|Cyclo (1995)|02-Aug-1996||http://us.imdb.com/M/title-exact?Cyclo%20(1995)|0|0|0|0|0|0|1|0|1|0|0|0|0|0|0|0|0|0|0
1157|Relic, The (1997)|17-Jan-1997||http://us.imdb.com/M/title-exact?Relic,%20The%20(1997)|0|0|0|0|0|0|0|0|0|0|0|1|0|0|0|0|0|0|0
1158|Fille seule, La (A Single Girl) (1995)|30-Oct-1996||http://us.imdb.com/M/title-exact?Fille%20seule,%20La%20(1995)|0|0|0|0|0|0|0|0|1|0|0|0|0|0|0|0|0|0|0
1159|Stalker (1979)|01-Jan-1979||http://us.imdb.com/M/title-exact?Stalker%20(1979)|0|0|0|0|0|0|0|0|0|0|0|0|0|1|0|1|0|0|0
1160|Love! Valour! Compassion! (1997)|16-May-1997||http://us.imdb.com/Title?Love%21+Valour%21+Compassion%21+(1997)|0|0|0|0|0|0|0|0|1|0|0|0|0|0|1|0|0|0|0
1161|Palookaville (1996)|25-Oct-1996||http://us.imdb.com/M/title-exact?Palookaville%20(1996)|0|1|0|0|0|0|0|0|1|0|0|0|0|0|0|0|0|0|0
1162|Phat Beach (1996)|02-Aug-1996||http://us.imdb.com/M/title-exact?Phat%20Beach%20(1996)|0|0|0|0|0|1|0|0|0|0|0|0|0|0|0|0|0|0|0
1163|Portrait of a Lady, The (1996)|27-Dec-1996||http://us.imdb.com/M/title-exact?Portrait%20of%20a%20Lady%2C%20The%20%281996%29|0|0|0|0|0|0|0|0|1|0|0|0|0|0|0|0|0|0|0
1164|Zeus and Roxanne (1997)|10-Jan-1997||http://us.imdb.com/M/title-exact?Zeus%20and%20Roxanne%20(1997)|0|0|0|0|1|0|0|0|0|0|0|0|0|0|0|0|0|0|0
1165|Big Bully (1996)|01-Jan-1996||http://us.imdb.com/M/title-exact?Big%20Bully%20(1996)|0|0|0|0|0|1|0|0|1|0|0|0|0|0|0|0|0|0|0
1166|Love & Human Remains (1993)|01-Jan-1993||http://us.imdb.com/M/title-exact?Love%20&%20Human%20Remains%20(1993)|0|0|0|0|0|1|0|0|0|0|0|0|0|0|0|0|0|0|0
1167|Sum of Us, The (1994)|01-Jan-1994||http://us.imdb.com/M/title-exact?Sum%20of%20Us,%20The%20(1994)|0|0|0|0|0|1|0|0|0|0|0|0|0|0|0|0|0|0|0
1168|Little Buddha (1993)|01-Jan-1993||http://us.imdb.com/M/title-exact?Little%20Buddha%20(1993)|0|0|0|0|0|0|0|0|1|0|0|0|0|0|0|0|0|0|0
1169|Fresh (1994)|01-Jan-1994||http://us.imdb.com/M/title-exact?Fresh%20(1994)|0|0|0|0|0|0|0|0|1|0|0|0|0|0|0|0|0|0|0
1170|Spanking the Monkey (1994)|01-Jan-1994||http://us.imdb.com/M/title-exact?Spanking%20the%20Monkey%20(1994)|0|0|0|0|0|1|0|0|1|0|0|0|0|0|0|0|0|0|0
1171|Wild Reeds (1994)|01-Jan-1994||http://us.imdb.com/M/title-exact?Roseaux%20sauvages%2C%20Les%20%281994%29|0|0|0|0|0|0|0|0|1|0|0|0|0|0|0|0|0|0|0
1172|Women, The (1939)|01-Jan-1939||http://us.imdb.com/M/title-exact?Women,%20The%20(1939)|0|0|0|0|0|1|0|0|0|0|0|0|0|0|0|0|0|0|0
1173|Bliss (1997)|06-Jun-1997||http://us.imdb.com/M/title-exact?Bliss%20(1997)|0|0|0|0|0|0|0|0|1|0|0|0|0|0|1|0|0|0|0
1174|Caught (1996)|27-Sep-1996||http://us.imdb.com/M/title-exact?Caught%20(1996)|0|0|0|0|0|0|0|0|1|0|0|0|0|0|0|0|1|0|0
1175|Hugo Pool (1997)|01-Jan-1997||http://us.imdb.com/M/title-exact?Hugo+Pool+(1997)|0|0|0|0|0|0|0|0|0|0|0|0|0|0|1|0|0|0|0
1176|Welcome To Sarajevo (1997)|01-Jan-1997||http://us.imdb.com/M/title-exact?Welcome+To+Sarajevo+(1997)|0|0|0|0|0|0|0|0|1|0|0|0|0|0|0|0|0|1|0
1177|Dunston Checks In (1996)|01-Jan-1996||http://us.imdb.com/M/title-exact?Dunston%20Checks%20In%20(1996)|0|0|0|0|0|1|0|0|0|0|0|0|0|0|0|0|0|0|0
1178|Major Payne (1994)|01-Jan-1994||http://us.imdb.com/M/title-exact?Major%20Payne%20(1994)|0|0|0|0|0|1|0|0|0|0|0|0|0|0|0|0|0|0|0
1179|Man of the House (1995)|01-Jan-1995||http://us.imdb.com/M/title-exact?Man%20of%20the%20House%20(1995)|0|0|0|0|0|1|0|0|0|0|0|0|0|0|0|0|0|0|0
1180|I Love Trouble (1994)|01-Jan-1994||http://us.imdb.com/M/title-exact?I%20Love%20Trouble%20(1994)|0|1|0|0|0|1|0|0|0|0|0|0|0|0|0|0|0|0|0
1181|Low Down Dirty Shame, A (1994)|01-Jan-1994||http://us.imdb.com/M/title-exact?Low%20Down%20Dirty%20Shame,%20A%20(1994)|0|1|0|0|0|1|0|0|0|0|0|0|0|0|0|0|0|0|0
1182|Cops and Robbersons (1994)|01-Jan-1994||http://us.imdb.com/M/title-exact?Cops%20and%20Robbersons%20(1994)|0|0|0|0|0|1|0|0|0|0|0|0|0|0|0|0|0|0|0
1183|Cowboy Way, The (1994)|01-Jan-1994||http://us.imdb.com/M/title-exact?Cowboy%20Way,%20The%20(1994)|0|1|0|0|0|1|0|0|0|0|0|0|0|0|0|0|0|0|0
1184|Endless Summer 2, The (1994)|01-Jan-1994||http://us.imdb.com/M/title-exact?Endless%20Summer%202,%20The%20(1994)|0|0|0|0|0|0|0|1|0|0|0|0|0|0|0|0|0|0|0
1185|In the Army Now (1994)|01-Jan-1994||http://us.imdb.com/M/title-exact?In%20the%20Army%20Now%20(1994)|0|0|0|0|0|1|0|0|0|0|0|0|0|0|0|0|0|1|0
1186|Inkwell, The (1994)|01-Jan-1994||http://us.imdb.com/M/title-exact?Inkwell,%20The%20(1994)|0|0|0|0|0|1|0|0|1|0|0|0|0|0|0|0|0|0|0
1187|Switchblade Sisters (1975)|17-May-1975||http://us.imdb.com/M/title-exact?Switchblade%20Sisters%20(1975)|0|0|0|0|0|0|1|0|0|0|0|0|0|0|0|0|0|0|0
1188|Young Guns II (1990)|01-Jan-1990||http://us.imdb.com/M/title-exact?Young%20Guns%20II%20(1990)|0|1|0|0|0|1|0|0|0|0|0|0|0|0|0|0|0|0|1
1189|Prefontaine (1997)|24-Jan-1997||http://us.imdb.com/M/title-exact?Prefontaine%20(1997)|0|0|0|0|0|0|0|0|1|0|0|0|0|0|0|0|0|0|0
1190|That Old Feeling (1997)|04-Apr-1997||http://us.imdb.com/M/title-exact?That%20Old%20Feeling%20(1997)|0|0|0|0|0|1|0|0|0|0|0|0|0|0|1|0|0|0|0
1191|Letter From Death Row, A (1998)|01-Feb-1998||http://us.imdb.com/M/title-exact?Letter+From+Death+Row%2C+A+(1998)|0|0|0|0|0|0|1|0|1|0|0|0|0|0|0|0|0|0|0
1192|Boys of St. Vincent, The (1993)|01-Jan-1993||http://us.imdb.com/M/title-exact?Boys%20of%20St.%20Vincent,%20The%20(1993)|0|0|0|0|0|0|0|0|1|0|0|0|0|0|0|0|0|0|0
1193|Before the Rain (Pred dozhdot) (1994)|01-Jan-1994||http://us.imdb.com/M/title-exact?Pred%20dozhdot%20(1994)|0|0|0|0|0|0|0|0|1|0|0|0|0|0|0|0|0|0|0
1194|Once Were Warriors (1994)|01-Jan-1994||http://us.imdb.com/M/title-exact?Once%20Were%20Warriors%20(1994)|0|0|0|0|0|0|1|0|1|0|0|0|0|0|0|0|0|0|0
1195|Strawberry and Chocolate (Fresa y chocolate) (1993)|01-Jan-1993||http://us.imdb.com/M/title-exact?Fresa%20y%20chocolate%20(1993)|0|0|0|0|0|0|0|0|1|0|0|0|0|0|0|0|0|0|0
1196|Savage Nights (Nuits fauves, Les) (1992)|01-Jan-1992||http://us.imdb.com/M/title-exact?Nuits%20fauves,%20Les%20(1992)|0|0|0|0|0|0|0|0|1|0|0|0|0|0|0|0|0|0|0
1197|Family Thing, A (1996)|23-Mar-1996||http://us.imdb.com/M/title-exact?Family%20Thing,%20A%20(1996)|0|0|0|0|0|1|0|0|1|0|0|0|0|0|0|0|0|0|0
1198|Purple Noon (1960)|28-Jun-1960||http://us.imdb.com/M/title-exact?Plein%20soleil%20(1960)|0|0|0|0|0|0|1|0|0|0|0|0|0|0|0|0|1|0|0
1199|Cemetery Man (Dellamorte Dellamore) (1994)|12-Apr-1996||http://us.imdb.com/M/title-exact?Dellamorte%20Dellamore%20(1994)|0|0|0|0|0|1|0|0|0|0|0|1|0|0|0|0|0|0|0
1200|Kim (1950)|01-Jan-1950||http://us.imdb.com/M/title-exact?Kim%20(1950)|0|0|0|0|1|0|0|0|1|0|0|0|0|0|0|0|0|0|0
1201|Marlene Dietrich: Shadow and Light (1996) |02-Apr-1996||http://us.imdb.com/M/title-exact?Marlene%20Dietrich:%20Shadow%20and%20Light%20(1996)%20(TV)|0|0|0|0|0|0|0|1|0|0|0|0|0|0|0|0|0|0|0
1202|Maybe, Maybe Not (Bewegte Mann, Der) (1994)|19-Jul-1996||http://us.imdb.com/M/title-exact?Bewegte%20Mann,%20Der%20(1994)|0|0|0|0|0|1|0|0|0|0|0|0|0|0|0|0|0|0|0
1203|Top Hat (1935)|01-Jan-1935||http://us.imdb.com/M/title-exact?Top%20Hat%20(1935)|0|0|0|0|0|1|0|0|0|0|0|0|1|0|1|0|0|0|0
1204|To Be or Not to Be (1942)|01-Jan-1942||http://us.imdb.com/M/title-exact?To%20Be%20or%20Not%20to%20Be%20(1942)|0|0|0|0|0|1|0|0|1|0|0|0|0|0|0|0|0|1|0
1205|Secret Agent, The (1996)|08-Nov-1996||http://us.imdb.com/M/title-exact?Secret%20Agent,%20The%20(1996)|0|0|0|0|0|0|0|0|1|0|0|0|0|0|0|0|0|0|0
1206|Amos & Andrew (1993)|01-Jan-1993||http://us.imdb.com/M/title-exact?Amos%20&%20Andrew%20(1993)|0|0|0|0|0|1|0|0|0|0|0|0|0|0|0|0|0|0|0
1207|Jade (1995)|01-Jan-1995||http://us.imdb.com/M/title-exact?Jade%20(1995)|0|0|0|0|0|0|0|0|0|0|0|0|0|0|0|0|1|0|0
1208|Kiss of Death (1995)|01-Jan-1995||http://us.imdb.com/M/title-exact?Kiss%20of%20Death%20(1995)|0|0|0|0|0|0|1|0|1|0|0|0|0|0|0|0|1|0|0
1209|Mixed Nuts (1994)|01-Jan-1994||http://us.imdb.com/M/title-exact?Mixed%20Nuts%20(1994)|0|0|0|0|0|1|0|0|0|0|0|0|0|0|0|0|0|0|0
1210|Virtuosity (1995)|01-Jan-1995||http://us.imdb.com/M/title-exact?Virtuosity%20(1995)|0|0|0|0|0|0|0|0|0|0|0|0|0|0|0|1|1|0|0
1211|Blue Sky (1994)|01-Jan-1994||http://us.imdb.com/M/title-exact?Blue%20Sky%20(1994)|0|0|0|0|0|0|0|0|1|0|0|0|0|0|1|0|0|0|0
1212|Flesh and Bone (1993)|01-Jan-1993||http://us.imdb.com/M/title-exact?Flesh%20and%20Bone%20(1993)|0|0|0|0|0|0|0|0|1|0|0|0|0|1|1|0|0|0|0
1213|Guilty as Sin (1993)|01-Jan-1993||http://us.imdb.com/M/title-exact?Guilty%20as%20Sin%20(1993)|0|0|0|0|0|0|1|0|1|0|0|0|0|0|0|0|1|0|0
1214|In the Realm of the Senses (Ai no corrida) (1976)|08-Mar-1976||http://us.imdb.com/M/title-exact?Ai%20no%20Corrida%20(1976)|0|0|0|0|0|0|0|0|1|0|0|0|0|0|0|0|0|0|0
1215|Barb Wire (1996)|03-May-1996||http://us.imdb.com/M/title-exact?Barb%20Wire%20(1996)|0|1|0|0|0|0|0|0|0|0|0|0|0|0|0|1|0|0|0
1216|Kissed (1996)|18-Apr-1997||http://us.imdb.com/M/title-exact?Kissed%20%281996%29|0|0|0|0|0|0|0|0|0|0|0|0|0|0|1|0|0|0|0
1217|Assassins (1995)|01-Jan-1995||http://us.imdb.com/Title?Assassins+(1995)|0|0|0|0|0|0|0|0|0|0|0|0|0|0|0|0|1|0|0
1218|Friday (1995)|01-Jan-1995||http://us.imdb.com/M/title-exact?Friday%20(1995)|0|0|0|0|0|1|0|0|0|0|0|0|0|0|0|0|0|0|0
1219|Goofy Movie, A (1995)|01-Jan-1995||http://us.imdb.com/M/title-exact?Goofy%20Movie,%20A%20(1995)|0|0|0|1|1|1|0|0|0|0|0|0|0|0|1|0|0|0|0
1220|Higher Learning (1995)|01-Jan-1995||http://us.imdb.com/M/title-exact?Higher%20Learning%20(1995)|0|0|0|0|0|0|0|0|1|0|0|0|0|0|0|0|0|0|0
1221|When a Man Loves a Woman (1994)|01-Jan-1994||http://us.imdb.com/M/title-exact?When%20a%20Man%20Loves%20a%20Woman%20(1994)|0|0|0|0|0|0|0|0|1|0|0|0|0|0|0|0|0|0|0
1222|Judgment Night (1993)|01-Jan-1993||http://us.imdb.com/M/title-exact?Judgment%20Night%20(1993)|0|1|0|0|0|0|0|0|0|0|0|0|0|0|0|0|0|0|0
1223|King of the Hill (1993)|01-Jan-1993||http://us.imdb.com/M/title-exact?King%20of%20the%20Hill%20(1993)|0|0|0|0|0|0|0|0|1|0|0|0|0|0|0|0|0|0|0
1224|Scout, The (1994)|01-Jan-1994||http://us.imdb.com/M/title-exact?Scout,%20The%20(1994)|0|0|0|0|0|0|0|0|1|0|0|0|0|0|0|0|0|0|0
1225|Angus (1995)|01-Jan-1995||http://us.imdb.com/M/title-exact?Angus%20(1995)|0|0|0|0|0|1|0|0|0|0|0|0|0|0|0|0|0|0|0
1226|Night Falls on Manhattan (1997)|16-May-1997||http://us.imdb.com/M/title-exact?Night%20Falls%20on%20Manhattan%20(1997)|0|0|0|0|0|0|1|0|1|0|0|0|0|0|0|0|0|0|0
1227|Awfully Big Adventure, An (1995)|01-Jan-1995||http://us.imdb.com/M/title-exact?Awfully%20Big%20Adventure,%20An%20(1995)|0|0|0|0|0|0|0|0|1|0|0|0|0|0|0|0|0|0|0
1228|Under Siege 2: Dark Territory (1995)|01-Jan-1995||http://us.imdb.com/M/title-exact?Under%20Siege%202:%20Dark%20Territory%20(1995)|0|1|0|0|0|0|0|0|0|0|0|0|0|0|0|0|0|0|0
1229|Poison Ivy II (1995)|01-Jan-1995||http://us.imdb.com/M/title-exact?Poison%20Ivy%20II%20(1995)|0|0|0|0|0|0|0|0|1|0|0|0|0|0|0|0|1|0|0
1230|Ready to Wear (Pret-A-Porter) (1994)|01-Jan-1994||http://us.imdb.com/Title?Pr%EAt-%E0-Porter+(1994)|0|0|0|0|0|1|0|0|0|0|0|0|0|0|0|0|0|0|0
1231|Marked for Death (1990)|01-Jan-1990||http://us.imdb.com/M/title-exact?Marked%20for%20Death%20(1990)|0|1|0|0|0|0|0|0|1|0|0|0|0|0|0|0|0|0|0
1232|Madonna: Truth or Dare (1991)|01-Jan-1991||http://us.imdb.com/M/title-exact?Madonna:%20Truth%20or%20Dare%20(1991)|0|0|0|0|0|0|0|1|0|0|0|0|0|0|0|0|0|0|0
1233|N�nette et Boni (1996)|01-Jan-1996||http://us.imdb.com/Title?N%E9nette+et+Boni+(1996)|0|0|0|0|0|0|0|0|1|0|0|0|0|0|0|0|0|0|0
1234|Chairman of the Board (1998)|01-Jan-1998||http://us.imdb.com/Title?Chairman+of+the+Board+(1998)|0|0|0|0|0|1|0|0|0|0|0|0|0|0|0|0|0|0|0
1235|Big Bang Theory, The (1994)|01-Jan-1994||http://us.imdb.com/M/title-exact?imdb-title-109266|0|0|0|0|0|0|1|0|0|0|0|0|0|0|0|0|0|0|0
1236|Other Voices, Other Rooms (1997)|01-Jan-1997||http://us.imdb.com/M/title-exact?imdb-title-119845|0|0|0|0|0|0|0|0|1|0|0|0|0|0|0|0|0|0|0
1237|Twisted (1996)|01-Jan-1996||http://us.imdb.com/M/title-exact?imdb-title-117994|0|0|0|0|0|1|0|0|1|0|0|0|0|0|0|0|0|0|0
1238|Full Speed (1996)|01-Jan-1996||http://us.imdb.com/M/title-exact?imdb-title-118230|0|0|0|0|0|0|0|0|1|0|0|0|0|0|0|0|0|0|0
1239|Cutthroat Island (1995)|01-Jan-1995||http://us.imdb.com/M/title-exact?Cutthroat%20Island%20(1995)|0|1|1|0|0|0|0|0|0|0|0|0|0|0|1|0|0|0|0
1240|Ghost in the Shell (Kokaku kidotai) (1995)|12-Apr-1996||http://us.imdb.com/M/title-exact?Kokaku%20Kidotai%20(1995)|0|0|0|1|0|0|0|0|0|0|0|0|0|0|0|1|0|0|0
1241|Van, The (1996)|27-Jun-1997||http://us.imdb.com/M/title-exact?Van%2C%20The%20(1996)|0|0|0|0|0|1|0|0|1|0|0|0|0|0|0|0|0|0|0
1242|Old Lady Who Walked in the Sea, The (Vieille qui marchait dans la mer, La) (1991)|01-Jan-1991||http://us.imdb.com/M/title-exact?Vieille%20qui%20marchait%20dans%20la%20mer,%20La%20(1991)|0|0|0|0|0|1|0|0|0|0|0|0|0|0|0|0|0|0|0
1243|Night Flier (1997)|06-Feb-1998||http://us.imdb.com/M/title-exact?Night+Flier+(1997)|0|0|0|0|0|0|0|0|0|0|0|1|0|0|0|0|0|0|0
1244|Metro (1997)|17-Jan-1997||http://us.imdb.com/M/title-exact?Metro%20(1997)|0|1|0|0|0|0|0|0|0|0|0|0|0|0|0|0|0|0|0
1245|Gridlock'd (1997)|29-Jan-1997||http://us.imdb.com/M/title-exact?Gridlock'd%20(1997)|0|0|0|0|0|0|1|0|0|0|0|0|0|0|0|0|0|0|0
1246|Bushwhacked (1995)|01-Jan-1995||http://us.imdb.com/Title?Bushwhacked+(1995/I)|0|0|0|0|0|1|0|0|0|0|0|0|0|0|0|0|0|0|0
1247|Bad Girls (1994)|01-Jan-1994||http://us.imdb.com/Title?Bad+Girls+(1994/I)|0|0|0|0|0|0|0|0|0|0|0|0|0|0|0|0|0|0|1
1248|Blink (1994)|01-Jan-1994||http://us.imdb.com/M/title-exact?Blink%20(1994)|0|0|0|0|0|0|0|0|0|0|0|0|0|0|0|0|1|0|0
1249|For Love or Money (1993)|01-Jan-1993||http://us.imdb.com/M/title-exact?For%20Love%20or%20Money%20(1993)|0|0|0|0|0|1|0|0|0|0|0|0|0|0|0|0|0|0|0
1250|Best of the Best 3: No Turning Back (1995)|01-Jan-1995||http://us.imdb.com/M/title-exact?Best%20of%20the%20Best%203:%20No%20Turning%20Back%20(1995)|0|1|0|0|0|0|0|0|0|0|0|0|0|0|0|0|0|0|0
1251|A Chef in Love (1996)|25-Apr-1997||http://us.imdb.com/M/title-exact?Mille%20et%20une%20recettes%20du%20cuisinier%20amoureux%2C%20Les%20%281996%29|0|0|0|0|0|1|0|0|0|0|0|0|0|0|0|0|0|0|0
1252|Contempt (M�pris, Le) (1963)|27-Jun-1997||http://us.imdb.com/M/title-exact?M%E9pris%2C+Le+(1963)|0|0|0|0|0|0|0|0|1|0|0|0|0|0|0|0|0|0|0
1253|Tie That Binds, The (1995)|01-Jan-1995||http://us.imdb.com/M/title-exact?Tie%20That%20Binds,%20The%20(1995)|0|0|0|0|0|0|0|0|0|0|0|0|0|0|0|0|1|0|0
1254|Gone Fishin' (1997)|30-May-1997||http://us.imdb.com/M/title-exact?Gone%20Fishin'%20(1997)|0|0|0|0|0|1|0|0|0|0|0|0|0|0|0|0|0|0|0
1255|Broken English (1996)|02-May-1997||http://us.imdb.com/M/title-exact?Broken%20English%20%281996%29|0|0|0|0|0|0|0|0|1|0|0|0|0|0|0|0|0|0|0
1256|Designated Mourner, The (1997)|23-May-1997||http://us.imdb.com/M/title-exact?Designated%20Mourner%2C%20The%20%281997%29|0|0|0|0|0|0|0|0|1|0|0|0|0|0|0|0|0|0|0
1257|Designated Mourner, The (1997)|23-May-1997||http://us.imdb.com/M/title-exact?Designated%20Mourner%2C%20The%20%281997%29|0|0|0|0|0|0|0|0|1|0|0|0|0|0|0|0|0|0|0
1258|Trial and Error (1997)|30-May-1997||http://us.imdb.com/M/title-exact?Trial%20and%20Error%20%281997%29|0|0|0|0|0|1|0|0|0|0|0|0|0|0|1|0|0|0|0
1259|Pie in the Sky (1995)|09-Feb-1996||http://us.imdb.com/M/title-exact?Pie%20in%20the%20Sky%20(1995)|0|0|0|0|0|1|0|0|0|0|0|0|0|0|1|0|0|0|0
1260|Total Eclipse (1995)|01-Jan-1995||http://us.imdb.com/M/title-exact?Total%20Eclipse%20(1995)|0|0|0|0|0|0|0|0|1|0|0|0|0|0|0|0|0|0|0
1261|Run of the Country, The (1995)|01-Jan-1995||http://us.imdb.com/M/title-exact?Run%20of%20the%20Country,%20The%20(1995)|0|0|0|0|0|0|0|0|1|0|0|0|0|0|0|0|0|0|0
1262|Walking and Talking (1996)|12-Jul-1996||http://us.imdb.com/M/title-exact?Walking%20and%20Talking%20(1996)|0|0|0|0|0|0|0|0|0|0|0|0|0|0|1|0|0|0|0
1263|Foxfire (1996)|23-Aug-1996||http://us.imdb.com/M/title-exact?Foxfire%20(1996)|0|0|0|0|0|0|0|0|1|0|0|0|0|0|0|0|0|0|0
1264|Nothing to Lose (1994)|16-Aug-1996||http://us.imdb.com/M/title-exact?Nothing%20to%20Lose%20(1994)|0|0|0|0|0|0|0|0|1|0|0|0|0|0|0|0|0|0|0
1265|Star Maps (1997)|01-Jan-1997||http://us.imdb.com/M/title-exact?Star+Maps+(1997)|0|0|0|0|0|0|0|0|1|0|0|0|0|0|0|0|0|0|0
1266|Bread and Chocolate (Pane e cioccolata) (1973)|01-Jan-1973||http://us.imdb.com/M/title-exact?Pane%20e%20Cioccolata%20(1973)|0|0|0|0|0|0|0|0|1|0|0|0|0|0|0|0|0|0|0
1267|Clockers (1995)|01-Jan-1995||http://us.imdb.com/M/title-exact?Clockers%20(1995)|0|0|0|0|0|0|0|0|1|0|0|0|0|0|0|0|0|0|0
1268|Bitter Moon (1992)|01-Jan-1992||http://us.imdb.com/M/title-exact?Lunes%20de%20fiel%20(1992)|0|0|0|0|0|0|0|0|1|0|0|0|0|0|0|0|0|0|0
1269|Love in the Afternoon (1957)|01-Jan-1957||http://us.imdb.com/M/title-exact?Love%20in%20the%20Afternoon%20(1957)|0|0|0|0|0|1|0|0|0|0|0|0|0|0|1|0|0|0|0
1270|Life with Mikey (1993)|01-Jan-1993||http://us.imdb.com/M/title-exact?Life%20with%20Mikey%20(1993)|0|0|0|0|0|1|0|0|0|0|0|0|0|0|0|0|0|0|0
1271|North (1994)|01-Jan-1994||http://us.imdb.com/M/title-exact?North%20(1994)|0|0|0|0|0|1|0|0|0|0|0|0|0|0|0|0|0|0|0
1272|Talking About Sex (1994)|01-Jan-1994||http://us.imdb.com/M/title-exact?Talking%20About%20Sex%20(1994)|0|0|0|0|0|1|0|0|1|0|0|0|0|0|0|0|0|0|0
1273|Color of Night (1994)|01-Jan-1994||http://us.imdb.com/M/title-exact?Color%20of%20Night%20(1994)|0|0|0|0|0|0|0|0|1|0|0|0|0|0|0|0|1|0|0
1274|Robocop 3 (1993)|01-Jan-1993||http://us.imdb.com/M/title-exact?Robocop%203%20(1993)|0|0|0|0|0|0|0|0|0|0|0|0|0|0|0|1|1|0|0
1275|Killer (Bulletproof Heart) (1994)|01-Jan-1994||http://us.imdb.com/M/title-exact?Killer%20(1994)|0|0|0|0|0|0|0|0|0|0|0|0|0|0|0|0|1|0|0
1276|Sunset Park (1996)|26-Apr-1996||http://us.imdb.com/M/title-exact?Sunset%20Park%20(1996)|0|0|0|0|0|0|0|0|1|0|0|0|0|0|0|0|0|0|0
1277|Set It Off (1996)|25-Sep-1996||http://us.imdb.com/M/title-exact?Set%20It%20Off%20(1996)|0|1|0|0|0|0|1|0|0|0|0|0|0|0|0|0|0|0|0
1278|Selena (1997)|21-Mar-1997||http://us.imdb.com/M/title-exact?Selena%20(1997)|0|0|0|0|0|0|0|0|1|0|0|0|1|0|0|0|0|0|0
1279|Wild America (1997)|04-Jul-1997||http://us.imdb.com/M/title-exact?Wild+America+(1997)|0|0|1|0|1|0|0|0|0|0|0|0|0|0|0|0|0|0|0
1280|Gang Related (1997)|01-Jan-1997||http://us.imdb.com/M/title-exact?Gang+Related+(1997)|0|0|0|0|0|0|1|0|0|0|0|0|0|0|0|0|0|0|0
1281|Manny & Lo (1996)|26-Jul-1996||http://us.imdb.com/M/title-exact?Manny%20&%20Lo%20(1996)|0|0|0|0|0|0|0|0|1|0|0|0|0|0|0|0|0|0|0
1282|Grass Harp, The (1995)|11-Oct-1996||http://us.imdb.com/M/title-exact?Grass%20Harp,%20The%20(1995)|0|0|0|0|0|0|0|0|1|0|0|0|0|0|0|0|0|0|0
1283|Out to Sea (1997)|04-Jul-1997||http://us.imdb.com/M/title-exact?Out+to+Sea+(1997)|0|0|0|0|0|1|0|0|0|0|0|0|0|0|0|0|0|0|0
1284|Before and After (1996)|23-Feb-1996||http://us.imdb.com/M/title-exact?Before%20and%20After%20(1996)|0|0|0|0|0|0|0|0|1|0|0|0|0|1|0|0|0|0|0
1285|Princess Caraboo (1994)|01-Jan-1994||http://us.imdb.com/M/title-exact?Princess%20Caraboo%20(1994)|0|0|0|0|0|0|0|0|1|0|0|0|0|0|0|0|0|0|0
1286|Shall We Dance? (1937)|01-Jan-1937||http://us.imdb.com/M/title-exact?Shall%20We%20Dance?%20(1937)|0|0|0|0|0|1|0|0|0|0|0|0|1|0|1|0|0|0|0
1287|Ed (1996)|08-Mar-1996||http://us.imdb.com/M/title-exact?Ed%20(1996)|0|0|0|0|0|1|0|0|0|0|0|0|0|0|0|0|0|0|0
1288|Denise Calls Up (1995)|29-Mar-1996||http://us.imdb.com/M/title-exact?Denise%20Calls%20Up%20(1995)|0|0|0|0|0|1|0|0|0|0|0|0|0|0|0|0|0|0|0
1289|Jack and Sarah (1995)|22-Mar-1996||http://us.imdb.com/M/title-exact?Jack%20and%20Sarah%20(1995)|0|0|0|0|0|0|0|0|0|0|0|0|0|0|1|0|0|0|0
1290|Country Life (1994)|01-Jan-1994||http://us.imdb.com/M/title-exact?Country%20Life%20(1994)|0|0|0|0|0|0|0|0|1|0|0|0|0|0|1|0|0|0|0
1291|Celtic Pride (1996)|19-Apr-1996||http://us.imdb.com/M/title-exact?Celtic%20Pride%20(1996)|0|0|0|0|0|1|0|0|0|0|0|0|0|0|0|0|0|0|0
1292|Simple Wish, A (1997)|11-Jul-1997||http://us.imdb.com/M/title-exact?Simple+Wish%2C+A+(1997)|0|0|0|0|1|0|0|0|0|1|0|0|0|0|0|0|0|0|0
1293|Star Kid (1997)|16-Jan-1998||http://us.imdb.com/M/title-exact?imdb-title-120478|0|0|1|0|1|0|0|0|0|1|0|0|0|0|0|1|0|0|0
1294|Ayn Rand: A Sense of Life (1997)|13-Feb-1998||http://us.imdb.com/Title?Ayn+Rand%3A+A+Sense+of+Life+(1997)|0|0|0|0|0|0|0|1|0|0|0|0|0|0|0|0|0|0|0
1295|Kicked in the Head (1997)|01-Jan-1997||http://us.imdb.com/M/title-exact?Kicked+in+the+Head+(1997)|0|0|0|0|0|1|0|0|1|0|0|0|0|0|0|0|0|0|0
1296|Indian Summer (1996)|01-Jan-1996||http://us.imdb.com/M/title-exact?Indian+Summer+(1996)|0|0|0|0|0|1|0|0|1|0|0|0|0|0|0|0|0|0|0
1297|Love Affair (1994)|01-Jan-1994||http://us.imdb.com/M/title-exact?Love%20Affair%20(1994)|0|0|0|0|0|0|0|0|1|0|0|0|0|0|1|0|0|0|0
1298|Band Wagon, The (1953)|01-Jan-1953||http://us.imdb.com/M/title-exact?Band%20Wagon,%20The%20(1953)|0|0|0|0|0|1|0|0|0|0|0|0|1|0|0|0|0|0|0
1299|Penny Serenade (1941)|01-Jan-1941||http://us.imdb.com/M/title-exact?Penny%20Serenade%20(1941)|0|0|0|0|0|0|0|0|1|0|0|0|0|0|1|0|0|0|0
1300|'Til There Was You (1997)|30-May-1997||http://us.imdb.com/Title?%27Til+There+Was+You+(1997)|0|0|0|0|0|0|0|0|1|0|0|0|0|0|1|0|0|0|0
1301|Stripes (1981)|01-Jan-1981||http://us.imdb.com/M/title-exact?Stripes+(1981)|0|0|0|0|0|1|0|0|0|0|0|0|0|0|0|0|0|0|0
1302|Late Bloomers (1996)|06-Jun-1997||http://us.imdb.com/M/title-exact?Late%20Bloomers%20%281996%29|0|0|0|0|0|1|0|0|0|0|0|0|0|0|0|0|0|0|0
1303|Getaway, The (1994)|01-Jan-1994||http://us.imdb.com/M/title-exact?Getaway,%20The%20(1994)|0|1|0|0|0|0|0|0|0|0|0|0|0|0|0|0|0|0|0
1304|New York Cop (1996)|01-Jan-1996||http://us.imdb.com/Title?New+York+Cop+(1996)|0|1|0|0|0|0|1|0|0|0|0|0|0|0|0|0|0|0|0
1305|National Lampoon's Senior Trip (1995)|01-Jan-1995||http://us.imdb.com/M/title-exact?National%20Lampoon's%20Senior%20Trip%20(1995)|0|0|0|0|0|1|0|0|0|0|0|0|0|0|0|0|0|0|0
1306|Delta of Venus (1994)|01-Jan-1994||http://us.imdb.com/M/title-exact?Delta%20of%20Venus%20(1994)|0|0|0|0|0|0|0|0|1|0|0|0|0|0|0|0|0|0|0
1307|Carmen Miranda: Bananas Is My Business (1994)|01-Jan-1994||http://us.imdb.com/M/title-exact?Carmen%20Miranda:%20Bananas%20Is%20My%20Business%20(1994)|0|0|0|0|0|0|0|1|0|0|0|0|0|0|0|0|0|0|0
1308|Babyfever (1994)|01-Jan-1994||http://us.imdb.com/M/title-exact?Babyfever%20(1994)|0|0|0|0|0|1|0|0|1|0|0|0|0|0|0|0|0|0|0
1309|Very Natural Thing, A (1974)|01-Jan-1974||http://us.imdb.com/M/title-exact?Very%20Natural%20Thing,%20A%20(1974)|0|0|0|0|0|0|0|0|1|0|0|0|0|0|0|0|0|0|0
1310|Walk in the Sun, A (1945)|01-Jan-1945||http://us.imdb.com/M/title-exact?Walk%20in%20the%20Sun,%20A%20(1945)|0|0|0|0|0|0|0|0|1|0|0|0|0|0|0|0|0|0|0
1311|Waiting to Exhale (1995)|15-Jan-1996||http://us.imdb.com/M/title-exact?Waiting%20to%20Exhale%20(1995)|0|0|0|0|0|1|0|0|1|0|0|0|0|0|0|0|0|0|0
1312|Pompatus of Love, The (1996)|26-Jul-1996||http://us.imdb.com/M/title-exact?Pompatus%20of%20Love,%20The%20(1996)|0|0|0|0|0|1|0|0|1|0|0|0|0|0|0|0|0|0|0
1313|Palmetto (1998)|20-Feb-1998||http://us.imdb.com/M/title-exact?Palmetto+(1998)|0|0|0|0|0|0|0|0|0|0|1|0|0|1|0|0|1|0|0
1314|Surviving the Game (1994)|01-Jan-1994||http://us.imdb.com/M/title-exact?Surviving%20the%20Game%20(1994)|0|1|1|0|0|0|0|0|0|0|0|0|0|0|0|0|1|0|0
1315|Inventing the Abbotts (1997)|04-Apr-1997||http://us.imdb.com/M/title-exact?Inventing%20the%20Abbotts%20%281997%29|0|0|0|0|0|0|0|0|1|0|0|0|0|0|1|0|0|0|0
1316|Horse Whisperer, The (1998)|25-Dec-1997||http://us.imdb.com/M/title-exact?imdb-title-119314|0|0|0|0|0|0|0|0|1|0|0|0|0|0|0|0|0|0|0
1317|Journey of August King, The (1995)|22-Mar-1996||http://us.imdb.com/M/title-exact?Journey%20of%20August%20King,%20The%20(1995)|0|0|0|0|0|0|0|0|1|0|0|0|0|0|0|0|0|0|0
1318|Catwalk (1995)|07-Jun-1996||http://us.imdb.com/Title?Catwalk+(1995/I)|0|0|0|0|0|0|0|1|0|0|0|0|0|0|0|0|0|0|0
1319|Neon Bible, The (1995)|01-Mar-1996||http://us.imdb.com/M/title-exact?Neon%20Bible,%20The%20(1995)|0|0|0|0|0|0|0|0|1|0|0|0|0|0|0|0|0|0|0
1320|Homage (1995)|03-May-1996||http://us.imdb.com/M/title-exact?Homage%20(1995)|0|0|0|0|0|0|0|0|1|0|0|0|0|0|0|0|0|0|0
1321|Open Season (1996)|10-May-1996||http://us.imdb.com/Title?Open+Season+(1996)|0|0|0|0|0|1|0|0|0|0|0|0|0|0|0|0|0|0|0
1322|Metisse (Caf� au Lait) (1993)|01-Jan-1993||http://us.imdb.com/Title?M%E9tisse+(1993)|0|0|0|0|0|1|0|0|0|0|0|0|0|0|0|0|0|0|0
1323|Wooden Man's Bride, The (Wu Kui) (1994)|01-Jan-1994||http://us.imdb.com/M/title-exact?Wu%20Kui%20(1994)|0|0|0|0|0|0|0|0|1|0|0|0|0|0|0|0|0|0|0
1324|Loaded (1994)|12-Apr-1996||http://us.imdb.com/M/title-exact?Loaded%20(1994)|0|0|0|0|0|0|0|0|1|0|0|0|0|0|0|0|1|0|0
1325|August (1996)|12-Apr-1996||http://us.imdb.com/M/title-exact?August%20(1996)|0|0|0|0|0|0|0|0|1|0|0|0|0|0|0|0|0|0|0
1326|Boys (1996)|10-May-1996||http://us.imdb.com/M/title-exact?Boys%20(1996)|0|0|0|0|0|0|0|0|1|0|0|0|0|0|0|0|0|0|0
1327|Captives (1994)|16-Sep-1994||http://us.imdb.com/Title?Captives+(1994)|0|0|0|0|0|0|0|0|1|0|0|0|0|0|0|0|0|0|0
1328|Of Love and Shadows (1994)|10-May-1996||http://us.imdb.com/M/title-exact?Of%20Love%20and%20Shadows%20(1994)|0|0|0|0|0|0|0|0|1|0|0|0|0|0|0|0|0|0|0
1329|Low Life, The (1994)|10-May-1996||http://us.imdb.com/Title?Low+Life,+The+(1994/I)|0|0|0|0|0|0|0|0|1|0|0|0|0|0|0|0|0|0|0
1330|An Unforgettable Summer (1994)|01-Jan-1994||http://us.imdb.com/Title?Un+%E9t%E9+inoubliable+(1994)|0|0|0|0|0|0|0|0|1|0|0|0|0|0|0|0|0|0|0
1331|Last Klezmer: Leopold Kozlowski, His Life and Music, The (1995)|01-Jan-1995||http://us.imdb.com/M/title-exact?Last%20Klezmer%3A%20Leopold%20Kozlowski%2C%20His%20Life%20and%20Music%2C%20The%20%281995%29|0|0|0|0|0|0|0|1|0|0|0|0|0|0|0|0|0|0|0
1332|My Life and Times With Antonin Artaud (En compagnie d'Antonin Artaud) (1993)|01-Jan-1993||http://us.imdb.com/M/title-exact?En%20compagnie%20d'Antonin%20Artaud%20(1993)|0|0|0|0|0|0|0|0|1|0|0|0|0|0|0|0|0|0|0
1333|Midnight Dancers (Sibak) (1994)|01-Jan-1994||http://us.imdb.com/M/title-exact?Sibak%20(1994)|0|0|0|0|0|1|0|0|1|0|0|0|0|0|0|0|0|0|0
1334|Somebody to Love (1994)|14-Jun-1996||http://us.imdb.com/Title?Somebody+to+Love+(1996)|0|0|0|0|0|0|0|0|1|0|0|0|0|0|0|0|0|0|0
1335|American Buffalo (1996)|13-Sep-1996||http://us.imdb.com/M/title-exact?American%20Buffalo%20(1996)|0|0|0|0|0|0|0|0|1|0|0|0|0|0|0|0|0|0|0
1336|Kazaam (1996)|17-Jul-1996||http://us.imdb.com/M/title-exact?Kazaam%20(1996)|0|0|0|0|1|1|0|0|0|1|0|0|0|0|0|0|0|0|0
1337|Larger Than Life (1996)|01-Nov-1996||http://us.imdb.com/M/title-exact?Larger%20Than%20Life%20(1996)|0|0|0|0|0|1|0|0|0|0|0|0|0|0|0|0|0|0|0
1338|Two Deaths (1995)|09-Aug-1996||http://us.imdb.com/Title?Two+Deaths+(1995)|0|0|0|0|0|0|0|0|1|0|0|0|0|0|0|0|0|0|0
1339|Stefano Quantestorie (1993)|01-Jan-1993||http://us.imdb.com/M/title-exact?Stefano%20Quantestorie%20%281993%29|0|0|0|0|0|1|0|0|1|0|0|0|0|0|0|0|0|0|0
1340|Crude Oasis, The (1995)|01-Jan-1995||http://us.imdb.com/M/title-exact?Crude%20Oasis,%20The%20(1995)|0|0|0|0|0|0|0|0|0|0|0|0|0|0|1|0|0|0|0
1341|Hedd Wyn (1992)|01-Jan-1992||http://us.imdb.com/M/title-exact?Hedd%20Wyn%20(1992)|0|0|0|0|0|0|0|0|1|0|0|0|0|0|0|0|0|0|0
1342|Convent, The (Convento, O) (1995)|14-Jun-1996||http://us.imdb.com/M/title-exact?Convento,%20O%20(1995)|0|0|0|0|0|0|0|0|1|0|0|0|0|0|0|0|0|0|0
1343|Lotto Land (1995)|01-Jan-1995||http://us.imdb.com/M/title-exact?Lotto%20Land%20(1995)|0|0|0|0|0|0|0|0|1|0|0|0|0|0|0|0|0|0|0
1344|Story of Xinghua, The (1993)|01-Jan-1993||http://us.imdb.com/M/title-exact?Story%20of%20Xinghua,%20The%20(1993)|0|0|0|0|0|0|0|0|1|0|0|0|0|0|0|0|0|0|0
1345|Day the Sun Turned Cold, The (Tianguo niezi) (1994)|01-Jan-1994||http://us.imdb.com/M/title-exact?Tianguo%20Niezi%20(1994)|0|0|0|0|0|0|0|0|1|0|0|0|0|0|0|0|0|0|0
1346|Dingo (1992)|01-Jan-1992||http://us.imdb.com/M/title-exact?Dingo%20(1992)|0|0|0|0|0|0|0|0|1|0|0|0|0|0|0|0|0|0|0
1347|Ballad of Narayama, The (Narayama Bushiko) (1958)|01-Jan-1958||http://us.imdb.com/M/title-exact?Narayama%20Bushiko%20%281958%29|0|0|0|0|0|0|0|0|1|0|0|0|0|0|0|0|0|0|0
1348|Every Other Weekend (1990)|01-Jan-1990||http://us.imdb.com/Title?Un+week-end+sur+deux+(1990)|0|0|0|0|0|0|0|0|1|0|0|0|0|0|0|0|0|0|0
1349|Mille bolle blu (1993)|01-Jan-1993||http://us.imdb.com/M/title-exact?Mille%20bolle%20blu%20(1993)|0|0|0|0|0|1|0|0|0|0|0|0|0|0|0|0|0|0|0
1350|Crows and Sparrows (1949)|01-Jan-1949||http://us.imdb.com/Title?Wuya+yu+maque+(1949)|0|0|0|0|0|0|0|0|1|0|0|0|0|0|0|0|0|0|0
1351|Lover's Knot (1996)|12-Jul-1996||http://us.imdb.com/M/title-exact?Lover's%20Knot%20(1996)|0|0|0|0|0|1|0|0|0|0|0|0|0|0|0|0|0|0|0
1352|Shadow of Angels (Schatten der Engel) (1976)|01-Jan-1976||http://us.imdb.com/M/title-exact?Schatten%20der%20Engel%20(1976)|0|0|0|0|0|0|0|0|1|0|0|0|0|0|0|0|0|0|0
1353|1-900 (1994)|01-Jan-1994||http://us.imdb.com/M/title-exact?06%20(1994)|0|0|0|0|0|0|0|0|0|0|0|0|0|0|1|0|0|0|0
1354|Venice/Venice (1992)|01-Jan-1992||http://us.imdb.com/M/title-exact?Venice/Venice%20(1992)|0|0|0|0|0|0|0|0|1|0|0|0|0|0|0|0|0|0|0
1355|Infinity (1996)|04-Oct-1996||http://us.imdb.com/M/title-exact?Infinity%20(1996)|0|0|0|0|0|0|0|0|1|0|0|0|0|0|0|0|0|0|0
1356|Ed's Next Move (1996)|04-Oct-1996||http://us.imdb.com/M/title-exact?Ed%27s%20Next%20Move%20%281996%29|0|0|0|0|0|1|0|0|0|0|0|0|0|0|0|0|0|0|0
1357|For the Moment (1994)|01-Jan-1994||http://us.imdb.com/M/title-exact?For%20the%20Moment%20(1994)|0|0|0|0|0|0|0|0|0|0|0|0|0|0|1|0|0|1|0
1358|The Deadly Cure (1996)|16-Sep-1996|||0|1|0|0|0|0|0|0|0|0|0|0|0|0|0|0|0|0|0
1359|Boys in Venice (1996)|24-Sep-1996|||0|0|0|0|0|0|0|0|1|0|0|0|0|0|0|0|0|0|0
1360|Sexual Life of the Belgians, The (1994)|01-Jan-1994||http://us.imdb.com/M/title-exact?Vie%20sexuelle%20des%20Belges,%20La%20(1994)|0|0|0|0|0|1|0|0|0|0|0|0|0|0|0|0|0|0|0
1361|Search for One-eye Jimmy, The (1996)|01-Jan-1996||http://us.imdb.com/M/title-exact?Search%20for%20One-eye%20Jimmy,%20The%20(1996)|0|0|0|0|0|1|0|0|0|0|0|0|0|0|0|0|0|0|0
1362|American Strays (1996)|13-Sep-1996||http://us.imdb.com/M/title-exact?American%20Strays%20(1996)|0|1|0|0|0|0|0|0|0|0|0|0|0|0|0|0|0|0|0
1363|Leopard Son, The (1996)|27-Sep-1996||http://us.imdb.com/M/title-exact?Leopard%20Son,%20The%20(1996)|0|0|0|0|0|0|0|1|0|0|0|0|0|0|0|0|0|0|0
1364|Bird of Prey (1996)|04-Oct-1996||http://us.imdb.com/M/title-exact?Bird%20of%20Prey%20(1996)|0|1|0|0|0|0|0|0|0|0|0|0|0|0|0|0|0|0|0
1365|Johnny 100 Pesos (1993)|01-Jan-1993||http://us.imdb.com/M/title-exact?Johnny%20100%20Pesos%20(1993)|0|1|0|0|0|0|0|0|1|0|0|0|0|0|0|0|0|0|0
1366|JLG/JLG - autoportrait de d�cembre (1994)|01-Jan-1994||http://us.imdb.com/M/title-exact?JLG/JLG%20-%20autoportrait%20de%20d%E9cembre%20%281994%29|0|0|0|0|0|0|0|1|1|0|0|0|0|0|0|0|0|0|0
1367|Faust (1994)|01-Jan-1994||http://us.imdb.com/M/title-exact?Faust%20%281994%29|0|0|0|1|0|0|0|0|0|0|0|0|0|0|0|0|0|0|0
1368|Mina Tannenbaum (1994)|01-Jan-1994||http://us.imdb.com/M/title-exact?Mina%20Tannenbaum%20(1994)|0|0|0|0|0|0|0|0|1|0|0|0|0|0|0|0|0|0|0
1369|Forbidden Christ, The (Cristo proibito, Il) (1950)|01-Jan-1950||http://us.imdb.com/M/title-exact?Cristo%20proibito%2C%20Il%20%281950%29|0|0|0|0|0|0|0|0|1|0|0|0|0|0|0|0|0|0|0
1370|I Can't Sleep (J'ai pas sommeil) (1994)|01-Jan-1994||http://us.imdb.com/M/title-exact?J'ai%20pas%20sommeil%20(1994)|0|0|0|0|0|0|0|0|1|0|0|0|0|0|0|0|1|0|0
1371|Machine, The (1994)|01-Jan-1994||http://us.imdb.com/M/title-exact?Machine,%20La%20(1994)|0|0|0|0|0|1|0|0|0|0|0|1|0|0|0|0|0|0|0
1372|Stranger, The (1994)|01-Jan-1994||http://us.imdb.com/Title?Stranger,+The+(1994/II)|0|1|0|0|0|0|0|0|0|0|0|0|0|0|0|0|0|0|0
1373|Good Morning (1971)|4-Feb-1971||http://us.imdb.com/M/title-exact?Good%20Morning%20(1971)|1|0|0|0|0|0|0|0|0|0|0|0|0|0|0|0|0|0|0
1374|Falling in Love Again (1980)|01-Jan-1980||http://us.imdb.com/M/title-exact?Falling%20in%20Love%20Again%20(1980)|0|0|0|0|0|1|0|0|0|0|0|0|0|0|0|0|0|0|0
1375|Cement Garden, The (1993)|01-Jan-1993||http://us.imdb.com/M/title-exact?Cement%20Garden,%20The%20(1993)|0|0|0|0|0|0|0|0|1|0|0|0|0|0|0|0|0|0|0
1376|Meet Wally Sparks (1997)|31-Jan-1997||http://us.imdb.com/M/title-exact?Meet%20Wally%20Sparks%20(1997)|0|0|0|0|0|1|0|0|0|0|0|0|0|0|0|0|0|0|0
1377|Hotel de Love (1996)|07-Feb-1997||http://us.imdb.com/M/title-exact?Hotel%20de%20Love%20(1996)|0|0|0|0|0|1|0|0|0|0|0|0|0|0|1|0|0|0|0
1378|Rhyme & Reason (1997)|05-Mar-1997||http://us.imdb.com/M/title-exact?Rhyme%20%26%20Reason%20(1997)|0|0|0|0|0|0|0|1|0|0|0|0|0|0|0|0|0|0|0
1379|Love and Other Catastrophes (1996)|28-Mar-1997||http://us.imdb.com/M/title-exact?Love%20and%20Other%20Catastrophes%20%281996%29|0|0|0|0|0|0|0|0|0|0|0|0|0|0|1|0|0|0|0
1380|Hollow Reed (1996)|02-May-1997||http://us.imdb.com/Title?Hollow+Reed+(1996)|0|0|0|0|0|0|0|0|1|0|0|0|0|0|0|0|0|0|0
1381|Losing Chase (1996)|01-Jan-1996||http://us.imdb.com/M/title-exact?Losing%20Chase%20%281996%29|0|0|0|0|0|0|0|0|1|0|0|0|0|0|0|0|0|0|0
1382|Bonheur, Le (1965)|16-May-1997||http://us.imdb.com/M/title-exact?Bonheur%2C%20Le%20%281965%29|0|0|0|0|0|0|0|0|1|0|0|0|0|0|0|0|0|0|0
1383|Second Jungle Book: Mowgli & Baloo, The (1997)|16-May-1997||http://us.imdb.com/M/title-exact?Second%20Jungle%20Book%3A%20Mowgli%20%26%20Baloo%2C%20The%20%281997%29|0|0|1|0|1|0|0|0|0|0|0|0|0|0|0|0|0|0|0
1384|Squeeze (1996)|13-Jun-1997||http://us.imdb.com/M/title-exact?Squeeze%20%281996%29|0|0|0|0|0|0|0|0|1|0|0|0|0|0|0|0|0|0|0
1385|Roseanna's Grave (For Roseanna) (1997)|20-Jun-1997||http://us.imdb.com/M/title-exact?Roseanna%27s+Grave+(1997)|0|0|0|0|0|1|0|0|0|0|0|0|0|0|1|0|0|0|0
1386|Tetsuo II: Body Hammer (1992)|20-Jun-1997||http://us.imdb.com/M/title-exact?Tetsuo+II%3A+Body+Hammer+(1992)|0|0|0|0|0|0|0|0|0|0|0|0|0|0|0|1|0|0|0
1387|Fall (1997)|27-Jun-1997||http://us.imdb.com/M/title-exact?Fall+(1997)|0|0|0|0|0|0|0|0|0|0|0|0|0|0|1|0|0|0|0
1388|Gabbeh (1996)|27-Jun-1997||http://us.imdb.com/M/title-exact?Gabbeh+(1996)|0|0|0|0|0|0|0|0|1|0|0|0|0|0|0|0|0|0|0
1389|Mondo (1996)|27-Jun-1997||http://us.imdb.com/M/title-exact?Mondo+(1996)|0|0|0|0|0|0|0|0|1|0|0|0|0|0|0|0|0|0|0
1390|Innocent Sleep, The (1995)|27-Jun-1997||http://us.imdb.com/M/title-exact?Innocent+Sleep%2C+The+(1995)|0|0|0|0|0|0|1|0|0|0|0|0|0|0|0|0|0|0|0
1391|For Ever Mozart (1996)|04-Jul-1997||http://us.imdb.com/M/title-exact?For+Ever+Mozart+(1996)|0|0|0|0|0|0|0|0|1|0|0|0|0|0|0|0|0|0|0
1392|Locusts, The (1997)|01-Jan-1997||http://us.imdb.com/M/title-exact?Locusts%2C+The+(1997)|0|0|0|0|0|0|0|0|1|0|0|0|0|0|0|0|0|0|0
1393|Stag (1997)|01-Jan-1997||http://us.imdb.com/M/title-exact?Stag+(1997)|0|1|0|0|0|0|0|0|0|0|0|0|0|0|0|0|1|0|0
1394|Swept from the Sea (1997)|01-Jan-1997||http://us.imdb.com/M/title-exact?Swept+from+the+Sea+(1997)|0|0|0|0|0|0|0|0|0|0|0|0|0|0|1|0|0|0|0
1395|Hurricane Streets (1998)|01-Jan-1998||http://us.imdb.com/Title?Hurricane+Streets+(1998)|0|0|0|0|0|0|0|0|1|0|0|0|0|0|0|0|0|0|0
1396|Stonewall (1995)|26-Jul-1996||http://us.imdb.com/M/title-exact?Stonewall%20(1995)|0|0|0|0|0|0|0|0|1|0|0|0|0|0|0|0|0|0|0
1397|Of Human Bondage (1934)|01-Jan-1934||http://us.imdb.com/M/title-exact?Of%20Human%20Bondage%20(1934)|0|0|0|0|0|0|0|0|1|0|0|0|0|0|0|0|0|0|0
1398|Anna (1996)|13-Nov-1996||http://us.imdb.com/M/title-exact?Anna%20(1996)|0|0|0|0|0|0|0|0|1|0|0|0|0|0|0|0|0|0|0
1399|Stranger in the House (1997)|01-Jan-1997||http://us.imdb.com/M/title-exact?imdb-title-120222|0|0|0|0|0|0|0|0|0|0|0|0|0|0|0|0|1|0|0
1400|Picture Bride (1995)|01-Jan-1995||http://us.imdb.com/M/title-exact?Picture%20Bride%20(1995)|0|0|0|0|0|0|0|0|1|0|0|0|0|0|1|0|0|0|0
1401|M. Butterfly (1993)|01-Jan-1993||http://us.imdb.com/M/title-exact?M.%20Butterfly%20(1993)|0|0|0|0|0|0|0|0|1|0|0|0|0|0|0|0|0|0|0
1402|Ciao, Professore! (1993)|01-Jan-1993||http://us.imdb.com/M/title-exact?Io%20speriamo%20che%20me%20la%20cavo%20(1993)|0|0|0|0|0|0|0|0|1|0|0|0|0|0|0|0|0|0|0
1403|Caro Diario (Dear Diary) (1994)|01-Jan-1994||http://us.imdb.com/M/title-exact?Caro%20diario%20(1994)|0|0|0|0|0|1|0|0|1|0|0|0|0|0|0|0|0|0|0
1404|Withnail and I (1987)|01-Jan-1987||http://us.imdb.com/M/title-exact?Withnail%20and%20I%20(1987)|0|0|0|0|0|1|0|0|0|0|0|0|0|0|0|0|0|0|0
1405|Boy's Life 2 (1997)|07-Mar-1997||http://us.imdb.com/M/title-exact?Boy%27s%20Life%202%20(1997)|0|0|0|0|0|0|0|0|1|0|0|0|0|0|0|0|0|0|0
1406|When Night Is Falling (1995)|01-Jan-1995||http://us.imdb.com/M/title-exact?When%20Night%20is%20Falling%20(1995)|0|0|0|0|0|0|0|0|1|0|0|0|0|0|1|0|0|0|0
1407|Specialist, The (1994)|01-Jan-1994||http://us.imdb.com/M/title-exact?Specialist,%20The%20(1994)|0|1|0|0|0|0|0|0|0|0|0|0|0|0|0|0|0|0|0
1408|Gordy (1995)|01-Jan-1995||http://us.imdb.com/M/title-exact?Gordy%20(1995)|0|0|0|0|0|1|0|0|0|0|0|0|0|0|0|0|0|0|0
1409|Swan Princess, The (1994)|01-Jan-1994||http://us.imdb.com/M/title-exact?Swan%20Princess,%20The%20(1994)|0|0|0|1|1|0|0|0|0|0|0|0|0|0|0|0|0|0|0
1410|Harlem (1993)|01-Jan-1993||http://us.imdb.com/M/title-exact?Harlem%20(1993)|0|0|0|0|0|0|0|0|1|0|0|0|0|0|0|0|0|0|0
1411|Barbarella (1968)|01-Jan-1968||http://us.imdb.com/M/title-exact?Barbarella%20(1968)|0|0|1|0|0|0|0|0|0|0|0|0|0|0|0|1|0|0|0
1412|Land Before Time III: The Time of the Great Giving (1995) (V)|01-Jan-1995||http://us.imdb.com/M/title-exact?Land%20Before%20Time%20III%3A%20The%20Time%20of%20the%20Great%20Giving%20%281995%29%20%28V%29|0|0|0|1|1|0|0|0|0|0|0|0|0|0|0|0|0|0|0
1413|Street Fighter (1994)|01-Jan-1994||http://us.imdb.com/M/title-exact?Street%20Fighter%20(1994)|0|1|0|0|0|0|0|0|0|0|0|0|0|0|0|0|0|0|0
1414|Coldblooded (1995)|01-Jan-1995||http://us.imdb.com/M/title-exact?Coldblooded%20(1995)|0|1|0|0|0|0|0|0|0|0|0|0|0|0|0|0|0|0|0
1415|Next Karate Kid, The (1994)|01-Jan-1994||http://us.imdb.com/M/title-exact?Next%20Karate%20Kid,%20The%20(1994)|0|1|0|0|1|0|0|0|0|0|0|0|0|0|0|0|0|0|0
1416|No Escape (1994)|01-Jan-1994||http://us.imdb.com/M/title-exact?No%20Escape%20(1994)|0|1|0|0|0|0|0|0|0|0|0|0|0|0|0|1|0|0|0
1417|Turning, The (1992)|02-May-1997||http://us.imdb.com/M/title-exact?Turning%2C%20The%20%281992%29|0|0|0|0|0|0|0|0|1|0|0|0|0|0|0|0|0|0|0
1418|Joy Luck Club, The (1993)|01-Jan-1993||http://us.imdb.com/M/title-exact?Joy+Luck+Club%2C+The+(1993)|0|0|0|0|0|0|0|0|1|0|0|0|0|0|0|0|0|0|0
1419|Highlander III: The Sorcerer (1994)|01-Jan-1994||http://us.imdb.com/M/title-exact?Highlander%20III:%20The%20Sorcerer%20(1994)|0|1|0|0|0|0|0|0|0|0|0|0|0|0|0|1|0|0|0
1420|Gilligan's Island: The Movie (1998)|01-Jan-1997||http://us.imdb.com/M/title-exact?imdb-title-119195|0|0|0|0|0|1|0|0|0|0|0|0|0|0|0|0|0|0|0
1421|My Crazy Life (Mi vida loca) (1993)|01-Jan-1993||http://us.imdb.com/M/title-exact?Mi%20vida%20loca%20(1993)|0|0|0|0|0|0|0|0|1|0|0|0|0|0|0|0|0|0|0
1422|Suture (1993)|01-Jan-1993||http://us.imdb.com/M/title-exact?Suture%20(1993)|0|0|0|0|0|0|0|0|0|0|1|0|0|0|0|0|1|0|0
1423|Walking Dead, The (1995)|01-Jan-1995||http://us.imdb.com/M/title-exact?Walking%20Dead,%20The%20(1995)|0|0|0|0|0|0|0|0|1|0|0|0|0|0|0|0|0|1|0
1424|I Like It Like That (1994)|01-Jan-1994||http://us.imdb.com/M/title-exact?I%20Like%20It%20Like%20That%20(1994)|0|0|0|0|0|1|0|0|1|0|0|0|0|0|1|0|0|0|0
1425|I'll Do Anything (1994)|01-Jan-1994||http://us.imdb.com/M/title-exact?I'll%20Do%20Anything%20(1994)|0|0|0|0|0|1|0|0|1|0|0|0|0|0|0|0|0|0|0
1426|Grace of My Heart (1996)|13-Sep-1996||http://us.imdb.com/M/title-exact?Grace%20of%20My%20Heart%20(1996)|0|0|0|0|0|1|0|0|1|0|0|0|0|0|0|0|0|0|0
1427|Drunks (1995)|01-Nov-1996||http://us.imdb.com/M/title-exact?Drunks%20(1995)|0|0|0|0|0|0|0|0|1|0|0|0|0|0|0|0|0|0|0
1428|SubUrbia (1997)|07-Feb-1997||http://us.imdb.com/M/title-exact?SubUrbia%20(1997)|0|0|0|0|0|1|0|0|0|0|0|0|0|0|0|0|0|0|0
1429|Sliding Doors (1998)|01-Jan-1998||http://us.imdb.com/Title?Sliding+Doors+(1998)|0|0|0|0|0|0|0|0|1|0|0|0|0|0|1|0|0|0|0
1430|Ill Gotten Gains (1997)|01-Jan-1997||http://us.imdb.com/M/title-exact?imdb-title-119352|0|0|0|0|0|0|0|0|1|0|0|0|0|0|0|0|0|0|0
1431|Legal Deceit (1997)|01-Jan-1997||http://us.imdb.com/Title?Legal+Deceit+(1997)|0|0|0|0|0|0|0|0|0|0|0|0|0|0|0|0|1|0|0
1432|Mighty, The (1998)|09-Oct-1998||http://us.imdb.com/Title?Mighty,+The+(1998)|0|0|0|0|0|0|0|0|1|0|0|0|0|0|0|0|0|0|0
1433|Men of Means (1998)|01-Jan-1997||http://us.imdb.com/M/title-exact?imdb-title-119655|0|1|0|0|0|0|0|0|1|0|0|0|0|0|0|0|0|0|0
1434|Shooting Fish (1997)|16-Jan-1998||http://us.imdb.com/M/title-exact?imdb-title-120122|0|0|0|0|0|0|0|0|0|0|0|0|0|0|1|0|0|0|0
1435|Steal Big, Steal Little (1995)|01-Jan-1995||http://us.imdb.com/M/title-exact?Steal%20Big,%20Steal%20Little%20(1995)|0|0|0|0|0|1|0|0|0|0|0|0|0|0|0|0|0|0|0
1436|Mr. Jones (1993)|01-Jan-1993||http://us.imdb.com/M/title-exact?Mr.%20Jones%20(1993)|0|0|0|0|0|0|0|0|1|0|0|0|0|0|1|0|0|0|0
1437|House Party 3 (1994)|01-Jan-1994||http://us.imdb.com/M/title-exact?House%20Party%203%20(1994)|0|0|0|0|0|1|0|0|0|0|0|0|0|0|0|0|0|0|0
1438|Panther (1995)|01-Jan-1995||http://us.imdb.com/M/title-exact?Panther%20(1995)|0|0|0|0|0|0|0|0|1|0|0|0|0|0|0|0|0|0|0
1439|Jason's Lyric (1994)|01-Jan-1994||http://us.imdb.com/M/title-exact?Jason's%20Lyric%20(1994)|0|0|0|0|0|0|1|0|1|0|0|0|0|0|0|0|0|0|0
1440|Above the Rim (1994)|01-Jan-1994||http://us.imdb.com/M/title-exact?Above%20the%20Rim%20(1994)|0|0|0|0|0|0|0|0|1|0|0|0|0|0|0|0|0|0|0
1441|Moonlight and Valentino (1995)|01-Jan-1995||http://us.imdb.com/M/title-exact?Moonlight%20and%20Valentino%20(1995)|0|0|0|0|0|0|0|0|1|0|0|0|0|0|1|0|0|0|0
1442|Scarlet Letter, The (1995)|01-Jan-1995||http://us.imdb.com/M/title-exact?Scarlet%20Letter,%20The%20(1995)|0|0|0|0|0|0|0|0|1|0|0|0|0|0|0|0|0|0|0
1443|8 Seconds (1994)|01-Jan-1994||http://us.imdb.com/M/title-exact?8%20Seconds%20(1994)|0|0|0|0|0|0|0|0|1|0|0|0|0|0|0|0|0|0|0
1444|That Darn Cat! (1965)|01-Jan-1965||http://us.imdb.com/Title?That+Darn+Cat%21+(1965)|0|0|0|0|1|1|0|0|0|0|0|0|0|1|0|0|0|0|0
1445|Ladybird Ladybird (1994)|01-Jan-1994||http://us.imdb.com/M/title-exact?Ladybird%20Ladybird%20(1994)|0|0|0|0|0|0|0|0|1|0|0|0|0|0|0|0|0|0|0
1446|Bye Bye, Love (1995)|01-Jan-1995||http://us.imdb.com/M/title-exact?Bye%20Bye,%20Love%20(1995)|0|0|0|0|0|1|0|0|0|0|0|0|0|0|0|0|0|0|0
1447|Century (1993)|01-Jan-1993||http://us.imdb.com/M/title-exact?Century%20(1993)|0|0|0|0|0|0|0|0|1|0|0|0|0|0|0|0|0|0|0
1448|My Favorite Season (1993)|19-Apr-1996||http://us.imdb.com/Title?Ma+saison+pr%E9f%E9r%E9e+(1993)|0|0|0|0|0|0|0|0|1|0|0|0|0|0|0|0|0|0|0
1449|Pather Panchali (1955)|22-Mar-1996||http://us.imdb.com/M/title-exact?Pather%20Panchali%20(1955)|0|0|0|0|0|0|0|0|1|0|0|0|0|0|0|0|0|0|0
1450|Golden Earrings (1947)|01-Jan-1947||http://us.imdb.com/M/title-exact?Golden%20Earrings%20%281947%29|0|0|1|0|0|0|0|0|0|0|0|0|0|0|1|0|0|0|0
1451|Foreign Correspondent (1940)|01-Jan-1940||http://us.imdb.com/M/title-exact?Foreign%20Correspondent%20(1940)|0|0|0|0|0|0|0|0|0|0|0|0|0|0|0|0|1|0|0
1452|Lady of Burlesque (1943)|01-Jan-1943||http://us.imdb.com/M/title-exact?Lady%20of%20Burlesque%20(1943)|0|0|0|0|0|1|0|0|0|0|0|0|0|1|0|0|0|0|0
1453|Angel on My Shoulder (1946)|01-Jan-1946||http://us.imdb.com/M/title-exact?Angel%20on%20My%20Shoulder%20(1946)|0|0|0|0|0|0|1|0|1|0|0|0|0|0|0|0|0|0|0
1454|Angel and the Badman (1947)|01-Jan-1947||http://us.imdb.com/M/title-exact?Angel%20and%20the%20Badman%20(1947)|0|0|0|0|0|0|0|0|0|0|0|0|0|0|0|0|0|0|1
1455|Outlaw, The (1943)|01-Jan-1943||http://us.imdb.com/M/title-exact?Outlaw,%20The%20(1943)|0|0|0|0|0|0|0|0|0|0|0|0|0|0|0|0|0|0|1
1456|Beat the Devil (1954)|01-Jan-1954||http://us.imdb.com/M/title-exact?Beat%20the%20Devil%20(1954)|0|0|0|0|0|1|0|0|1|0|0|0|0|0|0|0|0|0|0
1457|Love Is All There Is (1996)|11-Oct-1996||http://us.imdb.com/M/title-exact?Love%20Is%20All%20There%20Is%20(1996)|0|0|0|0|0|1|0|0|1|0|0|0|0|0|0|0|0|0|0
1458|Damsel in Distress, A (1937)|01-Jan-1937||http://us.imdb.com/M/title-exact?Damsel%20in%20Distress,%20A%20(1937)|0|0|0|0|0|1|0|0|0|0|0|0|1|0|1|0|0|0|0
1459|Madame Butterfly (1995)|20-Sep-1996||http://us.imdb.com/M/title-exact?Madame%20Butterfly%20(1995)|0|0|0|0|0|0|0|0|0|0|0|0|1|0|0|0|0|0|0
1460|Sleepover (1995)|25-Oct-1996||http://us.imdb.com/M/title-exact?Sleepover%20(1995)|0|0|0|0|0|1|0|0|1|0|0|0|0|0|0|0|0|0|0
1461|Here Comes Cookie (1935)|01-Jan-1935||http://us.imdb.com/M/title-exact?Here%20Comes%20Cookie%20(1935)|0|0|0|0|0|1|0|0|0|0|0|0|0|0|0|0|0|0|0
1462|Thieves (Voleurs, Les) (1996)|25-Dec-1996||http://us.imdb.com/M/title-exact?Voleurs,%20Les%20(1996)|0|0|0|0|0|0|1|0|1|0|0|0|0|0|1|0|0|0|0
1463|Boys, Les (1997)|01-Jan-1997||http://us.imdb.com/M/title-exact?imdb-title-118764|0|0|0|0|0|1|0|0|0|0|0|0|0|0|0|0|0|0|0
1464|Stars Fell on Henrietta, The (1995)|01-Jan-1995||http://us.imdb.com/Title?Stars+Fell+on+Henrietta,+The+(1995)|0|0|0|0|0|0|0|0|1|0|0|0|0|0|0|0|0|0|0
1465|Last Summer in the Hamptons (1995)|01-Jan-1995||http://us.imdb.com/M/title-exact?Last%20Summer%20in%20the%20Hamptons%20(1995)|0|0|0|0|0|1|0|0|1|0|0|0|0|0|0|0|0|0|0
1466|Margaret's Museum (1995)|01-Jan-1995||http://us.imdb.com/M/title-exact?Margaret's%20Museum%20(1995)|0|0|0|0|0|0|0|0|1|0|0|0|0|0|0|0|0|0|0
1467|Saint of Fort Washington, The (1993)|01-Jan-1993||http://us.imdb.com/M/title-exact?Saint%20of%20Fort%20Washington,%20The%20(1993)|0|0|0|0|0|0|0|0|1|0|0|0|0|0|0|0|0|0|0
1468|Cure, The (1995)|01-Jan-1995||http://us.imdb.com/M/title-exact?Cure,%20The%20(1995)|0|0|0|0|0|0|0|0|1|0|0|0|0|0|0|0|0|0|0
1469|Tom and Huck (1995)|01-Jan-1995||http://us.imdb.com/M/title-exact?Tom%20and%20Huck%20(1995)|0|0|1|0|1|0|0|0|0|0|0|0|0|0|0|0|0|0|0
1470|Gumby: The Movie (1995)|01-Jan-1995||http://us.imdb.com/M/title-exact?Gumby:%20The%20Movie%20(1995)|0|0|0|1|1|0|0|0|0|0|0|0|0|0|0|0|0|0|0
1471|Hideaway (1995)|01-Jan-1995||http://us.imdb.com/M/title-exact?Hideaway%20(1995)|0|0|0|0|0|0|0|0|0|0|0|0|0|0|0|0|1|0|0
1472|Visitors, The (Visiteurs, Les) (1993)|19-Jul-1996||http://us.imdb.com/M/title-exact?Visiteurs,%20Les%20(1993)|0|0|0|0|0|1|0|0|0|0|0|0|0|0|0|1|0|0|0
1473|Little Princess, The (1939)|01-Jan-1939||http://us.imdb.com/M/title-exact?Little%20Princess,%20The%20(1939)|0|0|0|0|1|0|0|0|1|0|0|0|0|0|0|0|0|0|0
1474|Nina Takes a Lover (1994)|01-Jan-1994||http://us.imdb.com/M/title-exact?Nina%20Takes%20a%20Lover%20(1994)|0|0|0|0|0|1|0|0|0|0|0|0|0|0|1|0|0|0|0
1475|Bhaji on the Beach (1993)|01-Jan-1993||http://us.imdb.com/M/title-exact?Bhaji%20on%20the%20Beach%20(1993)|0|0|0|0|0|1|0|0|1|0|0|0|0|0|0|0|0|0|0
1476|Raw Deal (1948)|01-Jan-1948||http://us.imdb.com/M/title-exact?Raw%20Deal%20(1948)|0|0|0|0|0|0|0|0|0|0|1|0|0|0|0|0|0|0|0
1477|Nightwatch (1997)|22-Apr-1997||http://us.imdb.com/M/title-exact?Nightwatch%20(1997)|0|0|0|0|0|0|0|0|0|0|0|1|0|0|0|0|1|0|0
1478|Dead Presidents (1995)|01-Jan-1995||http://us.imdb.com/M/title-exact?Dead%20Presidents%20(1995)|0|1|0|0|0|0|1|0|1|0|0|0|0|0|0|0|0|0|0
1479|Reckless (1995)|01-Jan-1995||http://us.imdb.com/Title?Reckless+(1995/I)|0|0|0|0|0|1|0|0|0|0|0|0|0|0|0|0|0|0|0
1480|Herbie Rides Again (1974)|01-Jan-1974||http://us.imdb.com/M/title-exact?Herbie%20Rides%20Again%20(1974)|0|0|1|0|1|1|0|0|0|0|0|0|0|0|0|0|0|0|0
1481|S.F.W. (1994)|01-Jan-1994||http://us.imdb.com/M/title-exact?S.F.W.%20(1994)|0|0|0|0|0|0|0|0|1|0|0|0|0|0|0|0|0|0|0
1482|Gate of Heavenly Peace, The (1995)|10-May-1996||http://us.imdb.com/M/title-exact?Gate%20of%20Heavenly%20Peace,%20The%20(1995)|0|0|0|0|0|0|0|1|0|0|0|0|0|0|0|0|0|0|0
1483|Man in the Iron Mask, The (1998)|17-Mar-1998||http://us.imdb.com/Title?Man+in+the+Iron+Mask,+The+(1998/I)|0|1|0|0|0|0|0|0|1|0|0|0|0|0|1|0|0|0|0
1484|Jerky Boys, The (1994)|01-Jan-1994||http://us.imdb.com/M/title-exact?Jerky%20Boys,%20The%20(1994)|0|1|0|0|0|1|0|0|0|0|0|0|0|0|0|0|0|0|0
1485|Colonel Chabert, Le (1994)|01-Jan-1994||http://us.imdb.com/M/title-exact?Colonel%20Chabert,%20Le%20(1994)|0|0|0|0|0|0|0|0|1|0|0|0|0|0|1|0|0|1|0
1486|Girl in the Cadillac (1995)|01-Jan-1995||http://us.imdb.com/M/title-exact?Girl%20in%20the%20Cadillac%20(1995)|0|0|0|0|0|0|0|0|1|0|0|0|0|0|0|0|0|0|0
1487|Even Cowgirls Get the Blues (1993)|01-Jan-1993||http://us.imdb.com/M/title-exact?Even%20Cowgirls%20Get%20the%20Blues%20(1993)|0|0|0|0|0|1|0|0|0|0|0|0|0|0|1|0|0|0|0
1488|Germinal (1993)|01-Jan-1993||http://us.imdb.com/M/title-exact?Germinal%20(1993)|0|0|0|0|0|0|0|0|1|0|0|0|0|0|0|0|0|0|0
1489|Chasers (1994)|01-Jan-1994||http://us.imdb.com/M/title-exact?Chasers%20(1994)|0|0|0|0|0|1|0|0|0|0|0|0|0|0|0|0|0|0|0
1490|Fausto (1993)|01-Jan-1993||http://us.imdb.com/M/title-exact?Fausto%20%281993%29|0|0|0|0|0|1|0|0|0|0|0|0|0|0|0|0|0|0|0
1491|Tough and Deadly (1995)|01-Jan-1995||http://us.imdb.com/M/title-exact?Tough%20and%20Deadly%20(1995)|0|1|0|0|0|0|0|0|1|0|0|0|0|0|0|0|1|0|0
1492|Window to Paris (1994)|01-Jan-1994||http://us.imdb.com/Title?Okno+v+Parizh+(1994)|0|0|0|0|0|1|0|0|0|0|0|0|0|0|0|0|0|0|0
1493|Modern Affair, A (1995)|06-Sep-1996||http://us.imdb.com/M/title-exact?Modern%20Affair,%20A%20(1995)|0|0|0|0|0|0|0|0|0|0|0|0|0|0|1|0|0|0|0
1494|Mostro, Il (1994)|19-Apr-1996||http://us.imdb.com/M/title-exact?Mostro,%20Il%20(1994)|0|0|0|0|0|1|0|0|0|0|0|0|0|0|0|0|0|0|0
1495|Flirt (1995)|07-Aug-1996||http://us.imdb.com/Title?Flirt+(1995/I)|0|0|0|0|0|0|0|0|1|0|0|0|0|0|0|0|0|0|0
1496|Carpool (1996)|23-Aug-1996||http://us.imdb.com/M/title-exact?Carpool%20(1996)|0|0|0|0|0|1|1|0|0|0|0|0|0|0|0|0|0|0|0
1497|Line King: Al Hirschfeld, The (1996)|11-Oct-1996||http://us.imdb.com/M/title-exact?Line%20King,%20The%20(1996)|0|0|0|0|0|0|0|1|0|0|0|0|0|0|0|0|0|0|0
1498|Farmer & Chase (1995)|10-Jan-1997||http://us.imdb.com/M/title-exact?Farmer%20&%20Chase%20(1995)|0|0|0|0|0|1|0|0|0|0|0|0|0|0|0|0|0|0|0
1499|Grosse Fatigue (1994)|01-Jan-1994||http://us.imdb.com/M/title-exact?Grosse%20fatigue%20(1994)|0|0|0|0|0|1|0|0|0|0|0|0|0|0|0|0|0|0|0
1500|Santa with Muscles (1996)|08-Nov-1996||http://us.imdb.com/M/title-exact?Santa%20with%20Muscles%20(1996)|0|0|0|0|0|1|0|0|0|0|0|0|0|0|0|0|0|0|0
1501|Prisoner of the Mountains (Kavkazsky Plennik) (1996)|31-Jan-1997||http://us.imdb.com/M/title-exact?Kavkazsky%20Plennik%20(1996)|0|0|0|0|0|0|0|0|0|0|0|0|0|0|0|0|0|1|0
1502|Naked in New York (1994)|01-Jan-1994||http://us.imdb.com/Title?Naked+in+New+York+(1994)|0|0|0|0|0|1|0|0|0|0|0|0|0|0|1|0|0|0|0
1503|Gold Diggers: The Secret of Bear Mountain (1995)|01-Jan-1995||http://us.imdb.com/M/title-exact?Gold%20Diggers:%20The%20Secret%20of%20Bear%20Mountain%20(1995)|0|0|1|0|1|0|0|0|0|0|0|0|0|0|0|0|0|0|0
1504|Bewegte Mann, Der (1994)|12-Jul-1996||http://us.imdb.com/M/title-exact?Bewegte%20Mann%2C%20Der%20%281994%29|0|0|0|0|0|1|0|0|0|0|0|0|0|0|0|0|0|0|0
1505|Killer: A Journal of Murder (1995)|06-Sep-1996||http://us.imdb.com/M/title-exact?Killer:%20A%20Journal%20of%20Murder%20(1995)|0|0|0|0|0|0|1|0|1|0|0|0|0|0|0|0|0|0|0
1506|Nelly & Monsieur Arnaud (1995)|12-Apr-1996||http://us.imdb.com/M/title-exact?Nelly%20%26%20Monsieur%20Arnaud%20%281995%29|0|0|0|0|0|0|0|0|1|0|0|0|0|0|0|0|0|0|0
1507|Three Lives and Only One Death (1996)|11-Oct-1996||http://us.imdb.com/M/title-exact?Trois%20vies%20et%20une%20seule%20mort%20(1996)|0|0|0|0|0|1|0|0|0|0|0|0|0|0|0|0|0|0|0
1508|Babysitter, The (1995)|01-Jan-1995||http://us.imdb.com/M/title-exact?Babysitter,%20The%20(1995)|0|0|0|0|0|0|0|0|1|0|0|0|0|0|0|0|1|0|0
1509|Getting Even with Dad (1994)|01-Jan-1994||http://us.imdb.com/M/title-exact?Getting%20Even%20with%20Dad%20(1994)|0|0|0|0|0|1|0|0|0|0|0|0|0|0|0|0|0|0|0
1510|Mad Dog Time (1996)|08-Nov-1996||http://us.imdb.com/M/title-exact?Mad%20Dog%20Time%20(1996)|0|0|0|0|0|0|1|0|0|0|0|0|0|0|0|0|0|0|0
1511|Children of the Revolution (1996)|01-May-1997||http://us.imdb.com/M/title-exact?Children%20of%20the%20Revolution%20%281996%29|0|0|0|0|0|1|0|0|0|0|0|0|0|0|0|0|0|0|0
1512|World of Apu, The (Apur Sansar) (1959)|05-Apr-1996||http://us.imdb.com/M/title-exact?Apur%20Sansar%20(1959)|0|0|0|0|0|0|0|0|1|0|0|0|0|0|0|0|0|0|0
1513|Sprung (1997)|14-May-1997||http://us.imdb.com/M/title-exact?Sprung%20%281997%29|0|0|0|0|0|1|0|0|0|0|0|0|0|0|0|0|0|0|0
1514|Dream With the Fishes (1997)|20-Jun-1997||http://us.imdb.com/M/title-exact?Dream+With+the+Fishes+(1997)|0|0|0|0|0|0|0|0|1|0|0|0|0|0|0|0|0|0|0
1515|Wings of Courage (1995)|01-Jan-1995||http://us.imdb.com/M/title-exact?Wings%20of%20Courage%20(1995)|0|0|1|0|0|0|0|0|0|0|0|0|0|0|1|0|0|0|0
1516|Wedding Gift, The (1994)|01-Jan-1994||http://us.imdb.com/M/title-exact?Wedding%20Gift,%20The%20(1994)%20(TV)|0|0|0|0|0|0|0|0|1|0|0|0|0|0|0|0|0|0|0
1517|Race the Sun (1996)|01-Jan-1996||http://us.imdb.com/M/title-exact?Race%20the%20Sun%20(1996)|0|0|0|0|0|0|0|0|1|0|0|0|0|0|0|0|0|0|0
1518|Losing Isaiah (1995)|01-Jan-1995||http://us.imdb.com/M/title-exact?Losing%20Isaiah%20(1995)|0|0|0|0|0|0|0|0|1|0|0|0|0|0|0|0|0|0|0
1519|New Jersey Drive (1995)|01-Jan-1995||http://us.imdb.com/M/title-exact?New%20Jersey%20Drive%20(1995)|0|0|0|0|0|0|1|0|1|0|0|0|0|0|0|0|0|0|0
1520|Fear, The (1995)|01-Jan-1995||http://us.imdb.com/M/title-exact?Fear,%20The%20(1995)|0|0|0|0|0|0|0|0|0|0|0|1|0|0|0|0|0|0|0
1521|Mr. Wonderful (1993)|01-Jan-1993||http://us.imdb.com/M/title-exact?Mr.%20Wonderful%20(1993)|0|0|0|0|0|1|0|0|0|0|0|0|0|0|1|0|0|0|0
1522|Trial by Jury (1994)|01-Jan-1994||http://us.imdb.com/M/title-exact?Trial%20by%20Jury%20(1994)|0|0|0|0|0|0|0|0|0|0|0|0|0|0|0|0|1|0|0
1523|Good Man in Africa, A (1994)|01-Jan-1994||http://us.imdb.com/M/title-exact?Good%20Man%20in%20Africa,%20A%20(1994)|0|1|1|0|0|0|0|0|0|0|0|0|0|0|0|0|0|0|0
1524|Kaspar Hauser (1993)|07-Jun-1996||http://us.imdb.com/Title?Kaspar+Hauser+(1993)|0|0|0|0|0|0|0|0|1|0|0|0|0|0|0|0|0|0|0
1525|Object of My Affection, The (1998)|20-Mar-1998||http://us.imdb.com/Title?Object+of+My+Affection,+The+(1998)|0|0|0|0|0|1|0|0|0|0|0|0|0|0|1|0|0|0|0
1526|Witness (1985)|01-Jan-1985||http://us.imdb.com/M/title-exact?Witness+(1985)|0|0|0|0|0|0|0|0|1|0|0|0|0|0|1|0|1|0|0
1527|Senseless (1998)|09-Jan-1998||http://us.imdb.com/M/title-exact?imdb-title-120820|0|0|0|0|0|1|0|0|0|0|0|0|0|0|0|0|0|0|0
1528|Nowhere (1997)|09-May-1997||http://us.imdb.com/M/title-exact?Nowhere%20%281997%29|0|0|0|0|0|0|0|0|1|0|0|0|0|0|0|0|0|0|0
1529|Underground (1995)|29-Mar-1996||http://us.imdb.com/M/title-exact?Underground%20(1995)|0|0|0|0|0|0|0|0|0|0|0|0|0|0|0|0|0|1|0
1530|Jefferson in Paris (1995)|01-Jan-1995||http://us.imdb.com/M/title-exact?Jefferson%20in%20Paris%20(1995)|0|0|0|0|0|0|0|0|1|0|0|0|0|0|0|0|0|0|0
1531|Far From Home: The Adventures of Yellow Dog (1995)|01-Jan-1995||http://us.imdb.com/M/title-exact?Far%20From%20Home:%20The%20Adventures%20of%20Yellow%20Dog%20(1995)|0|0|1|0|1|0|0|0|0|0|0|0|0|0|0|0|0|0|0
1532|Foreign Student (1994)|01-Jan-1994||http://us.imdb.com/M/title-exact?Foreign%20Student%20(1994)|0|0|0|0|0|0|0|0|1|0|0|0|0|0|0|0|0|0|0
1533|I Don't Want to Talk About It (De eso no se habla) (1993)|01-Jan-1993||http://us.imdb.com/M/title-exact?De%20Eso%20No%20Se%20Habla%20(1993)|0|0|0|0|0|0|0|0|1|0|0|0|0|0|0|0|0|0|0
1534|Twin Town (1997)|30-May-1997||http://us.imdb.com/M/title-exact?Twin%20Town%20%281997%29|0|0|0|0|0|1|1|0|0|0|0|0|0|0|0|0|0|0|0
1535|Enfer, L' (1994)|01-Jan-1994||http://us.imdb.com/M/title-exact?Enfer,%20L'%20(1994)|0|0|0|0|0|0|0|0|1|0|0|0|0|0|0|0|0|0|0
1536|Aiqing wansui (1994)|22-Jul-1996||http://us.imdb.com/M/title-exact?Aiqing%20Wansui%20(1994)|0|0|0|0|0|0|0|0|1|0|0|0|0|0|0|0|0|0|0
1537|Cosi (1996)|11-Apr-1997||http://us.imdb.com/M/title-exact?Cosi%20(1996)|0|0|0|0|0|1|0|0|0|0|0|0|0|0|0|0|0|0|0
1538|All Over Me (1997)|25-Apr-1997||http://us.imdb.com/M/title-exact?All%20Over%20Me%20%281997%29|0|0|0|0|0|0|0|0|1|0|0|0|0|0|0|0|0|0|0
1539|Being Human (1993)|01-Jan-1993||http://us.imdb.com/M/title-exact?Being%20Human%20(1993)|0|0|0|0|0|0|0|0|1|0|0|0|0|0|0|0|0|0|0
1540|Amazing Panda Adventure, The (1995)|01-Jan-1995||http://us.imdb.com/M/title-exact?Amazing%20Panda%20Adventure,%20The%20(1995)|0|0|1|0|1|0|0|0|0|0|0|0|0|0|0|0|0|0|0
1541|Beans of Egypt, Maine, The (1994)|01-Jan-1994||http://us.imdb.com/M/title-exact?Beans%20of%20Egypt,%20Maine,%20The%20(1994)|0|0|0|0|0|0|0|0|1|0|0|0|0|0|0|0|0|0|0
1542|Scarlet Letter, The (1926)|01-Jan-1926||http://us.imdb.com/M/title-exact?Scarlet%20Letter,%20The%20(1926)|0|0|0|0|0|0|0|0|1|0|0|0|0|0|0|0|0|0|0
1543|Johns (1996)|18-Oct-1996||http://us.imdb.com/M/title-exact?Johns%20(1996)|0|0|0|0|0|0|0|0|1|0|0|0|0|0|0|0|0|0|0
1544|It Takes Two (1995)|01-Jan-1995||http://us.imdb.com/M/title-exact?It%20Takes%20Two%20(1995)|0|0|0|0|0|1|0|0|0|0|0|0|0|0|0|0|0|0|0
1545|Frankie Starlight (1995)|01-Jan-1995||http://us.imdb.com/M/title-exact?Frankie%20Starlight%20(1995)|0|0|0|0|0|0|0|0|1|0|0|0|0|0|1|0|0|0|0
1546|Shadows (Cienie) (1988)|01-Jan-1988||http://us.imdb.com/M/title-exact?Cienie%20(1988)|0|0|0|0|0|0|0|0|1|0|0|0|0|0|0|0|0|0|0
1547|Show, The (1995)|01-Jan-1995||http://us.imdb.com/M/title-exact?Show,%20The%20(1995)|0|0|0|0|0|0|0|1|0|0|0|0|0|0|0|0|0|0|0
1548|The Courtyard (1995)|01-Jan-1995||http://us.imdb.com/M/title-exact?Courtyard,%20The%20(1995)%20(TV)|0|1|0|0|0|0|0|0|0|0|0|0|0|0|0|0|1|0|0
1549|Dream Man (1995)|01-Jan-1995||http://us.imdb.com/M/title-exact?Dream%20Man%20(1995)|0|0|0|0|0|0|0|0|0|0|0|0|0|0|0|0|1|0|0
1550|Destiny Turns on the Radio (1995)|01-Jan-1995||http://us.imdb.com/M/title-exact?Destiny%20Turns%20on%20the%20Radio%20(1995)|0|0|0|0|0|1|0|0|0|0|0|0|0|0|0|0|0|0|0
1551|Glass Shield, The (1994)|01-Jan-1994||http://us.imdb.com/M/title-exact?Glass%20Shield,%20The%20(1994)|0|0|0|0|0|0|0|0|1|0|0|0|0|0|0|0|0|0|0
1552|Hunted, The (1995)|01-Jan-1995||http://us.imdb.com/M/title-exact?Hunted,%20The%20(1995)|0|1|0|0|0|0|0|0|0|0|0|0|0|0|0|0|0|0|0
1553|Underneath, The (1995)|01-Jan-1995||http://us.imdb.com/M/title-exact?Underneath,%20The%20(1995)|0|0|0|0|0|0|0|0|0|0|0|0|0|1|0|0|1|0|0
1554|Safe Passage (1994)|01-Jan-1994||http://us.imdb.com/M/title-exact?Safe%20Passage%20(1994)|0|0|0|0|0|0|0|0|1|0|0|0|0|0|0|0|0|0|0
1555|Secret Adventures of Tom Thumb, The (1993)|01-Jan-1993||http://us.imdb.com/M/title-exact?Secret%20Adventures%20of%20Tom%20Thumb,%20The%20(1993)|0|0|1|0|1|0|0|0|0|0|0|0|0|0|0|0|0|0|0
1556|Condition Red (1995)|01-Jan-1995||http://us.imdb.com/M/title-exact?Condition%20Red%20(1995)|0|1|0|0|0|0|0|0|1|0|0|0|0|0|0|0|1|0|0
1557|Yankee Zulu (1994)|16-Feb-1996||http://us.imdb.com/M/title-exact?Yankee%20Zulu%20(1994)|0|0|0|0|0|1|0|0|1|0|0|0|0|0|0|0|0|0|0
1558|Aparajito (1956)|29-Mar-1996||http://us.imdb.com/M/title-exact?Aparajito%20(1956)|0|0|0|0|0|0|0|0|1|0|0|0|0|0|0|0|0|0|0
1559|Hostile Intentions (1994)|01-Jan-1994||http://us.imdb.com/M/title-exact?Hostile%20Intentions%20(1994)|0|1|0|0|0|0|0|0|1|0|0|0|0|0|0|0|1|0|0
1560|Clean Slate (Coup de Torchon) (1981)|01-Jan-1981||http://us.imdb.com/M/title-exact?Coup%20de%20torchon%20(1981)|0|0|0|0|0|0|1|0|0|0|0|0|0|0|0|0|0|0|0
1561|Tigrero: A Film That Was Never Made (1994)|01-Jan-1994||http://us.imdb.com/M/title-exact?Tigrero:%20A%20Film%20That%20Was%20Never%20Made%20(1994)|0|0|0|0|0|0|0|1|1|0|0|0|0|0|0|0|0|0|0
1562|Eye of Vichy, The (Oeil de Vichy, L') (1993)|01-Jan-1993||http://us.imdb.com/M/title-exact?Oeil%20de%20Vichy,%20L'%20(1993)|0|0|0|0|0|0|0|1|0|0|0|0|0|0|0|0|0|0|0
1563|Promise, The (Versprechen, Das) (1994)|01-Jan-1994||http://us.imdb.com/M/title-exact?Versprechen,%20Das%20(1994)|0|0|0|0|0|0|0|0|0|0|0|0|0|0|1|0|0|0|0
1564|To Cross the Rubicon (1991)|01-Jan-1991||http://us.imdb.com/M/title-exact?To%20Cross%20the%20Rubicon%20(1991)|0|0|0|0|0|0|0|0|1|0|0|0|0|0|0|0|0|0|0
1565|Daens (1992)|01-Jan-1992||http://us.imdb.com/M/title-exact?Daens%20(1992)|0|0|0|0|0|0|0|0|1|0|0|0|0|0|0|0|0|0|0
1566|Man from Down Under, The (1943)|01-Jan-1943||http://us.imdb.com/Title?Man+from+Down+Under,+The+(1943)|0|0|0|0|0|0|0|0|1|0|0|0|0|0|0|0|0|0|0
1567|Careful (1992)|01-Jan-1992||http://us.imdb.com/M/title-exact?Careful%20(1992)|0|0|0|0|0|1|0|0|0|0|0|0|0|0|0|0|0|0|0
1568|Vermont Is For Lovers (1992)|01-Jan-1992||http://us.imdb.com/M/title-exact?Vermont%20Is%20For%20Lovers%20(1992)|0|0|0|0|0|1|0|0|0|0|0|0|0|0|1|0|0|0|0
1569|Vie est belle, La (Life is Rosey) (1987)|01-Jan-1987||http://us.imdb.com/M/title-exact?Vie%20est%20belle,%20La%20(1987)|0|0|0|0|0|1|0|0|1|0|0|0|0|0|0|0|0|0|0
1570|Quartier Mozart (1992)|01-Jan-1992||http://us.imdb.com/M/title-exact?Quartier%20Mozart%20(1992)|0|0|0|0|0|1|0|0|0|0|0|0|0|0|0|0|0|0|0
1571|Touki Bouki (Journey of the Hyena) (1973)|01-Jan-1973||http://us.imdb.com/M/title-exact?Touki%20Bouki%20(1973)|0|0|0|0|0|0|0|0|1|0|0|0|0|0|0|0|0|0|0
1572|Wend Kuuni (God's Gift) (1982)|01-Jan-1982||http://us.imdb.com/M/title-exact?Wend%20Kuuni%20(1982)|0|0|0|0|0|0|0|0|1|0|0|0|0|0|0|0|0|0|0
1573|Spirits of the Dead (Tre passi nel delirio) (1968)|01-Jan-1968||http://us.imdb.com/M/title-exact?Tre%20passi%20nel%20delirio%20(1968)|0|0|0|0|0|0|0|0|0|0|0|1|0|0|0|0|0|0|0
1574|Pharaoh's Army (1995)|01-Jan-1995||http://us.imdb.com/M/title-exact?Pharaoh's%20Army%20(1995)|0|0|0|0|0|0|0|0|0|0|0|0|0|0|0|0|0|1|0
1575|I, Worst of All (Yo, la peor de todas) (1990)|01-Jan-1990||http://us.imdb.com/M/title-exact?Yo,%20la%20Peor%20de%20Todas%20(1990)|0|0|0|0|0|0|0|0|1|0|0|0|0|0|0|0|0|0|0
1576|Hungarian Fairy Tale, A (1987)|01-Jan-1987||http://us.imdb.com/M/title-exact?Hol%20volt,%20hol%20nem%20volt%20(1987)|0|0|0|0|0|0|0|0|0|1|0|0|0|0|0|0|0|0|0
1577|Death in the Garden (Mort en ce jardin, La) (1956)|01-Jan-1956||http://us.imdb.com/Title?Mort+en+ce+jardin,+La+(1956)|0|0|0|0|0|0|0|0|1|0|0|0|0|0|0|0|0|0|0
1578|Collectionneuse, La (1967)|01-Jan-1967||http://us.imdb.com/M/title-exact?Collectionneuse,%20La%20(1967)|0|0|0|0|0|0|0|0|1|0|0|0|0|0|0|0|0|0|0
1579|Baton Rouge (1988)|01-Jan-1988||http://us.imdb.com/Title?B%E2ton+rouge+(1988)|0|0|0|0|0|0|0|0|0|0|0|0|0|0|0|0|1|0|0
1580|Liebelei (1933)|01-Jan-1933||http://us.imdb.com/M/title-exact?Liebelei%20(1933)|0|0|0|0|0|0|0|0|0|0|0|0|0|0|1|0|0|0|0
1581|Woman in Question, The (1950)|01-Jan-1950||http://us.imdb.com/M/title-exact?Woman%20in%20Question,%20The%20(1950)|0|0|0|0|0|0|0|0|0|0|0|0|0|1|0|0|0|0|0
1582|T-Men (1947)|01-Jan-1947||http://us.imdb.com/M/title-exact?T-Men%20(1947)|0|0|0|0|0|0|0|0|0|0|1|0|0|0|0|0|0|0|0
1583|Invitation, The (Zaproszenie) (1986)|01-Jan-1986||http://us.imdb.com/M/title-exact?Zaproszenie%20(1986)|0|0|0|0|0|0|0|0|1|0|0|0|0|0|0|0|0|0|0
1584|Symphonie pastorale, La (1946)|01-Jan-1946||http://us.imdb.com/M/title-exact?Symphonie%20pastorale,%20La%20(1946)|0|0|0|0|0|0|0|0|1|0|0|0|0|0|0|0|0|0|0
1585|American Dream (1990)|01-Jan-1990||http://us.imdb.com/M/title-exact?American%20Dream%20(1990)|0|0|0|0|0|0|0|1|0|0|0|0|0|0|0|0|0|0|0
1586|Lashou shentan (1992)|01-Jan-1992||http://us.imdb.com/M/title-exact?Lashou%20Shentan%20(1992)|0|1|0|0|0|0|1|0|1|0|0|0|0|0|0|0|0|0|0
1587|Terror in a Texas Town (1958)|01-Jan-1958||http://us.imdb.com/M/title-exact?Terror%20in%20a%20Texas%20Town%20(1958)|0|0|0|0|0|0|0|0|0|0|0|0|0|0|0|0|0|0|1
1588|Salut cousin! (1996)|21-Feb-1997||http://us.imdb.com/M/title-exact?Salut%20cousin!%20(1996)|0|0|0|0|0|1|0|0|1|0|0|0|0|0|0|0|0|0|0
1589|Schizopolis (1996)|23-May-1997||http://us.imdb.com/Title?Schizopolis+(1996)|0|0|0|0|0|1|0|0|0|0|0|0|0|0|0|0|0|0|0
1590|To Have, or Not (1995)|06-Jun-1997||http://us.imdb.com/M/title-exact?En%20avoir%20%28ou%20pas%29%20%281995%29|0|0|0|0|0|0|0|0|1|0|0|0|0|0|0|0|0|0|0
1591|Duoluo tianshi (1995)|21-Jan-1998||http://us.imdb.com/M/title-exact?imdb-title-112913|0|0|0|0|0|0|0|0|1|0|0|0|0|0|0|0|0|0|0
1592|Magic Hour, The (1998)|30-Jan-1998||http://us.imdb.com/M/title-exact?imdb-title-119594|0|0|0|0|0|0|0|0|1|0|0|0|0|0|0|0|0|0|0
1593|Death in Brunswick (1991)|16-Aug-1996||http://us.imdb.com/M/title-exact?Death%20in%20Brunswick%20(1991)|0|0|0|0|0|1|0|0|0|0|0|0|0|0|0|0|0|0|0
1594|Everest (1998)|10-Mar-1998||http://us.imdb.com/Title?Everest+(1998)|0|0|0|0|0|0|0|1|0|0|0|0|0|0|0|0|0|0|0
1595|Shopping (1994)|09-Feb-1996||http://us.imdb.com/M/title-exact?Shopping%20(1994)|0|1|0|0|0|0|0|0|0|0|0|0|0|0|0|0|1|0|0
1596|Nemesis 2: Nebula (1995)|01-Jan-1995||http://us.imdb.com/M/title-exact?Nemesis%202:%20Nebula%20(1995)|0|1|0|0|0|0|0|0|0|0|0|0|0|0|0|1|1|0|0
1597|Romper Stomper (1992)|01-Jan-1992||http://us.imdb.com/M/title-exact?Romper%20Stomper%20(1992)|0|1|0|0|0|0|0|0|1|0|0|0|0|0|0|0|0|0|0
1598|City of Industry (1997)|14-Mar-1997||http://us.imdb.com/M/title-exact?City%20of%20Industry%20(1997)|0|0|0|0|0|0|1|0|0|0|0|0|0|0|0|0|1|0|0
1599|Someone Else's America (1995)|10-May-1996||http://us.imdb.com/M/title-exact?Someone%20Else's%20America%20(1995)|0|0|0|0|0|0|0|0|1|0|0|0|0|0|0|0|0|0|0
1600|Guantanamera (1994)|16-May-1997||http://us.imdb.com/M/title-exact?Guantanamera%20(1994)|0|0|0|0|0|1|0|0|0|0|0|0|0|0|0|0|0|0|0
1601|Office Killer (1997)|01-Jan-1997||http://us.imdb.com/M/title-exact?imdb-title-119819|0|0|0|0|0|0|0|0|0|0|0|0|0|0|0|0|1|0|0
1602|Price Above Rubies, A (1998)|20-Mar-1998||http://us.imdb.com/Title?Price+Above+Rubies,+A+(1998)|0|0|0|0|0|0|0|0|1|0|0|0|0|0|0|0|0|0|0
1603|Angela (1995)|16-Feb-1996||http://us.imdb.com/M/title-exact?Angela%20(1995)|0|0|0|0|0|0|0|0|1|0|0|0|0|0|0|0|0|0|0
1604|He Walked by Night (1948)|01-Jan-1948||http://us.imdb.com/M/title-exact?He%20Walked%20by%20Night%20(1948)|0|0|0|0|0|0|1|0|0|0|1|0|0|0|0|0|1|0|0
1605|Love Serenade (1996)|11-Jul-1997||http://us.imdb.com/M/title-exact?Love+Serenade+(1996)|0|0|0|0|0|1|0|0|0|0|0|0|0|0|0|0|0|0|0
1606|Deceiver (1997)|01-Jan-1997||http://us.imdb.com/M/title-exact?Liar+(1997)|0|0|0|0|0|0|1|0|0|0|0|0|0|0|0|0|0|0|0
1607|Hurricane Streets (1998)|01-Jan-1998||http://us.imdb.com/Title?Hurricane+Streets+(1998)|0|0|0|0|0|0|0|0|1|0|0|0|0|0|0|0|0|0|0
1608|Buddy (1997)|06-Jun-1997||http://us.imdb.com/M/title-exact?Buddy%20%281997%29|0|0|1|0|1|0|0|0|1|0|0|0|0|0|0|0|0|0|0
1609|B*A*P*S (1997)|28-Mar-1997||http://us.imdb.com/M/title-exact?B%2EA%2EP%2ES%2E%20(1997)|0|0|0|0|0|1|0|0|0|0|0|0|0|0|0|0|0|0|0
1610|Truth or Consequences, N.M. (1997)|02-May-1997||http://us.imdb.com/Title?Truth+or+Consequences,+N.M.+(1997)|0|1|0|0|0|0|1|0|0|0|0|0|0|0|1|0|0|0|0
1611|Intimate Relations (1996)|09-May-1997||http://us.imdb.com/M/title-exact?Intimate%20Relations%20%281996%29|0|0|0|0|0|1|0|0|0|0|0|0|0|0|0|0|0|0|0
1612|Leading Man, The (1996)|16-Jan-1998||http://us.imdb.com/M/title-exact?imdb-title-116845|0|0|0|0|0|0|0|0|0|0|0|0|0|0|1|0|0|0|0
1613|Tokyo Fist (1995)|11-Feb-1998||http://us.imdb.com/M/title-exact?Tokyo+Fist+(1995)|0|1|0|0|0|0|0|0|1|0|0|0|0|0|0|0|0|0|0
1614|Reluctant Debutante, The (1958)|01-Jan-1958||http://us.imdb.com/M/title-exact?Reluctant%20Debutante,%20The%20(1958)|0|0|0|0|0|1|0|0|1|0|0|0|0|0|0|0|0|0|0
1615|Warriors of Virtue (1997)|02-May-1997||http://us.imdb.com/M/title-exact?Warriors%20of%20Virtue%20%281997%29|0|1|1|0|1|0|0|0|0|1|0|0|0|0|0|0|0|0|0
1616|Desert Winds (1995)|01-Jan-1995||http://us.imdb.com/M/title-exact?Desert%20Winds%20(1995)|0|0|0|0|0|0|0|0|1|0|0|0|0|0|0|0|0|0|0
1617|Hugo Pool (1997)|01-Jan-1997||http://us.imdb.com/M/title-exact?Hugo+Pool+(1997)|0|0|0|0|0|0|0|0|0|0|0|0|0|0|1|0|0|0|0
1618|King of New York (1990)|01-Jan-1990||http://us.imdb.com/Title?King+of+New+York+(1990)|0|1|0|0|0|0|1|0|0|0|0|0|0|0|0|0|0|0|0
1619|All Things Fair (1996)|08-Mar-1996||http://us.imdb.com/Title?Lust+och+f%E4gring+stor+(1995)|0|0|0|0|0|0|0|0|1|0|0|0|0|0|0|0|0|0|0
1620|Sixth Man, The (1997)|28-Mar-1997||http://us.imdb.com/M/title-exact?Sixth%20Man%2C%20The%20(1997)|0|0|0|0|0|1|0|0|0|0|0|0|0|0|0|0|0|0|0
1621|Butterfly Kiss (1995)|26-Apr-1996||http://us.imdb.com/M/title-exact?Butterfly%20Kiss%20(1995)|0|0|0|0|0|0|0|0|0|0|0|0|0|0|0|0|1|0|0
1622|Paris, France (1993)|01-Jan-1993||http://us.imdb.com/M/title-exact?Paris,%20France%20(1993)|0|0|0|0|0|1|0|0|0|0|0|0|0|0|0|0|0|0|0
1623|C�r�monie, La (1995)|20-Dec-1996||http://us.imdb.com/M/title-exact?C%E9r%E9monie%2C%20La%20%281995%29|0|0|0|0|0|0|0|0|1|0|0|0|0|0|0|0|0|0|0
1624|Hush (1998)|10-Mar-1998||http://us.imdb.com/Title?Hush+(1998)|0|0|0|0|0|0|0|0|0|0|0|0|0|0|0|0|1|0|0
1625|Nightwatch (1997)|22-Apr-1997||http://us.imdb.com/M/title-exact?Nightwatch%20(1997)|0|0|0|0|0|0|0|0|0|0|0|1|0|0|0|0|1|0|0
1626|Nobody Loves Me (Keiner liebt mich) (1994)|09-Feb-1996||http://us.imdb.com/M/title-exact?Keiner%20liebt%20mich%20(1994)|0|0|0|0|0|1|0|0|1|0|0|0|0|0|0|0|0|0|0
1627|Wife, The (1995)|26-Jul-1996||http://us.imdb.com/Title?Wife,+The+(1995)|0|0|0|0|0|1|0|0|1|0|0|0|0|0|0|0|0|0|0
1628|Lamerica (1994)|01-Jan-1994||http://us.imdb.com/M/title-exact?Lamerica%20(1994)|0|0|0|0|0|0|0|0|1|0|0|0|0|0|0|0|0|0|0
1629|Nico Icon (1995)|01-Jan-1995||http://us.imdb.com/M/title-exact?Nico%20Icon%20(1995)|0|0|0|0|0|0|0|1|0|0|0|0|0|0|0|0|0|0|0
1630|Silence of the Palace, The (Saimt el Qusur) (1994)|02-Feb-1996||http://us.imdb.com/M/title-exact?Saimt%20el%20Qusur%20(1994)|0|0|0|0|0|0|0|0|1|0|0|0|0|0|0|0|0|0|0
1631|Slingshot, The (1993)|01-Jan-1993||http://us.imdb.com/Title?K%E5disbellan+(1993)|0|0|0|0|0|1|0|0|1|0|0|0|0|0|0|0|0|0|0
1632|Land and Freedom (Tierra y libertad) (1995)|29-Mar-1996||http://us.imdb.com/M/title-exact?Tierra%20y%20libertad%20(1995)|0|0|0|0|0|0|0|0|0|0|0|0|0|0|0|0|0|1|0
1633|� k�ldum klaka (Cold Fever) (1994)|08-Mar-1996||http://us.imdb.com/Title?%C1+k%F6ldum+klaka+(1994)|0|0|0|0|0|1|0|0|1|0|0|0|0|0|0|0|0|0|0
1634|Etz Hadomim Tafus (Under the Domin Tree) (1994)|19-Apr-1996||http://us.imdb.com/M/title-exact?Etz%20Hadomim%20Tafus%20(1994)|0|0|0|0|0|0|0|0|1|0|0|0|0|0|0|0|0|0|0
1635|Two Friends (1986) |26-Apr-1986||http://us.imdb.com/M/title-exact?Two%20Friends%20(1986)%20(TV)|0|0|0|0|0|0|0|0|1|0|0|0|0|0|0|0|0|0|0
1636|Brothers in Trouble (1995)|26-Apr-1996||http://us.imdb.com/M/title-exact?Brothers%20in%20Trouble%20(1995)|0|0|0|0|0|0|0|0|1|0|0|0|0|0|0|0|0|0|0
1637|Girls Town (1996)|23-Aug-1996||http://us.imdb.com/M/title-exact?Girls%20Town%20(1996)|0|0|0|0|0|0|0|0|1|0|0|0|0|0|0|0|0|0|0
1638|Normal Life (1996)|25-Oct-1996||http://us.imdb.com/M/title-exact?Normal%20Life%20(1996)|0|0|0|0|0|0|1|0|1|0|0|0|0|0|0|0|0|0|0
1639|Bitter Sugar (Azucar Amargo) (1996)|22-Nov-1996||http://us.imdb.com/M/title-exact?Bitter%20Sugar%20(1996)|0|0|0|0|0|0|0|0|1|0|0|0|0|0|0|0|0|0|0
1640|Eighth Day, The (1996)|01-Nov-1996||http://us.imdb.com/Title?Huiti%E8me+jour,+Le+(1996)|0|0|0|0|0|0|0|0|1|0|0|0|0|0|0|0|0|0|0
1641|Dadetown (1995)|18-Sep-1996||http://us.imdb.com/M/title-exact?Dadetown%20(1995)|0|0|0|0|0|0|0|1|0|0|0|0|0|0|0|0|0|0|0
1642|Some Mother's Son (1996)|27-Dec-1996||http://us.imdb.com/M/title-exact?Some%20Mother's%20Son%20(1996)|0|0|0|0|0|0|0|0|1|0|0|0|0|0|0|0|0|0|0
1643|Angel Baby (1995)|10-Jan-1997||http://us.imdb.com/Title?Angel+Baby+(1995/I)|0|0|0|0|0|0|0|0|1|0|0|0|0|0|0|0|0|0|0
1644|Sudden Manhattan (1996)|13-Jun-1997||http://us.imdb.com/M/title-exact?Sudden%20Manhattan%20%281996%29|0|0|0|0|0|1|0|0|0|0|0|0|0|0|0|0|0|0|0
1645|Butcher Boy, The (1998)|01-Jan-1998||http://us.imdb.com/M/title-exact?imdb-title-118804|0|0|0|0|0|0|0|0|1|0|0|0|0|0|0|0|0|0|0
1646|Men With Guns (1997)|06-Mar-1998||http://us.imdb.com/Title?Men+with+Guns+(1997/I)|0|1|0|0|0|0|0|0|1|0|0|0|0|0|0|0|0|0|0
1647|Hana-bi (1997)|20-Mar-1998||http://us.imdb.com/Title?Hana-bi+(1997)|0|0|0|0|0|1|1|0|1|0|0|0|0|0|0|0|0|0|0
1648|Niagara, Niagara (1997)|20-Mar-1998||http://us.imdb.com/Title?Niagara,+Niagara+(1997)|0|0|0|0|0|0|0|0|1|0|0|0|0|0|0|0|0|0|0
1649|Big One, The (1997)|27-Mar-1998||http://us.imdb.com/Title?Big+One,+The+(1997)|0|0|0|0|0|1|0|1|0|0|0|0|0|0|0|0|0|0|0
1650|Butcher Boy, The (1998)|01-Jan-1998||http://us.imdb.com/M/title-exact?imdb-title-118804|0|0|0|0|0|0|0|0|1|0|0|0|0|0|0|0|0|0|0
1651|Spanish Prisoner, The (1997)|27-Mar-1998||http://us.imdb.com/Title?Spanish+Prisoner,+The+(1997)|0|0|0|0|0|0|0|0|1|0|0|0|0|0|0|0|1|0|0
1652|Temptress Moon (Feng Yue) (1996)|13-Jun-1997||http://us.imdb.com/M/title-exact?Feng%20Yue%20%281996%29|0|0|0|0|0|0|0|0|0|0|0|0|0|0|1|0|0|0|0
1653|Entertaining Angels: The Dorothy Day Story (1996)|27-Sep-1996||http://us.imdb.com/M/title-exact?Entertaining%20Angels:%20The%20Dorothy%20Day%20Story%20(1996)|0|0|0|0|0|0|0|0|1|0|0|0|0|0|0|0|0|0|0
1654|Chairman of the Board (1998)|01-Jan-1998||http://us.imdb.com/Title?Chairman+of+the+Board+(1998)|0|0|0|0|0|1|0|0|0|0|0|0|0|0|0|0|0|0|0
1655|Favor, The (1994)|01-Jan-1994||http://us.imdb.com/M/title-exact?Favor,%20The%20(1994)|0|0|0|0|0|1|0|0|0|0|0|0|0|0|1|0|0|0|0
1656|Little City (1998)|20-Feb-1998||http://us.imdb.com/M/title-exact?Little+City+(1998)|0|0|0|0|0|1|0|0|0|0|0|0|0|0|1|0|0|0|0
1657|Target (1995)|28-Feb-1996||http://us.imdb.com/M/title-exact?Target%20(1995)|0|1|0|0|0|0|0|0|1|0|0|0|0|0|0|0|0|0|0
1658|Substance of Fire, The (1996)|06-Dec-1996||http://us.imdb.com/M/title-exact?Substance%20of%20Fire,%20The%20(1996)|0|0|0|0|0|0|0|0|1|0|0|0|0|0|0|0|0|0|0
1659|Getting Away With Murder (1996)|12-Apr-1996||http://us.imdb.com/Title?Getting+Away+With+Murder+(1996)|0|0|0|0|0|1|0|0|0|0|0|0|0|0|0|0|0|0|0
1660|Small Faces (1995)|09-Aug-1996||http://us.imdb.com/M/title-exact?Small%20Faces%20(1995)|0|0|0|0|0|0|0|0|1|0|0|0|0|0|0|0|0|0|0
1661|New Age, The (1994)|01-Jan-1994||http://us.imdb.com/M/title-exact?New%20Age,%20The%20(1994)|0|0|0|0|0|0|0|0|1|0|0|0|0|0|0|0|0|0|0
1662|Rough Magic (1995)|30-May-1997||http://us.imdb.com/M/title-exact?Rough%20Magic%20%281995%29|0|0|0|0|0|0|0|0|1|0|0|0|0|0|1|0|0|0|0
1663|Nothing Personal (1995)|30-Apr-1997||http://us.imdb.com/M/title-exact?Nothing%20Personal%20(1995)|0|0|0|0|0|0|0|0|1|0|0|0|0|0|0|0|0|1|0
1664|8 Heads in a Duffel Bag (1997)|18-Apr-1997||http://us.imdb.com/Title?8+Heads+in+a+Duffel+Bag+(1997)|0|0|0|0|0|1|0|0|0|0|0|0|0|0|0|0|0|0|0
1665|Brother's Kiss, A (1997)|25-Apr-1997||http://us.imdb.com/M/title-exact?Brother%27s%20Kiss%2C%20A%20%281997%29|0|0|0|0|0|0|0|0|1|0|0|0|0|0|0|0|0|0|0
1666|Ripe (1996)|02-May-1997||http://us.imdb.com/M/title-exact?Ripe%20%281996%29|0|0|0|0|0|0|0|0|1|0|0|0|0|0|0|0|0|0|0
1667|Next Step, The (1995)|13-Jun-1997||http://us.imdb.com/M/title-exact?Next%20Step%2C%20The%20%281995%29|0|0|0|0|0|0|0|0|1|0|0|0|0|0|0|0|0|0|0
1668|Wedding Bell Blues (1996)|13-Jun-1997||http://us.imdb.com/M/title-exact?Wedding%20Bell%20Blues%20%281996%29|0|0|0|0|0|1|0|0|0|0|0|0|0|0|0|0|0|0|0
1669|MURDER and murder (1996)|20-Jun-1997||http://us.imdb.com/M/title-exact?MURDER+and+murder+(1996)|0|0|0|0|0|0|1|0|1|0|0|0|0|1|0|0|0|0|0
1670|Tainted (1998)|01-Feb-1998||http://us.imdb.com/M/title-exact?Tainted+(1998)|0|0|0|0|0|1|0|0|0|0|0|0|0|0|0|0|1|0|0
1671|Further Gesture, A (1996)|20-Feb-1998||http://us.imdb.com/M/title-exact?Further+Gesture%2C+A+(1996)|0|0|0|0|0|0|0|0|1|0|0|0|0|0|0|0|0|0|0
1672|Kika (1993)|01-Jan-1993||http://us.imdb.com/M/title-exact?Kika%20(1993)|0|0|0|0|0|0|0|0|1|0|0|0|0|0|0|0|0|0|0
1673|Mirage (1995)|01-Jan-1995||http://us.imdb.com/M/title-exact?Mirage%20(1995)|0|1|0|0|0|0|0|0|0|0|0|0|0|0|0|0|1|0|0
1674|Mamma Roma (1962)|01-Jan-1962||http://us.imdb.com/M/title-exact?Mamma%20Roma%20(1962)|0|0|0|0|0|0|0|0|1|0|0|0|0|0|0|0|0|0|0
1675|Sunchaser, The (1996)|25-Oct-1996||http://us.imdb.com/M/title-exact?Sunchaser,%20The%20(1996)|0|0|0|0|0|0|0|0|1|0|0|0|0|0|0|0|0|0|0
1676|War at Home, The (1996)|01-Jan-1996||http://us.imdb.com/M/title-exact?War%20at%20Home%2C%20The%20%281996%29|0|0|0|0|0|0|0|0|1|0|0|0|0|0|0|0|0|0|0
1677|Sweet Nothing (1995)|20-Sep-1996||http://us.imdb.com/M/title-exact?Sweet%20Nothing%20(1995)|0|0|0|0|0|0|0|0|1|0|0|0|0|0|0|0|0|0|0
1678|Mat' i syn (1997)|06-Feb-1998||http://us.imdb.com/M/title-exact?Mat%27+i+syn+(1997)|0|0|0|0|0|0|0|0|1|0|0|0|0|0|0|0|0|0|0
1679|B. Monkey (1998)|06-Feb-1998||http://us.imdb.com/M/title-exact?B%2E+Monkey+(1998)|0|0|0|0|0|0|0|0|0|0|0|0|0|0|1|0|1|0|0
1680|Sliding Doors (1998)|01-Jan-1998||http://us.imdb.com/Title?Sliding+Doors+(1998)|0|0|0|0|0|0|0|0|1|0|0|0|0|0|1|0|0|0|0
1681|You So Crazy (1994)|01-Jan-1994||http://us.imdb.com/M/title-exact?You%20So%20Crazy%20(1994)|0|0|0|0|0|1|0|0|0|0|0|0|0|0|0|0|0|0|0
1682|Scream of Stone (Schrei aus Stein) (1991)|08-Mar-1996||http://us.imdb.com/M/title-exact?Schrei%20aus%20Stein%20(1991)|0|0|0|0|0|0|0|0|1|0|0|0|0|0|0|0|0|0|0
