# Supplementary material
Source: ML conference proceedings conference paper supplement (https://proceedings.neurips.cc/paper_files/paper/2022/hash/01ecd39ca49ddecc5729ca996304781b-Abstract.html)
Supplement: Supplementary file 1 [file 01ecd39ca49ddecc5729ca996304781b-Supplemental-Conference.zip › supplementary NEURIPS 2022/CODE_supplementary/data/ml-100k/u.occupation]

administrator
artist
doctor
educator
engineer
entertainment
executive
healthcare
homemaker
lawyer
librarian
marketing
none
other
programmer
retired
salesman
scientist
student
technician
writer
