# Supplementary material
Source: ML conference proceedings conference paper supplement (https://proceedings.neurips.cc/paper_files/paper/2022/hash/01ecd39ca49ddecc5729ca996304781b-Abstract.html)
Supplement: Supplementary file 1 [file 01ecd39ca49ddecc5729ca996304781b-Supplemental-Conference.zip › supplementary NEURIPS 2022/CODE_supplementary/data/ml-100k/u.user]

1|24|M|technician|85711
2|53|F|other|94043
3|23|M|writer|32067
4|24|M|technician|43537
5|33|F|other|15213
6|42|M|executive|98101
7|57|M|administrator|91344
8|36|M|administrator|05201
9|29|M|student|01002
10|53|M|lawyer|90703
11|39|F|other|30329
12|28|F|other|06405
13|47|M|educator|29206
14|45|M|scientist|55106
15|49|F|educator|97301
16|21|M|entertainment|10309
17|30|M|programmer|06355
18|35|F|other|37212
19|40|M|librarian|02138
20|42|F|homemaker|95660
21|26|M|writer|30068
22|25|M|writer|40206
23|30|F|artist|48197
24|21|F|artist|94533
25|39|M|engineer|55107
26|49|M|engineer|21044
27|40|F|librarian|30030
28|32|M|writer|55369
29|41|M|programmer|94043
30|7|M|student|55436
31|24|M|artist|10003
32|28|F|student|78741
33|23|M|student|27510
34|38|F|administrator|42141
35|20|F|homemaker|42459
36|19|F|student|93117
37|23|M|student|55105
38|28|F|other|54467
39|41|M|entertainment|01040
40|38|M|scientist|27514
41|33|M|engineer|80525
42|30|M|administrator|17870
43|29|F|librarian|20854
44|26|M|technician|46260
45|29|M|programmer|50233
46|27|F|marketing|46538
47|53|M|marketing|07102
48|45|M|administrator|12550
49|23|F|student|76111
50|21|M|writer|52245
51|28|M|educator|16509
52|18|F|student|55105
53|26|M|programmer|55414
54|22|M|executive|66315
55|37|M|programmer|01331
56|25|M|librarian|46260
57|16|M|none|84010
58|27|M|programmer|52246
59|49|M|educator|08403
60|50|M|healthcare|06472
61|36|M|engineer|30040
62|27|F|administrator|97214
63|31|M|marketing|75240
64|32|M|educator|43202
65|51|F|educator|48118
66|23|M|student|80521
67|17|M|student|60402
68|19|M|student|22904
69|24|M|engineer|55337
70|27|M|engineer|60067
71|39|M|scientist|98034
72|48|F|administrator|73034
73|24|M|student|41850
74|39|M|scientist|T8H1N
75|24|M|entertainment|08816
76|20|M|student|02215
77|30|M|technician|29379
78|26|M|administrator|61801
79|39|F|administrator|03755
80|34|F|administrator|52241
81|21|M|student|21218
82|50|M|programmer|22902
83|40|M|other|44133
84|32|M|executive|55369
85|51|M|educator|20003
86|26|M|administrator|46005
87|47|M|administrator|89503
88|49|F|librarian|11701
89|43|F|administrator|68106
90|60|M|educator|78155
91|55|M|marketing|01913
92|32|M|entertainment|80525
93|48|M|executive|23112
94|26|M|student|71457
95|31|M|administrator|10707
96|25|F|artist|75206
97|43|M|artist|98006
98|49|F|executive|90291
99|20|M|student|63129
100|36|M|executive|90254
101|15|M|student|05146
102|38|M|programmer|30220
103|26|M|student|55108
104|27|M|student|55108
105|24|M|engineer|94043
106|61|M|retired|55125
107|39|M|scientist|60466
108|44|M|educator|63130
109|29|M|other|55423
110|19|M|student|77840
111|57|M|engineer|90630
112|30|M|salesman|60613
113|47|M|executive|95032
114|27|M|programmer|75013
115|31|M|engineer|17110
116|40|M|healthcare|97232
117|20|M|student|16125
118|21|M|administrator|90210
119|32|M|programmer|67401
120|47|F|other|06260
121|54|M|librarian|99603
122|32|F|writer|22206
123|48|F|artist|20008
124|34|M|student|60615
125|30|M|lawyer|22202
126|28|F|lawyer|20015
127|33|M|none|73439
128|24|F|marketing|20009
129|36|F|marketing|07039
130|20|M|none|60115
131|59|F|administrator|15237
132|24|M|other|94612
133|53|M|engineer|78602
134|31|M|programmer|80236
135|23|M|student|38401
136|51|M|other|97365
137|50|M|educator|84408
138|46|M|doctor|53211
139|20|M|student|08904
140|30|F|student|32250
141|49|M|programmer|36117
142|13|M|other|48118
143|42|M|technician|08832
144|53|M|programmer|20910
145|31|M|entertainment|V3N4P
146|45|M|artist|83814
147|40|F|librarian|02143
148|33|M|engineer|97006
149|35|F|marketing|17325
150|20|F|artist|02139
151|38|F|administrator|48103
152|33|F|educator|68767
153|25|M|student|60641
154|25|M|student|53703
155|32|F|other|11217
156|25|M|educator|08360
157|57|M|engineer|70808
158|50|M|educator|27606
159|23|F|student|55346
160|27|M|programmer|66215
161|50|M|lawyer|55104
162|25|M|artist|15610
163|49|M|administrator|97212
164|47|M|healthcare|80123
165|20|F|other|53715
166|47|M|educator|55113
167|37|M|other|L9G2B
168|48|M|other|80127
169|52|F|other|53705
170|53|F|healthcare|30067
171|48|F|educator|78750
172|55|M|marketing|22207
173|56|M|other|22306
174|30|F|administrator|52302
175|26|F|scientist|21911
176|28|M|scientist|07030
177|20|M|programmer|19104
178|26|M|other|49512
179|15|M|entertainment|20755
180|22|F|administrator|60202
181|26|M|executive|21218
182|36|M|programmer|33884
183|33|M|scientist|27708
184|37|M|librarian|76013
185|53|F|librarian|97403
186|39|F|executive|00000
187|26|M|educator|16801
188|42|M|student|29440
189|32|M|artist|95014
190|30|M|administrator|95938
191|33|M|administrator|95161
192|42|M|educator|90840
193|29|M|student|49931
194|38|M|administrator|02154
195|42|M|scientist|93555
196|49|M|writer|55105
197|55|M|technician|75094
198|21|F|student|55414
199|30|M|writer|17604
200|40|M|programmer|93402
201|27|M|writer|E2A4H
202|41|F|educator|60201
203|25|F|student|32301
204|52|F|librarian|10960
205|47|M|lawyer|06371
206|14|F|student|53115
207|39|M|marketing|92037
208|43|M|engineer|01720
209|33|F|educator|85710
210|39|M|engineer|03060
211|66|M|salesman|32605
212|49|F|educator|61401
213|33|M|executive|55345
214|26|F|librarian|11231
215|35|M|programmer|63033
216|22|M|engineer|02215
217|22|M|other|11727
218|37|M|administrator|06513
219|32|M|programmer|43212
220|30|M|librarian|78205
221|19|M|student|20685
222|29|M|programmer|27502
223|19|F|student|47906
224|31|F|educator|43512
225|51|F|administrator|58202
226|28|M|student|92103
227|46|M|executive|60659
228|21|F|student|22003
229|29|F|librarian|22903
230|28|F|student|14476
231|48|M|librarian|01080
232|45|M|scientist|99709
233|38|M|engineer|98682
234|60|M|retired|94702
235|37|M|educator|22973
236|44|F|writer|53214
237|49|M|administrator|63146
238|42|F|administrator|44124
239|39|M|artist|95628
240|23|F|educator|20784
241|26|F|student|20001
242|33|M|educator|31404
243|33|M|educator|60201
244|28|M|technician|80525
245|22|M|student|55109
246|19|M|student|28734
247|28|M|engineer|20770
248|25|M|student|37235
249|25|M|student|84103
250|29|M|executive|95110
251|28|M|doctor|85032
252|42|M|engineer|07733
253|26|F|librarian|22903
254|44|M|educator|42647
255|23|M|entertainment|07029
256|35|F|none|39042
257|17|M|student|77005
258|19|F|student|77801
259|21|M|student|48823
260|40|F|artist|89801
261|28|M|administrator|85202
262|19|F|student|78264
263|41|M|programmer|55346
264|36|F|writer|90064
265|26|M|executive|84601
266|62|F|administrator|78756
267|23|M|engineer|83716
268|24|M|engineer|19422
269|31|F|librarian|43201
270|18|F|student|63119
271|51|M|engineer|22932
272|33|M|scientist|53706
273|50|F|other|10016
274|20|F|student|55414
275|38|M|engineer|92064
276|21|M|student|95064
277|35|F|administrator|55406
278|37|F|librarian|30033
279|33|M|programmer|85251
280|30|F|librarian|22903
281|15|F|student|06059
282|22|M|administrator|20057
283|28|M|programmer|55305
284|40|M|executive|92629
285|25|M|programmer|53713
286|27|M|student|15217
287|21|M|salesman|31211
288|34|M|marketing|23226
289|11|M|none|94619
290|40|M|engineer|93550
291|19|M|student|44106
292|35|F|programmer|94703
293|24|M|writer|60804
294|34|M|technician|92110
295|31|M|educator|50325
296|43|F|administrator|16803
297|29|F|educator|98103
298|44|M|executive|01581
299|29|M|doctor|63108
300|26|F|programmer|55106
301|24|M|student|55439
302|42|M|educator|77904
303|19|M|student|14853
304|22|F|student|71701
305|23|M|programmer|94086
306|45|M|other|73132
307|25|M|student|55454
308|60|M|retired|95076
309|40|M|scientist|70802
310|37|M|educator|91711
311|32|M|technician|73071
312|48|M|other|02110
313|41|M|marketing|60035
314|20|F|student|08043
315|31|M|educator|18301
316|43|F|other|77009
317|22|M|administrator|13210
318|65|M|retired|06518
319|38|M|programmer|22030
320|19|M|student|24060
321|49|F|educator|55413
322|20|M|student|50613
323|21|M|student|19149
324|21|F|student|02176
325|48|M|technician|02139
326|41|M|administrator|15235
327|22|M|student|11101
328|51|M|administrator|06779
329|48|M|educator|01720
330|35|F|educator|33884
331|33|M|entertainment|91344
332|20|M|student|40504
333|47|M|other|V0R2M
334|32|M|librarian|30002
335|45|M|executive|33775
336|23|M|salesman|42101
337|37|M|scientist|10522
338|39|F|librarian|59717
339|35|M|lawyer|37901
340|46|M|engineer|80123
341|17|F|student|44405
342|25|F|other|98006
343|43|M|engineer|30093
344|30|F|librarian|94117
345|28|F|librarian|94143
346|34|M|other|76059
347|18|M|student|90210
348|24|F|student|45660
349|68|M|retired|61455
350|32|M|student|97301
351|61|M|educator|49938
352|37|F|programmer|55105
353|25|M|scientist|28480
354|29|F|librarian|48197
355|25|M|student|60135
356|32|F|homemaker|92688
357|26|M|executive|98133
358|40|M|educator|10022
359|22|M|student|61801
360|51|M|other|98027
361|22|M|student|44074
362|35|F|homemaker|85233
363|20|M|student|87501
364|63|M|engineer|01810
365|29|M|lawyer|20009
366|20|F|student|50670
367|17|M|student|37411
368|18|M|student|92113
369|24|M|student|91335
370|52|M|writer|08534
371|36|M|engineer|99206
372|25|F|student|66046
373|24|F|other|55116
374|36|M|executive|78746
375|17|M|entertainment|37777
376|28|F|other|10010
377|22|M|student|18015
378|35|M|student|02859
379|44|M|programmer|98117
380|32|M|engineer|55117
381|33|M|artist|94608
382|45|M|engineer|01824
383|42|M|administrator|75204
384|52|M|programmer|45218
385|36|M|writer|10003
386|36|M|salesman|43221
387|33|M|entertainment|37412
388|31|M|other|36106
389|44|F|writer|83702
390|42|F|writer|85016
391|23|M|student|84604
392|52|M|writer|59801
393|19|M|student|83686
394|25|M|administrator|96819
395|43|M|other|44092
396|57|M|engineer|94551
397|17|M|student|27514
398|40|M|other|60008
399|25|M|other|92374
400|33|F|administrator|78213
401|46|F|healthcare|84107
402|30|M|engineer|95129
403|37|M|other|06811
404|29|F|programmer|55108
405|22|F|healthcare|10019
406|52|M|educator|93109
407|29|M|engineer|03261
408|23|M|student|61755
409|48|M|administrator|98225
410|30|F|artist|94025
411|34|M|educator|44691
412|25|M|educator|15222
413|55|M|educator|78212
414|24|M|programmer|38115
415|39|M|educator|85711
416|20|F|student|92626
417|27|F|other|48103
418|55|F|none|21206
419|37|M|lawyer|43215
420|53|M|educator|02140
421|38|F|programmer|55105
422|26|M|entertainment|94533
423|64|M|other|91606
424|36|F|marketing|55422
425|19|M|student|58644
426|55|M|educator|01602
427|51|M|doctor|85258
428|28|M|student|55414
429|27|M|student|29205
430|38|M|scientist|98199
431|24|M|marketing|92629
432|22|M|entertainment|50311
433|27|M|artist|11211
434|16|F|student|49705
435|24|M|engineer|60007
436|30|F|administrator|17345
437|27|F|other|20009
438|51|F|administrator|43204
439|23|F|administrator|20817
440|30|M|other|48076
441|50|M|technician|55013
442|22|M|student|85282
443|35|M|salesman|33308
444|51|F|lawyer|53202
445|21|M|writer|92653
446|57|M|educator|60201
447|30|M|administrator|55113
448|23|M|entertainment|10021
449|23|M|librarian|55021
450|35|F|educator|11758
451|16|M|student|48446
452|35|M|administrator|28018
453|18|M|student|06333
454|57|M|other|97330
455|48|M|administrator|83709
456|24|M|technician|31820
457|33|F|salesman|30011
458|47|M|technician|Y1A6B
459|22|M|student|29201
460|44|F|other|60630
461|15|M|student|98102
462|19|F|student|02918
463|48|F|healthcare|75218
464|60|M|writer|94583
465|32|M|other|05001
466|22|M|student|90804
467|29|M|engineer|91201
468|28|M|engineer|02341
469|60|M|educator|78628
470|24|M|programmer|10021
471|10|M|student|77459
472|24|M|student|87544
473|29|M|student|94708
474|51|M|executive|93711
475|30|M|programmer|75230
476|28|M|student|60440
477|23|F|student|02125
478|29|M|other|10019
479|30|M|educator|55409
480|57|M|retired|98257
481|73|M|retired|37771
482|18|F|student|40256
483|29|M|scientist|43212
484|27|M|student|21208
485|44|F|educator|95821
486|39|M|educator|93101
487|22|M|engineer|92121
488|48|M|technician|21012
489|55|M|other|45218
490|29|F|artist|V5A2B
491|43|F|writer|53711
492|57|M|educator|94618
493|22|M|engineer|60090
494|38|F|administrator|49428
495|29|M|engineer|03052
496|21|F|student|55414
497|20|M|student|50112
498|26|M|writer|55408
499|42|M|programmer|75006
500|28|M|administrator|94305
501|22|M|student|10025
502|22|M|student|23092
503|50|F|writer|27514
504|40|F|writer|92115
505|27|F|other|20657
506|46|M|programmer|03869
507|18|F|writer|28450
508|27|M|marketing|19382
509|23|M|administrator|10011
510|34|M|other|98038
511|22|M|student|21250
512|29|M|other|20090
513|43|M|administrator|26241
514|27|M|programmer|20707
515|53|M|marketing|49508
516|53|F|librarian|10021
517|24|M|student|55454
518|49|F|writer|99709
519|22|M|other|55320
520|62|M|healthcare|12603
521|19|M|student|02146
522|36|M|engineer|55443
523|50|F|administrator|04102
524|56|M|educator|02159
525|27|F|administrator|19711
526|30|M|marketing|97124
527|33|M|librarian|12180
528|18|M|student|55104
529|47|F|administrator|44224
530|29|M|engineer|94040
531|30|F|salesman|97408
532|20|M|student|92705
533|43|M|librarian|02324
534|20|M|student|05464
535|45|F|educator|80302
536|38|M|engineer|30078
537|36|M|engineer|22902
538|31|M|scientist|21010
539|53|F|administrator|80303
540|28|M|engineer|91201
541|19|F|student|84302
542|21|M|student|60515
543|33|M|scientist|95123
544|44|F|other|29464
545|27|M|technician|08052
546|36|M|executive|22911
547|50|M|educator|14534
548|51|M|writer|95468
549|42|M|scientist|45680
550|16|F|student|95453
551|25|M|programmer|55414
552|45|M|other|68147
553|58|M|educator|62901
554|32|M|scientist|62901
555|29|F|educator|23227
556|35|F|educator|30606
557|30|F|writer|11217
558|56|F|writer|63132
559|69|M|executive|10022
560|32|M|student|10003
561|23|M|engineer|60005
562|54|F|administrator|20879
563|39|F|librarian|32707
564|65|M|retired|94591
565|40|M|student|55422
566|20|M|student|14627
567|24|M|entertainment|10003
568|39|M|educator|01915
569|34|M|educator|91903
570|26|M|educator|14627
571|34|M|artist|01945
572|51|M|educator|20003
573|68|M|retired|48911
574|56|M|educator|53188
575|33|M|marketing|46032
576|48|M|executive|98281
577|36|F|student|77845
578|31|M|administrator|M7A1A
579|32|M|educator|48103
580|16|M|student|17961
581|37|M|other|94131
582|17|M|student|93003
583|44|M|engineer|29631
584|25|M|student|27511
585|69|M|librarian|98501
586|20|M|student|79508
587|26|M|other|14216
588|18|F|student|93063
589|21|M|lawyer|90034
590|50|M|educator|82435
591|57|F|librarian|92093
592|18|M|student|97520
593|31|F|educator|68767
594|46|M|educator|M4J2K
595|25|M|programmer|31909
596|20|M|artist|77073
597|23|M|other|84116
598|40|F|marketing|43085
599|22|F|student|R3T5K
600|34|M|programmer|02320
601|19|F|artist|99687
602|47|F|other|34656
603|21|M|programmer|47905
604|39|M|educator|11787
605|33|M|engineer|33716
606|28|M|programmer|63044
607|49|F|healthcare|02154
608|22|M|other|10003
609|13|F|student|55106
610|22|M|student|21227
611|46|M|librarian|77008
612|36|M|educator|79070
613|37|F|marketing|29678
614|54|M|educator|80227
615|38|M|educator|27705
616|55|M|scientist|50613
617|27|F|writer|11201
618|15|F|student|44212
619|17|M|student|44134
620|18|F|writer|81648
621|17|M|student|60402
622|25|M|programmer|14850
623|50|F|educator|60187
624|19|M|student|30067
625|27|M|programmer|20723
626|23|M|scientist|19807
627|24|M|engineer|08034
628|13|M|none|94306
629|46|F|other|44224
630|26|F|healthcare|55408
631|18|F|student|38866
632|18|M|student|55454
633|35|M|programmer|55414
634|39|M|engineer|T8H1N
635|22|M|other|23237
636|47|M|educator|48043
637|30|M|other|74101
638|45|M|engineer|01940
639|42|F|librarian|12065
640|20|M|student|61801
641|24|M|student|60626
642|18|F|student|95521
643|39|M|scientist|55122
644|51|M|retired|63645
645|27|M|programmer|53211
646|17|F|student|51250
647|40|M|educator|45810
648|43|M|engineer|91351
649|20|M|student|39762
650|42|M|engineer|83814
651|65|M|retired|02903
652|35|M|other|22911
653|31|M|executive|55105
654|27|F|student|78739
655|50|F|healthcare|60657
656|48|M|educator|10314
657|26|F|none|78704
658|33|M|programmer|92626
659|31|M|educator|54248
660|26|M|student|77380
661|28|M|programmer|98121
662|55|M|librarian|19102
663|26|M|other|19341
664|30|M|engineer|94115
665|25|M|administrator|55412
666|44|M|administrator|61820
667|35|M|librarian|01970
668|29|F|writer|10016
669|37|M|other|20009
670|30|M|technician|21114
671|21|M|programmer|91919
672|54|F|administrator|90095
673|51|M|educator|22906
674|13|F|student|55337
675|34|M|other|28814
676|30|M|programmer|32712
677|20|M|other|99835
678|50|M|educator|61462
679|20|F|student|54302
680|33|M|lawyer|90405
681|44|F|marketing|97208
682|23|M|programmer|55128
683|42|M|librarian|23509
684|28|M|student|55414
685|32|F|librarian|55409
686|32|M|educator|26506
687|31|F|healthcare|27713
688|37|F|administrator|60476
689|25|M|other|45439
690|35|M|salesman|63304
691|34|M|educator|60089
692|34|M|engineer|18053
693|43|F|healthcare|85210
694|60|M|programmer|06365
695|26|M|writer|38115
696|55|M|other|94920
697|25|M|other|77042
698|28|F|programmer|06906
699|44|M|other|96754
700|17|M|student|76309
701|51|F|librarian|56321
702|37|M|other|89104
703|26|M|educator|49512
704|51|F|librarian|91105
705|21|F|student|54494
706|23|M|student|55454
707|56|F|librarian|19146
708|26|F|homemaker|96349
709|21|M|other|N4T1A
710|19|M|student|92020
711|22|F|student|15203
712|22|F|student|54901
713|42|F|other|07204
714|26|M|engineer|55343
715|21|M|technician|91206
716|36|F|administrator|44265
717|24|M|technician|84105
718|42|M|technician|64118
719|37|F|other|V0R2H
720|49|F|administrator|16506
721|24|F|entertainment|11238
722|50|F|homemaker|17331
723|26|M|executive|94403
724|31|M|executive|40243
725|21|M|student|91711
726|25|F|administrator|80538
727|25|M|student|78741
728|58|M|executive|94306
729|19|M|student|56567
730|31|F|scientist|32114
731|41|F|educator|70403
732|28|F|other|98405
733|44|F|other|60630
734|25|F|other|63108
735|29|F|healthcare|85719
736|48|F|writer|94618
737|30|M|programmer|98072
738|35|M|technician|95403
739|35|M|technician|73162
740|25|F|educator|22206
741|25|M|writer|63108
742|35|M|student|29210
743|31|M|programmer|92660
744|35|M|marketing|47024
745|42|M|writer|55113
746|25|M|engineer|19047
747|19|M|other|93612
748|28|M|administrator|94720
749|33|M|other|80919
750|28|M|administrator|32303
751|24|F|other|90034
752|60|M|retired|21201
753|56|M|salesman|91206
754|59|F|librarian|62901
755|44|F|educator|97007
756|30|F|none|90247
757|26|M|student|55104
758|27|M|student|53706
759|20|F|student|68503
760|35|F|other|14211
761|17|M|student|97302
762|32|M|administrator|95050
763|27|M|scientist|02113
764|27|F|educator|62903
765|31|M|student|33066
766|42|M|other|10960
767|70|M|engineer|00000
768|29|M|administrator|12866
769|39|M|executive|06927
770|28|M|student|14216
771|26|M|student|15232
772|50|M|writer|27105
773|20|M|student|55414
774|30|M|student|80027
775|46|M|executive|90036
776|30|M|librarian|51157
777|63|M|programmer|01810
778|34|M|student|01960
779|31|M|student|K7L5J
780|49|M|programmer|94560
781|20|M|student|48825
782|21|F|artist|33205
783|30|M|marketing|77081
784|47|M|administrator|91040
785|32|M|engineer|23322
786|36|F|engineer|01754
787|18|F|student|98620
788|51|M|administrator|05779
789|29|M|other|55420
790|27|M|technician|80913
791|31|M|educator|20064
792|40|M|programmer|12205
793|22|M|student|85281
794|32|M|educator|57197
795|30|M|programmer|08610
796|32|F|writer|33755
797|44|F|other|62522
798|40|F|writer|64131
799|49|F|administrator|19716
800|25|M|programmer|55337
801|22|M|writer|92154
802|35|M|administrator|34105
803|70|M|administrator|78212
804|39|M|educator|61820
805|27|F|other|20009
806|27|M|marketing|11217
807|41|F|healthcare|93555
808|45|M|salesman|90016
809|50|F|marketing|30803
810|55|F|other|80526
811|40|F|educator|73013
812|22|M|technician|76234
813|14|F|student|02136
814|30|M|other|12345
815|32|M|other|28806
816|34|M|other|20755
817|19|M|student|60152
818|28|M|librarian|27514
819|59|M|administrator|40205
820|22|M|student|37725
821|37|M|engineer|77845
822|29|F|librarian|53144
823|27|M|artist|50322
824|31|M|other|15017
825|44|M|engineer|05452
826|28|M|artist|77048
827|23|F|engineer|80228
828|28|M|librarian|85282
829|48|M|writer|80209
830|46|M|programmer|53066
831|21|M|other|33765
832|24|M|technician|77042
833|34|M|writer|90019
834|26|M|other|64153
835|44|F|executive|11577
836|44|M|artist|10018
837|36|F|artist|55409
838|23|M|student|01375
839|38|F|entertainment|90814
840|39|M|artist|55406
841|45|M|doctor|47401
842|40|M|writer|93055
843|35|M|librarian|44212
844|22|M|engineer|95662
845|64|M|doctor|97405
846|27|M|lawyer|47130
847|29|M|student|55417
848|46|M|engineer|02146
849|15|F|student|25652
850|34|M|technician|78390
851|18|M|other|29646
852|46|M|administrator|94086
853|49|M|writer|40515
854|29|F|student|55408
855|53|M|librarian|04988
856|43|F|marketing|97215
857|35|F|administrator|V1G4L
858|63|M|educator|09645
859|18|F|other|06492
860|70|F|retired|48322
861|38|F|student|14085
862|25|M|executive|13820
863|17|M|student|60089
864|27|M|programmer|63021
865|25|M|artist|11231
866|45|M|other|60302
867|24|M|scientist|92507
868|21|M|programmer|55303
869|30|M|student|10025
870|22|M|student|65203
871|31|M|executive|44648
872|19|F|student|74078
873|48|F|administrator|33763
874|36|M|scientist|37076
875|24|F|student|35802
876|41|M|other|20902
877|30|M|other|77504
878|50|F|educator|98027
879|33|F|administrator|55337
880|13|M|student|83702
881|39|M|marketing|43017
882|35|M|engineer|40503
883|49|M|librarian|50266
884|44|M|engineer|55337
885|30|F|other|95316
886|20|M|student|61820
887|14|F|student|27249
888|41|M|scientist|17036
889|24|M|technician|78704
890|32|M|student|97301
891|51|F|administrator|03062
892|36|M|other|45243
893|25|M|student|95823
894|47|M|educator|74075
895|31|F|librarian|32301
896|28|M|writer|91505
897|30|M|other|33484
898|23|M|homemaker|61755
899|32|M|other|55116
900|60|M|retired|18505
901|38|M|executive|L1V3W
902|45|F|artist|97203
903|28|M|educator|20850
904|17|F|student|61073
905|27|M|other|30350
906|45|M|librarian|70124
907|25|F|other|80526
908|44|F|librarian|68504
909|50|F|educator|53171
910|28|M|healthcare|29301
911|37|F|writer|53210
912|51|M|other|06512
913|27|M|student|76201
914|44|F|other|08105
915|50|M|entertainment|60614
916|27|M|engineer|N2L5N
917|22|F|student|20006
918|40|M|scientist|70116
919|25|M|other|14216
920|30|F|artist|90008
921|20|F|student|98801
922|29|F|administrator|21114
923|21|M|student|E2E3R
924|29|M|other|11753
925|18|F|salesman|49036
926|49|M|entertainment|01701
927|23|M|programmer|55428
928|21|M|student|55408
929|44|M|scientist|53711
930|28|F|scientist|07310
931|60|M|educator|33556
932|58|M|educator|06437
933|28|M|student|48105
934|61|M|engineer|22902
935|42|M|doctor|66221
936|24|M|other|32789
937|48|M|educator|98072
938|38|F|technician|55038
939|26|F|student|33319
940|32|M|administrator|02215
941|20|M|student|97229
942|48|F|librarian|78209
943|22|M|student|77841
