# Supplementary material
Source: ML conference proceedings conference paper supplement (https://proceedings.neurips.cc/paper_files/paper/2022/hash/01ecd39ca49ddecc5729ca996304781b-Abstract.html)
Supplement: Supplementary file 1 [file 01ecd39ca49ddecc5729ca996304781b-Supplemental-Conference.zip › supplementary NEURIPS 2022/CODE_supplementary/data/ml-100k/u1.base]

1	1	5	874965758
1	2	3	876893171
1	3	4	878542960
1	4	3	876893119
1	5	3	889751712
1	7	4	875071561
1	8	1	875072484
1	9	5	878543541
1	11	2	875072262
1	13	5	875071805
1	15	5	875071608
1	16	5	878543541
1	18	4	887432020
1	19	5	875071515
1	21	1	878542772
1	22	4	875072404
1	25	4	875071805
1	26	3	875072442
1	28	4	875072173
1	29	1	878542869
1	30	3	878542515
1	32	5	888732909
1	34	2	878542869
1	35	1	878542420
1	37	2	878543030
1	38	3	878543075
1	40	3	876893230
1	41	2	876892818
1	42	5	876892425
1	43	4	878542869
1	45	5	875241687
1	46	4	876893230
1	48	5	875072520
1	50	5	874965954
1	52	4	875072205
1	55	5	875072688
1	57	5	878542459
1	58	4	878542960
1	59	5	876892817
1	63	2	878543196
1	66	4	878543030
1	68	4	875072688
1	71	3	876892425
1	75	4	878543238
1	77	4	876893205
1	79	4	875072865
1	83	3	875072370
1	87	5	878543541
1	88	4	878542791
1	89	5	875072484
1	93	5	875071484
1	94	2	875072956
1	95	4	875072303
1	99	3	875072547
1	101	2	878542845
1	105	2	875240739
1	106	4	875241390
1	109	5	874965739
1	110	1	878542845
1	111	5	889751711
1	115	5	878541637
1	116	3	878542960
1	119	5	876893098
1	122	3	875241498
1	123	4	875071541
1	124	5	875071484
1	126	2	875071713
1	127	5	874965706
1	131	1	878542552
1	133	4	876892818
1	135	4	875072404
1	136	3	876893206
1	137	5	875071541
1	138	1	878543006
1	139	3	878543216
1	141	3	878542608
1	142	2	878543238
1	144	4	875073180
1	146	4	875071561
1	147	3	875240993
1	149	2	878542791
1	152	5	878542589
1	153	3	876893230
1	156	4	874965556
1	158	3	878542699
1	162	4	878542420
1	165	5	874965518
1	166	5	874965677
1	167	2	878542383
1	168	5	874965478
1	169	5	878543541
1	172	5	874965478
1	173	5	878541803
1	176	5	876892468
1	178	5	878543541
1	179	3	875072370
1	181	5	874965739
1	182	4	875072520
1	187	4	874965678
1	191	5	875072956
1	192	4	875072547
1	194	4	876892743
1	195	5	876892855
1	197	5	875072956
1	198	5	878542717
1	199	4	875072262
1	203	4	878542231
1	204	5	875072688
1	205	3	878542909
1	207	5	875073067
1	211	3	878541970
1	216	5	876892701
1	217	3	876892676
1	220	3	875241390
1	223	5	876892918
1	231	1	876893031
1	234	4	876892355
1	237	2	875071749
1	238	4	875072235
1	239	4	878542845
1	240	3	875071898
1	244	2	887431973
1	245	2	875071713
1	246	5	874965905
1	247	1	875241619
1	249	4	874965970
1	251	4	875071843
1	256	4	889751712
1	257	4	874965954
1	261	1	875692992
1	263	1	875693007
1	268	5	875692927
1	269	5	877482427
1	270	5	888732827
1	271	2	887431672
2	1	4	888550871
2	10	2	888551853
2	14	4	888551853
2	25	4	888551648
2	100	5	888552084
2	111	4	888551853
2	127	5	888552084
2	237	4	888552017
2	242	5	888552084
2	255	4	888551341
2	258	3	888549961
2	269	4	888550774
2	272	5	888979061
2	273	4	888551647
2	274	3	888551497
2	275	5	888550939
2	276	4	888551552
2	277	4	888551174
2	278	3	888551647
2	282	4	888551922
2	283	5	888552084
2	284	4	888552017
2	285	5	888552084
2	286	4	888549960
2	287	3	888551235
2	288	3	888550252
2	289	3	888979353
2	291	3	888551647
2	293	4	888550939
2	294	1	888551648
2	295	4	888551164
2	296	3	888550871
2	300	4	888979197
2	302	5	888552084
2	304	4	888979197
2	305	3	888550065
2	306	4	888550774
2	309	1	888980029
2	310	4	888979061
2	311	5	888552084
3	181	4	889237482
3	258	2	889237026
3	260	4	889237455
3	268	3	889236961
3	271	3	889237224
3	288	2	889237026
3	302	2	889236939
3	303	3	889236983
3	317	2	889237482
3	319	2	889237026
3	320	5	889237482
3	321	5	889237455
3	322	3	889237269
3	325	1	889237297
3	326	2	889237224
3	329	4	889237455
3	333	2	889236939
3	336	1	889237198
3	338	2	889237297
3	339	3	889237141
3	340	5	889237455
3	342	4	889237174
3	344	4	889236939
3	346	5	889237455
3	347	5	889237455
3	352	2	889237055
3	353	1	889237122
3	355	3	889237247
4	11	4	892004520
4	210	3	892003374
4	258	5	892001374
4	271	4	892001690
4	300	5	892001445
4	301	5	892002353
4	324	5	892002353
4	327	5	892002352
4	328	3	892001537
4	329	5	892002352
4	358	2	892004275
4	359	5	892002352
4	360	5	892002352
4	362	5	892002352
5	21	3	875635327
5	25	3	875635318
5	29	4	875637023
5	50	4	875635758
5	63	1	878844629
5	66	1	875721019
5	70	4	875636389
5	95	4	875721168
5	99	3	875721216
5	101	5	878844510
5	105	3	875635443
5	121	4	875635189
5	135	4	875637536
5	145	1	875720830
5	151	3	875635723
5	162	1	875721572
5	163	5	879197864
5	168	3	875636691
5	169	5	878844495
5	172	5	875636130
5	174	5	875636130
5	181	5	875635757
5	183	4	875636014
5	186	5	875636375
5	189	5	878844495
5	194	4	878845197
5	200	2	875720717
5	204	4	875636675
5	208	4	875636675
5	210	3	875636099
5	216	1	875720967
5	226	3	875635962
5	228	5	875636070
5	229	2	875635947
5	233	4	875729064
5	235	4	875635384
5	239	4	875636655
5	250	3	875635265
5	257	5	875635239
5	365	1	875637144
5	366	3	875637145
5	367	3	875636281
5	368	1	875635457
5	371	1	875720967
5	373	3	875635907
5	374	3	875636905
5	375	3	875637587
5	378	1	875721167
5	380	3	875637191
5	381	1	875636540
5	383	3	875636588
5	386	2	875636230
5	387	3	875637419
5	390	5	875636340
5	392	2	875637330
5	395	2	879198898
5	396	5	875636265
5	398	2	875636167
5	399	3	875635947
5	401	5	875636308
5	404	2	875721216
5	405	3	875635225
5	406	1	875635807
5	408	5	878844495
5	409	2	878844651
5	412	3	875635416
5	414	3	875636691
5	415	1	875636842
5	416	1	875721196
5	419	3	875636815
5	420	3	875721168
5	425	2	875637440
5	427	3	875721167
5	430	5	875636631
5	431	3	875636099
5	432	4	875636793
5	434	5	875637033
5	437	1	878844423
5	438	1	878844423
5	440	1	878844423
5	442	1	879198898
5	443	4	875720744
5	446	4	875720845
5	447	3	875720744
5	448	2	875720692
5	449	2	875636099
5	450	1	875635962
5	451	1	875636571
5	452	1	878844397
5	455	4	875635174
5	456	1	875636375
6	1	4	883599478
6	7	2	883599102
6	8	4	883600657
6	9	4	883599205
6	12	4	883601053
6	13	2	883599400
6	21	3	883600152
6	22	3	883602048
6	47	3	883600943
6	50	4	883600842
6	64	4	883600597
6	71	4	883601053
6	79	3	883600747
6	89	4	883600842
6	111	2	883599478
6	127	5	883599134
6	132	5	883602422
6	137	5	883599327
6	153	4	883603013
6	165	5	883600747
6	166	4	883601426
6	168	4	883602865
6	169	4	883600943
6	170	4	883602574
6	173	5	883602462
6	174	4	883600985
6	177	4	883600818
6	178	4	883600785
6	182	4	883268776
6	185	5	883601393
6	186	4	883602730
6	191	4	883601088
6	192	4	883600914
6	194	4	883601365
6	200	3	883602422
6	202	3	883602690
6	203	3	883602864
6	216	5	883601500
6	223	4	883600747
6	237	2	883599914
6	242	4	883268170
6	246	3	883599509
6	257	2	883599478
6	259	1	883268375
6	261	3	883268522
6	268	3	883268406
6	272	4	883717304
6	274	4	883602501
6	285	3	883599431
6	293	3	883599327
6	298	3	883599558
6	302	4	883268222
6	303	3	883268321
6	306	4	883268246
6	308	3	883600445
6	309	2	883268430
6	310	2	883268353
6	317	3	883602174
6	321	3	883268353
6	340	2	883268278
6	367	2	883602690
6	405	1	883600066
6	408	4	883599075
6	410	4	883599707
6	419	4	883602284
6	425	3	883602865
6	427	4	883600707
6	435	4	883601529
6	460	2	883600004
6	461	4	883601393
6	462	5	883600914
6	464	2	883601365
6	465	1	883683508
6	468	3	883602174
6	472	1	883600003
6	473	2	883600111
6	474	5	883601277
6	482	4	883601203
6	485	5	883602664
6	489	5	883601011
6	490	5	883601365
6	491	4	883602174
6	493	5	883601713
6	494	4	883601713
6	495	4	883601366
6	496	4	883601155
6	497	4	883601088
6	501	5	883602730
6	502	4	883602664
6	503	3	883602133
6	504	3	883601155
6	505	4	883602422
6	507	4	883601310
6	510	4	883600785
6	512	4	883601155
6	514	5	883600657
6	516	4	883602664
6	519	5	883601365
6	520	4	883600985
6	522	5	883601500
6	527	4	883600877
6	529	4	883601459
6	530	4	883601203
6	531	4	883600747
6	533	4	883599830
6	535	2	883600030
6	536	4	883599400
6	537	4	883601277
6	538	2	883268483
6	539	2	883681433
7	4	5	891351772
7	9	5	891351432
7	11	3	891352451
7	12	5	892135346
7	23	3	891351383
7	25	3	891352451
7	27	4	891352692
7	29	3	891353828
7	31	4	892134959
7	39	5	891353614
7	47	5	891352692
7	50	5	891351042
7	51	2	891352984
7	52	4	891353801
7	56	5	891351432
7	62	3	891354499
7	64	5	891350756
7	68	4	891351547
7	69	5	891351728
7	70	1	891352557
7	71	5	891352692
7	73	3	892133154
7	77	5	891353325
7	80	4	891354381
7	86	4	891350810
7	91	3	891353860
7	96	5	891351383
7	97	5	891351201
7	98	4	891351002
7	99	5	891352557
7	100	5	891351082
7	125	4	891353192
7	132	5	891351287
7	134	4	892134959
7	135	5	891351547
7	140	5	891353124
7	141	5	891353444
7	143	3	892132627
7	144	5	891351201
7	145	1	891354530
7	152	4	891351851
7	157	5	891352059
7	164	5	891351813
7	173	5	891351002
7	175	5	892133057
7	178	4	891350932
7	179	5	891352303
7	180	5	891350782
7	186	4	891350900
7	187	4	891350757
7	192	4	891352010
7	194	5	891351851
7	197	4	891351082
7	198	3	891351685
7	199	5	892135346
7	201	2	891351471
7	202	3	891352947
7	204	5	891351121
7	211	5	891352557
7	213	3	891351686
7	214	5	891352384
7	215	4	891351624
7	216	4	891350900
7	217	4	891352778
7	219	1	892131924
7	229	3	891352384
7	230	3	891353326
7	231	3	892132885
7	234	5	891351041
7	237	5	891351772
7	238	5	891351814
7	258	4	892135277
7	265	5	891350845
7	275	4	891352831
7	286	4	891350703
7	294	1	892130809
7	309	3	891350704
7	317	4	892133670
7	318	5	891352010
7	324	1	892135078
7	341	3	892333206
7	356	4	891351728
7	357	5	892135347
7	365	4	891353744
7	367	5	891350810
7	379	4	891353325
7	380	4	891354053
7	384	3	891353710
7	386	4	892133310
7	387	3	892133670
7	391	3	892132943
7	402	5	891352904
7	403	4	891351234
7	405	3	891353290
7	415	2	891354438
7	416	5	891353051
7	417	3	892132652
7	419	3	891350900
7	421	3	891352134
7	427	5	891352220
7	429	5	891351002
7	433	5	892135347
7	434	4	891352384
7	436	5	891351471
7	440	1	892131978
7	441	2	891354257
7	443	5	891353254
7	444	5	891354288
7	446	2	892132020
7	447	5	891350900
7	449	3	891354785
7	452	5	891353860
7	463	4	891353192
7	465	4	891353154
7	470	3	891352489
7	474	5	891351002
7	487	3	891352178
7	488	4	891351041
7	499	4	891351472
7	502	5	891352261
7	503	4	891353950
7	506	5	891353614
7	507	5	891352383
7	509	5	891352778
7	510	5	891352134
7	513	4	891351772
7	521	5	891353124
7	523	4	891350845
7	527	5	891351772
7	529	2	891352626
7	540	3	892132972
7	544	3	891353254
7	545	2	891354882
7	546	4	891353444
7	547	3	891353710
7	549	4	891353086
7	551	1	892131978
7	552	4	891354531
7	556	3	891352659
7	557	4	892132145
7	558	4	892131924
7	561	4	891354611
7	565	4	892132019
7	566	4	891353411
7	568	5	891352261
7	569	4	892131978
7	571	3	891353950
7	572	3	891354331
7	573	5	891353828
7	574	5	892132402
7	575	3	892133271
7	577	2	892133310
7	578	3	891354090
7	583	2	892132380
7	584	4	891352093
7	585	4	892133180
7	586	3	891354639
7	588	4	891352261
7	590	2	891354730
7	591	3	891352179
7	592	5	891353652
7	593	5	891351851
7	594	3	891354114
7	595	2	891353801
7	596	5	891351728
7	597	3	891353744
7	598	3	891353801
7	600	4	891354090
7	601	5	891353744
7	602	3	891352594
7	603	4	891350757
7	605	4	891353290
7	606	3	891352904
7	607	3	891352831
7	609	3	891352749
7	610	5	891353086
7	611	3	891351161
7	612	5	891351121
7	613	4	891352010
7	615	4	891351585
7	616	4	891351002
7	617	5	891354588
7	620	4	891353892
7	625	3	892131824
7	628	3	891352831
7	629	3	891352526
7	631	4	891352984
7	632	5	891352261
7	634	5	891351287
7	635	3	891352864
7	638	4	892132122
7	639	5	891353676
7	640	3	891353614
7	641	5	892135346
7	646	5	891351383
7	649	5	891353254
7	651	5	891350932
7	652	3	891352659
7	655	5	891351384
7	656	3	891351509
7	660	5	891353051
7	663	5	891352220
7	664	3	891353977
7	665	4	891354471
7	666	4	892132192
7	668	4	891352778
7	670	5	891353254
7	671	5	891351728
7	672	1	892131925
7	677	3	891354499
7	678	3	891350356
7	679	5	891353124
7	682	2	891350383
8	11	3	879362233
8	55	5	879362286
8	82	5	879362356
8	96	3	879362183
8	174	5	879362183
8	177	4	879362233
8	181	4	879362183
8	187	4	879362123
8	195	5	879362287
8	222	5	879362356
8	227	4	879362423
8	228	5	879362286
8	229	5	879362356
8	233	4	879362423
8	241	4	879362423
8	243	2	879361732
8	259	1	879361604
8	260	3	879361665
8	273	3	879362287
8	336	3	879361664
8	341	2	879361825
8	358	2	879361732
8	403	4	879362234
8	431	2	879362356
8	435	5	879362233
8	510	4	879362233
8	518	4	879362422
8	566	3	879362423
8	684	4	879362356
8	688	1	879361732
9	7	4	886960030
9	50	5	886960055
9	201	5	886960055
9	242	4	886958715
9	276	4	886959423
9	294	4	886959453
9	371	5	886960055
9	385	5	886960055
9	402	4	886959343
9	483	5	886960056
9	615	4	886959344
9	690	1	886959344
10	9	4	877889005
10	11	4	877888677
10	12	5	877886911
10	23	5	877886911
10	32	4	877886661
10	33	4	877893020
10	40	4	877892438
10	50	5	877888545
10	59	4	877886722
10	60	3	877892110
10	69	4	877889131
10	70	4	877891747
10	82	4	877886912
10	85	4	877892438
10	93	4	877892160
10	116	4	877888944
10	129	4	877891966
10	134	5	877889131
10	137	4	877889186
10	153	4	877886722
10	157	5	877889004
10	161	4	877892050
10	162	4	877892210
10	170	4	877889333
10	174	4	877886661
10	178	5	877888677
10	179	5	877889004
10	180	5	877889333
10	182	5	877888876
10	185	5	877888876
10	192	4	877891966
10	197	5	877888944
10	198	3	877889005
10	205	5	877888812
10	211	5	877889130
10	216	4	877889333
10	221	4	877888677
10	230	4	877892210
10	238	4	877892276
10	245	4	877886281
10	273	4	877888613
10	274	4	877889333
10	276	4	877891904
10	286	4	877886162
10	302	4	877886162
10	319	3	877886223
10	333	4	877886359
10	334	4	877886281
10	357	5	877889186
10	404	4	877886911
10	414	4	877891966
10	430	3	877886597
10	432	4	877892160
10	462	3	877891747
10	467	4	877891904
10	470	4	877891747
10	478	5	877889004
10	479	5	877891966
10	480	5	877888943
10	482	4	877889262
10	484	5	877891904
10	499	4	877893021
10	502	4	877889261
10	510	5	877892209
10	511	4	877888877
10	513	4	877886598
10	518	4	877886722
10	525	5	877892210
10	527	4	877886597
10	529	3	877892438
10	530	4	877892210
10	531	5	877886911
10	582	4	877892276
10	589	5	877891905
10	602	5	877889057
10	604	4	877892110
10	606	5	877888876
10	610	4	877888613
10	617	5	877892160
10	629	4	877886722
10	654	5	877886597
10	663	3	877886598
10	664	4	877886911
10	686	4	877886911
10	692	4	877889261
10	693	4	877886783
10	694	5	877892437
10	697	3	877888677
10	699	4	877893020
10	700	4	877892277
10	701	4	877888812
10	707	5	877886783
10	708	4	877892438
10	709	4	877888613
11	8	4	891904949
11	11	2	891904271
11	15	5	891903067
11	24	3	891904016
11	25	3	891903836
11	28	5	891904241
11	29	3	891904805
11	39	3	891905824
11	42	3	891905058
11	52	3	891904335
11	54	3	891905936
11	56	4	891904949
11	57	2	891904552
11	58	3	891904596
11	69	3	891904270
11	70	4	891904573
11	79	4	891905783
11	83	5	891904335
11	86	4	891904551
11	88	3	891905003
11	98	2	891905783
11	107	4	891903276
11	121	3	891902745
11	123	3	891902745
11	125	4	891903108
11	168	3	891904949
11	173	5	891904920
11	176	3	891905783
11	180	2	891904335
11	196	5	891904270
11	208	4	891905032
11	211	3	891905003
11	213	4	891906389
11	222	3	891902718
11	228	3	891905824
11	229	4	891905878
11	237	4	891903005
11	238	3	891905032
11	239	4	891904617
11	258	5	891901696
11	259	3	891902270
11	274	3	891906510
11	286	5	891901606
11	290	3	891903877
11	301	4	891902157
11	317	4	891904174
11	318	5	891904194
11	324	1	891902222
11	332	5	891901769
11	356	4	891906327
11	357	5	891904241
11	365	3	891904764
11	367	3	891905058
11	370	3	891902880
11	372	4	891904968
11	382	3	891904573
11	386	3	891905279
11	393	4	891905222
11	399	3	891905279
11	401	3	891905324
11	405	3	891904016
11	414	3	891905393
11	423	5	891904174
11	427	4	891904300
11	430	3	891905032
11	431	2	891905896
11	433	4	891905003
11	434	4	891904270
11	449	3	891906327
11	451	2	891905003
11	504	3	891905856
11	508	4	891903005
11	526	3	891904859
11	527	4	891904335
11	544	4	891903226
11	549	4	891904617
11	577	3	891905555
11	580	5	891905222
11	603	4	891905783
11	646	3	891904389
11	654	3	891905856
11	659	5	891904920
11	662	3	891904300
11	690	4	891901716
11	692	4	891905003
11	699	4	891904389
11	707	5	891906389
11	715	3	891904764
11	716	3	891905058
11	717	2	891902815
11	718	5	891903836
11	719	3	891905279
11	724	3	891904551
11	727	3	891904335
11	728	3	891905366
11	729	4	891904637
11	731	4	891904789
11	737	4	891904789
11	738	3	891905324
11	742	3	891902815
11	745	5	891905324
11	747	3	891906426
11	748	1	891902270
11	749	5	891901797
11	750	5	891901629
12	4	5	879960826
12	69	5	879958902
12	88	5	879960826
12	98	5	879959068
12	127	4	879959488
12	133	4	879959670
12	159	4	879959306
12	161	5	879959553
12	168	4	879959513
12	170	4	879959374
12	174	5	879958969
12	195	4	879959670
12	202	4	879959514
12	203	3	879959583
12	215	4	879959553
12	216	5	879960826
12	228	4	879959465
12	238	5	879960826
12	242	5	879960826
12	328	4	879958742
12	392	4	879959025
12	416	3	879959025
12	480	4	879959161
12	591	5	879959212
12	708	3	879959394
13	1	3	882140487
13	4	5	882141306
13	5	1	882396869
13	7	2	882396790
13	8	4	882140001
13	9	3	882140205
13	12	5	881515011
13	13	5	882141617
13	17	1	882396954
13	22	4	882140487
13	23	5	882139937
13	28	5	882398814
13	32	4	882140286
13	33	5	882397581
13	37	1	882397011
13	38	3	882397974
13	39	3	882397581
13	49	4	882399419
13	50	5	882140001
13	51	3	882399419
13	53	1	882396955
13	58	4	882139966
13	60	4	884538767
13	62	5	882397833
13	67	1	882141686
13	68	3	882397741
13	69	4	884538766
13	70	3	882140691
13	78	1	882399218
13	79	3	882139746
13	82	2	882397503
13	83	2	886303585
13	86	1	881515348
13	87	5	882398814
13	89	4	882139717
13	91	2	882398724
13	92	3	882397271
13	95	5	882140104
13	96	4	882140104
13	99	4	882398654
13	110	3	882141130
13	111	5	882140588
13	116	5	882140455
13	117	3	882398138
13	127	5	881515411
13	128	1	882397502
13	132	4	882140002
13	135	5	882139541
13	138	1	882399218
13	141	2	890705034
13	143	1	882140205
13	145	2	882397011
13	152	5	882141393
13	155	2	882399615
13	157	3	882140552
13	158	1	882142057
13	160	4	882140070
13	163	3	882141582
13	164	3	882396790
13	165	3	881515295
13	166	5	884538663
13	170	5	882139774
13	172	5	882140355
13	174	4	882139829
13	175	4	882139717
13	176	3	882140455
13	177	5	882397271
13	179	2	882140206
13	182	5	882139347
13	183	4	882397271
13	184	1	882397011
13	187	5	882140205
13	188	4	882140130
13	191	3	881515193
13	193	5	882139937
13	194	5	882141458
13	197	4	881515239
13	199	5	882140001
13	200	3	882140552
13	202	5	882141425
13	204	5	882140318
13	205	2	881515193
13	209	3	882141306
13	211	4	882140002
13	216	3	881515193
13	218	1	882396869
13	222	3	882140285
13	223	5	882139901
13	224	4	882140166
13	225	2	882399156
13	227	5	882397650
13	228	4	882140389
13	231	3	882397582
13	233	4	882397650
13	234	5	882140252
13	235	2	882141841
13	237	5	882140285
13	239	4	882141752
13	241	3	882397502
13	242	2	881515193
13	260	1	882140848
13	262	4	881514876
13	264	4	882140848
13	274	3	882399384
13	275	3	886303585
13	279	5	882139804
13	280	4	882399528
13	285	5	882139937
13	286	3	881514683
13	288	1	882396790
13	292	5	882140867
13	299	3	881515698
13	306	3	881514876
13	307	2	881514684
13	310	4	881514683
13	311	3	881514726
13	313	4	882774047
13	316	5	888073653
13	321	2	882140740
13	322	3	882140792
13	323	3	882140848
13	326	3	882140792
13	327	3	881515521
13	328	3	881514811
13	329	2	886952246
13	332	3	881515457
13	336	2	882140848
13	339	3	882140718
13	342	4	885744650
13	346	4	883670552
13	347	5	885185824
13	348	2	886952246
13	350	2	886302293
13	355	3	888688733
13	357	3	881515411
13	358	3	881515521
13	362	4	890704999
13	367	3	882141458
13	370	1	882396984
13	371	3	882399385
13	382	1	882140624
13	393	3	882141617
13	394	2	882399615
13	398	2	882398410
13	400	4	885744650
13	401	1	882141841
13	403	2	882397271
13	404	5	882399014
13	406	1	882397011
13	410	1	882141997
13	411	2	882141924
13	413	1	882396984
13	417	2	882398934
13	419	3	882398814
13	424	1	882397068
13	427	5	882398814
13	429	5	884538727
13	430	5	882139495
13	432	4	882398654
13	433	4	881515239
13	435	5	882141392
13	438	1	882397068
13	439	1	882397040
13	441	1	882396984
13	442	1	890705056
13	444	4	882396984
13	445	4	882139774
13	446	1	882397039
13	448	1	882396869
13	453	2	882397067
13	455	3	882141425
13	462	5	882140487
13	463	5	882140318
13	471	1	882140455
13	473	4	882398724
13	474	4	881515112
13	475	3	881515113
13	478	4	884538571
13	484	5	882139804
13	485	1	882140624
13	491	4	882140166
13	492	5	882140552
13	494	4	881515295
13	497	5	882140166
13	504	5	881515011
13	506	5	882140691
13	507	1	882140070
13	510	5	882139717
13	511	5	882139863
13	515	2	881515193
13	518	4	882140252
13	522	5	882140425
13	523	4	882141306
13	525	5	882140624
13	527	5	882140252
13	529	4	882140206
13	531	3	882140104
13	538	1	884538448
13	541	1	882397650
13	547	1	882397011
13	549	4	882399357
13	550	4	882397741
13	551	1	882397084
13	553	2	882399419
13	554	2	882397833
13	558	1	882397011
13	559	1	882396913
13	561	1	882396914
13	563	1	882397039
13	565	1	882397040
13	566	5	882397502
13	568	3	882140552
13	569	2	882396955
13	572	2	882398255
13	573	3	882396955
13	576	3	882398076
13	578	3	882397974
13	585	4	882141814
13	586	3	882398326
13	590	2	882397068
13	602	4	884538634
13	603	4	884538571
13	606	4	882140130
13	613	4	881515411
13	619	3	886952245
13	621	4	882398934
13	629	1	882141582
13	630	2	886302261
13	631	3	882140624
13	635	1	882396984
13	636	2	882397502
13	637	2	882396913
13	638	3	881515239
13	639	3	882139804
13	646	4	882140037
13	647	5	882140206
13	650	2	882140425
13	654	5	881515295
13	655	5	886261387
13	656	5	882139746
13	657	4	882139829
13	661	5	881515411
13	662	5	882399420
13	663	5	882140252
13	667	1	882397040
13	668	1	882397068
13	669	1	882397067
13	670	3	882396955
13	671	3	882396790
13	672	1	882396914
13	674	3	882396955
13	675	5	882396955
13	679	4	882397650
13	684	5	882397271
13	686	5	882397146
13	687	1	883670705
13	688	1	883670819
13	689	2	881515735
13	690	3	881514811
13	691	4	889316404
13	692	4	882141659
13	706	1	882396869
13	709	4	882139863
13	712	4	882141872
13	722	3	882399528
13	732	5	882141617
13	733	5	882399528
13	736	4	882399528
13	737	4	882399615
13	739	4	886303745
13	740	1	882140355
13	746	3	884538766
13	747	4	882140624
13	748	4	882140792
13	749	3	881515521
13	750	5	883670552
13	751	5	882774081
13	754	4	882140718
13	756	2	886302858
13	757	3	882398934
13	758	1	882397084
13	760	1	882396914
13	761	4	882398076
13	762	5	882141336
13	763	1	882141458
13	765	2	886303934
13	767	1	882397011
13	768	4	882398724
13	769	3	882397040
13	770	4	882397581
13	771	3	882398410
13	773	1	882396869
13	774	1	882396913
13	775	4	886304188
13	777	1	882397084
13	778	3	886302694
13	779	3	882398255
13	785	3	882141924
13	789	5	882140389
13	790	2	882141841
13	791	5	882141686
13	792	5	882139686
13	793	5	882141841
13	795	2	882399219
13	796	3	886304188
13	797	5	882398327
13	798	2	882397974
13	799	4	882139937
13	800	1	882397067
13	801	3	886303172
13	803	3	882398255
13	804	2	882141997
13	806	5	882140426
13	810	5	882398076
13	811	5	882139829
13	813	1	882139863
13	815	4	886303934
13	817	1	882396914
13	818	3	882141814
13	819	1	882141924
13	822	3	884538634
13	824	3	886302261
13	825	1	882397651
13	826	5	882398385
13	827	3	882398327
13	829	3	882398385
13	832	4	882399156
13	833	2	882397974
13	834	1	882397068
13	835	3	882139901
13	837	4	882139717
13	838	1	882397742
13	841	1	882398076
13	843	5	882399156
13	845	3	882141503
13	846	2	882141997
13	849	1	882397833
13	850	4	882140318
13	851	5	882139966
13	853	1	882397010
13	855	4	882140130
13	862	3	882399074
13	863	4	882140487
13	865	5	882141425
13	867	5	882399615
13	870	3	882397271
13	871	2	882141924
13	872	3	882139327
13	873	1	881515565
13	879	2	881515697
13	880	3	882140966
13	881	2	881514876
13	882	3	886952438
13	883	3	882140848
13	884	2	882140814
13	886	5	881515613
13	889	3	892015236
13	891	1	892015288
13	893	3	882774005
13	895	1	883670515
13	896	5	891036745
13	897	1	886952422
13	899	1	892015288
13	900	5	888279677
13	902	3	891749765
13	903	3	890704759
13	904	1	892015178
13	905	2	886302261
13	909	5	890704721
13	911	2	892015141
13	914	2	892870589
13	916	4	892870589
13	917	4	892015104
14	12	5	890881216
14	19	5	880929651
14	25	2	876965165
14	32	5	890881485
14	81	5	890881384
14	96	4	890881433
14	124	5	876964936
14	127	2	879644647
14	173	4	879119579
14	186	4	879119497
14	191	4	890881557
14	195	5	890881336
14	210	5	879119739
14	222	4	876965061
14	238	5	879119579
14	240	5	880929697
14	265	3	890881216
14	276	4	879119390
14	288	4	876964936
14	302	5	890880970
14	319	1	884482684
14	382	5	879119739
14	427	5	890881433
14	428	4	879119497
14	430	5	879119692
14	473	5	876964936
14	507	4	890881521
14	523	4	879119497
14	524	5	879119497
14	525	5	890881557
14	588	4	890881433
14	628	5	880929697
14	654	4	890881294
14	663	5	879119651
14	750	3	891014196
14	762	3	876964936
14	820	3	882839856
14	919	4	876964725
14	920	4	880929745
14	921	5	890881384
14	923	5	890881294
15	13	1	879455940
15	14	4	879455659
15	15	4	879455939
15	50	5	879455606
15	111	4	879455914
15	118	1	879456381
15	121	3	879456168
15	125	5	879456049
15	181	5	879455710
15	220	4	879456262
15	225	3	879456447
15	235	1	879456424
15	237	3	879455871
15	243	1	879455362
15	248	1	879455871
15	249	1	879455764
15	251	2	879455541
15	252	2	879456351
15	255	5	879455764
15	257	4	879455821
15	258	3	879455473
15	269	5	879455165
15	275	4	879455562
15	280	3	879456167
15	282	3	879456204
15	283	4	879455505
15	285	4	879455635
15	291	3	879456084
15	292	5	879455128
15	297	3	879455606
15	302	4	879455049
15	303	3	879455080
15	306	5	879455165
15	308	5	879455334
15	310	4	879455049
15	322	3	879455262
15	323	1	879455311
15	328	3	879455192
15	333	1	879455128
15	409	3	879456324
15	455	1	879455914
15	472	3	879456204
15	546	2	879456324
15	676	4	879455871
15	690	4	879455128
15	748	3	879455262
15	823	2	879456351
15	845	2	879456108
15	866	4	879456288
15	879	3	879455311
15	925	2	879455764
15	926	1	879456424
15	927	4	879456381
15	928	1	879456404
15	930	2	879456381
15	931	1	879456507
15	934	4	879456507
15	935	3	879455710
15	936	5	879455889
15	938	3	879455233
16	1	5	877717833
16	4	5	877726390
16	11	5	877718755
16	12	5	877718168
16	15	5	877722001
16	33	2	877722001
16	39	5	877720118
16	58	4	877720118
16	66	4	877719075
16	71	5	877721071
16	79	5	877727122
16	87	4	877720916
16	95	5	877728417
16	98	5	877718107
16	100	5	877720437
16	109	4	877719333
16	125	3	877726944
16	127	5	877719206
16	135	4	877720916
16	143	5	877727192
16	152	4	877728417
16	158	4	877727280
16	172	5	877724726
16	180	5	877726790
16	199	5	877719645
16	200	5	877722736
16	202	5	877724726
16	204	5	877722736
16	208	5	877727054
16	216	5	877722736
16	227	5	877727193
16	234	5	877720185
16	237	5	877719504
16	240	4	877724603
16	273	5	877722736
16	282	5	877718755
16	286	2	877716993
16	302	5	877716993
16	321	3	877717116
16	367	3	877726390
16	385	5	877727192
16	404	5	877728417
16	410	5	877718107
16	423	5	877721142
16	427	5	877722001
16	448	5	877722736
16	467	5	877720733
16	469	3	877720916
16	476	3	877720437
16	480	5	877720297
16	498	5	877719333
16	502	4	877723670
16	509	2	877720118
16	510	4	877727280
16	531	5	877722736
16	583	4	877720186
16	591	4	877726944
16	642	5	877719075
16	661	4	877726789
16	684	5	877719863
16	732	5	877726944
16	770	3	877724979
16	939	4	877717833
16	941	1	877720437
16	943	3	877719206
16	945	4	877719158
16	946	5	877724727
16	947	4	877719454
16	948	3	877717397
17	7	4	885272487
17	100	4	885272520
17	111	3	885272674
17	117	3	885272724
17	126	4	885272724
17	137	4	885272606
17	150	5	885272654
17	221	2	885272654
17	222	3	885272751
17	243	1	885166209
17	269	4	885165619
17	276	4	885272654
17	286	3	885165619
17	294	4	885166209
17	323	1	885166256
17	471	2	885272779
17	475	4	885272520
17	628	1	885272724
17	919	4	885272696
18	4	3	880132150
18	6	5	880130764
18	8	5	880130802
18	9	5	880130550
18	15	4	880131054
18	22	5	880130640
18	23	4	880130065
18	28	3	880129527
18	32	2	880132129
18	42	3	880130713
18	45	5	880130739
18	48	4	880130515
18	50	4	880130155
18	52	5	880130680
18	56	5	880129454
18	59	4	880132501
18	60	4	880132055
18	61	4	880130803
18	65	5	880130333
18	66	3	880131728
18	72	3	880132252
18	79	4	880131450
18	81	3	880130890
18	83	5	880129877
18	88	3	880130890
18	91	3	880130393
18	94	3	880131676
18	95	4	880131297
18	98	5	880129527
18	100	5	880130065
18	111	3	880131631
18	116	5	880131358
18	125	3	880131004
18	127	5	880129668
18	132	5	880132437
18	133	5	880130713
18	134	5	880129877
18	137	5	880132437
18	142	4	880131173
18	143	4	880131474
18	153	4	880130551
18	157	3	880131849
18	165	4	880129527
18	166	4	880129595
18	168	3	880130431
18	172	3	880130551
18	174	4	880130613
18	175	4	880130431
18	177	3	880131297
18	178	3	880129628
18	187	5	880130393
18	189	5	880129816
18	197	4	880130109
18	198	3	880130613
18	200	3	880131775
18	204	3	880131407
18	208	4	880131004
18	210	5	880131054
18	211	5	880131358
18	212	5	880129990
18	213	5	880131201
18	216	4	880129527
18	221	5	880129816
18	223	5	880129731
18	236	3	880131077
18	238	5	880132437
18	242	5	880129305
18	269	5	880129305
18	283	5	880130551
18	284	3	880131804
18	285	5	880130333
18	287	4	880131144
18	317	5	880131144
18	319	4	880129305
18	357	4	880129421
18	378	3	880131804
18	381	4	880131474
18	382	3	880129595
18	386	2	880131986
18	392	3	880130193
18	402	3	880132225
18	403	3	880132103
18	404	4	880132055
18	411	3	880131986
18	414	4	880131054
18	416	5	880131144
18	418	3	880130515
18	419	3	880131878
18	425	3	880130713
18	427	5	880129421
18	430	4	880130155
18	434	3	880131297
18	435	4	880130890
18	461	4	880130713
18	474	4	880129731
18	476	3	880132399
18	478	5	880129691
18	480	4	880129595
18	482	5	880130582
18	486	3	880131559
18	489	4	880129769
18	492	4	880131054
18	493	5	880132437
18	504	5	880129940
18	510	4	880130680
18	512	5	880131407
18	516	5	880130861
18	517	2	880129388
18	519	4	880129991
18	520	4	880129595
18	524	4	880129816
18	528	4	880129489
18	529	5	880130515
18	549	4	880131173
18	582	5	880131450
18	588	4	880131201
18	603	3	880129388
18	604	5	880129731
18	612	4	880131591
18	613	5	880129769
18	614	4	880130861
18	627	3	880131931
18	631	5	880129691
18	633	5	880131358
18	639	4	880131407
18	649	3	880131591
18	654	4	880130110
18	663	4	880129454
18	702	3	880131407
18	704	3	880131986
18	707	3	880131450
18	708	3	880129595
18	709	5	880131028
18	714	4	880130334
18	716	5	880131676
18	724	4	880132055
18	735	4	880130582
18	736	4	880131028
18	737	3	880132055
18	747	3	880132225
18	753	4	880129816
18	762	3	880132103
18	781	3	880132188
18	805	4	880131358
18	845	3	880131236
18	856	5	880131676
18	949	3	880131559
18	951	3	880129595
18	952	2	880130582
18	956	5	880131525
18	957	3	880132188
18	958	5	880129731
18	959	3	880131450
18	962	4	880131631
18	963	5	880132437
18	967	3	880131901
18	969	3	880131106
18	972	3	880130515
18	973	3	880129595
19	8	5	885412723
19	202	4	885412723
19	210	3	885412840
19	211	4	885412840
19	268	2	885412034
19	288	3	885411840
19	294	3	885412034
19	319	4	885411465
19	325	4	885412251
19	887	4	885411465
20	15	4	879667937
20	22	5	879669339
20	50	3	879667937
20	82	4	879669697
20	94	2	879669954
20	143	3	879669040
20	148	5	879668713
20	151	3	879668555
20	174	4	879669087
20	181	4	879667904
20	204	3	879670039
20	210	4	879669065
20	243	4	879667799
20	274	4	879668248
20	323	4	879667684
20	357	1	879669244
20	378	3	879669630
20	423	2	879669313
20	496	5	879669244
20	498	3	879669001
20	588	4	879669120
20	633	4	879668979
20	763	1	879668476
20	820	2	879668626
20	866	1	879668583
20	934	4	879668783
21	1	5	874951244
21	5	2	874951761
21	7	5	874951292
21	9	5	874951188
21	15	4	874951188
21	17	4	874951695
21	50	3	874951131
21	53	4	874951820
21	123	4	874951382
21	127	5	874951188
21	145	1	874951761
21	185	5	874951658
21	200	5	874951695
21	201	5	874951658
21	240	4	874951245
21	243	2	874951039
21	244	4	874951349
21	259	2	874951005
21	260	2	874950972
21	261	1	874951006
21	262	4	874950931
21	263	1	874951040
21	264	3	874950972
21	273	4	874951349
21	281	2	874951416
21	286	3	874950889
21	289	3	874950972
21	300	3	874950889
21	301	4	874951054
21	321	3	874950972
21	322	3	874951005
21	323	2	874950972
21	330	4	874951040
21	358	3	874951616
21	379	3	874951820
21	406	1	874951293
21	408	5	874951188
21	413	2	874951293
21	436	4	874951858
21	437	1	874951858
21	438	1	874951858
21	443	4	874951761
21	444	3	874951859
21	453	2	874951797
21	547	2	874951292
21	551	3	874951898
21	559	1	874951761
21	561	1	874951761
21	563	2	874951898
21	564	3	874951797
21	567	2	874951858
21	573	2	874951898
21	619	2	874951416
21	628	3	874951616
21	635	4	874951727
21	637	4	874951695
21	656	5	874951797
21	669	1	874951761
21	672	3	874951727
21	674	2	874951897
21	675	5	874951897
21	680	1	874950972
21	706	2	874951695
21	748	1	874950889
21	760	1	874951293
21	767	1	874951314
21	769	1	874951916
21	800	1	874951727
21	817	3	874951695
21	853	5	874951658
21	854	5	874951657
21	858	1	874951858
21	872	2	874950889
21	873	2	874950932
21	874	2	874951005
21	876	2	874950932
21	877	2	874950972
21	878	2	874951039
21	925	2	874951447
21	975	3	874951447
21	976	1	874951483
21	978	1	874951483
21	980	2	874951349
21	981	2	874951382
21	983	2	874951416
21	984	1	874951040
21	986	1	874951482
21	987	3	874951616
21	988	1	874951005
21	989	3	874951039
21	990	2	874951039
21	991	2	874951039
21	992	2	874951349
21	993	4	874951245
21	994	2	874951104
22	2	2	878887925
22	4	5	878886571
22	17	4	878886682
22	21	4	878886750
22	24	5	878888026
22	50	5	878887765
22	53	3	878888107
22	62	4	878887925
22	68	4	878887925
22	85	5	878886989
22	89	5	878887680
22	94	3	878887277
22	105	1	878887347
22	109	4	878886710
22	127	5	878887869
22	144	5	878887680
22	161	4	878887925
22	163	1	878886845
22	167	3	878887023
22	174	5	878887765
22	175	4	878886682
22	181	5	878887765
22	184	5	878887869
22	187	5	878887680
22	201	4	878886449
22	202	5	878886480
22	209	4	878886518
22	210	3	878886479
22	211	3	878886518
22	216	4	878886682
22	228	4	878887810
22	229	2	878887925
22	231	2	878887983
22	233	3	878888066
22	250	5	878888251
22	265	3	878888066
22	290	5	878886607
22	367	1	878886571
22	384	3	878887413
22	385	4	878887869
22	405	1	878888067
22	430	4	878886607
22	431	4	878888026
22	449	1	878888145
22	451	4	878887062
22	515	5	878887869
22	523	5	878886845
22	526	4	878888026
22	546	3	878888107
22	566	3	878888145
22	568	4	878887810
22	636	3	878888106
22	651	4	878887810
22	665	1	878888145
22	684	3	878887983
22	688	1	878886307
22	712	4	878887186
22	731	3	878887116
22	732	4	878886710
22	792	4	878886647
22	840	4	878888184
22	862	1	878886845
22	926	1	878887062
22	932	1	878887277
22	988	1	878887116
22	996	1	878887158
22	998	1	878886571
22	1000	3	878886333
22	1002	1	878887186
22	1003	1	878887277
23	7	4	874784385
23	8	4	874785474
23	14	4	874784440
23	19	4	874784466
23	55	4	874785624
23	56	4	874785233
23	59	4	874785526
23	62	3	874786880
23	73	3	874787016
23	79	4	874785957
23	82	3	874787449
23	89	5	874785582
23	91	4	884550049
23	95	4	874786220
23	96	4	874785551
23	100	5	874784557
23	102	3	874785957
23	116	5	874784466
23	124	5	874784440
23	131	4	884550021
23	132	4	874785756
23	134	4	874786098
23	144	3	874785926
23	145	3	874786244
23	151	3	874784668
23	153	4	874786438
23	154	3	874785552
23	155	3	874787059
23	156	3	877817091
23	161	2	874787017
23	162	3	874786950
23	171	5	874785809
23	173	5	874787587
23	174	4	874785652
23	175	5	874785526
23	176	3	874785843
23	181	4	874784337
23	185	4	874785756
23	194	4	874786016
23	195	4	874786993
23	202	3	874785165
23	203	4	874786746
23	204	3	874786122
23	211	4	874786512
23	214	3	874785701
23	216	4	874787204
23	217	2	874787144
23	224	5	874784638
23	227	3	874787738
23	230	4	874785809
23	234	2	874785624
23	235	1	874784712
23	250	4	874784338
23	275	5	874785474
23	283	4	874784575
23	294	1	876785901
23	367	4	874785957
23	386	4	874789001
23	387	3	874786098
23	408	5	874784538
23	414	3	874785526
23	418	4	874786037
23	423	3	874786488
23	432	4	884550048
23	433	5	874785233
23	449	2	874787083
23	451	2	874787256
23	472	2	874784972
23	479	5	874785728
23	522	4	874785447
23	526	3	874787116
23	530	4	874789279
23	541	4	876785720
23	588	4	884550021
23	597	3	874785024
23	603	4	874785448
23	629	4	874786098
23	642	3	874785843
23	652	4	874785926
23	655	3	874787330
23	679	3	874788443
23	694	4	884550049
23	713	4	874784337
23	780	1	874788388
23	856	4	874787288
23	919	5	874784440
23	961	5	874785165
23	1004	3	874788318
24	7	4	875323676
24	8	5	875323002
24	11	5	875323100
24	12	5	875323711
24	41	5	875323594
24	55	5	875323308
24	58	3	875323745
24	69	5	875323051
24	71	5	875323833
24	79	4	875322796
24	92	5	875323241
24	97	4	875323193
24	98	5	875323401
24	127	5	875323879
24	132	3	875323274
24	151	5	875322848
24	173	5	875323474
24	176	5	875323595
24	180	5	875322847
24	200	5	875323440
24	223	5	875322727
24	237	4	875323002
24	238	5	875323274
24	249	4	875246216
24	276	5	875322951
24	288	3	875245985
24	289	3	875245985
24	300	4	875245985
24	324	5	875322875
24	357	5	875323100
24	402	4	875323308
24	421	5	875323712
24	486	3	875322908
24	518	4	875323552
24	582	4	875323368
24	655	5	875323915
24	699	3	875323051
24	727	3	875322727
24	729	5	875323475
24	919	3	875246185
24	1007	5	875322758
25	1	5	885853415
25	7	4	885853155
25	23	4	885852529
25	79	4	885852757
25	82	4	885852150
25	86	4	885852248
25	98	5	885853415
25	116	4	885853335
25	121	4	885853030
25	125	5	885852817
25	131	4	885852611
25	133	3	885852381
25	134	4	885852008
25	141	4	885852720
25	143	3	885852529
25	173	4	885852969
25	176	4	885852862
25	177	3	885852488
25	183	4	885852008
25	186	4	885852569
25	195	4	885852008
25	204	5	885853415
25	265	4	885853415
25	404	3	885852920
25	408	5	885852920
25	419	4	885852218
25	430	4	885852920
25	463	4	885852529
25	474	4	885852008
25	479	5	885852569
25	495	4	885852862
25	527	4	885852248
25	568	4	885852529
25	604	4	885852008
25	612	4	885852120
25	655	4	885852248
25	657	4	885852720
25	692	4	885852656
25	837	4	885852611
25	929	4	885852178
25	968	4	885852218
26	1	3	891350625
26	14	3	891371505
26	24	3	891377540
26	50	4	891386368
26	109	3	891376987
26	111	3	891371437
26	116	2	891352941
26	118	3	891385691
26	121	3	891377540
26	122	1	891380200
26	126	4	891371676
[truncated: 78,000 more rows]
