# Supplementary material
Source: ML conference proceedings conference paper supplement (https://proceedings.neurips.cc/paper_files/paper/2022/hash/01ecd39ca49ddecc5729ca996304781b-Abstract.html)
Supplement: Supplementary file 1 [file 01ecd39ca49ddecc5729ca996304781b-Supplemental-Conference.zip › supplementary NEURIPS 2022/CODE_supplementary/data/ml-100k/u1.test]

1	6	5	887431973
1	10	3	875693118
1	12	5	878542960
1	14	5	874965706
1	17	3	875073198
1	20	4	887431883
1	23	4	875072895
1	24	3	875071713
1	27	2	876892946
1	31	3	875072144
1	33	4	878542699
1	36	2	875073180
1	39	4	875072173
1	44	5	878543541
1	47	4	875072125
1	49	3	878542478
1	51	4	878543275
1	53	3	876893206
1	54	3	878543308
1	56	4	875072716
1	60	5	875072370
1	61	4	878542420
1	62	3	878542282
1	64	5	875072404
1	65	4	875072125
1	67	3	876893054
1	69	3	875072262
1	70	3	875072895
1	72	4	878542678
1	73	3	876892774
1	74	1	889751736
1	76	4	878543176
1	78	1	878543176
1	80	4	876893008
1	81	5	875072865
1	82	5	878542589
1	84	4	875072923
1	85	3	875073180
1	86	5	878543541
1	90	4	878542300
1	91	5	876892636
1	92	3	876892425
1	96	5	875072716
1	97	3	875073128
1	98	4	875072404
1	100	5	878543541
1	102	2	889751736
1	103	1	878542845
1	104	1	875241619
1	107	4	875241619
1	108	5	875240920
1	112	1	878542441
1	113	5	878542738
1	114	5	875072173
1	117	3	874965739
1	118	3	875071927
1	120	1	875241637
1	121	4	875071823
1	125	3	878542960
1	128	4	875072573
1	129	5	887431908
1	130	3	875072002
1	132	4	878542889
1	134	4	875073067
1	140	1	878543133
1	143	1	875072631
1	145	2	875073067
1	148	2	875240799
1	150	5	876892196
1	151	4	875072865
1	154	5	878543541
1	155	2	878542201
1	157	4	876892918
1	159	3	875073180
1	160	4	875072547
1	161	4	875072303
1	163	4	875072442
1	164	3	876893171
1	170	5	876892856
1	171	5	889751711
1	174	5	875073198
1	175	5	875072547
1	177	5	876892701
1	180	3	875072573
1	183	5	875072262
1	184	4	875072956
1	185	4	875072631
1	186	4	875073128
1	188	3	875073128
1	189	3	888732928
1	190	5	875072125
1	193	4	876892654
1	196	5	874965677
1	200	3	876893098
1	201	3	878542960
1	202	5	875072442
1	206	4	876893205
1	208	5	878542960
1	209	4	888732908
1	210	4	878542909
1	212	4	875072895
1	213	2	876892896
1	214	4	875072520
1	215	3	876893145
1	218	3	876892856
1	219	1	878542327
1	221	5	887431921
1	222	4	878873388
1	224	5	875071484
1	225	2	878542738
1	226	3	878543176
1	227	4	876892946
1	228	5	878543541
1	229	4	878542075
1	230	4	878542420
1	232	3	878543196
1	233	2	878542552
1	235	5	875071589
1	236	4	875071898
1	241	4	878543133
1	242	5	889751633
1	243	1	875241390
1	248	4	874965954
1	250	4	874965706
1	252	2	875240677
1	253	5	874965970
1	254	1	878541392
1	255	2	885345822
1	258	5	878873389
1	259	1	875692979
1	260	1	875071713
1	262	3	875071421
1	264	2	875071713
1	265	4	878542441
1	266	1	885345728
1	267	4	875692955
1	272	3	887431647
2	13	4	888551922
2	19	3	888550871
2	50	5	888552084
2	251	5	888552084
2	257	4	888551062
2	279	4	888551745
2	280	3	888551441
2	281	3	888980240
2	290	3	888551441
2	292	4	888550774
2	297	4	888550871
2	298	3	888551441
2	299	4	888550774
2	301	4	888550631
2	303	4	888550774
2	307	3	888550066
2	308	3	888979945
2	312	3	888550631
2	313	5	888552084
2	314	1	888980085
2	315	1	888550774
2	316	5	888979693
3	245	1	889237247
3	264	2	889237297
3	272	2	889237055
3	294	2	889237224
3	299	3	889237199
3	300	2	889236939
3	307	3	889237224
3	318	4	889237482
3	323	2	889237269
3	324	2	889237247
3	327	4	889237455
3	328	5	889237455
3	330	2	889237297
3	331	4	889237455
3	332	1	889237224
3	334	3	889237122
3	335	1	889237269
3	337	1	889236983
3	341	1	889237055
3	343	3	889237122
3	345	3	889237004
3	348	4	889237455
3	349	3	889237269
3	350	3	889237076
3	351	3	889237315
3	354	3	889237004
4	50	5	892003526
4	260	4	892004275
4	264	3	892004275
4	288	4	892001445
4	294	5	892004409
4	303	5	892002352
4	354	5	892002353
4	356	3	892003459
4	357	4	892003525
4	361	5	892002353
5	1	4	875635748
5	2	3	875636053
5	17	4	875636198
5	24	4	879198229
5	40	4	879198109
5	42	5	875636360
5	62	4	875637575
5	69	1	875721555
5	79	3	875635895
5	80	2	875636511
5	89	5	875636033
5	90	3	875636297
5	94	3	878844651
5	98	3	875720691
5	100	5	875635349
5	102	3	875721196
5	109	5	875635350
5	110	1	875636493
5	139	3	875721260
5	143	3	875636815
5	144	3	875636141
5	153	5	875636375
5	154	3	875636691
5	167	2	875636281
5	173	4	875636675
5	176	3	875635962
5	185	3	875720692
5	209	5	875636571
5	211	4	875636631
5	214	3	875637485
5	219	3	875720744
5	222	4	875635174
5	225	2	875635723
5	227	4	875636099
5	230	3	875636070
5	231	2	875635947
5	234	2	875720692
5	241	1	875720948
5	243	1	878844164
5	259	1	878844208
5	267	4	875635064
5	363	3	875635225
5	364	1	875636571
5	369	1	875635372
5	370	1	875720814
5	372	3	875636230
5	376	2	879198045
5	377	1	878844615
5	379	3	875720814
5	382	5	875636587
5	384	3	875636389
5	385	4	875636185
5	388	2	879198898
5	389	1	875721315
5	391	4	875636167
5	393	2	875636265
5	394	2	879198031
5	397	2	875635907
5	400	1	878844630
5	402	1	875720947
5	403	3	875636152
5	407	3	875635431
5	410	1	879198183
5	411	1	875635431
5	413	3	875635807
5	417	3	875636830
5	418	3	875721216
5	421	1	875721019
5	422	4	875636767
5	423	4	875636793
5	424	1	875635807
5	426	3	878844510
5	428	5	875636588
5	429	3	875637429
5	433	5	875636655
5	435	4	875636033
5	436	5	875720717
5	439	1	878844423
5	441	1	875720830
5	444	2	875720762
5	445	3	875720744
5	453	1	879198898
5	454	1	875721432
5	457	1	879198898
6	14	5	883599249
6	15	3	883599302
6	19	4	883602965
6	23	4	883601365
6	28	2	883603013
6	32	4	883601311
6	56	4	883601277
6	59	5	883601713
6	69	3	883601277
6	70	3	883601427
6	81	4	883602283
6	86	3	883603013
6	87	4	883602174
6	95	2	883602133
6	98	5	883600680
6	100	5	883599176
6	117	2	883599431
6	124	5	883599228
6	125	3	883599670
6	131	5	883602048
6	133	4	883601459
6	134	5	883602283
6	135	5	883600747
6	136	5	883600842
6	143	2	883601053
6	151	3	883599558
6	154	3	883602730
6	156	3	883602212
6	175	4	883601426
6	180	4	883601311
6	183	4	883601311
6	187	4	883600914
6	188	3	883602462
6	189	3	883601365
6	193	3	883601529
6	195	4	883602283
6	197	5	883601203
6	199	4	883601203
6	204	3	883601277
6	205	3	883600878
6	208	4	883602422
6	209	4	883601713
6	211	5	883601155
6	213	4	883602462
6	221	4	883599431
6	238	5	883601713
6	248	3	883598981
6	258	2	883268278
6	269	4	883268222
6	275	4	883599102
6	276	2	883599134
6	284	2	883599590
6	286	2	883268170
6	294	2	883599938
6	297	3	883599134
6	301	2	883600406
6	304	4	883268322
6	318	4	883600985
6	357	4	883602422
6	423	3	883602501
6	432	4	883601713
6	458	1	883599914
6	459	2	883599228
6	463	4	883601713
6	466	4	883602422
6	467	4	883602284
6	469	5	883601155
6	470	3	883602690
6	471	2	883599558
6	475	5	883599478
6	476	1	883600175
6	477	1	883599509
6	478	4	883602762
6	479	5	883601053
6	480	4	883601089
6	481	5	883600914
6	483	5	883601500
6	484	5	883601011
6	486	4	883601427
6	487	5	883600785
6	488	5	883601426
6	492	5	883601089
6	498	4	883601053
6	499	4	883602283
6	500	4	883601277
6	506	4	883602174
6	508	3	883599530
6	509	4	883602664
6	511	5	883601393
6	513	4	883600913
6	515	4	883599273
6	517	4	883602212
6	518	3	883603042
6	521	4	883601277
6	523	5	883601528
6	524	3	883600632
6	525	5	883601203
6	526	3	883602596
6	528	4	883602174
6	532	3	883600066
6	534	4	883599354
7	7	5	891352220
7	8	5	891351328
7	10	4	891352864
7	22	5	891351121
7	28	5	891352341
7	32	4	891350932
7	44	5	891351728
7	53	5	891354689
7	54	3	892132380
7	72	5	891353977
7	78	3	891354165
7	79	4	891352261
7	81	5	891352626
7	82	3	891351471
7	89	5	891351082
7	90	3	891352984
7	92	5	891352010
7	93	5	891351042
7	101	5	891350966
7	106	4	891353892
7	118	2	891353411
7	121	5	891352904
7	126	3	891353254
7	127	5	891351728
7	131	5	891352383
7	133	5	891353192
7	136	5	891351813
7	139	3	891354729
7	142	3	891354090
7	151	4	891352749
7	153	5	891352220
7	154	5	891353124
7	156	5	891351653
7	161	3	891352489
7	162	5	891353444
7	163	4	891353444
7	166	3	891351585
7	168	5	891351509
7	171	3	891351287
7	172	4	891350965
7	174	5	891350757
7	176	3	891350782
7	177	4	891352904
7	181	3	891351287
7	182	4	891350965
7	183	4	891351624
7	185	5	892135346
7	188	5	891352778
7	190	5	891351728
7	191	5	891351201
7	193	5	892135346
7	195	5	891352626
7	196	5	891351432
7	200	5	891353543
7	203	5	891352178
7	205	5	891351585
7	207	4	891352526
7	208	5	891352220
7	210	4	891352904
7	212	1	891353051
7	223	5	891351328
7	226	5	891353614
7	227	3	892132317
7	228	4	891350845
7	232	3	891353766
7	241	4	891354053
7	259	3	891350464
7	260	1	892130982
7	264	4	891350703
7	266	4	891350703
7	268	3	891350703
7	269	3	891349991
7	273	3	891351547
7	281	3	891353710
7	285	5	891351813
7	288	4	891350703
7	300	4	891350703
7	307	5	891350703
7	334	5	892130784
7	378	5	891353011
7	382	4	891352093
7	385	5	891351585
7	389	4	891354090
7	393	4	891352058
7	396	4	891354288
7	399	4	891354357
7	401	4	891354257
7	404	5	891352947
7	418	4	892131824
7	420	5	891353219
7	423	5	891351509
7	428	5	892133036
7	430	3	891352178
7	431	4	891351547
7	432	4	891352831
7	435	5	891350845
7	448	3	891353828
7	450	4	892132425
7	451	5	891353892
7	455	4	891353086
7	461	4	891352303
7	471	4	891352864
7	472	2	891353357
7	479	4	891352010
7	480	4	891352093
7	481	5	891352341
7	482	3	891351083
7	483	4	891351851
7	484	5	891351201
7	485	5	891351851
7	489	3	891353477
7	491	5	891351432
7	492	5	891352010
7	495	5	891351328
7	496	5	891351083
7	497	4	891352134
7	498	5	891351814
7	501	5	891353411
7	504	5	891352384
7	505	3	891352341
7	511	5	891351624
7	514	2	891351121
7	515	3	891350757
7	519	4	891352831
7	520	5	892133466
7	526	5	891351042
7	528	5	891352659
7	530	5	891350900
7	537	3	891352749
7	541	2	891354662
7	542	4	892131849
7	543	3	891351772
7	548	5	891352692
7	550	4	891352489
7	553	3	892134010
7	554	3	891354639
7	555	4	892134811
7	559	5	891354882
7	560	3	892132798
7	562	5	891354053
7	563	2	892131978
7	564	3	891354471
7	567	1	892132019
7	570	3	891354639
7	576	5	892132943
7	579	4	892133361
7	580	3	892132171
7	581	5	891353477
7	582	5	892135347
7	587	4	891353950
7	589	5	891352451
7	599	1	891353860
7	604	3	891351547
7	608	4	891351653
7	614	5	891352489
7	618	4	891350900
7	619	3	891352831
7	621	5	892132773
7	622	4	891352984
7	623	3	891354217
7	624	4	891353892
7	626	5	892132773
7	627	3	891352594
7	630	5	891352341
7	633	5	891351509
7	636	4	891351384
7	637	4	891353570
7	642	3	892132277
7	643	4	891350932
7	644	5	891351685
7	645	4	891353614
7	647	5	891352489
7	648	5	891351653
7	650	3	891350965
7	653	4	891351161
7	654	5	892135347
7	657	4	891351234
7	658	3	891352419
7	659	5	891351161
7	661	5	891351624
7	662	3	892133739
7	667	5	892135347
7	669	1	892132020
7	673	3	891353744
7	674	2	891352659
7	675	5	891352947
7	676	3	891354499
7	680	4	891350703
7	681	1	891350594
7	683	4	891350703
8	7	3	879362287
8	22	5	879362183
8	50	5	879362124
8	56	5	879362183
8	79	4	879362286
8	89	4	879362124
8	127	5	879362123
8	144	5	879362286
8	172	5	879362123
8	176	5	879362233
8	182	5	879362183
8	183	5	879362233
8	188	5	879362356
8	190	4	879362183
8	210	4	879362287
8	258	5	879361482
8	294	3	879361521
8	301	4	879361550
8	338	4	879361873
8	385	1	879362124
8	457	1	879361825
8	511	5	879362183
8	550	3	879362356
8	568	4	879362233
8	651	5	879362123
8	685	4	879362423
8	686	3	879362356
8	687	1	879361825
8	689	4	879361873
9	6	5	886960055
9	286	5	886960055
9	298	5	886960055
9	340	4	886958715
9	479	4	886959343
9	487	5	886960056
9	507	4	886959343
9	521	4	886959343
9	527	3	886959344
9	691	5	886960055
10	1	4	877888877
10	4	4	877889130
10	7	4	877892210
10	13	3	877892050
10	16	4	877888877
10	22	5	877888812
10	48	4	877889058
10	56	5	877886598
10	64	4	877886598
10	98	4	877889261
10	99	5	877889130
10	100	5	877891747
10	124	5	877888545
10	127	5	877886661
10	132	5	877893020
10	133	5	877891904
10	135	5	877889004
10	144	4	877892110
10	155	4	877889186
10	156	4	877886846
10	160	4	877888944
10	164	4	877889333
10	168	4	877888812
10	175	3	877888677
10	176	4	877889130
10	183	5	877893020
10	186	4	877886722
10	191	5	877888613
10	194	4	877886661
10	195	4	877889130
10	199	4	877892050
10	200	5	877889261
10	203	4	877891967
10	218	4	877889261
10	223	5	877888545
10	234	4	877888877
10	269	4	877886162
10	275	4	877888677
10	283	4	877892276
10	285	5	877889186
10	289	4	877886223
10	294	3	879163524
10	321	4	879163494
10	340	4	880371312
10	367	4	877892437
10	371	4	877886912
10	385	4	877886783
10	418	4	877886783
10	420	4	877892438
10	435	5	877889261
10	447	4	877891747
10	461	3	877888944
10	463	4	877889186
10	474	4	877886783
10	475	4	877888545
10	483	5	877889333
10	486	4	877886846
10	488	5	877888613
10	489	4	877892210
10	493	4	877886661
10	495	4	877892160
10	496	5	877889005
10	497	4	877889261
10	498	5	877889333
10	504	5	877892110
10	505	4	877886846
10	509	4	877889005
10	519	5	877892050
10	521	4	877892110
10	558	4	877886722
10	588	4	877886846
10	603	5	877886783
10	611	5	877886722
10	615	4	877892276
10	651	4	877888812
10	652	3	877889130
10	655	5	877891904
10	656	5	877886846
10	657	4	877892110
10	695	3	877892050
10	696	4	877892276
10	698	4	877888877
10	702	3	877886722
10	703	5	877892110
10	704	3	877892050
10	705	4	877892050
10	706	4	877888677
10	710	4	877892160
10	711	4	877888812
10	712	4	877892438
11	9	5	891902970
11	12	2	891904194
11	22	4	891904241
11	38	3	891905936
11	40	3	891905279
11	47	4	891904551
11	51	4	891906439
11	90	2	891905298
11	94	3	891905324
11	97	4	891904300
11	100	4	891902718
11	109	3	891903836
11	110	3	891905324
11	111	4	891903862
11	120	2	891903935
11	135	4	891904335
11	175	3	891904551
11	185	4	891905783
11	190	3	891904174
11	191	4	891904270
11	194	4	891904920
11	203	4	891905856
11	204	3	891904920
11	215	3	891904389
11	216	3	891904949
11	227	3	891905896
11	230	4	891905783
11	241	4	891906389
11	260	1	891902426
11	268	5	891901652
11	277	5	891903226
11	291	4	891902815
11	300	3	891902092
11	312	4	891902157
11	350	4	891901991
11	383	2	891905555
11	395	2	891905349
11	402	4	891904662
11	425	4	891904300
11	428	4	891905032
11	429	5	891904335
11	435	4	891904968
11	455	3	891903862
11	517	2	891905222
11	521	2	891904174
11	524	4	891904949
11	558	3	891904214
11	561	2	891905936
11	573	3	891906327
11	597	2	891904037
11	652	4	891905003
11	660	3	891904573
11	663	4	891905032
11	710	2	891905221
11	713	5	891903024
11	714	4	891904214
11	720	1	891904717
11	721	3	891905279
11	722	3	891905349
11	723	5	891904637
11	725	3	891905568
11	726	3	891905515
11	730	3	891904335
11	732	3	891904596
11	733	4	891904413
11	734	3	891905349
11	735	3	891904300
11	736	4	891906411
11	739	3	891906411
11	740	4	891903067
11	741	5	891902745
11	743	2	891904065
11	744	4	891903005
11	746	4	891905032
11	751	2	891902092
11	752	4	891902157
12	15	5	879959670
12	28	5	879958969
12	50	4	879959044
12	71	4	879959635
12	82	4	879959610
12	96	4	879959583
12	97	5	879960826
12	132	5	879959465
12	143	5	879959635
12	157	5	879959138
12	172	4	879959088
12	191	5	879960801
12	196	5	879959553
12	200	1	879959610
12	204	5	879960826
12	276	4	879959488
12	282	5	879960679
12	300	4	879958639
12	318	5	879960826
12	381	4	879958902
12	402	5	879960826
12	471	5	879959670
12	684	5	879959105
12	735	5	879960826
12	753	5	879960679
12	754	4	879958810
13	2	3	882397650
13	11	1	882397146
13	14	4	884538727
13	21	3	882399040
13	24	1	882397741
13	25	1	882141686
13	27	3	882397833
13	29	2	882397833
13	40	2	886302815
13	42	4	882141393
13	45	3	882139863
13	48	5	882139863
13	56	5	881515011
13	59	4	882140425
13	61	4	882140552
13	64	5	882140037
13	66	3	882141485
13	71	4	882398654
13	72	4	882141727
13	73	3	882141485
13	88	4	882141485
13	90	3	882141872
13	94	3	882142057
13	97	4	882399357
13	98	4	881515011
13	100	5	882140166
13	109	4	882141306
13	118	4	882397581
13	121	5	882397503
13	124	5	884538663
13	137	5	882139804
13	144	4	882397146
13	147	3	882397502
13	150	5	882140588
13	153	4	882139901
13	154	5	882141335
13	161	5	882397741
13	167	4	882141659
13	168	4	881515193
13	173	2	882139863
13	178	4	882139829
13	180	5	882141248
13	181	5	882140354
13	185	3	881515011
13	186	4	890704999
13	190	4	882397145
13	195	3	881515296
13	196	4	882140552
13	198	3	881515193
13	201	1	882396869
13	208	5	882140624
13	210	3	882140455
13	212	5	882399385
13	215	5	882140588
13	217	1	882396955
13	219	1	882396955
13	226	4	882397651
13	229	4	882397650
13	230	3	882397503
13	232	3	890704999
13	238	3	881515411
13	243	3	882140966
13	258	4	882139327
13	261	1	883670785
13	263	5	881515647
13	265	4	882140038
13	268	4	881514810
13	269	2	889292060
13	270	4	881514876
13	271	1	881514876
13	272	4	884538403
13	273	3	882397502
13	276	5	882140104
13	281	3	882397974
13	287	1	882141459
13	289	2	882140759
13	290	4	882141814
13	294	2	881514683
13	300	1	881515736
13	301	1	882140718
13	302	5	881514811
13	303	4	881514876
13	305	4	881514811
13	308	3	881514726
13	312	1	883670630
13	314	1	884538485
13	315	5	884538466
13	317	5	882140552
13	318	3	882139686
13	319	4	882139327
13	320	1	882397010
13	331	3	881515457
13	333	3	881514810
13	334	1	886952467
13	338	1	882140740
13	340	2	881514684
13	341	2	886952422
13	343	1	883670672
13	344	2	888073635
13	345	4	884538366
13	349	1	892387807
13	351	1	886302385
13	353	4	886261450
13	354	2	888779458
13	360	4	882140926
13	363	3	882398076
13	377	1	882399219
13	379	1	882396984
13	384	2	882141814
13	385	3	882397502
13	387	3	886304229
13	391	3	882398255
13	396	3	882141727
13	402	4	886303934
13	405	2	882397742
13	409	3	882141872
13	414	5	882141458
13	416	3	882398934
13	418	2	882398763
13	420	4	882398691
13	421	2	882140389
13	423	5	882398814
13	428	5	882140588
13	431	1	882397271
13	436	2	882396869
13	437	1	882397068
13	440	1	882397040
13	443	4	882140588
13	447	2	882396869
13	449	4	882398385
13	450	3	882398494
13	451	1	882141872
13	452	3	882397039
13	457	1	883670785
13	467	5	882140588
13	472	5	882398327
13	476	2	882141997
13	477	4	882398934
13	480	3	881515193
13	481	3	882140038
13	482	5	882140355
13	483	5	882139774
13	488	3	890704999
13	493	5	882140206
13	498	4	882139901
13	501	5	882398724
13	502	5	882141458
13	505	3	882140389
13	508	3	882140426
13	509	5	882140691
13	514	5	881515112
13	516	5	882141485
13	517	5	882139746
13	519	5	882140355
13	520	4	886302261
13	524	4	886302261
13	526	3	882141053
13	530	5	881515295
13	539	1	883670785
13	540	3	882398410
13	546	3	882397741
13	548	3	882398743
13	564	1	882396913
13	567	1	882396955
13	570	5	882397581
13	588	4	882398763
13	589	3	881515239
13	596	3	882398691
13	597	3	882397650
13	601	4	882140104
13	604	5	882139966
13	610	2	882140690
13	612	4	882140318
13	614	4	884538634
13	615	4	881515348
13	617	3	881515112
13	624	5	882398691
13	625	2	882398691
13	632	3	884538664
13	651	5	882140070
13	652	5	882141458
13	659	3	882141335
13	665	2	882396984
13	673	3	882140691
13	678	3	882140792
13	682	1	883670742
13	683	1	886952521
13	685	5	882397582
13	694	4	890704999
13	705	5	884538766
13	716	4	882141393
13	720	4	882397974
13	735	3	882140690
13	752	1	886952569
13	755	3	882399014
13	759	2	882398542
13	764	2	882141997
13	766	4	882139686
13	772	1	882140070
13	776	2	882398934
13	780	1	882142057
13	781	3	882399528
13	782	3	885744650
13	783	3	886304188
13	784	1	882397084
13	786	3	886303088
13	787	3	882141582
13	788	1	882396914
13	794	4	882399615
13	802	2	882398254
13	805	4	882141458
13	807	1	886304229
13	808	2	882397833
13	809	4	882397582
13	812	2	882398933
13	814	5	886302261
13	816	1	882396983
13	820	4	882398743
13	821	3	882141393
13	823	5	882397833
13	828	1	882399218
13	830	1	882397581
13	831	3	882398385
13	836	2	882139746
13	839	1	882396984
13	840	3	886261387
13	842	2	882399156
13	844	1	882397010
13	847	4	882139937
13	848	5	882140001
13	852	1	882396869
13	854	1	882396914
13	856	5	886303171
13	857	3	881515348
13	858	1	882397068
13	859	1	882397040
13	860	1	882396984
13	861	3	882139774
13	864	4	882141924
13	866	3	882141814
13	868	5	882139901
13	869	3	882141727
13	874	5	881514876
13	875	1	881515613
13	876	2	881515521
13	877	2	882140792
13	878	1	883670785
13	885	1	886302334
13	887	5	882140867
13	888	2	886261388
13	890	1	883670672
13	892	3	882774224
13	894	1	883670742
13	898	1	884538403
13	901	1	883670672
13	906	3	891749765
13	907	1	884538485
13	908	1	886302385
13	910	2	890704721
13	912	2	892014861
13	913	1	892014908
13	915	5	892015023
13	918	3	892524090
14	7	5	876965061
14	9	4	879119260
14	13	4	880929778
14	14	3	879119311
14	15	4	879119390
14	18	3	879119260
14	22	3	890881521
14	23	5	890881216
14	42	4	879119579
14	50	5	890881557
14	56	5	879119579
14	70	1	879119692
14	93	3	879119311
14	98	3	890881335
14	100	5	876965165
14	111	3	876965165
14	116	5	876965165
14	121	3	876965061
14	151	5	876964725
14	168	4	879119497
14	172	5	890881521
14	174	5	890881294
14	175	5	879119497
14	176	1	890881484
14	181	5	889666215
14	202	3	890881521
14	204	5	879119651
14	211	4	879119693
14	213	5	890881557
14	242	4	876964570
14	269	4	892242403
14	275	4	876964725
14	283	4	882839936
14	285	5	879119118
14	313	2	890880970
14	357	2	890881294
14	408	5	879119348
14	455	4	880929745
14	474	4	890881557
14	475	3	876964936
14	477	4	879119311
14	492	4	890881485
14	498	5	890881384
14	509	5	890881521
14	514	4	879119579
14	517	4	890881485
14	519	5	890881335
14	530	5	890881433
14	596	3	879119311
14	603	4	890881484
14	655	5	879119739
14	709	5	879119693
14	716	5	879119651
14	792	5	879119651
14	813	2	880929564
14	845	3	880929564
14	922	4	880929651
15	1	1	879455635
15	7	1	879455506
15	9	4	879455635
15	18	1	879455681
15	20	3	879455541
15	25	3	879456204
15	127	2	879455505
15	137	4	879455939
15	148	3	879456049
15	222	3	879455730
15	244	2	879456447
15	274	4	879456168
15	278	1	879455843
15	286	2	879455049
15	289	3	879455262
15	300	4	879455166
15	301	4	879455233
15	307	1	879455233
15	331	3	879455166
15	405	2	879455957
15	411	2	879456351
15	458	5	879456288
15	459	5	879455562
15	471	4	879456084
15	473	1	879456204
15	476	4	879456404
15	508	2	879455789
15	591	2	879455821
15	620	4	879456204
15	678	1	879455311
15	685	4	879456288
15	696	2	879456262
15	742	2	879456049
15	744	4	879455789
15	749	1	879455311
15	754	5	879455080
15	815	1	879456108
15	864	4	879456231
15	889	3	879455473
15	924	3	879456204
15	929	1	879456168
15	932	1	879456465
15	933	1	879456447
15	937	4	879455128
16	7	5	877724066
16	8	5	877722736
16	9	5	877722736
16	22	5	877721071
16	27	2	877726390
16	28	5	877727122
16	31	5	877717956
16	51	4	877726390
16	55	5	877717956
16	56	5	877719863
16	64	5	877720297
16	69	5	877724846
16	70	4	877720118
16	76	5	877719863
16	89	2	877717833
16	92	4	877721905
16	96	5	877717833
16	99	5	877720733
16	134	4	877719158
16	144	5	877721142
16	151	5	877721905
16	155	3	877719157
16	156	4	877719863
16	160	4	877722001
16	161	5	877726390
16	164	5	877724438
16	168	4	877721142
16	174	5	877719504
16	178	5	877719333
16	182	5	877719863
16	183	5	877720733
16	191	5	877719454
16	194	5	877720733
16	195	5	877720298
16	197	5	877726146
16	209	5	877722736
16	228	5	877720733
16	230	5	877720813
16	233	5	877727054
16	284	1	877719863
16	288	3	877717078
16	294	4	877717116
16	300	5	877717078
16	318	5	877718107
16	357	5	877720297
16	418	5	877724727
16	443	5	877727055
16	447	5	877724066
16	471	3	877724845
16	479	5	877720436
16	482	5	877718872
16	496	5	877721905
16	504	5	877718168
16	546	4	877726944
16	564	1	877726790
16	602	5	877719333
16	603	5	877719206
16	606	4	877721071
16	629	4	877720437
16	654	5	877720298
16	655	5	877724066
16	657	5	877723882
16	692	4	877719158
16	693	4	877721905
16	705	5	877722736
16	735	3	877720186
16	761	2	877727192
16	812	2	877723882
16	940	2	877721236
16	942	4	877719863
16	944	1	877727122
17	1	4	885272579
17	9	3	885272558
17	13	3	885272654
17	125	1	885272538
17	151	4	885272751
17	237	2	885272628
17	245	2	885166209
17	508	3	885272779
17	744	3	885272606
18	1	5	880130802
18	12	5	880129991
18	13	5	880131497
18	14	5	880130431
18	19	3	880130582
18	25	3	880131591
18	26	4	880129731
18	47	3	880131262
18	57	4	880130930
18	58	4	880130613
18	64	5	880132501
18	69	3	880129527
18	70	4	880129668
18	71	4	880131236
18	82	3	880131236
18	86	4	880129731
18	89	3	880130065
18	97	4	880131525
18	99	5	880130829
18	113	5	880129628
18	126	5	880130680
18	131	4	880131004
18	135	3	880130065
18	136	5	880129421
18	151	3	880131804
18	152	3	880130515
18	154	4	880131358
18	162	4	880131326
18	169	5	880130252
18	170	5	880130515
18	179	4	880129877
18	180	4	880130252
18	181	3	880131631
18	182	4	880130640
18	185	3	880129388
18	186	4	880131699
18	188	3	880129388
18	190	4	880130155
18	191	4	880130193
18	193	5	880131358
18	194	3	880129816
18	195	3	880131236
18	196	3	880131297
18	199	3	880129769
18	202	3	880130515
18	209	4	880130861
18	214	4	880132078
18	215	3	880130930
18	224	5	880130739
18	234	3	880131106
18	237	3	880129991
18	241	3	880131525
18	275	5	880129421
18	276	5	880130829
18	286	5	880129305
18	318	5	880132437
18	367	4	880130802
18	387	4	880130155
18	393	3	880130930
18	408	5	880129628
18	423	5	880132437
18	428	3	880131325
18	432	4	880131559
18	443	3	880130193
18	451	3	880131297
18	462	3	880130065
18	463	4	880131143
18	479	4	880129769
18	483	4	880129940
18	485	5	880132437
18	487	4	880129454
18	488	3	880130065
18	494	3	880131497
18	496	5	880130470
18	497	4	880131358
18	498	4	880129940
18	509	4	880129940
18	513	4	880129769
18	514	5	880129990
18	515	5	880130155
18	523	4	880130393
18	526	4	880131407
18	527	4	880130109
18	530	4	880129877
18	602	3	880131407
18	607	3	880131752
18	609	4	880130713
18	610	4	880130861
18	629	3	880130515
18	630	3	880132188
18	647	4	880129595
18	659	4	880129489
18	660	5	880130930
18	692	3	880130930
18	699	5	880130802
18	705	3	880130640
18	729	3	880131236
18	732	3	880131698
18	739	3	880131776
18	775	3	880131878
18	778	2	880131077
18	792	5	880131106
18	794	3	880131878
18	863	3	880130680
18	921	5	880132437
18	923	5	880132501
18	950	3	880130764
18	953	3	880131901
18	954	3	880130640
18	955	4	880130713
18	960	4	880131004
18	961	3	880131830
18	964	3	880132252
18	965	4	880132012
18	966	2	880132399
18	968	3	880130155
18	970	3	880131591
18	971	4	880131878
19	4	4	885412840
19	153	4	885412840
19	201	3	885412839
19	258	4	885411840
19	310	4	885412063
19	313	2	885411792
19	382	3	885412840
19	435	5	885412840
19	655	3	885412723
19	692	3	885412840
20	1	3	879667963
20	11	2	879669401
20	69	1	879668979
20	87	5	879669746
20	95	3	879669181
20	98	3	879669547
20	118	4	879668442
20	121	3	879668227
20	144	2	879669401
20	172	3	879669181
20	176	2	879669152
20	186	3	879669040
20	194	3	879669152
20	208	2	879669401
20	252	4	879669697
20	288	1	879667584
20	405	3	879668555
20	568	4	879669291
20	597	3	879668190
20	678	4	879667684
20	742	4	879668166
20	931	1	879668829
21	56	5	874951658
21	98	5	874951657
21	100	5	874951292
21	103	1	874951245
21	106	2	874951447
21	118	1	874951382
21	121	1	874951416
21	129	4	874951382
21	148	1	874951482
21	164	5	874951695
21	184	4	874951797
21	217	3	874951727
21	218	4	874951696
21	219	5	874951797
21	222	2	874951382
21	234	5	874951657
21	242	3	874951617
21	245	1	874951006
21	258	4	874950889
21	288	3	874950932
21	291	3	874951446
21	292	3	874950889
21	294	3	874951616
21	295	3	874951349
21	298	5	874951382
21	299	1	874950931
21	319	2	874950889
21	320	3	874951658
21	324	4	874950889
21	325	4	874950931
21	326	5	874950889
21	327	3	874950932
21	328	3	874951005
21	370	1	874951293
21	396	2	874951798
21	424	1	874951293
21	439	1	874951820
21	440	1	874951798
21	441	3	874951761
21	445	3	874951658
21	447	5	874951695
21	448	4	874951727
21	452	4	874951727
21	457	1	874951054
21	473	3	874951245
21	558	5	874951695
21	565	3	874951898
21	569	3	874951820
21	590	1	874951898
21	591	3	874951382
21	595	3	874951617
21	596	3	874951617
21	665	3	874951858
21	668	1	874951761
21	670	3	874951696
21	671	5	874951657
21	678	2	874951005
21	687	2	874951005
21	688	1	874950972
21	696	2	874951382
21	717	1	874951483
21	741	3	874951382
21	742	3	874951617
21	758	1	874951314
21	773	3	874951797
21	774	2	874951898
21	816	1	874951898
21	820	3	874951616
21	834	1	874951293
21	839	1	874951797
21	844	4	874951292
21	859	2	874951859
21	860	2	874951727
21	875	4	874951005
21	928	3	874951616
21	930	1	874951482
21	931	2	874951446
21	948	1	874951054
21	974	3	874951416
21	977	2	874951416
21	979	2	874951416
21	982	1	874951482
21	985	2	874951349
21	995	2	874950932
22	29	1	878888228
22	79	4	878887765
22	80	4	878887227
22	96	5	878887680
22	110	1	878887157
22	117	4	878887869
22	118	4	878887983
22	121	3	878887925
22	128	5	878887983
22	153	5	878886423
22	154	4	878886423
22	168	5	878886517
22	172	4	878887680
22	173	5	878886368
22	176	5	878887765
22	186	5	878886368
22	194	5	878886607
22	195	4	878887810
22	204	5	878886607
22	208	5	878886607
22	222	4	878887925
22	226	4	878888145
22	227	4	878888067
22	230	4	878888026
22	238	5	878886423
22	241	3	878888025
22	258	5	878886261
22	294	1	878886262
22	358	5	878887443
22	376	3	878887112
22	377	1	878887116
22	386	3	878887347
22	393	4	878886989
22	399	4	878887157
22	403	5	878887810
22	407	3	878886845
22	411	1	878887277
22	433	3	878886479
22	435	5	878886682
22	455	5	878886479
22	456	1	878887413
22	502	4	878886647
22	510	5	878887765
22	511	4	878887983
22	550	5	878888184
22	554	1	878888066
22	648	4	878886647
22	683	1	878886307
22	687	1	878887476
22	692	4	878886480
22	780	1	878887377
22	791	1	878887227
22	871	3	878886750
22	878	1	878887598
22	948	1	878887553
22	997	1	878887377
22	999	4	878886902
22	1001	1	878886647
23	1	5	874784615
23	13	4	874784497
23	28	3	874786793
23	32	3	874785809
23	50	4	874784440
23	70	2	874786513
23	71	3	874789299
23	83	4	874785926
23	88	3	874787410
23	90	2	874787370
23	98	5	874786016
23	99	4	874786098
23	109	3	874784466
23	133	4	874786220
23	143	3	874786066
23	170	4	874785348
23	172	4	874785889
23	177	4	884550003
23	183	3	874785728
23	188	3	877817151
23	189	5	874785985
23	191	3	877817113
23	196	2	874786926
23	209	5	874785843
23	213	3	874785675
23	215	2	874787116
23	219	1	874788187
23	222	4	876785704
23	228	4	874785582
23	229	3	874787162
23	238	5	874785526
23	257	3	890276940
23	258	5	876785704
23	269	5	877817151
23	315	3	884550320
23	323	2	874784266
23	357	3	874785233
23	380	5	874787774
23	381	4	874787350
23	385	4	874786462
23	404	4	874787860
23	405	4	874784638
23	419	3	874787204
23	421	5	874786770
23	427	5	874789279
23	463	4	874785843
23	483	4	884550048
23	504	4	874785624
23	511	5	874786770
23	512	5	874785843
23	516	4	874787330
23	518	5	874785194
23	527	4	874785926
23	528	4	874786974
23	546	3	874784668
23	549	3	874788290
23	662	3	874788045
23	705	4	874785526
23	710	4	874785889
23	739	2	874787861
23	747	3	874786903
23	1005	3	874787647
23	1006	3	874785809
24	9	5	875323745
24	25	4	875246258
24	56	4	875323240
24	64	5	875322758
24	100	5	875323637
24	109	3	875322848
24	117	4	875246216
24	129	3	875246185
24	153	4	875323368
24	178	5	875323676
24	191	5	875323003
24	216	4	875323745
24	258	4	875245985
24	275	5	875323507
24	286	5	875323773
24	294	3	875246037
24	318	5	875323474
24	358	3	875246012
24	367	2	875323241
24	372	4	875323553
24	427	5	875323002
24	475	4	875246216
24	477	5	875323594
24	508	4	875323833
24	662	5	875323440
24	742	4	875323915
24	763	5	875322875
25	8	4	885852150
25	13	4	885852381
25	25	5	885853415
25	50	5	885852150
25	114	5	885852218
25	127	3	885853030
25	135	3	885852059
25	151	4	885853335
25	169	5	885852301
25	174	5	885853415
25	181	5	885853415
25	189	5	885852488
25	197	3	885852059
25	208	4	885852337
25	222	4	885852817
25	228	4	885852920
25	238	4	885852757
25	239	4	885853415
25	257	4	885853415
25	258	5	885853199
25	269	4	885851953
25	275	4	885853335
25	357	4	885852757
25	427	4	885852059
25	432	2	885852443
25	455	4	885853415
25	477	4	885853155
25	478	5	885852271
25	480	4	885852008
25	498	4	885852086
25	501	3	885852301
25	520	3	885852150
25	615	5	885852611
25	633	4	885852301
25	729	4	885852697
25	742	4	885852569
25	969	3	885852059
26	7	3	891350826
26	9	4	891386369
26	13	3	891373086
26	15	4	891386369
26	25	3	891373727
26	100	5	891386368
26	117	3	891351590
26	125	4	891371676
26	127	5	891386368
26	150	3	891350750
26	235	2	891372429
26	237	3	891351590
26	240	3	891377468
26	255	3	891377609
26	257	3	891371596
26	258	3	891347949
26	269	4	891347478
26	286	3	891347400
26	292	3	891347400
26	294	3	891348192
26	315	3	891347400
26	321	3	891347949
26	322	3	891349122
26	333	3	891348192
26	343	3	891349238
26	410	2	891373086
26	455	3	891371506
26	476	3	891384414
26	508	3	891352941
26	597	2	891379753
26	685	3	891371676
26	742	3	891352492
26	864	2	891383899
26	871	2	891379664
26	926	2	891385692
26	930	2	891385985
26	979	3	891383899
26	1008	3	891377609
26	1009	2	891384478
26	1015	3	891352136
26	1016	3	891377609
27	100	5	891543129
27	121	4	891543191
27	246	4	891542897
27	281	3	891543164
27	295	3	891543164
27	298	4	891543164
27	325	2	891543191
27	370	4	891543245
27	475	2	891542942
27	508	3	891542987
27	515	4	891543009
27	596	2	891542987
27	742	3	891543129
27	925	3	891543245
27	978	2	891543222
28	7	5	881961531
28	12	4	881956853
28	50	4	881957090
28	70	4	881961311
28	79	4	881961003
28	89	4	881961104
28	95	3	881956917
28	98	5	881961531
28	100	5	881957425
28	143	4	881956564
28	145	3	881961904
28	153	3	881961214
28	173	3	881956220
28	174	5	881956334
28	184	4	881961671
28	201	3	881961671
28	209	4	881961214
28	217	3	881961671
28	218	3	881961601
28	222	5	881961393
28	223	5	882826496
28	228	5	881961393
28	234	4	881956144
28	258	5	881955018
28	271	4	881955281
28	282	4	881957425
28	294	3	881954915
28	380	4	881961394
28	423	2	881956564
28	436	5	881961601
28	441	2	881961782
28	450	1	881961394
28	479	4	881961157
28	480	5	881957002
28	568	4	881957147
28	646	4	881961003
28	665	3	881961782
28	678	2	882826550
28	800	4	881961904
28	895	4	882826398
29	98	4	882821942
29	189	4	882821942
29	245	3	882820803
29	259	4	882821044
29	269	4	882820897
29	270	4	882820803
29	294	4	882820730
29	302	4	882820663
29	332	4	882820869
29	343	3	882821673
29	358	2	882821044
29	539	2	882821044
29	678	3	882821582
29	689	2	882821705
29	748	2	882821558
29	874	4	882821020
29	1018	4	882821989
30	7	4	875140648
30	28	4	885941321
30	82	4	875060217
30	181	4	875060217
30	231	2	875061066
30	255	4	875059984
30	286	5	885941156
30	289	2	876847817
30	294	4	875140648
30	301	4	875988577
30	435	5	885941156
30	531	5	885941156
30	538	4	885941798
30	539	3	885941454
30	678	2	885942002
30	688	3	885941492
30	1007	5	885941156
30	1013	3	875060334
31	79	2	881548082
31	124	4	881548110
31	135	4	881548030
31	302	4	881547719
31	321	4	881547746
31	484	5	881548030
31	493	5	881548110
31	498	4	881548111
31	504	5	881548110
31	514	5	881548030
31	682	2	881547834
31	705	5	881548110
31	886	2	881547877
32	100	3	883717662
32	117	3	883717555
32	118	3	883717967
32	122	2	883718250
32	151	3	883717850
32	235	3	883718121
32	245	2	883710047
32	246	4	883717521
32	249	4	883717645
32	250	4	883717684
32	257	4	883717537
32	259	2	883709986
32	276	4	883717913
32	290	3	883717913
32	294	3	883709863
32	591	3	883717581
32	866	3	883718031
32	1012	4	883717581
32	1016	1	883718121
33	258	4	891964066
33	292	4	891964244
33	307	3	891964148
33	313	5	891963290
33	328	4	891964187
33	333	4	891964259
33	343	4	891964344
33	751	4	891964188
33	872	3	891964230
33	895	3	891964187
34	242	5	888601628
34	245	4	888602923
34	259	2	888602808
34	286	5	888602513
34	299	5	888602923
34	310	4	888601628
34	312	4	888602742
34	329	5	888602808
34	332	5	888602742
34	690	4	888602513
35	242	2	875459166
35	243	2	875459046
35	259	4	875459017
35	322	3	875459017
35	332	4	875459237
35	680	4	875459099
35	877	2	875459099
35	1025	3	875459237
36	268	2	882157418
36	269	3	882157258
36	307	4	882157227
36	310	4	882157327
36	319	2	882157356
36	339	5	882157581
36	682	1	882157386
36	748	4	882157285
36	882	5	882157581
36	883	5	882157581
36	885	5	882157581
37	11	4	880915838
37	22	5	880915810
37	24	4	880915674
37	55	3	880915942
37	56	5	880915810
37	79	4	880915810
37	117	4	880915674
37	161	5	880915902
37	176	4	880915942
37	183	4	880930042
37	195	5	880915874
37	222	3	880915528
37	265	4	880930072
37	288	4	880915258
37	363	3	880915711
37	403	5	880915942
37	540	2	880916070
37	597	5	880915607
37	685	3	880915528
37	948	4	880915407
38	1	5	892430636
38	22	5	892429347
38	28	4	892429399
38	67	4	892434312
38	71	5	892430516
38	79	3	892430309
38	82	5	892429903
38	88	5	892430695
38	94	5	892432030
38	95	5	892430094
38	99	5	892430829
38	118	5	892431151
38	122	1	892434801
38	133	2	892429873
38	139	2	892432786
38	140	5	892430309
38	145	1	892433062
38	153	5	892430369
38	161	5	892432062
38	211	1	892431907
38	216	5	892430486
38	218	3	892431871
38	225	5	892433062
38	226	1	892431513
38	234	5	892431607
38	252	5	892429567
38	257	1	892429512
38	318	3	892430071
38	328	4	892428688
38	383	2	892433801
38	384	5	892433660
38	389	5	892433660
38	392	5	892430120
38	393	5	892430282
38	403	1	892432205
38	404	5	892431586
38	419	5	892429347
38	423	5	892430071
38	424	3	892432624
38	432	1	892430282
38	444	1	892433912
38	450	1	892432624
38	465	5	892432476
38	508	2	892429399
38	526	1	892430636
38	550	2	892432786
38	573	1	892433660
38	616	3	892433375
38	672	3	892434800
38	679	5	892432062
38	720	5	892432424
38	758	1	892434626
38	780	4	892434217
38	838	2	892433680
38	916	5	892428188
38	1014	5	892429542
38	1030	5	892434475
38	1034	1	892433062
39	258	4	891400280
39	300	3	891400280
39	306	3	891400342
39	315	4	891400094
39	333	4	891400214
39	345	3	891400159
39	347	4	891400704
39	352	5	891400704
39	900	3	891400159
40	243	2	889041694
40	258	3	889041981
40	268	4	889041430
40	271	2	889041523
40	294	4	889041671
40	303	4	889041283
40	333	4	889041402
40	340	2	889041454
40	345	4	889041670
40	347	2	889041283
40	750	3	889041523
40	754	4	889041790
40	880	3	889041643
41	1	4	890692860
41	28	4	890687353
41	31	3	890687473
41	69	4	890687145
41	98	4	890687374
41	100	4	890687242
41	153	4	890687087
41	170	4	890687713
41	174	4	890687264
41	181	4	890687175
41	209	4	890687642
41	265	3	890687042
41	286	4	890685449
41	289	2	890686673
41	313	3	890685449
41	423	2	890687175
41	435	3	890687550
41	486	4	890687305
41	518	3	890687412
41	746	3	890687019
41	751	4	890686872
42	12	4	881107502
42	25	3	881110670
42	28	5	881108187
42	44	3	881108548
42	48	5	881107821
42	63	4	881108873
42	69	4	881107375
42	70	3	881109148
42	72	3	881108229
42	77	5	881108684
42	79	5	881108040
42	82	4	881107449
42	88	5	881108425
[truncated: 18,000 more rows]
