# Supplementary material
Source: ML conference proceedings conference paper supplement (https://proceedings.neurips.cc/paper_files/paper/2022/hash/01ecd39ca49ddecc5729ca996304781b-Abstract.html)
Supplement: Supplementary file 1 [file 01ecd39ca49ddecc5729ca996304781b-Supplemental-Conference.zip › supplementary NEURIPS 2022/CODE_supplementary/data/ml-100k/u2.test]

1	1	5	874965758
1	2	3	876893171
1	8	1	875072484
1	9	5	878543541
1	21	1	878542772
1	22	4	875072404
1	26	3	875072442
1	30	3	878542515
1	32	5	888732909
1	34	2	878542869
1	37	2	878543030
1	38	3	878543075
1	40	3	876893230
1	63	2	878543196
1	68	4	875072688
1	75	4	878543238
1	89	5	875072484
1	93	5	875071484
1	99	3	875072547
1	105	2	875240739
1	119	5	876893098
1	131	1	878542552
1	133	4	876892818
1	135	4	875072404
1	136	3	876893206
1	138	1	878543006
1	141	3	878542608
1	144	4	875073180
1	146	4	875071561
1	147	3	875240993
1	158	3	878542699
1	166	5	874965677
1	173	5	878541803
1	176	5	876892468
1	179	3	875072370
1	181	5	874965739
1	187	4	874965678
1	194	4	876892743
1	197	5	875072956
1	205	3	878542909
1	211	3	878541970
1	220	3	875241390
1	234	4	876892355
1	237	2	875071749
1	239	4	878542845
1	246	5	874965905
1	247	1	875241619
1	249	4	874965970
1	256	4	889751712
1	257	4	874965954
1	268	5	875692927
1	269	5	877482427
1	270	5	888732827
1	271	2	887431672
2	1	4	888550871
2	10	2	888551853
2	14	4	888551853
2	25	4	888551648
2	111	4	888551853
2	242	5	888552084
2	258	3	888549961
2	273	4	888551647
2	276	4	888551552
2	277	4	888551174
2	282	4	888551922
2	283	5	888552084
2	287	3	888551235
2	291	3	888551647
2	293	4	888550939
2	294	1	888551648
2	295	4	888551164
2	305	3	888550065
2	306	4	888550774
2	309	1	888980029
2	310	4	888979061
3	181	4	889237482
3	258	2	889237026
3	260	4	889237455
3	268	3	889236961
3	288	2	889237026
3	302	2	889236939
3	303	3	889236983
3	317	2	889237482
3	320	5	889237482
3	321	5	889237455
3	322	3	889237269
3	329	4	889237455
3	338	2	889237297
3	339	3	889237141
3	342	4	889237174
3	355	3	889237247
4	210	3	892003374
4	258	5	892001374
4	271	4	892001690
4	300	5	892001445
4	328	3	892001537
4	329	5	892002352
5	21	3	875635327
5	25	3	875635318
5	29	4	875637023
5	50	4	875635758
5	70	4	875636389
5	95	4	875721168
5	99	3	875721216
5	101	5	878844510
5	135	4	875637536
5	151	3	875635723
5	162	1	875721572
5	168	3	875636691
5	172	5	875636130
5	183	4	875636014
5	186	5	875636375
5	194	4	878845197
5	208	4	875636675
5	226	3	875635962
5	229	2	875635947
5	257	5	875635239
5	371	1	875720967
5	378	1	875721167
5	381	1	875636540
5	390	5	875636340
5	392	2	875637330
5	395	2	879198898
5	399	3	875635947
5	401	5	875636308
5	405	3	875635225
5	408	5	878844495
5	414	3	875636691
5	415	1	875636842
5	416	1	875721196
5	427	3	875721167
5	430	5	875636631
5	432	4	875636793
5	437	1	878844423
5	440	1	878844423
5	442	1	879198898
5	443	4	875720744
5	449	2	875636099
5	451	1	875636571
5	452	1	878844397
5	456	1	875636375
6	12	4	883601053
6	13	2	883599400
6	21	3	883600152
6	22	3	883602048
6	47	3	883600943
6	50	4	883600842
6	64	4	883600597
6	137	5	883599327
6	165	5	883600747
6	166	4	883601426
6	169	4	883600943
6	174	4	883600985
6	177	4	883600818
6	178	4	883600785
6	186	4	883602730
6	191	4	883601088
6	194	4	883601365
6	200	3	883602422
6	203	3	883602864
6	246	3	883599509
6	259	1	883268375
6	272	4	883717304
6	274	4	883602501
6	293	3	883599327
6	310	2	883268353
6	321	3	883268353
6	367	2	883602690
6	405	1	883600066
6	408	4	883599075
6	410	4	883599707
6	419	4	883602284
6	427	4	883600707
6	435	4	883601529
6	461	4	883601393
6	465	1	883683508
6	473	2	883600111
6	482	4	883601203
6	485	5	883602664
6	493	5	883601713
6	494	4	883601713
6	495	4	883601366
6	501	5	883602730
6	503	3	883602133
6	504	3	883601155
6	505	4	883602422
6	507	4	883601310
6	510	4	883600785
6	512	4	883601155
6	514	5	883600657
6	516	4	883602664
6	520	4	883600985
6	522	5	883601500
6	529	4	883601459
6	530	4	883601203
6	536	4	883599400
6	538	2	883268483
7	23	3	891351383
7	27	4	891352692
7	29	3	891353828
7	47	5	891352692
7	51	2	891352984
7	56	5	891351432
7	62	3	891354499
7	64	5	891350756
7	77	5	891353325
7	80	4	891354381
7	91	3	891353860
7	97	5	891351201
7	98	4	891351002
7	99	5	891352557
7	100	5	891351082
7	134	4	892134959
7	135	5	891351547
7	140	5	891353124
7	143	3	892132627
7	157	5	891352059
7	175	5	892133057
7	178	4	891350932
7	187	4	891350757
7	192	4	891352010
7	194	5	891351851
7	199	5	892135346
7	201	2	891351471
7	213	3	891351686
7	215	4	891351624
7	216	4	891350900
7	219	1	892131924
7	229	3	891352384
7	231	3	892132885
7	234	5	891351041
7	237	5	891351772
7	258	4	892135277
7	286	4	891350703
7	294	1	892130809
7	324	1	892135078
7	380	4	891354053
7	391	3	892132943
7	403	4	891351234
7	405	3	891353290
7	416	5	891353051
7	419	3	891350900
7	429	5	891351002
7	436	5	891351471
7	440	1	892131978
7	446	2	892132020
7	447	5	891350900
7	449	3	891354785
7	465	4	891353154
7	499	4	891351472
7	507	5	891352383
7	527	5	891351772
7	529	2	891352626
7	547	3	891353710
7	552	4	891354531
7	556	3	891352659
7	557	4	892132145
7	558	4	892131924
7	565	4	892132019
7	571	3	891353950
7	572	3	891354331
7	574	5	892132402
7	578	3	891354090
7	583	2	892132380
7	584	4	891352093
7	585	4	892133180
7	588	4	891352261
7	590	2	891354730
7	593	5	891351851
7	595	2	891353801
7	596	5	891351728
7	597	3	891353744
7	600	4	891354090
7	603	4	891350757
7	609	3	891352749
7	611	3	891351161
7	612	5	891351121
7	613	4	891352010
7	616	4	891351002
7	617	5	891354588
7	620	4	891353892
7	628	3	891352831
7	646	5	891351383
7	656	3	891351509
7	660	5	891353051
7	665	4	891354471
7	677	3	891354499
7	678	3	891350356
7	679	5	891353124
7	682	2	891350383
8	82	5	879362356
8	174	5	879362183
8	195	5	879362287
8	228	5	879362286
8	229	5	879362356
8	233	4	879362423
8	241	4	879362423
8	259	1	879361604
8	273	3	879362287
8	341	2	879361825
8	435	5	879362233
8	518	4	879362422
8	684	4	879362356
9	276	4	886959423
9	294	4	886959453
9	402	4	886959343
9	483	5	886960056
9	615	4	886959344
9	690	1	886959344
10	11	4	877888677
10	32	4	877886661
10	33	4	877893020
10	50	5	877888545
10	82	4	877886912
10	116	4	877888944
10	129	4	877891966
10	134	5	877889131
10	137	4	877889186
10	157	5	877889004
10	161	4	877892050
10	162	4	877892210
10	174	4	877886661
10	178	5	877888677
10	182	5	877888876
10	205	5	877888812
10	211	5	877889130
10	216	4	877889333
10	221	4	877888677
10	245	4	877886281
10	274	4	877889333
10	302	4	877886162
10	333	4	877886359
10	334	4	877886281
10	357	5	877889186
10	404	4	877886911
10	432	4	877892160
10	462	3	877891747
10	467	4	877891904
10	480	5	877888943
10	510	5	877892209
10	511	4	877888877
10	513	4	877886598
10	527	4	877886597
10	529	3	877892438
10	531	5	877886911
10	606	5	877888876
10	663	3	877886598
10	664	4	877886911
10	692	4	877889261
10	694	5	877892437
10	697	3	877888677
11	24	3	891904016
11	39	3	891905824
11	56	4	891904949
11	57	2	891904552
11	69	3	891904270
11	70	4	891904573
11	79	4	891905783
11	86	4	891904551
11	98	2	891905783
11	168	3	891904949
11	180	2	891904335
11	211	3	891905003
11	222	3	891902718
11	228	3	891905824
11	237	4	891903005
11	238	3	891905032
11	258	5	891901696
11	259	3	891902270
11	274	3	891906510
11	286	5	891901606
11	290	3	891903877
11	317	4	891904174
11	357	5	891904241
11	370	3	891902880
11	386	3	891905279
11	405	3	891904016
11	414	3	891905393
11	423	5	891904174
11	433	4	891905003
11	508	4	891903005
11	544	4	891903226
11	549	4	891904617
11	577	3	891905555
11	580	5	891905222
11	654	3	891905856
11	659	5	891904920
11	692	4	891905003
11	707	5	891906389
11	716	3	891905058
11	719	3	891905279
11	727	3	891904335
11	728	3	891905366
11	731	4	891904789
11	742	3	891902815
11	745	5	891905324
11	749	5	891901797
11	750	5	891901629
12	133	4	879959670
12	159	4	879959306
12	168	4	879959513
12	170	4	879959374
12	195	4	879959670
12	202	4	879959514
12	216	5	879960826
12	242	5	879960826
12	392	4	879959025
12	591	5	879959212
12	708	3	879959394
13	1	3	882140487
13	4	5	882141306
13	5	1	882396869
13	7	2	882396790
13	12	5	881515011
13	13	5	882141617
13	17	1	882396954
13	23	5	882139937
13	32	4	882140286
13	51	3	882399419
13	68	3	882397741
13	79	3	882139746
13	83	2	886303585
13	89	4	882139717
13	91	2	882398724
13	92	3	882397271
13	95	5	882140104
13	96	4	882140104
13	99	4	882398654
13	110	3	882141130
13	117	3	882398138
13	138	1	882399218
13	155	2	882399615
13	170	5	882139774
13	177	5	882397271
13	183	4	882397271
13	191	3	881515193
13	193	5	882139937
13	194	5	882141458
13	200	3	882140552
13	204	5	882140318
13	216	3	881515193
13	222	3	882140285
13	233	4	882397650
13	234	5	882140252
13	237	5	882140285
13	241	3	882397502
13	286	3	881514683
13	292	5	882140867
13	311	3	881514726
13	313	4	882774047
13	316	5	888073653
13	321	2	882140740
13	327	3	881515521
13	328	3	881514811
13	329	2	886952246
13	332	3	881515457
13	339	3	882140718
13	342	4	885744650
13	347	5	885185824
13	350	2	886302293
13	355	3	888688733
13	357	3	881515411
13	394	2	882399615
13	401	1	882141841
13	403	2	882397271
13	404	5	882399014
13	413	1	882396984
13	417	2	882398934
13	419	3	882398814
13	427	5	882398814
13	430	5	882139495
13	433	4	881515239
13	435	5	882141392
13	441	1	882396984
13	442	1	890705056
13	462	5	882140487
13	463	5	882140318
13	475	3	881515113
13	478	4	884538571
13	484	5	882139804
13	494	4	881515295
13	518	4	882140252
13	523	4	882141306
13	527	5	882140252
13	529	4	882140206
13	538	1	884538448
13	547	1	882397011
13	550	4	882397741
13	551	1	882397084
13	553	2	882399419
13	554	2	882397833
13	559	1	882396913
13	563	1	882397039
13	565	1	882397040
13	578	3	882397974
13	585	4	882141814
13	603	4	884538571
13	606	4	882140130
13	613	4	881515411
13	621	4	882398934
13	637	2	882396913
13	639	3	882139804
13	646	4	882140037
13	654	5	881515295
13	661	5	881515411
13	663	5	882140252
13	669	1	882397067
13	672	1	882396914
13	674	3	882396955
13	679	4	882397650
13	686	5	882397146
13	688	1	883670819
13	689	2	881515735
13	706	1	882396869
13	709	4	882139863
13	712	4	882141872
13	732	5	882141617
13	733	5	882399528
13	737	4	882399615
13	739	4	886303745
13	740	1	882140355
13	747	4	882140624
13	754	4	882140718
13	757	3	882398934
13	760	1	882396914
13	763	1	882141458
13	768	4	882398724
13	769	3	882397040
13	770	4	882397581
13	773	1	882396869
13	785	3	882141924
13	790	2	882141841
13	791	5	882141686
13	792	5	882139686
13	795	2	882399219
13	796	3	886304188
13	800	1	882397067
13	801	3	886303172
13	804	2	882141997
13	824	3	886302261
13	827	3	882398327
13	829	3	882398385
13	833	2	882397974
13	838	1	882397742
13	843	5	882399156
13	845	3	882141503
13	846	2	882141997
13	849	1	882397833
13	850	4	882140318
13	851	5	882139966
13	855	4	882140130
13	867	5	882399615
13	871	2	882141924
13	872	3	882139327
13	879	2	881515697
13	880	3	882140966
13	883	3	882140848
13	884	2	882140814
13	889	3	892015236
13	900	5	888279677
13	909	5	890704721
13	914	2	892870589
14	12	5	890881216
14	32	5	890881485
14	96	4	890881433
14	124	5	876964936
14	127	2	879644647
14	210	5	879119739
14	222	4	876965061
14	238	5	879119579
14	288	4	876964936
14	319	1	884482684
14	427	5	890881433
14	428	4	879119497
14	628	5	880929697
14	750	3	891014196
14	820	3	882839856
14	920	4	880929745
14	921	5	890881384
15	13	1	879455940
15	14	4	879455659
15	15	4	879455939
15	50	5	879455606
15	118	1	879456381
15	181	5	879455710
15	235	1	879456424
15	243	1	879455362
15	248	1	879455871
15	251	2	879455541
15	252	2	879456351
15	255	5	879455764
15	257	4	879455821
15	269	5	879455165
15	280	3	879456167
15	282	3	879456204
15	285	4	879455635
15	291	3	879456084
15	292	5	879455128
15	302	4	879455049
15	303	3	879455080
15	306	5	879455165
15	308	5	879455334
15	310	4	879455049
15	323	1	879455311
15	333	1	879455128
15	409	3	879456324
15	455	1	879455914
15	546	2	879456324
15	676	4	879455871
15	690	4	879455128
15	866	4	879456288
15	879	3	879455311
15	926	1	879456424
15	927	4	879456381
15	928	1	879456404
15	930	2	879456381
15	935	3	879455710
15	936	5	879455889
16	1	5	877717833
16	4	5	877726390
16	11	5	877718755
16	12	5	877718168
16	58	4	877720118
16	79	5	877727122
16	95	5	877728417
16	109	4	877719333
16	143	5	877727192
16	200	5	877722736
16	204	5	877722736
16	208	5	877727054
16	216	5	877722736
16	234	5	877720185
16	237	5	877719504
16	240	4	877724603
16	282	5	877718755
16	385	5	877727192
16	404	5	877728417
16	427	5	877722001
16	467	5	877720733
16	469	3	877720916
16	498	5	877719333
16	502	4	877723670
16	509	2	877720118
16	510	4	877727280
16	531	5	877722736
16	642	5	877719075
16	770	3	877724979
16	941	1	877720437
16	946	5	877724727
16	947	4	877719454
16	948	3	877717397
17	117	3	885272724
17	137	4	885272606
17	150	5	885272654
17	286	3	885165619
17	294	4	885166209
17	323	1	885166256
18	4	3	880132150
18	6	5	880130764
18	9	5	880130550
18	42	3	880130713
18	45	5	880130739
18	60	4	880132055
18	61	4	880130803
18	65	5	880130333
18	66	3	880131728
18	79	4	880131450
18	91	3	880130393
18	94	3	880131676
18	95	4	880131297
18	98	5	880129527
18	125	3	880131004
18	132	5	880132437
18	134	5	880129877
18	153	4	880130551
18	157	3	880131849
18	165	4	880129527
18	166	4	880129595
18	168	3	880130431
18	177	3	880131297
18	198	3	880130613
18	200	3	880131775
18	211	5	880131358
18	213	5	880131201
18	236	3	880131077
18	238	5	880132437
18	283	5	880130551
18	284	3	880131804
18	285	5	880130333
18	287	4	880131144
18	319	4	880129305
18	378	3	880131804
18	402	3	880132225
18	403	3	880132103
18	404	4	880132055
18	416	5	880131144
18	425	3	880130713
18	430	4	880130155
18	435	4	880130890
18	461	4	880130713
18	474	4	880129731
18	476	3	880132399
18	478	5	880129691
18	480	4	880129595
18	486	3	880131559
18	504	5	880129940
18	519	4	880129991
18	520	4	880129595
18	582	5	880131450
18	588	4	880131201
18	613	5	880129769
18	627	3	880131931
18	639	4	880131407
18	649	3	880131591
18	654	4	880130110
18	663	4	880129454
18	707	3	880131450
18	708	3	880129595
18	709	5	880131028
18	735	4	880130582
18	736	4	880131028
18	762	3	880132103
18	781	3	880132188
18	805	4	880131358
18	845	3	880131236
18	949	3	880131559
18	951	3	880129595
18	969	3	880131106
18	972	3	880130515
18	973	3	880129595
19	210	3	885412840
19	211	4	885412840
19	268	2	885412034
19	288	3	885411840
19	319	4	885411465
19	325	4	885412251
19	887	4	885411465
20	94	2	879669954
20	151	3	879668555
20	174	4	879669087
20	181	4	879667904
20	210	4	879669065
20	357	1	879669244
20	423	2	879669313
20	498	3	879669001
20	588	4	879669120
20	763	1	879668476
20	820	2	879668626
20	866	1	879668583
20	934	4	879668783
21	5	2	874951761
21	7	5	874951292
21	17	4	874951695
21	123	4	874951382
21	145	1	874951761
21	200	5	874951695
21	201	5	874951658
21	240	4	874951245
21	243	2	874951039
21	244	4	874951349
21	261	1	874951006
21	262	4	874950931
21	263	1	874951040
21	281	2	874951416
21	289	3	874950972
21	300	3	874950889
21	301	4	874951054
21	322	3	874951005
21	406	1	874951293
21	413	2	874951293
21	436	4	874951858
21	443	4	874951761
21	453	2	874951797
21	547	2	874951292
21	551	3	874951898
21	559	1	874951761
21	561	1	874951761
21	563	2	874951898
21	567	2	874951858
21	669	1	874951761
21	674	2	874951897
21	675	5	874951897
21	680	1	874950972
21	706	2	874951695
21	748	1	874950889
21	760	1	874951293
21	767	1	874951314
21	854	5	874951657
21	872	2	874950889
21	874	2	874951005
21	878	2	874951039
21	925	2	874951447
21	976	1	874951483
21	981	2	874951382
21	984	1	874951040
21	988	1	874951005
21	989	3	874951039
21	993	4	874951245
22	21	4	878886750
22	24	5	878888026
22	53	3	878888107
22	85	5	878886989
22	94	3	878887277
22	105	1	878887347
22	109	4	878886710
22	163	1	878886845
22	167	3	878887023
22	175	4	878886682
22	184	5	878887869
22	187	5	878887680
22	202	5	878886480
22	211	3	878886518
22	216	4	878886682
22	229	2	878887925
22	231	2	878887983
22	367	1	878886571
22	431	4	878888026
22	449	1	878888145
22	451	4	878887062
22	515	5	878887869
22	523	5	878886845
22	546	3	878888107
22	636	3	878888106
22	651	4	878887810
22	665	1	878888145
22	684	3	878887983
22	840	4	878888184
22	862	1	878886845
22	932	1	878887277
22	988	1	878887116
22	996	1	878887158
22	1002	1	878887186
22	1003	1	878887277
23	7	4	874784385
23	14	4	874784440
23	19	4	874784466
23	79	4	874785957
23	82	3	874787449
23	91	4	884550049
23	95	4	874786220
23	100	5	874784557
23	124	5	874784440
23	132	4	874785756
23	134	4	874786098
23	145	3	874786244
23	151	3	874784668
23	155	3	874787059
23	156	3	877817091
23	161	2	874787017
23	174	4	874785652
23	175	5	874785526
23	185	4	874785756
23	202	3	874785165
23	203	4	874786746
23	204	3	874786122
23	224	5	874784638
23	230	4	874785809
23	250	4	874784338
23	275	5	874785474
23	283	4	874784575
23	294	1	876785901
23	386	4	874789001
23	408	5	874784538
23	414	3	874785526
23	418	4	874786037
23	432	4	884550048
23	433	5	874785233
23	472	2	874784972
23	530	4	874789279
23	588	4	884550021
23	597	3	874785024
23	629	4	874786098
23	652	4	874785926
23	780	1	874788388
23	856	4	874787288
23	961	5	874785165
24	8	5	875323002
24	11	5	875323100
24	41	5	875323594
24	55	5	875323308
24	69	5	875323051
24	127	5	875323879
24	173	5	875323474
24	176	5	875323595
24	180	5	875322847
24	200	5	875323440
24	237	4	875323002
24	238	5	875323274
24	249	4	875246216
24	289	3	875245985
24	300	4	875245985
24	357	5	875323100
24	421	5	875323712
24	486	3	875322908
24	582	4	875323368
24	727	3	875322727
24	729	5	875323475
24	919	3	875246185
25	116	4	885853335
25	131	4	885852611
25	141	4	885852720
25	143	3	885852529
25	186	4	885852569
25	195	4	885852008
25	265	4	885853415
25	474	4	885852008
25	479	5	885852569
25	568	4	885852529
25	655	4	885852248
25	837	4	885852611
25	968	4	885852218
26	1	3	891350625
26	14	3	891371505
26	24	3	891377540
26	50	4	891386368
26	109	3	891376987
26	118	3	891385691
26	121	3	891377540
26	126	4	891371676
26	129	4	891350566
26	151	3	891372429
26	181	4	891386369
26	222	3	891371369
26	246	4	891351590
26	276	4	891386369
26	300	4	891347537
26	302	5	891386368
26	304	4	891348011
26	316	3	891349122
26	405	2	891376986
26	413	2	891386049
26	458	3	891352941
26	546	2	891371676
26	628	3	891372429
26	748	1	891348192
26	750	4	891347478
26	831	2	891379753
26	1011	3	891371597
26	1012	4	891386369
26	1014	3	891384414
27	9	4	891542942
27	50	3	891542897
27	118	3	891543222
27	148	3	891543129
27	244	3	891543222
27	286	3	891543393
28	11	4	881956144
28	56	5	881957479
28	117	4	881957002
28	164	4	881960945
28	176	5	881956445
28	195	4	881957250
28	200	2	881961671
28	227	4	881961393
28	286	3	881955018
28	323	3	882826593
28	429	5	881960794
28	443	4	881961671
28	449	2	881961394
28	609	3	881956220
28	670	4	881961600
28	760	3	882826399
28	859	3	881961842
29	79	4	882821989
29	286	5	882820663
29	300	3	882820897
29	480	4	882821989
29	661	5	882821942
29	879	3	882821161
30	2	3	875061066
30	172	4	875060742
30	174	5	885941156
30	242	5	885941156
30	258	5	885941156
30	259	4	875058280
30	304	4	875988548
30	315	4	885941412
30	873	1	875061066
30	892	4	884310496
31	32	5	881548030
31	175	5	881548053
31	268	3	881547746
31	299	4	881547814
31	319	4	881547788
31	328	2	881547746
31	340	3	881547788
31	490	4	881548030
31	875	4	881547938
31	1021	3	881548082
32	9	3	883717747
32	222	3	883717600
32	240	2	883717967
32	248	4	883717816
32	271	3	883709953
32	288	4	883709915
32	307	2	883709915
32	313	4	883709840
32	405	4	883718008
32	475	5	883717766
32	508	4	883717581
32	742	3	883717628
32	1023	3	883717913
33	245	3	891964326
33	260	4	891964306
33	294	3	891964166
33	348	4	891964404
33	678	4	891964306
33	682	4	891964274
33	879	3	891964230
34	292	5	888602742
34	294	1	888602808
34	324	5	888602808
34	1024	5	888602618
35	258	2	875458941
35	261	3	875459046
35	328	3	875459046
35	358	1	875459073
35	678	3	875459017
35	876	2	875458970
35	879	4	875459073
35	881	2	875459127
35	937	4	875459237
36	288	4	882157227
36	289	2	882157356
36	333	4	882157227
36	358	5	882157581
36	873	3	882157386
36	875	3	882157470
36	878	5	882157581
36	1026	5	882157581
37	27	4	880915942
37	50	5	880915838
37	68	5	880915902
37	82	1	880915942
37	89	4	880930072
37	92	4	880930072
37	118	2	880915633
37	127	4	880930071
37	147	3	880915749
37	174	5	880915810
37	231	2	880916046
37	273	3	880915528
37	546	3	880915565
37	550	4	880915902
37	566	4	880916010
37	665	3	880916046
37	825	2	880915565
38	69	5	892430486
38	70	5	892432424
38	84	5	892430937
38	97	5	892430369
38	105	3	892434217
38	112	5	892432751
38	127	2	892429460
38	188	2	892431953
38	200	5	892432180
38	247	5	892429460
38	259	3	892428754
38	313	5	892428216
38	356	2	892430309
38	395	3	892434164
38	402	5	892430539
38	405	5	892432205
38	418	5	892431026
38	445	2	892429399
38	588	5	892429225
38	590	1	892434373
38	681	5	892429065
38	742	5	892430001
38	1033	5	892432531
38	1035	5	892431907
38	1036	4	892433704
39	269	4	891400188
39	270	4	891400609
39	313	4	891400159
39	937	5	891400704
40	245	3	889041671
40	269	1	889041283
40	270	3	889041477
40	286	2	889041430
40	305	4	889041430
40	316	3	889041643
40	337	4	889041523
40	879	2	889041595
40	896	4	889041402
41	175	5	890687526
41	188	4	890687571
41	195	4	890687042
41	196	3	890687593
41	202	2	890687326
41	216	3	890687571
41	318	4	890687353
41	414	4	890687550
41	430	5	890692860
41	474	5	890687066
41	516	5	890687242
42	1	5	881105633
42	15	4	881105633
42	43	2	881109325
42	54	4	881108982
42	58	5	881108040
42	66	4	881108280
42	83	4	881108093
42	125	4	881105462
42	161	4	881108229
42	173	5	881107220
42	175	2	881107687
42	202	5	881107687
42	203	4	881107413
42	219	1	881109324
42	228	4	881107538
42	229	4	881108684
42	237	4	881105882
42	283	3	881110483
42	290	3	881106072
42	371	4	881108760
42	385	5	881108147
42	387	3	881108760
42	402	5	881108982
42	419	5	881107178
42	427	4	881107773
42	443	3	881108093
42	469	4	881109324
42	471	4	881105505
42	501	5	881108345
42	582	3	881108928
42	627	2	881109271
42	679	2	881108548
42	720	4	881109149
42	729	3	881108345
42	756	5	881106420
42	924	3	881105677
42	934	4	881106419
42	1042	3	881109325
42	1047	4	881106419
43	3	2	884029543
43	9	4	875975656
43	25	5	875975656
43	79	4	875981335
43	82	4	883955498
43	86	4	883955020
43	88	5	883955702
43	97	5	883955293
43	111	4	883955745
43	133	4	875981483
43	140	4	883955110
43	172	4	883955135
43	189	5	875981220
43	196	4	875981190
43	211	4	883955785
43	217	2	883955930
43	231	4	883955995
43	250	2	875975383
43	269	5	888177393
43	276	4	883954876
43	278	3	884029259
43	280	3	883955806
43	283	2	883955415
43	290	4	884029192
43	291	3	883955995
43	312	4	883953502
43	313	5	887076865
43	317	2	883955319
43	347	3	888177393
43	385	5	883955387
43	408	5	875975492
43	479	4	875981365
43	496	5	883955605
43	559	1	883956468
43	588	4	883955745
43	660	4	883955859
43	686	3	883955884
43	735	4	875981275
43	742	5	883955650
43	756	3	884029519
43	778	5	883955363
43	781	3	883956494
43	785	3	883956538
43	939	3	883955547
43	1023	3	875975323
43	1035	4	883955745
43	1047	3	883956387
43	1048	3	883956260
43	1052	1	892350297
43	1054	3	884029658
43	1056	3	883955498
44	1	4	878341315
44	24	3	878346575
44	25	2	878346431
44	69	4	878347711
44	71	3	878347633
44	81	4	878348499
44	89	5	878347315
44	90	2	878348784
44	98	2	878347420
44	99	4	878348812
44	100	5	878341196
44	121	4	878346946
44	132	4	878347315
44	135	5	878347259
44	143	4	878347392
44	159	3	878347633
44	196	4	878348885
44	200	4	878347633
44	211	4	878347598
44	231	2	878347915
44	249	4	878346630
44	260	4	878340905
44	313	4	883612268
44	380	4	883613334
44	405	3	878346512
44	423	4	878348111
44	429	4	878347791
44	448	2	878348547
44	450	2	883613335
44	591	4	878341315
44	631	1	883613297
44	655	3	878347455
44	678	3	878340887
44	737	1	883613298
44	871	3	883613005
44	946	3	878347847
45	13	5	881012356
45	50	5	881007272
45	225	4	881014070
45	411	3	881015657
45	596	3	881014015
45	756	2	881015244
45	762	4	881013563
45	820	4	881015860
45	823	4	881014785
45	934	2	881015860
46	50	4	883616254
46	125	4	883616284
46	245	3	883614625
47	258	4	879438984
47	269	4	879438984
47	288	2	879439078
47	327	4	879440360
47	683	3	879439143
48	98	5	879434954
48	136	4	879434689
48	183	5	879434608
48	185	4	879434819
48	191	5	879434954
48	209	5	879434954
48	269	1	879434094
48	294	3	879434212
48	479	4	879434723
48	480	4	879434653
48	483	5	879434607
48	496	5	879434791
48	519	3	879434689
48	523	5	879434689
48	527	4	879434654
48	528	5	879434954
48	647	4	879434819
48	1064	4	879434688
48	1065	2	879434792
49	13	3	888068816
49	42	4	888068791
49	50	1	888067691
49	71	3	888067096
49	80	1	888069117
49	82	1	888067765
49	90	1	888069194
49	91	5	888066979
49	96	1	888069512
49	98	4	888067307
49	145	1	888067460
49	159	2	888068245
49	217	3	888067405
49	218	2	888068651
49	262	5	888065620
49	270	2	888065432
49	382	2	888066705
49	403	3	888069636
49	419	4	888067691
49	420	4	888067031
49	433	5	888068739
49	557	3	888066394
49	561	2	888067460
49	627	2	888067096
49	640	1	888066685
49	692	1	888069040
49	698	2	888066776
49	928	2	888068651
49	946	2	888067096
49	1018	2	888066755
49	1021	5	888066647
49	1028	2	888069304
49	1066	2	888067187
49	1067	3	888068842
49	1071	3	888069138
49	1072	1	888069194
49	1080	4	888066734
49	1083	2	888068651
50	268	4	877051656
50	276	2	877052400
50	288	4	877052008
50	319	5	877051687
50	324	5	877052008
50	1008	5	877052805
50	1010	5	877052329
51	83	5	883498937
51	173	5	883498844
51	203	4	883498685
51	479	3	883498655
51	603	3	883498728
52	13	5	882922485
52	19	5	882922407
52	22	5	882922833
52	111	4	882922357
52	117	4	882922629
52	121	4	882922382
52	126	5	882922589
52	151	5	882922249
52	204	4	882923012
52	237	4	882922227
52	258	5	882922065
52	285	5	882922227
52	463	5	882922927
52	471	4	882922562
52	527	5	882922927
52	588	4	882922927
52	762	3	882922806
52	815	4	882922357
52	864	3	882922661
52	1011	4	882922588
53	7	3	879442991
53	64	5	879442384
53	96	4	879442514
53	118	4	879443253
53	121	4	879443329
53	546	4	879443329
53	568	4	879442538
53	628	5	879443253
53	1087	4	879443329
54	1	4	880931595
54	7	4	880935294
54	24	1	880937311
54	25	4	880936500
54	151	2	880936670
54	181	5	880931358
54	255	3	882153415
54	272	5	890608175
54	288	4	880928957
54	291	1	891898613
54	295	3	880936905
54	328	4	880928957
54	338	3	880929490
54	340	4	890608225
54	471	4	880937399
54	546	3	880937583
54	829	2	880937311
54	930	1	880937813
55	117	3	878176047
55	118	5	878176134
55	181	4	878176237
55	597	2	878176134
56	11	4	892676376
56	67	2	892677114
56	78	3	892910544
56	88	1	892683895
56	97	3	892677186
56	111	2	892683877
56	117	5	892679439
56	151	4	892910207
56	154	2	892911144
56	158	3	892911539
56	173	4	892737191
56	176	5	892676377
56	183	5	892676314
56	191	4	892678526
56	200	4	892679088
56	210	5	892676377
56	232	4	892676339
56	234	4	892679067
56	323	3	892676028
56	376	3	892911420
56	386	3	892911494
56	399	4	892910247
56	403	4	892678942
56	408	4	892683248
56	423	5	892737191
56	483	4	892682889
56	523	4	892676970
56	550	4	892910860
56	720	3	892910860
56	778	4	892678669
56	781	4	892677147
56	794	3	892683960
56	820	3	892683303
56	862	3	892910292
56	946	4	892737210
56	1035	4	892910268
56	1057	3	892683978
57	8	4	883698292
57	11	3	883698454
57	24	3	883697459
57	42	5	883698324
57	64	5	883698431
57	105	3	883698009
57	109	4	883697293
57	111	4	883697679
57	125	3	883697223
57	126	3	883697293
57	181	5	883697352
57	245	4	883696709
57	249	5	883697704
57	284	3	883697158
57	295	5	883698581
57	318	5	883698580
57	405	4	883697459
57	472	1	883697253
57	546	4	883697482
57	710	3	883698324
57	748	4	883696629
57	763	5	883698581
57	820	3	883698039
57	826	2	883697990
57	833	4	883697705
57	871	3	883697536
57	1073	3	883698525
57	1096	3	883697940
58	11	5	884305019
58	12	5	884304895
58	70	4	890321652
58	116	5	884304409
58	124	5	884304483
58	127	4	884304503
58	171	5	884663379
58	172	5	884305241
58	175	5	884663324
58	176	4	884304936
58	185	2	884304896
58	189	3	884304790
58	209	5	884305019
58	269	4	884304267
58	300	4	884388247
58	310	4	884459024
58	433	5	884305165
58	463	3	884305241
58	474	4	884305087
58	496	2	891611593
58	501	2	884305220
58	511	5	884304979
58	512	3	890770101
58	514	5	884305321
58	640	5	884304767
58	645	5	884304838
58	652	5	884304728
58	692	2	884305123
58	732	3	884305321
58	741	2	892242159
58	1006	2	884304865
58	1012	4	884304627
58	1048	1	892242190
58	1089	1	892242818
58	1101	5	890421373
58	1105	2	884794758
59	1	2	888203053
59	3	4	888203814
59	9	4	888203053
59	11	5	888205744
59	22	4	888204260
59	44	4	888206048
59	51	5	888206095
59	52	4	888205615
59	55	5	888204553
59	56	5	888204465
59	58	4	888204389
59	59	5	888204928
59	61	4	888204597
59	64	5	888204309
59	79	5	888204260
59	83	4	888204802
59	87	4	888205228
59	99	4	888205033
59	111	4	888203095
59	123	3	888203343
59	135	5	888204758
59	137	5	888203234
59	147	5	888203270
59	149	4	888203313
59	161	3	888205855
59	168	5	888204641
59	174	5	888204553
59	176	5	888205574
59	181	5	888204877
59	194	3	888204841
59	199	4	888205410
59	201	4	888204260
59	205	3	888204260
59	210	4	888204309
59	211	5	888206048
59	216	4	888205228
59	220	2	888203175
59	226	4	888206362
59	232	3	888206485
59	234	5	888204928
59	237	3	888203371
59	276	5	888203095
59	284	2	888203449
59	288	5	888202787
59	357	5	888204349
59	393	2	888205714
59	403	5	888206605
59	404	3	888205463
59	410	3	888203270
59	416	3	888205660
59	423	5	888204465
59	432	4	888204802
59	435	5	888204553
59	436	5	888206094
59	443	5	888205370
59	462	5	888205787
59	477	3	888203415
59	483	5	888204309
59	484	4	888204502
59	489	4	888205300
59	491	4	888206689
59	498	5	888204927
59	508	5	888203095
59	514	5	888204641
59	523	4	888204389
59	529	4	888205145
59	581	5	888206015
59	595	3	888203658
59	606	4	888204802
59	610	4	888205615
59	612	3	888206161
59	615	4	888204553
59	618	4	888205956
59	642	5	888206254
59	647	5	888205336
59	649	4	888205660
59	650	5	888205534
59	651	5	888204997
59	654	4	888204309
59	657	4	888204597
59	670	4	888206485
59	673	5	888204802
59	675	5	888205534
59	713	5	888203579
59	741	4	888203175
59	746	5	888204642
59	747	4	888205410
59	756	2	888203658
59	762	4	888203708
59	770	4	888205534
59	781	4	888206605
59	845	5	888203579
59	919	4	888203018
59	963	5	888204757
59	975	4	888203610
59	1005	5	888206363
59	1021	4	888204996
59	1050	2	888205188
59	1101	5	888205265
59	1115	3	888203128
59	1119	4	888206094
60	8	3	883326370
60	12	4	883326463
60	30	5	883325944
60	50	5	883326566
60	59	5	883326155
60	73	4	883326995
60	95	4	883327799
60	97	3	883326215
60	121	4	883327664
60	128	3	883326566
60	144	4	883325944
60	153	3	883326733
60	160	4	883326525
60	166	4	883326593
60	168	5	883326837
60	173	4	883326498
60	174	4	883326497
60	181	4	883326754
60	185	4	883326682
60	195	4	883326086
60	205	4	883326426
60	210	4	883326241
60	211	4	883327493
60	212	5	883327087
60	229	4	883327472
60	265	5	883327591
60	275	4	883326682
60	327	4	883325508
60	357	4	883326273
60	366	4	883327368
60	385	4	883327799
60	404	3	883327287
60	405	4	883326958
60	411	3	883327827
60	418	3	883327342
60	429	5	883326733
60	433	4	883327342
60	435	4	883326122
60	491	4	883326301
60	494	4	883326399
60	506	5	883327441
60	510	5	883327174
60	515	5	883326784
60	524	4	883325994
60	528	4	883326086
60	546	4	883326837
60	582	4	883327664
60	593	5	883326185
60	602	4	883326958
60	608	5	883326028
60	609	3	883327923
60	618	3	883327113
60	629	3	883327175
60	637	4	883327975
60	641	5	883326086
60	650	4	883327201
60	661	4	883326808
60	665	4	883326893
60	705	4	883326710
60	735	5	883327711
60	736	5	883327923
60	799	4	883326995
60	835	4	883326893
60	1050	3	883327923
60	1121	3	883326215
61	258	4	891206125
61	300	5	891206407
61	304	4	891220884
61	327	2	891206407
61	748	2	892302120
62	1	2	879372813
62	9	4	879372182
62	44	3	879374142
62	50	5	879372216
62	53	2	879376270
62	56	5	879373711
62	62	3	879375781
62	70	3	879373960
62	83	5	879375000
62	91	4	879375196
62	97	2	879373795
62	98	4	879373543
62	129	3	879372276
62	159	3	879375762
62	170	3	879373848
62	174	4	879374916
62	188	3	879373638
62	195	5	879373960
62	196	4	879374015
62	199	4	879373692
62	222	5	879372480
62	230	2	879375738
62	238	5	879373568
62	241	1	879375562
62	250	5	879372455
62	252	3	879373272
62	273	4	879371980
62	283	4	879372598
62	290	3	879373007
62	357	4	879374706
62	387	2	879376115
62	403	4	879375588
62	405	3	879373118
62	431	2	879374969
62	436	3	879375883
62	472	2	879373152
62	483	4	879373768
62	512	4	879374894
62	554	1	879375562
62	568	3	879375080
62	605	3	879375364
62	651	4	879373848
62	655	3	879375453
62	710	3	879375453
62	715	2	879375912
62	729	3	879375414
62	744	3	879372304
62	866	2	879373195
62	875	4	879371909
62	959	4	879375269
62	1009	4	879372869
62	1018	3	879375606
62	1091	3	879376709
62	1132	2	879373404
62	1134	2	879372936
63	15	3	875747439
63	108	2	875748164
63	224	4	875747635
63	258	3	875746809
63	282	1	875747657
63	286	4	875746809
63	302	3	875746809
63	333	4	875746917
63	405	4	875748109
63	475	4	875747319
63	546	2	875747789
63	591	3	875747581
63	676	3	875747470
63	741	3	875747854
63	828	1	875747936
63	929	3	875747955
63	1012	3	875747854
64	11	4	889737376
64	22	4	889737376
64	32	1	889739346
64	50	5	889737914
64	81	4	889739460
64	82	3	889740199
64	97	3	889738085
64	121	2	889739678
64	135	4	889737889
64	143	4	889739051
64	144	3	889737771
64	162	3	889739262
64	168	5	889739243
64	179	5	889739460
64	182	4	889738030
64	183	5	889737914
64	188	4	889739586
64	190	4	889737851
64	191	4	889740740
64	194	5	889737710
64	195	5	889737914
64	196	4	889737992
64	203	4	889737851
64	209	5	889737654
64	210	3	889737654
64	218	1	889739517
64	227	3	889740880
64	237	4	889740310
64	265	4	879365491
64	269	5	879365313
64	300	3	879365314
64	310	4	889737047
64	313	4	889736971
64	340	4	879365313
64	405	3	889739288
64	423	4	889739569
64	425	4	889739051
64	431	4	889737376
64	434	4	889739052
64	436	5	889739625
64	475	5	889738993
64	511	4	889739779
64	520	5	889737851
64	546	3	889739883
64	568	4	889737506
64	569	3	889740602
64	588	4	889739091
64	603	3	889737506
64	652	2	879365590
64	679	3	889740033
64	748	1	879365314
64	768	2	889739954
64	847	3	879365558
64	969	3	889737889
64	1140	1	889740676
65	15	5	879217138
65	28	4	879216734
65	50	5	879217689
65	63	2	879217913
65	65	3	879216672
65	88	4	879217942
65	168	4	879217851
65	185	4	879218449
65	238	3	879218449
65	255	3	879217406
65	258	3	879216131
65	294	4	879217320
65	365	3	879216672
65	378	5	879217032
65	393	4	879217881
65	514	4	879217998
65	651	4	879216371
65	660	5	879216880
65	735	4	879216769
65	778	4	879216949
65	956	4	879216797
66	24	3	883601582
66	50	5	883601236
66	121	3	883601834
66	127	4	883601156
66	237	4	883601355
66	248	4	883601426
66	294	4	883601089
66	295	3	883601456
66	405	3	883601990
66	508	4	883601387
66	741	4	883601664
67	24	4	875379729
67	25	4	875379420
67	105	4	875379683
67	546	3	875379288
68	25	4	876974176
68	111	3	876974276
68	121	1	876974176
68	258	5	876973692
68	275	5	876973969
68	286	5	876973692
68	409	3	876974677
68	458	1	876974048
68	475	5	876973917
69	42	5	882145548
69	50	5	882072748
69	98	5	882145375
69	123	4	882126125
69	181	5	882072778
69	235	3	882126048
69	236	4	882072827
69	237	3	882072920
69	245	1	882027284
69	246	5	882072827
69	265	4	882145400
69	273	3	882072803
69	282	3	882126048
69	294	2	882027233
69	307	2	882027204
69	475	3	882072869
69	742	3	882072956
69	763	3	882126156
69	886	4	882027284
69	1142	4	882072956
70	8	4	884064986
70	24	4	884064743
70	83	4	884065895
70	95	4	884065501
70	99	4	884067222
70	132	4	884067281
70	150	3	884065247
70	161	3	884067638
70	168	4	884065423
70	175	3	884150422
70	181	4	884064416
70	183	4	884149894
70	204	3	884066399
70	208	4	884149431
70	214	3	884067842
70	230	4	884064269
70	231	3	884064862
70	300	4	884063569
70	313	4	884063469
70	393	4	884068497
70	403	4	884064862
70	405	3	884149117
70	411	3	884066399
70	450	1	884064269
70	483	5	884064444
70	496	4	884064545
70	554	3	884068277
70	568	3	884149722
70	576	2	884065248
70	1146	3	884151576
71	14	5	877319375
71	64	4	885016536
71	175	4	885016882
71	181	3	877319414
71	197	5	885016990
71	248	3	877319446
71	257	5	877319414
71	282	3	885016990
71	357	5	885016495
72	2	3	880037376
72	7	1	880036347
72	9	5	880035636
72	15	5	880035708
72	25	5	880035588
72	77	4	880036945
72	97	4	880036638
72	98	5	880037417
72	118	3	880036346
72	134	5	880037793
72	147	5	880037702
72	170	3	880037793
72	174	5	880037702
72	194	4	880037793
72	212	5	880036946
72	220	3	880035786
72	228	1	880037204
72	229	1	880037307
72	241	4	880037242
72	318	5	880037702
72	405	3	880036346
72	443	3	880037418
72	461	3	880036824
72	476	4	880036048
72	521	4	880036718
72	525	4	880037436
72	582	4	880036783
72	591	5	880035708
72	628	4	880035857
72	655	5	880037702
72	664	3	880037020
72	792	3	880036718
73	32	4	888626220
73	59	5	888625980
73	64	5	888625042
73	135	5	888626371
73	152	3	888626496
73	153	3	888626007
73	154	5	888625343
73	171	5	888626199
73	179	5	888626041
73	213	4	888625753
73	255	2	888792938
73	269	4	888792172
73	272	4	888792247
73	289	2	888792410
73	382	4	888626496
73	650	3	888626152
74	7	4	888333458
74	258	4	888333194
74	294	4	888333311
74	313	5	888333219
74	328	4	888333280
74	351	3	888333352
74	354	3	888333194
75	1	4	884050018
75	13	5	884050102
75	25	5	884049875
75	111	4	884050502
75	114	4	884051893
75	123	3	884050164
75	196	4	884051948
75	220	1	884050705
75	225	2	884050940
75	235	4	884050502
75	294	3	884049758
75	301	4	884051510
75	304	2	884051610
75	323	2	884049789
75	405	4	884050164
75	408	4	884050046
75	413	2	884050979
75	427	4	884051921
75	477	4	884050102
75	678	3	884049758
75	685	4	884050134
75	756	2	884050309
75	825	1	884050393
75	845	3	884050194
75	926	3	884050393
75	1028	4	884050590
75	1059	1	884050760
76	7	4	875312133
76	42	3	882606243
76	56	5	875027739
76	60	4	875028007
76	77	2	882607017
76	137	5	875498777
76	172	5	882606080
76	216	4	875028624
76	318	3	882606166
76	324	4	875027206
76	343	3	882129361
76	358	2	878101114
76	513	5	882606305
76	514	4	882129456
76	547	2	882607017
76	628	2	882606768
76	769	1	882607018
76	1006	3	875027907
76	1019	3	879576256
76	1048	2	882607017
76	1155	2	882607017
76	1157	1	882607018
77	15	2	884732873
77	56	4	884752900
77	97	2	884753292
77	127	2	884732927
77	133	2	884752997
77	175	4	884733655
77	201	4	884752785
77	209	4	884752562
77	215	2	884752757
77	246	5	884732808
77	250	3	884732873
77	268	5	884733857
77	455	3	884732873
77	511	2	884753152
77	641	5	884733621
77	833	1	884733284
78	257	4	879633721
78	301	5	879633467
78	327	1	879633495
78	813	2	879633745
78	1047	1	879634199
79	19	5	891271792
79	93	2	891271676
79	116	5	891271676
79	268	5	891271792
79	306	5	891271792
79	319	4	891271278
79	333	2	891271086
79	582	5	891271806
79	690	4	891271308
79	906	5	891271792
79	1022	5	891271792
80	100	5	887401453
[truncated: 18,000 more rows]
