# Supplementary material
Source: ML conference proceedings conference paper supplement (https://proceedings.neurips.cc/paper_files/paper/2022/hash/01ecd39ca49ddecc5729ca996304781b-Abstract.html)
Supplement: Supplementary file 1 [file 01ecd39ca49ddecc5729ca996304781b-Supplemental-Conference.zip › supplementary NEURIPS 2022/CODE_supplementary/data/ml-100k/u3.test]

1	5	3	889751712
1	11	2	875072262
1	16	5	878543541
1	25	4	875071805
1	35	1	878542420
1	41	2	876892818
1	45	5	875241687
1	46	4	876893230
1	48	5	875072520
1	50	5	874965954
1	57	5	878542459
1	66	4	878543030
1	71	3	876892425
1	77	4	876893205
1	79	4	875072865
1	87	5	878543541
1	101	2	878542845
1	106	4	875241390
1	109	5	874965739
1	110	1	878542845
1	115	5	878541637
1	127	5	874965706
1	137	5	875071541
1	153	3	876893230
1	156	4	874965556
1	162	4	878542420
1	167	2	878542383
1	168	5	874965478
1	169	5	878543541
1	178	5	878543541
1	182	4	875072520
1	192	4	875072547
1	195	5	876892855
1	199	4	875072262
1	223	5	876892918
1	238	4	875072235
1	245	2	875071713
1	251	4	875071843
1	261	1	875692992
2	100	5	888552084
2	127	5	888552084
2	237	4	888552017
2	255	4	888551341
2	269	4	888550774
2	274	3	888551497
2	284	4	888552017
2	285	5	888552084
2	300	4	888979197
2	311	5	888552084
3	271	3	889237224
3	319	2	889237026
3	325	1	889237297
3	326	2	889237224
3	333	2	889236939
3	344	4	889236939
3	352	2	889237055
4	11	4	892004520
4	327	5	892002352
5	121	4	875635189
5	145	1	875720830
5	169	5	878844495
5	189	5	878844495
5	204	4	875636675
5	216	1	875720967
5	228	5	875636070
5	235	4	875635384
5	250	3	875635265
5	365	1	875637144
5	374	3	875636905
5	386	2	875636230
5	387	3	875637419
5	396	5	875636265
5	398	2	875636167
5	409	2	878844651
5	420	3	875721168
5	431	3	875636099
5	438	1	878844423
5	446	4	875720845
5	447	3	875720744
5	450	1	875635962
6	1	4	883599478
6	7	2	883599102
6	71	4	883601053
6	79	3	883600747
6	89	4	883600842
6	127	5	883599134
6	132	5	883602422
6	153	4	883603013
6	168	4	883602865
6	173	5	883602462
6	185	5	883601393
6	192	4	883600914
6	242	4	883268170
6	257	2	883599478
6	268	3	883268406
6	298	3	883599558
6	302	4	883268222
6	303	3	883268321
6	308	3	883600445
6	309	2	883268430
6	317	3	883602174
6	425	3	883602865
6	460	2	883600004
6	462	5	883600914
6	472	1	883600003
6	489	5	883601011
6	491	4	883602174
6	502	4	883602664
6	519	5	883601365
6	527	4	883600877
6	535	2	883600030
7	4	5	891351772
7	25	3	891352451
7	68	4	891351547
7	73	3	892133154
7	141	5	891353444
7	145	1	891354530
7	180	5	891350782
7	186	4	891350900
7	202	3	891352947
7	204	5	891351121
7	214	5	891352384
7	230	3	891353326
7	238	5	891351814
7	356	4	891351728
7	384	3	891353710
7	386	4	892133310
7	387	3	892133670
7	402	5	891352904
7	417	3	892132652
7	433	5	892135347
7	434	4	891352384
7	444	5	891354288
7	452	5	891353860
7	470	3	891352489
7	474	5	891351002
7	487	3	891352178
7	502	5	891352261
7	503	4	891353950
7	506	5	891353614
7	510	5	891352134
7	513	4	891351772
7	523	4	891350845
7	540	3	892132972
7	544	3	891353254
7	545	2	891354882
7	551	1	892131978
7	566	4	891353411
7	568	5	891352261
7	575	3	892133271
7	591	3	891352179
7	594	3	891354114
7	601	5	891353744
7	605	4	891353290
7	606	3	891352904
7	625	3	892131824
7	631	4	891352984
7	634	5	891351287
7	635	3	891352864
7	638	4	892132122
7	640	3	891353614
7	641	5	892135346
7	649	5	891353254
7	652	3	891352659
7	655	5	891351384
7	666	4	892132192
7	668	4	891352778
7	670	5	891353254
7	671	5	891351728
7	672	1	892131925
8	96	3	879362183
8	177	4	879362233
8	181	4	879362183
8	187	4	879362123
8	227	4	879362423
8	403	4	879362234
8	688	1	879361732
9	242	4	886958715
9	371	5	886960055
10	59	4	877886722
10	60	3	877892110
10	69	4	877889131
10	170	4	877889333
10	185	5	877888876
10	197	5	877888944
10	273	4	877888613
10	276	4	877891904
10	319	3	877886223
10	478	5	877889004
10	499	4	877893021
10	530	4	877892210
10	582	4	877892276
10	602	5	877889057
10	629	4	877886722
10	693	4	877886783
10	701	4	877888812
10	708	4	877892438
11	15	5	891903067
11	25	3	891903836
11	29	3	891904805
11	42	3	891905058
11	54	3	891905936
11	123	3	891902745
11	125	4	891903108
11	208	4	891905032
11	332	5	891901769
11	367	3	891905058
11	430	3	891905032
11	434	4	891904270
11	504	3	891905856
11	526	3	891904859
11	527	4	891904335
11	603	4	891905783
11	646	3	891904389
11	662	3	891904300
11	690	4	891901716
11	715	3	891904764
11	717	2	891902815
11	724	3	891904551
11	738	3	891905324
12	4	5	879960826
12	98	5	879959068
12	161	5	879959553
12	174	5	879958969
12	215	4	879959553
12	228	4	879959465
12	416	3	879959025
13	22	4	882140487
13	33	5	882397581
13	37	1	882397011
13	39	3	882397581
13	50	5	882140001
13	58	4	882139966
13	67	1	882141686
13	70	3	882140691
13	82	2	882397503
13	86	1	881515348
13	87	5	882398814
13	128	1	882397502
13	157	3	882140552
13	160	4	882140070
13	163	3	882141582
13	164	3	882396790
13	179	2	882140206
13	197	4	881515239
13	199	5	882140001
13	205	2	881515193
13	223	5	882139901
13	224	4	882140166
13	227	5	882397650
13	228	4	882140389
13	231	3	882397582
13	264	4	882140848
13	279	5	882139804
13	299	3	881515698
13	306	3	881514876
13	307	2	881514684
13	346	4	883670552
13	348	2	886952246
13	367	3	882141458
13	398	2	882398410
13	406	1	882397011
13	410	1	882141997
13	411	2	882141924
13	439	1	882397040
13	444	4	882396984
13	448	1	882396869
13	453	2	882397067
13	455	3	882141425
13	471	1	882140455
13	473	4	882398724
13	485	1	882140624
13	492	5	882140552
13	507	1	882140070
13	510	5	882139717
13	561	1	882396914
13	568	3	882140552
13	572	2	882398255
13	573	3	882396955
13	576	3	882398076
13	586	3	882398326
13	602	4	884538634
13	630	2	886302261
13	631	3	882140624
13	635	1	882396984
13	636	2	882397502
13	638	3	881515239
13	650	2	882140425
13	655	5	886261387
13	656	5	882139746
13	657	4	882139829
13	667	1	882397040
13	668	1	882397068
13	670	3	882396955
13	675	5	882396955
13	684	5	882397271
13	687	1	883670705
13	692	4	882141659
13	736	4	882399528
13	748	4	882140792
13	758	1	882397084
13	761	4	882398076
13	762	5	882141336
13	771	3	882398410
13	775	4	886304188
13	789	5	882140389
13	797	5	882398327
13	806	5	882140426
13	815	4	886303934
13	818	3	882141814
13	832	4	882399156
13	835	3	882139901
13	865	5	882141425
13	873	1	881515565
13	881	2	881514876
13	886	5	881515613
13	891	1	892015288
13	895	1	883670515
13	896	5	891036745
13	897	1	886952422
14	81	5	890881384
14	173	4	879119579
14	191	4	890881557
14	265	3	890881216
14	302	5	890880970
14	762	3	876964936
14	923	5	890881294
15	111	4	879455914
15	220	4	879456262
15	237	3	879455871
15	328	3	879455192
15	925	2	879455764
15	931	1	879456507
15	934	4	879456507
16	15	5	877722001
16	71	5	877721071
16	87	4	877720916
16	98	5	877718107
16	125	3	877726944
16	152	4	877728417
16	158	4	877727280
16	172	5	877724726
16	180	5	877726790
16	227	5	877727193
16	273	5	877722736
16	302	5	877716993
16	321	3	877717116
16	423	5	877721142
16	448	5	877722736
16	476	3	877720437
16	583	4	877720186
16	661	4	877726789
16	684	5	877719863
16	945	4	877719158
17	7	4	885272487
17	100	4	885272520
17	111	3	885272674
17	126	4	885272724
17	471	2	885272779
17	919	4	885272696
18	23	4	880130065
18	81	3	880130890
18	111	3	880131631
18	175	4	880130431
18	178	3	880129628
18	189	5	880129816
18	197	4	880130109
18	204	3	880131407
18	208	4	880131004
18	221	5	880129816
18	223	5	880129731
18	269	5	880129305
18	386	2	880131986
18	411	3	880131986
18	414	4	880131054
18	427	5	880129421
18	434	3	880131297
18	482	5	880130582
18	489	4	880129769
18	492	4	880131054
18	517	2	880129388
18	528	4	880129489
18	529	5	880130515
18	549	4	880131173
18	603	3	880129388
18	614	4	880130861
18	631	5	880129691
18	702	3	880131407
18	704	3	880131986
18	737	3	880132055
18	747	3	880132225
18	753	4	880129816
18	956	5	880131525
18	957	3	880132188
18	963	5	880132437
19	202	4	885412723
20	143	3	879669040
20	148	5	879668713
20	274	4	879668248
20	378	3	879669630
20	496	5	879669244
21	50	3	874951131
21	185	5	874951658
21	259	2	874951005
21	260	2	874950972
21	379	3	874951820
21	437	1	874951858
21	438	1	874951858
21	444	3	874951859
21	564	3	874951797
21	573	2	874951898
21	637	4	874951695
21	656	5	874951797
21	800	1	874951727
21	817	3	874951695
21	853	5	874951658
21	975	3	874951447
21	978	1	874951483
21	983	2	874951416
21	992	2	874951349
21	994	2	874951104
22	2	2	878887925
22	17	4	878886682
22	89	5	878887680
22	144	5	878887680
22	161	4	878887925
22	181	5	878887765
22	201	4	878886449
22	210	3	878886479
22	228	4	878887810
22	290	5	878886607
22	384	3	878887413
22	430	4	878886607
22	566	3	878888145
22	568	4	878887810
22	688	1	878886307
22	712	4	878887186
22	1000	3	878886333
23	8	4	874785474
23	55	4	874785624
23	62	3	874786880
23	96	4	874785551
23	102	3	874785957
23	131	4	884550021
23	144	3	874785926
23	153	4	874786438
23	162	3	874786950
23	171	5	874785809
23	194	4	874786016
23	211	4	874786512
23	214	3	874785701
23	216	4	874787204
23	217	2	874787144
23	234	2	874785624
23	235	1	874784712
23	479	5	874785728
23	526	3	874787116
23	541	4	876785720
23	655	3	874787330
23	694	4	884550049
23	713	4	874784337
24	12	5	875323711
24	71	5	875323833
24	79	4	875322796
24	92	5	875323241
24	98	5	875323401
24	132	3	875323274
24	288	3	875245985
24	402	4	875323308
25	23	4	885852529
25	98	5	885853415
25	183	4	885852008
25	404	3	885852920
25	430	4	885852920
25	463	4	885852529
25	495	4	885852862
25	604	4	885852008
25	929	4	885852178
26	111	3	891371437
26	116	2	891352941
26	148	3	891377540
26	249	2	891377609
26	250	3	891350826
26	252	3	891385569
26	274	3	891385634
26	283	3	891371437
26	313	5	891386368
26	456	1	891386174
26	591	3	891351590
26	678	2	891349122
26	815	2	891371597
26	840	2	891386049
28	28	4	881956853
28	185	5	881957002
28	288	5	882826398
28	322	2	881955343
28	332	2	881954915
28	447	3	881961532
28	573	4	881961842
29	12	5	882821989
29	182	4	882821989
29	264	3	882820897
29	268	5	882820686
29	326	2	882820869
30	50	3	875061066
30	161	4	875060883
30	252	3	875140740
30	257	4	885941257
30	313	5	885941156
30	321	4	875988547
30	683	3	885941798
31	136	5	881548030
31	153	4	881548110
31	262	5	881547766
31	271	4	881547854
31	303	3	881547719
31	811	4	881548053
31	1020	3	881548030
32	111	3	883717986
32	268	5	883709797
32	298	5	883717581
33	271	4	891964166
33	323	4	891964373
33	339	3	891964111
34	990	5	888602808
35	326	3	875459017
35	327	3	875459017
35	333	4	875459017
35	748	4	875458970
37	96	4	880915810
37	172	4	880930072
37	385	4	880915902
37	405	4	880915565
37	827	3	880915607
37	833	4	880915565
37	841	3	880915711
37	930	3	880915711
37	1027	3	880930072
38	78	5	892433062
38	144	5	892430369
38	155	5	892432090
38	202	2	892431665
38	400	1	892434036
38	401	3	892434585
38	409	5	892433135
38	410	3	892432750
38	411	3	892433290
38	452	5	892434523
38	501	5	892429801
38	717	1	892433945
38	1031	5	892433801
39	272	2	891400094
39	294	4	891400609
39	307	2	891400342
39	748	5	891400704
40	242	4	889041330
40	259	2	889041643
40	272	2	889041283
40	300	3	889041523
40	310	3	889041283
40	321	4	889041523
40	328	3	889041595
40	358	3	889041741
40	876	3	889041694
41	58	3	890687353
41	97	3	890687665
41	168	5	890687304
41	238	5	890687472
41	276	2	890687304
41	357	4	890687175
41	1039	3	890687642
42	38	3	881109148
42	50	5	881107178
42	64	5	881106711
42	135	4	881109148
42	151	4	881110578
42	227	4	881109060
42	239	5	881108187
42	273	3	881105817
42	284	3	881105581
42	294	4	881105296
42	318	5	881107718
42	369	4	881105931
42	462	2	881108093
42	467	3	881108425
42	468	4	881108346
42	491	3	881106711
42	523	5	881107375
42	660	3	881108484
42	926	3	881105766
42	1046	3	881108760
43	8	4	875975717
43	12	5	883955048
43	28	4	875981452
43	58	3	883955859
43	69	4	875981421
43	121	4	883955907
43	131	3	883954997
43	168	4	875981159
43	174	4	875975687
43	186	3	875981335
43	222	4	883955547
43	248	4	875975237
43	258	5	875975028
43	294	5	875975061
43	301	5	875975135
43	354	4	891293957
43	367	4	883956494
43	411	3	884029519
43	418	4	883955387
43	473	3	884029309
43	482	4	875981421
43	491	4	883954997
43	539	3	883953716
43	550	3	883956040
43	566	3	883955969
43	581	3	883956468
43	625	4	883956146
43	699	4	883956040
43	729	4	883956387
43	747	4	883956169
43	926	2	875975613
43	969	5	875981159
44	7	5	878341246
44	64	5	878347915
44	67	3	878348111
44	102	2	878348499
44	144	4	878347532
44	163	4	878348627
44	197	4	878347420
44	222	4	883613334
44	298	2	883612726
44	447	4	878347598
44	480	4	878347315
44	496	4	878348885
44	553	3	878347847
44	636	4	878348969
45	7	3	881008080
45	151	2	881013885
45	257	5	881008781
45	282	4	881008636
45	288	3	880996629
45	597	3	881014070
45	1001	3	881014785
45	1059	2	881014417
46	100	4	883616134
46	305	5	883614766
47	289	4	879439040
47	322	2	879439078
47	874	3	879439078
48	56	3	879434723
48	194	4	879434819
48	289	1	879434252
48	357	5	879434653
48	524	3	879434723
48	529	4	879434850
49	8	3	888067691
49	25	2	888068791
49	57	4	888066571
49	77	1	888068289
49	85	3	888068934
49	93	5	888068912
49	161	1	888069513
49	171	4	888066551
49	181	1	888067765
49	182	3	888069416
49	239	2	888068912
49	240	3	888067031
49	287	4	888068842
49	320	5	888067334
49	324	4	888065702
49	328	2	888068651
49	358	1	888065805
49	372	4	888069040
49	396	4	888067482
49	428	5	888068791
49	432	5	888066979
49	501	3	888066979
49	725	2	888069354
49	919	5	888066133
49	997	1	888069117
49	1036	2	888069304
49	1074	2	888069165
49	1075	2	888066424
49	1079	1	888069165
49	1081	3	888069246
50	15	2	877052438
50	124	1	877052400
50	327	3	877052093
50	544	4	877052937
51	134	2	883498844
51	136	4	883498756
51	144	5	883498894
51	172	5	883498936
51	184	3	883498685
51	210	4	883498844
51	655	3	883498728
52	25	5	882922562
52	100	4	882922204
52	107	4	882922540
52	302	4	882922065
52	318	5	882922974
52	473	4	882922661
52	741	4	882922302
52	919	5	882922140
53	25	4	879442538
53	50	4	879442978
53	151	4	879443011
53	156	4	879442561
53	257	4	879443188
53	284	2	879442901
54	100	5	880931595
54	117	5	880935384
54	252	3	880937630
54	307	4	891813846
54	346	4	890608303
55	22	5	878176397
55	50	4	878176005
55	79	5	878176398
55	121	3	878176084
56	22	5	892676376
56	42	4	892676933
56	53	3	892679163
56	62	5	892910890
56	87	4	892678508
56	89	4	892676314
56	144	5	892910796
56	153	4	892911144
56	204	5	892676908
56	226	4	892679277
56	227	3	892676430
56	229	3	892676340
56	233	1	892679308
56	237	5	892679540
56	265	4	892676314
56	300	4	892675935
56	373	4	892910950
56	385	4	892676429
56	395	3	892911625
56	421	4	892677186
56	443	4	892679144
56	473	2	892683323
56	501	3	892737210
56	578	3	892910860
56	596	4	892683275
56	655	4	892676996
56	732	4	892677147
56	969	3	892683303
56	1028	4	892911227
57	240	2	883697512
57	258	5	883698581
57	288	4	883696347
57	471	4	883697134
57	473	3	883697916
57	475	2	883697223
57	496	4	883698362
57	678	3	883696547
57	1001	1	883698039
58	25	4	884304570
58	98	4	884304747
58	135	4	884305150
58	151	3	884304553
58	153	5	884304896
58	169	4	884304936
58	181	3	884304447
58	199	4	891611501
58	210	4	884305042
58	213	5	884663379
58	249	4	892242272
58	255	4	890321652
58	313	5	884304267
58	367	5	892243053
58	405	2	892242047
58	462	4	884304865
58	497	2	884305123
58	603	5	884304812
58	651	4	884305185
58	655	5	884304865
58	773	4	884304790
58	1063	1	884304728
58	1084	4	884304896
59	32	4	888205228
59	96	5	888205659
59	97	5	888205921
59	106	4	888203959
59	133	3	888204349
59	179	5	888204996
59	180	4	888204597
59	184	4	888206094
59	185	5	888205228
59	187	5	888204349
59	190	5	888205033
59	191	4	888204841
59	197	5	888205462
59	198	5	888204389
59	212	4	888205463
59	228	4	888205714
59	240	2	888203579
59	277	4	888203234
59	290	3	888203750
59	313	5	888202532
59	321	4	888206764
59	369	2	888203959
59	371	4	888206095
59	402	4	888206296
59	425	4	888204928
59	430	5	888205228
59	458	4	888203128
59	465	2	888206363
59	474	5	888204430
59	479	5	888205370
59	503	4	888205855
59	504	5	888205921
59	510	4	888204502
59	584	4	888205145
59	591	4	888203270
59	616	5	888206049
59	622	4	888206015
59	633	3	888204641
59	644	4	888205033
59	662	3	888206125
59	672	5	888206015
59	679	4	888205714
59	684	3	888204553
59	687	1	888206764
59	705	4	888205087
59	736	5	888205145
59	755	4	888206254
59	774	2	888206562
59	789	4	888205087
59	792	4	888206362
59	900	4	888202814
59	1048	4	888203270
59	1111	5	888204758
60	7	5	883326241
60	9	5	883326399
60	23	4	883326652
60	69	4	883326215
60	70	4	883326838
60	89	5	883326463
60	96	4	883326122
60	131	4	883327441
60	136	4	883326057
60	204	4	883326086
60	209	5	883326593
60	215	4	883327566
60	225	3	883327976
60	227	4	883326784
60	230	4	883327441
60	286	5	883325421
60	378	4	883327566
60	393	4	883327754
60	434	5	883327368
60	445	5	883326273
60	479	5	883326301
60	482	4	883326958
60	513	5	883325994
60	615	5	883326215
60	617	4	883326273
60	656	4	883327018
60	675	4	883326995
60	684	4	883328033
60	708	4	883326784
60	745	5	883327442
60	755	4	883327639
60	1060	4	883326995
60	1125	4	883326497
61	269	3	891206125
61	271	1	892302231
61	333	3	891206232
62	13	4	879372634
62	69	4	879374015
62	71	4	879374661
62	81	4	879375323
62	82	4	879375414
62	127	4	879372216
62	128	2	879374866
62	144	3	879374785
62	210	4	879374640
62	245	2	879373232
62	380	5	879375626
62	402	3	879375883
62	463	4	879374916
62	474	4	879373613
62	521	5	879374706
62	569	1	879376158
62	582	4	879374753
62	597	2	879373254
62	652	4	879375364
62	676	3	879372633
62	699	4	879375022
62	708	3	879375912
62	723	2	879375738
62	949	4	879376210
62	1077	3	879374607
62	1129	5	879372060
62	1130	4	879376686
62	1135	2	879376159
63	1	3	875747368
63	25	4	875747292
63	284	3	875747581
63	287	3	875747829
63	321	3	875746917
63	325	2	875747047
63	473	2	875747635
63	480	3	875748245
63	596	2	875747470
63	713	3	875747556
63	813	5	875747265
63	1010	3	875747829
64	31	4	889739318
64	89	3	889737376
64	91	4	889739733
64	98	4	889737654
64	101	2	889740225
64	127	5	879366214
64	141	4	889739517
64	153	3	889739243
64	185	4	889739517
64	186	4	889737691
64	228	4	889739438
64	235	4	889740567
64	271	3	889737047
64	273	2	889739381
64	288	4	879365313
64	384	2	889740367
64	419	2	889740310
64	531	3	889740718
64	559	3	889740310
64	650	3	889740225
64	751	2	889737047
65	1	3	879217290
65	69	3	879216479
65	73	4	879217998
65	87	5	879217689
65	98	4	879218418
65	179	3	879216605
65	215	5	879217689
65	356	5	879216825
65	402	4	879216949
65	423	5	879216702
65	476	3	879217290
65	511	4	879216567
65	531	4	879218328
65	655	4	879216769
65	1044	3	879217002
66	286	1	883601089
66	763	4	883602094
66	825	3	883602268
67	125	4	875379643
67	235	3	875379643
67	412	1	875379540
67	1052	3	875379419
68	596	2	876974023
68	763	1	876973917
68	1089	1	876974484
69	7	5	882126086
69	117	4	882072748
69	124	4	882072869
69	182	4	882145400
69	197	5	882145548
69	234	5	882145505
69	289	4	882027133
69	298	4	882072998
69	302	4	882027109
69	879	1	882027284
69	1016	3	882072956
69	1144	5	882126156
70	15	3	884148728
70	28	4	884065757
70	63	3	884151168
70	88	4	884067394
70	101	3	884150753
70	135	4	884065387
70	142	3	884150884
70	143	5	884149431
70	173	4	884149452
70	174	5	884065782
70	222	4	884064269
70	225	3	884148916
70	264	4	884063668
70	289	3	884066399
70	404	4	884149622
70	408	4	884152129
70	429	3	884150369
70	501	4	884067201
70	507	4	884066886
70	538	2	884066399
70	597	3	884148999
70	755	3	884150865
71	174	2	877319610
71	177	2	885016961
71	429	4	877319610
71	744	4	877319294
72	5	4	880037418
72	50	2	880037119
72	56	5	880037702
72	69	4	880036579
72	187	4	880036638
72	191	5	880036515
72	222	1	880036346
72	233	4	880037242
72	380	1	880036854
72	402	4	880036824
72	466	4	880037461
72	471	4	880035588
72	553	5	880036638
72	647	1	880036550
72	684	4	880037203
72	685	4	880035588
72	972	4	880036911
72	1147	5	880036783
73	1	2	888626065
73	82	2	888625754
73	175	5	888625785
73	187	5	888625934
73	268	3	888625754
73	433	4	888626437
73	660	4	888625754
73	683	2	888792535
73	748	2	888792247
74	13	4	888333542
74	245	3	888333280
74	276	4	888333458
74	302	4	888333219
74	307	4	888333329
74	340	5	888333194
74	539	3	888333255
74	690	4	888333352
75	56	5	884051921
75	322	1	884049789
75	831	3	884051056
76	6	5	875028165
76	70	4	875027981
76	93	4	882606572
76	129	3	878101114
76	192	5	875027442
76	223	2	882606623
76	270	3	879117602
76	517	5	882129432
76	1071	3	882606017
76	1153	2	882607017
77	1	5	884732808
77	25	2	884733055
77	31	3	884753292
77	96	3	884752562
77	132	3	884753028
77	154	5	884733922
77	252	1	884733379
78	25	3	879633785
78	93	4	879633766
78	237	5	879634264
78	288	4	879633467
78	294	3	879633495
78	871	3	879634199
78	880	5	879633600
79	257	3	891271545
79	258	5	891271308
79	283	4	891271627
79	340	4	891271180
79	676	3	891271957
79	902	3	891271086
80	86	5	887401496
80	205	5	887401533
80	237	4	887401732
80	514	3	887401533
80	531	4	887401430
81	25	5	876533946
81	186	5	876534783
81	269	3	876533229
81	276	4	876533545
81	284	3	876533894
81	288	3	876533229
81	596	3	876533824
81	1059	3	876534366
82	1	4	876311241
82	7	3	876311217
82	71	4	878770169
82	79	3	878769334
82	133	4	878769410
82	169	4	878769442
82	175	4	878769598
82	197	4	878769847
82	235	1	876311517
82	274	3	876311492
82	286	4	876311004
82	304	3	884713664
82	367	4	878769848
82	412	1	884714513
82	473	2	878768765
82	474	3	878769597
82	475	1	884714181
82	496	4	878769992
82	539	3	884713704
82	546	3	876311423
82	678	1	884714726
82	822	2	878769262
82	946	2	878769748
82	1063	3	878769815
82	1078	3	878769748
82	1128	1	884714361
83	31	5	880307751
83	38	5	887665422
83	56	1	886534501
83	225	3	880307208
83	235	1	883867920
83	243	3	891181725
83	259	2	883869199
83	298	4	891181511
83	300	3	889050543
83	319	1	886532955
83	356	4	880308755
83	393	5	887665423
83	409	4	880307417
83	566	4	880308099
83	820	2	881971231
83	828	3	883868208
83	862	4	883868805
83	864	4	883954588
83	993	2	883868978
84	87	5	883453587
84	258	4	883449347
84	273	4	883452086
84	286	5	883449271
84	411	2	883452516
84	466	4	883453148
84	486	5	883453664
84	628	3	883450434
84	744	4	883449965
84	823	3	883452672
85	23	4	879454272
85	50	5	882813248
85	52	3	881705026
85	65	3	879455021
85	82	3	879454633
85	87	4	879829327
85	121	2	879453167
85	132	5	879453965
85	135	5	879453845
85	136	4	879454349
85	152	5	879454751
85	173	3	879454045
85	174	4	879454139
85	221	2	879452693
85	230	3	882813248
85	231	2	882995615
85	232	3	882995966
85	238	2	879453965
85	246	4	881704999
85	328	3	884906441
85	357	4	879454045
85	419	5	882819427
85	478	4	879454951
85	483	5	879453933
85	504	4	879453748
85	513	4	879454350
85	521	3	879829471
85	526	4	879454500
85	531	4	879454112
85	582	4	879828014
85	589	3	879453587
85	596	3	880838337
85	606	4	886282959
85	657	4	879454189
85	707	4	879454350
85	710	2	879828912
85	732	3	879455238
85	735	3	879454905
85	782	2	879829757
85	822	3	880581629
85	845	3	879828456
85	923	4	879455403
85	924	1	879453114
85	1136	3	879455402
85	1171	3	879452638
85	1174	3	879454633
86	242	4	879569486
86	269	4	879569486
86	304	3	879570149
86	338	1	879570277
87	13	3	879876734
87	27	4	879876037
87	47	3	879876637
87	72	3	879876848
87	153	5	879876703
87	158	3	879877173
87	179	4	879875649
87	195	5	879875736
87	273	3	879875857
87	410	4	879876565
87	423	3	879877710
87	472	4	879875996
87	496	5	879877709
87	514	4	879876672
87	535	4	879876315
87	577	4	879877127
87	578	3	879875940
87	692	5	879876565
87	709	3	879876812
87	802	4	879875940
87	808	3	879875996
87	845	4	879876564
87	926	4	879877043
87	944	5	879876848
87	1028	4	879876946
87	1179	3	879877127
87	1185	4	879876885
87	1188	2	879876110
88	286	5	891037111
88	354	5	891037708
88	880	3	891037466
88	898	4	891037859
89	1	5	879461219
89	49	4	879460347
89	50	5	879461219
89	88	4	879459980
89	181	4	879441491
89	222	5	879441491
89	235	5	879441657
89	236	5	879441400
89	475	5	879441307
89	709	3	879459980
89	731	3	879460347
89	736	3	879460027
89	1119	3	879459884
90	8	5	891383424
90	10	5	891383987
90	56	5	891384516
90	57	5	891385389
90	59	5	891383173
90	64	4	891383912
90	65	4	891385298
90	97	5	891383987
90	126	2	891384611
90	133	5	891384147
90	134	5	891383204
90	141	5	891385899
90	154	5	891384516
90	194	5	891383424
90	208	3	891384065
90	211	5	891383424
90	218	5	891385899
90	221	4	891383987
90	234	4	891383835
90	322	4	891382658
90	340	4	891382121
90	385	4	891385899
90	387	5	891385215
90	402	5	891385335
90	447	5	891385389
90	454	2	891383423
90	482	5	891383204
90	490	5	891383753
90	496	4	891385787
90	519	5	891384423
90	523	4	891383423
90	527	5	891384959
90	530	3	891385522
90	610	5	891383753
90	647	5	891383204
90	654	5	891384357
90	660	4	891385652
90	676	2	891384066
90	699	4	891385298
90	732	5	891383241
90	836	5	891385190
90	1005	2	891383912
90	1039	5	891383599
90	1196	4	891383599
90	1204	4	891384959
90	1205	3	891383687
91	22	5	891439208
91	56	1	891439057
91	143	4	891439386
91	192	4	891439302
91	204	4	891438909
91	328	4	891438245
91	501	2	891439130
91	601	4	891439171
91	651	5	891439057
91	657	4	891439130
91	735	4	891439503
91	750	5	891438209
91	1126	1	891439301
92	1	4	875810511
92	8	5	875654159
92	9	4	875640148
92	47	4	875654732
92	49	3	875907416
92	51	4	875812305
92	55	3	875654245
92	58	4	875653836
92	68	3	875653699
92	72	3	875658159
92	95	3	875653664
92	116	3	875640251
92	174	5	875654189
92	179	5	875653077
92	186	4	875653960
92	193	4	875654222
92	202	3	875653805
92	210	4	875653519
92	227	1	875654846
92	235	3	875640338
92	243	1	875644795
92	245	4	877966971
92	250	4	890251534
92	257	2	875640273
92	258	4	886440479
92	268	4	890251912
92	274	4	876175626
92	282	4	876769303
92	307	4	892655699
92	363	3	886443455
92	382	4	875656317
92	383	1	876175191
92	428	4	875653519
92	432	3	876175031
92	436	4	875654534
92	466	4	875811549
92	566	4	875658112
92	575	2	875907763
92	583	3	875907134
92	627	3	875654159
92	636	3	875812064
92	658	3	875654353
92	684	3	875656502
92	735	3	875656121
92	743	2	890251826
92	758	1	875644796
92	771	1	875907180
92	783	3	875907574
92	789	5	875653242
92	934	2	875639642
92	974	2	886443626
92	984	2	888469687
92	1023	2	892655775
92	1042	3	875907079
92	1074	3	875907535
92	1090	3	875907079
93	121	3	888705053
94	4	4	891721168
94	32	5	891721851
94	42	4	885870577
94	69	3	885870057
94	72	3	891723220
94	121	2	891721815
94	164	3	891721528
94	181	4	885872942
94	194	4	885870284
94	196	4	891721462
94	201	4	891721378
94	210	4	886008459
94	215	4	891722174
94	228	4	891720996
94	250	4	891724257
94	286	4	891724122
94	302	4	891928684
94	317	5	885873653
94	328	3	891724990
94	368	2	891724846
94	417	3	891722799
94	418	3	891721317
94	433	4	891721078
94	435	4	885870418
94	436	5	891721815
94	464	5	885873302
94	469	4	891721048
94	477	2	885870323
94	501	4	891721642
94	504	5	885870612
94	544	3	891721562
94	553	3	891722511
94	654	5	885872684
94	658	3	891722533
94	679	4	891722006
94	692	4	891722249
94	710	3	891721117
94	735	5	891721528
94	736	5	891721077
94	780	3	891723558
94	813	5	891720786
94	928	3	891723774
94	930	2	891724747
94	944	1	891723619
94	951	3	891722214
94	959	5	891725332
94	1011	4	891722214
94	1012	4	891724100
94	1046	2	891723262
94	1058	4	891722609
94	1110	4	891722801
94	1188	3	891723525
94	1211	5	891722458
94	1225	3	891723262
95	22	4	888953953
95	58	3	879197834
95	65	4	879197918
95	67	2	879198109
95	95	3	879198109
95	97	4	879198652
95	102	4	880572474
95	133	3	888954341
95	139	4	880572250
95	177	3	879196408
95	196	4	879198354
95	197	4	888954243
95	209	4	879197021
95	216	5	880573287
95	228	4	879196231
95	237	2	879192708
95	257	5	879197329
95	389	4	880572388
95	405	3	879194159
95	465	3	882803918
95	485	5	888954129
95	495	4	888954760
95	665	2	879196666
95	692	4	879198482
95	707	3	880572009
95	781	2	880572495
95	960	2	888954129
95	1047	3	879193881
95	1126	4	879197445
95	1228	3	880572689
96	83	3	884403758
96	89	5	884402896
96	127	5	884403214
96	144	4	884403250
96	183	4	884403123
97	23	5	884239553
97	83	1	884238817
97	100	2	884238778
97	133	1	884239655
97	169	5	884238887
97	186	3	884239574
97	195	5	884238966
97	434	4	884239791
97	496	2	884238693
97	603	4	884238817
98	152	3	880498968
98	435	5	880498967
98	502	2	880499053
99	105	2	885679353
99	120	2	885679472
99	147	5	885678997
99	173	4	885680062
99	210	5	885679705
99	240	4	885679279
99	282	3	885678753
99	290	4	886518628
99	313	5	885678348
99	651	5	885679833
99	780	5	886780007
99	931	2	886780147
99	975	3	885679472
99	1079	3	885679504
99	1132	4	885679319
100	258	4	891374675
100	269	4	891374641
100	270	3	891375016
100	272	4	891375629
100	294	4	891375313
100	326	3	891375630
100	881	1	891375186
100	886	3	891375522
100	900	4	891374832
100	1233	3	891375112
101	125	4	877137015
101	151	3	877136628
101	278	2	877136737
101	288	4	877137015
101	370	2	877136711
101	411	2	877136891
101	412	2	877136842
101	717	3	877136928
101	820	3	877136954
101	826	3	877136686
101	846	3	877135914
101	926	3	877136628
101	979	2	877136711
101	1009	2	877136598
102	13	3	892991118
102	49	2	892992129
102	68	2	888801673
102	73	3	892992297
102	88	3	892991311
102	95	4	883748488
102	117	3	888801232
102	200	3	888803051
102	219	2	888803149
102	226	2	888801673
102	258	4	875886337
102	265	3	888801622
102	269	2	891427996
102	273	3	888801465
102	288	2	887051621
102	328	2	883277645
102	334	2	888295889
102	396	2	892993735
102	411	2	892993786
102	431	3	888801407
102	476	3	892993827
102	522	3	888803487
102	541	2	888801673
102	546	3	888801876
102	596	2	883748352
102	612	4	879082395
102	655	3	888803802
102	856	2	892993927
103	118	3	880420002
103	181	4	880415875
103	211	3	880420565
103	487	4	880421001
104	15	5	888465413
104	50	5	888465972
104	124	2	888465226
104	127	3	888465201
104	250	3	888465972
104	270	4	888442337
104	271	1	888442370
104	272	4	888441878
104	330	1	888442530
104	332	2	888442305
104	591	4	888465263
104	750	5	888442171
104	825	1	888466028
104	847	2	888465263
104	871	2	888465853
104	895	2	888442507
104	926	1	888465936
104	1028	2	888465818
106	14	4	881449486
106	28	4	881451144
106	191	5	881451453
106	244	4	883877094
106	495	4	881451016
106	566	4	881452711
106	647	3	881450440
106	739	3	881453290
107	259	2	891264630
107	264	3	891264598
107	312	4	891264535
108	124	4	879879757
108	405	3	879880157
108	740	3	879880055
108	931	2	879880190
109	15	4	880577868
109	17	4	880582132
109	54	3	880578286
109	81	2	880580030
109	95	4	880572721
109	111	4	880564570
109	161	3	880572756
109	168	3	880577734
109	186	3	880572786
109	191	4	880577844
109	202	5	880578632
109	210	5	880573084
109	222	4	880563471
109	227	5	880579417
109	229	5	880578632
109	234	4	880578286
109	238	2	880580637
109	288	5	880562908
109	317	2	880573085
109	365	4	880581817
109	367	3	880578121
109	391	2	880581127
109	395	3	880583672
109	405	5	880564640
109	431	3	880578186
109	508	4	880571629
109	527	3	880577604
109	542	3	880582045
109	545	2	880583493
109	564	3	880582633
109	576	3	880580663
109	636	5	880581817
109	655	3	880577735
109	679	3	880578093
109	715	2	880583519
109	732	3	880572588
109	748	3	880562908
109	755	5	880578814
109	834	3	880583308
110	12	4	886987826
110	43	3	886988100
110	88	4	886988967
110	161	5	886988631
110	184	1	886988631
110	272	4	886987145
110	326	4	886987417
110	333	4	886987288
110	366	3	886988341
110	385	3	886988574
110	393	3	886989363
110	397	3	886988688
110	468	3	886988202
110	566	4	886988574
110	642	2	886989126
110	692	4	886988937
110	808	2	886988250
110	1090	2	886989191
110	1182	2	886989566
111	302	5	891679971
111	305	2	891680243
111	315	5	891679692
111	354	4	891679692
112	245	4	884992691
112	272	5	886398204
112	294	3	884992566
112	751	4	884992754
112	891	3	892439990
113	9	3	875076307
113	245	3	875325377
113	255	5	875935609
113	258	5	875075887
113	288	3	875075887
113	289	2	875075887
113	1251	5	875325377
114	98	4	881259495
114	168	3	881259927
114	474	5	881260170
114	615	2	881260441
115	48	5	881171203
115	124	5	881170332
115	137	5	881169776
115	176	5	881171203
115	229	3	881171693
115	240	5	881171982
115	279	3	881170725
115	282	4	881171009
115	284	2	881170902
115	317	5	881171137
115	479	5	881171825
115	654	5	881171409
115	741	3	881170065
115	980	4	881169984
116	11	5	886310197
116	50	3	876452443
116	181	4	876452523
116	221	4	876453560
116	272	3	886309505
116	289	4	876452094
116	303	3	890633075
116	307	3	879864042
116	315	3	886309605
116	323	3	876452186
116	340	3	879864008
116	355	2	887605347
116	479	4	876454191
116	515	4	876452443
116	539	2	886309573
116	607	2	876453961
116	678	3	876452228
116	896	2	890632896
116	902	2	890632896
116	1020	3	887605454
116	1039	4	876453915
116	1134	4	886310197
116	1142	4	876452492
116	1255	2	876453377
117	7	3	880125780
117	96	5	881012530
117	156	4	881011376
117	265	4	881012940
117	410	3	886021458
117	596	3	880126392
117	1165	3	881010727
118	175	5	875384885
118	201	5	875385198
118	258	5	875385386
118	558	5	875385228
118	672	4	875385257
118	844	5	875385256
119	9	4	890627252
119	70	3	874781829
119	89	4	874781352
119	137	5	886176486
119	181	4	874775406
119	252	3	874780832
119	255	3	874775914
119	259	4	886175571
119	277	4	874774993
119	286	5	874774286
119	340	4	886176485
119	354	5	890626231
119	405	4	874775815
119	410	1	890627339
119	506	5	886176779
119	826	4	874775580
119	1016	5	874775262
119	1244	3	874781037
121	118	2	891390501
121	135	5	891388090
121	156	4	891388145
121	197	4	891388286
121	237	5	891388708
121	276	3	891388453
121	282	1	891389037
121	298	2	891388676
121	300	3	891387810
121	347	3	891389304
121	411	1	891390544
121	472	3	891390599
121	644	4	891388035
121	717	5	891390688
121	744	3	891388936
121	1194	4	891388210
122	83	5	879270327
122	135	4	879270327
122	190	4	879270424
122	403	4	879270805
122	469	5	879270644
122	1045	4	879270605
122	1113	5	879270677
122	1119	3	879270769
122	1168	4	879270902
122	1267	4	879270769
123	23	4	879873020
123	64	3	879872791
123	432	5	879873120
124	7	4	890287645
124	117	3	890287181
124	173	2	890287687
124	195	4	890399864
125	8	4	879454419
125	21	3	892838424
125	49	3	879455241
125	70	3	892838287
125	72	4	892838322
125	111	3	892838322
125	117	3	879454699
125	122	1	892839312
125	144	5	879454197
125	172	5	879454448
125	186	3	879454448
125	209	4	879455241
125	269	1	879454002
125	376	3	892838510
125	388	2	892839270
125	393	4	879455241
125	395	3	892838687
125	401	4	892838656
125	430	4	879454309
125	482	1	892836309
125	508	1	892838351
125	687	3	892836268
125	746	3	879455018
125	756	4	892838424
125	1270	3	892838977
126	337	5	887938392
126	350	2	887854892
126	681	5	887938392
127	228	5	884364866
127	901	5	884363990
128	66	3	879969329
128	73	3	879969032
128	88	4	879969390
128	161	5	879968896
128	174	3	879966954
128	179	3	879967767
128	220	1	879968352
128	274	4	879969084
128	367	4	879968858
128	392	3	879967102
128	393	4	879969136
128	404	3	879968308
128	405	4	879968859
128	433	4	879967225
128	451	4	879967879
128	465	4	879968008
128	490	5	879966785
128	605	3	879967804
128	684	4	879969390
128	685	3	879968774
128	715	4	879968512
128	742	3	879967197
128	869	3	879969064
128	955	5	879969064
128	1053	3	879968494
129	242	4	883243972
129	304	3	883244707
129	748	2	883245452
129	903	2	883245311
129	906	5	883245310
130	2	4	876252327
130	29	3	878537558
130	38	4	876252263
130	42	4	875801422
130	64	5	875801549
130	67	4	876252064
130	89	4	875216458
130	156	3	875801447
130	179	4	875217265
130	185	5	875217033
130	236	5	876251160
130	290	3	876250955
130	294	5	874953337
130	321	5	874953291
130	329	4	874953337
130	392	4	876252243
130	398	3	878537516
130	426	4	875801897
130	455	4	874953728
130	475	3	874953595
130	538	5	884623983
130	578	5	878537681
130	739	5	876252420
130	808	5	878537631
130	827	4	876251312
130	932	3	876251389
130	934	4	876251341
130	944	4	876252042
130	1013	4	876251287
130	1019	4	875801530
130	1088	2	876250805
130	1210	2	880396831
130	1245	3	876251312
130	1275	5	876252288
130	1276	4	876251312
130	1279	4	876251217
130	1280	4	877984734
131	9	5	883681723
131	137	1	883681466
131	269	5	883681723
131	813	3	883681466
132	50	3	891278774
132	251	4	891278996
132	285	4	891278996
132	286	3	891278680
132	521	4	891278996
132	1154	3	891278896
133	243	3	890589035
133	245	3	890588878
133	269	4	890588766
133	316	4	890588928
133	343	2	890589188
133	750	4	890588720
133	902	3	890588672
134	1	5	891732756
134	301	2	891732296
134	302	2	891732150
134	315	3	891732122
135	55	4	879857797
135	203	4	879857797
135	321	4	879857575
135	324	3	879857575
135	327	4	879857575
135	452	2	879857843
135	470	4	879857931
135	1217	2	879857956
136	9	5	882693429
136	15	4	882693723
136	124	5	882693489
136	127	5	882693404
136	269	5	882693234
137	411	5	881433490
137	866	3	881433090
137	1028	5	881433409
138	45	5	879024232
138	137	5	879023131
138	509	4	879024232
138	602	4	879024382
139	100	5	879538199
139	242	3	879537876
139	288	4	879537918
139	302	3	879537844
139	676	4	879538275
139	1233	5	879537844
140	245	3	879013720
140	304	4	879013747
140	873	2	879013719
141	15	5	884584981
141	25	5	884585105
141	100	4	884584688
141	255	4	884585039
141	257	3	884584773
141	276	1	884584817
141	291	5	884585220
141	346	1	886447613
141	597	4	884585071
141	619	4	884585039
141	676	5	884585001
141	696	4	884585498
141	717	4	884585470
141	871	3	884585148
141	930	4	884585247
141	985	4	884585363
141	1014	3	884585572
141	1047	4	884585220
142	7	4	888640489
142	186	4	888640430
142	259	3	888640104
142	294	3	888640054
142	315	3	888639837
142	425	4	888640489
143	294	3	888407708
143	315	4	888407542
143	326	5	888407708
143	1038	3	888407656
144	14	4	888104122
144	54	2	888105473
144	55	4	888105254
144	98	4	888105587
144	116	4	888104258
144	124	4	888104063
144	127	4	888105823
144	147	3	888104402
144	234	4	888105115
144	282	4	888104123
144	307	1	888103407
144	357	4	888105254
144	405	4	888104419
144	474	4	888105311
144	478	4	888105337
144	514	5	888105197
144	632	4	888105472
144	651	4	888105197
144	751	4	888103725
144	963	4	888105254
144	1010	3	888104834
144	1012	4	888104521
144	1013	1	888104446
145	31	5	875271896
145	62	2	885557699
145	66	4	875272786
145	88	5	875272833
145	111	3	875270322
145	135	5	885557731
145	164	4	875271948
145	173	5	875272604
145	176	5	875271838
145	181	5	875270507
145	219	5	877343185
145	246	4	888397946
145	284	4	888398104
145	316	5	888396966
145	329	4	888397542
145	331	3	879161554
145	343	5	882181082
145	347	3	891509921
145	352	4	885556043
145	394	1	888398833
145	447	5	877343185
145	454	1	885557699
145	597	4	875271477
145	642	3	875272010
145	678	2	879161675
145	690	4	877342952
145	728	2	875272988
145	731	3	875272833
145	826	2	875271312
145	859	3	882182763
145	890	2	885557505
145	892	2	885557505
145	894	1	883840965
145	898	1	885555980
145	930	2	888398833
145	1009	2	875270764
145	1023	1	885557545
145	1046	4	888398702
145	1051	2	888398087
145	1210	1	888398766
145	1273	5	875272196
145	1283	1	875270903
145	1289	1	875271660
146	245	5	891458080
146	272	5	891457538
146	315	5	891458193
146	336	5	891458193
146	340	4	891457714
146	345	4	891457538
146	1293	5	891458080
147	301	5	885594204
147	304	5	885593942
147	750	5	885593812
147	898	5	885593965
148	8	4	877020297
148	56	5	877398212
148	132	4	877020715
148	135	5	877016514
148	168	5	877015900
148	181	5	877399135
148	190	2	877398586
148	227	4	877399083
148	234	3	877020297
148	418	3	877019251
148	474	5	877019882
148	549	3	877398385
148	663	5	877399018
149	268	4	883512715
149	300	3	883512715
149	328	2	883512689
149	346	4	883512658
149	678	2	883512928
149	874	3	883512752
149	1295	3	883512813
149	1296	3	883512752
[truncated: 18,000 more rows]
