# Supplementary material
Source: ML conference proceedings conference paper supplement (https://proceedings.neurips.cc/paper_files/paper/2022/hash/01ecd39ca49ddecc5729ca996304781b-Abstract.html)
Supplement: Supplementary file 1 [file 01ecd39ca49ddecc5729ca996304781b-Supplemental-Conference.zip › supplementary NEURIPS 2022/CODE_supplementary/data/ml-100k/u4.test]

1	4	3	876893119
1	7	4	875071561
1	42	5	876892425
1	43	4	878542869
1	55	5	875072688
1	58	4	878542960
1	95	4	875072303
1	116	3	878542960
1	123	4	875071541
1	124	5	875071484
1	139	3	878543216
1	142	2	878543238
1	149	2	878542791
1	165	5	874965518
1	191	5	875072956
1	198	5	878542717
1	203	4	878542231
1	216	5	876892701
1	217	3	876892676
1	240	3	875071898
1	263	1	875693007
2	272	5	888979061
2	278	3	888551647
2	288	3	888550252
2	289	3	888979353
2	304	4	888979197
3	336	1	889237198
3	347	5	889237455
4	324	5	892002353
4	358	2	892004275
4	359	5	892002352
4	362	5	892002352
5	63	1	878844629
5	66	1	875721019
5	163	5	879197864
5	181	5	875635757
5	239	4	875636655
5	366	3	875637145
5	367	3	875636281
5	404	2	875721216
5	406	1	875635807
5	412	3	875635416
5	425	2	875637440
5	434	5	875637033
5	455	4	875635174
6	9	4	883599205
6	170	4	883602574
6	223	4	883600747
6	261	3	883268522
6	340	2	883268278
6	464	2	883601365
6	468	3	883602174
6	474	5	883601277
6	497	4	883601088
6	531	4	883600747
7	9	5	891351432
7	11	3	891352451
7	31	4	892134959
7	39	5	891353614
7	52	4	891353801
7	69	5	891351728
7	70	1	891352557
7	71	5	891352692
7	96	5	891351383
7	125	4	891353192
7	132	5	891351287
7	179	5	891352303
7	217	4	891352778
7	265	5	891350845
7	275	4	891352831
7	318	5	891352010
7	341	3	892333206
7	365	4	891353744
7	379	4	891353325
7	415	2	891354438
7	427	5	891352220
7	443	5	891353254
7	463	4	891353192
7	488	4	891351041
7	546	4	891353444
7	549	4	891353086
7	573	5	891353828
7	577	2	892133310
7	586	3	891354639
7	592	5	891353652
7	602	3	891352594
7	610	5	891353086
7	615	4	891351585
7	629	3	891352526
7	632	5	891352261
7	651	5	891350932
7	663	5	891352220
7	664	3	891353977
8	11	3	879362233
8	55	5	879362286
8	222	5	879362356
8	336	3	879361664
8	431	2	879362356
8	510	4	879362233
9	50	5	886960055
9	201	5	886960055
10	70	4	877891747
10	180	5	877889333
10	192	4	877891966
10	230	4	877892210
10	238	4	877892276
10	414	4	877891966
10	430	3	877886597
10	470	4	877891747
10	482	4	877889262
10	502	4	877889261
10	518	4	877886722
10	589	5	877891905
10	617	5	877892160
10	654	5	877886597
10	699	4	877893020
10	709	4	877888613
11	8	4	891904949
11	28	5	891904241
11	52	3	891904335
11	58	3	891904596
11	83	5	891904335
11	88	3	891905003
11	121	3	891902745
11	176	3	891905783
11	196	5	891904270
11	301	4	891902157
11	318	5	891904194
11	372	4	891904968
11	401	3	891905324
11	427	4	891904300
11	449	3	891906327
11	699	4	891904389
11	718	5	891903836
11	729	4	891904637
11	737	4	891904789
11	748	1	891902270
12	88	5	879960826
12	238	5	879960826
12	328	4	879958742
13	38	3	882397974
13	49	4	882399419
13	53	1	882396955
13	62	5	882397833
13	69	4	884538766
13	78	1	882399218
13	111	5	882140588
13	127	5	881515411
13	132	4	882140002
13	143	1	882140205
13	145	2	882397011
13	152	5	882141393
13	158	1	882142057
13	165	3	881515295
13	172	5	882140355
13	174	4	882139829
13	175	4	882139717
13	184	1	882397011
13	187	5	882140205
13	202	5	882141425
13	209	3	882141306
13	211	4	882140002
13	235	2	882141841
13	239	4	882141752
13	262	4	881514876
13	274	3	882399384
13	275	3	886303585
13	288	1	882396790
13	310	4	881514683
13	322	3	882140792
13	323	3	882140848
13	326	3	882140792
13	370	1	882396984
13	371	3	882399385
13	382	1	882140624
13	393	3	882141617
13	424	1	882397068
13	438	1	882397068
13	474	4	881515112
13	491	4	882140166
13	497	5	882140166
13	504	5	881515011
13	506	5	882140691
13	511	5	882139863
13	531	3	882140104
13	558	1	882397011
13	566	5	882397502
13	569	2	882396955
13	619	3	886952245
13	647	5	882140206
13	662	5	882399420
13	690	3	881514811
13	691	4	889316404
13	722	3	882399528
13	746	3	884538766
13	749	3	881515521
13	750	5	883670552
13	751	5	882774081
13	765	2	886303934
13	767	1	882397011
13	774	1	882396913
13	777	1	882397084
13	779	3	882398255
13	799	4	882139937
13	810	5	882398076
13	817	1	882396914
13	819	1	882141924
13	826	5	882398385
13	853	1	882397010
13	862	3	882399074
13	863	4	882140487
13	902	3	891749765
13	903	3	890704759
13	911	2	892015141
13	916	4	892870589
13	917	4	892015104
14	186	4	879119497
14	195	5	890881336
14	240	5	880929697
14	430	5	879119692
14	473	5	876964936
14	507	4	890881521
14	523	4	879119497
14	654	4	890881294
14	919	4	876964725
15	121	3	879456168
15	125	5	879456049
15	249	1	879455764
15	258	3	879455473
15	275	4	879455562
15	283	4	879455505
15	297	3	879455606
15	472	3	879456204
15	748	3	879455262
15	823	2	879456351
16	100	5	877720437
16	199	5	877719645
16	202	5	877724726
16	286	2	877716993
16	591	4	877726944
16	732	5	877726944
16	939	4	877717833
17	221	2	885272654
17	243	1	885166209
17	475	4	885272520
17	628	1	885272724
18	8	5	880130802
18	22	5	880130640
18	32	2	880132129
18	48	4	880130515
18	52	5	880130680
18	59	4	880132501
18	72	3	880132252
18	88	3	880130890
18	100	5	880130065
18	137	5	880132437
18	143	4	880131474
18	172	3	880130551
18	210	5	880131054
18	216	4	880129527
18	242	5	880129305
18	382	3	880129595
18	392	3	880130193
18	418	3	880130515
18	419	3	880131878
18	493	5	880132437
18	510	4	880130680
18	512	5	880131407
18	516	5	880130861
18	524	4	880129816
18	633	5	880131358
18	714	4	880130334
18	716	5	880131676
18	856	5	880131676
18	958	5	880129731
19	8	5	885412723
20	633	4	879668979
21	358	3	874951616
21	619	2	874951416
21	628	3	874951616
21	635	4	874951727
21	769	1	874951916
21	980	2	874951349
21	986	1	874951482
21	990	2	874951039
22	4	5	878886571
22	50	5	878887765
22	62	4	878887925
22	127	5	878887869
22	250	5	878888251
22	405	1	878888067
22	732	4	878886710
22	926	1	878887062
23	56	4	874785233
23	59	4	874785526
23	89	5	874785582
23	116	5	874784466
23	154	3	874785552
23	195	4	874786993
23	367	4	874785957
23	423	3	874786488
23	522	4	874785447
23	679	3	874788443
23	1004	3	874788318
24	655	5	875323915
25	1	5	885853415
25	121	4	885853030
25	133	3	885852381
25	134	4	885852008
25	173	4	885852969
25	204	5	885853415
25	408	5	885852920
25	419	4	885852218
25	527	4	885852248
26	271	3	891348070
26	284	3	891371505
26	291	3	891379753
26	293	3	891371369
26	298	3	891371505
26	369	2	891379664
26	475	3	891350826
26	751	4	891347477
26	841	2	891380200
27	288	3	891543129
27	930	2	891543222
28	5	3	881961600
28	31	4	881956082
28	96	5	881957250
28	219	5	881961728
28	229	2	881961393
28	230	4	881961393
28	448	4	881961600
28	567	4	881961782
28	672	3	881961728
29	180	4	882821989
29	303	4	882820686
29	306	4	882820730
29	312	4	882821705
29	657	4	882821942
29	1019	4	882821989
30	164	4	875060217
30	403	2	875061066
30	751	3	884310551
31	306	3	881547814
31	519	4	881548053
31	1019	5	881548082
31	1022	5	881547814
32	7	4	883717766
32	455	2	883717796
33	329	4	891964326
33	880	3	891964230
35	264	2	875459099
35	266	3	875458941
35	300	5	875458970
36	261	5	882157581
37	7	4	880915528
37	210	4	880915810
37	230	4	880915942
37	578	3	880916010
37	831	2	880915607
38	35	5	892433801
38	243	3	892429095
38	288	5	892428188
38	294	5	892428584
38	326	5	892428688
38	406	2	892434251
38	637	2	892434452
38	940	1	892434742
38	1016	5	892429542
38	1028	5	892432624
39	301	3	891400280
39	339	3	891400609
40	343	1	889041790
40	1038	1	889041741
41	56	4	890687472
41	96	4	890687019
41	152	4	890687326
41	180	5	890687019
41	194	3	890687242
42	71	4	881108229
42	73	4	881108484
42	86	3	881107880
42	97	3	881107502
42	111	1	881105931
42	132	5	881107502
42	141	3	881109059
42	174	5	881106711
42	181	5	881107291
42	559	2	881109271
42	595	1	881106582
42	655	3	881107642
42	826	3	881106419
42	941	4	881109060
42	969	5	881107687
42	1048	1	881106220
42	1050	3	881107538
43	4	4	875981421
43	70	4	883955048
43	100	4	875975656
43	102	4	875981483
43	122	2	884029709
43	124	4	891294050
43	127	4	875981304
43	144	4	883955415
43	169	5	875981128
43	208	5	883955547
43	257	4	875975276
43	274	5	883955441
43	277	1	883955498
43	421	3	883954853
43	542	3	883956518
43	546	4	875975613
43	755	3	883956075
43	845	5	883955547
44	50	5	878341246
44	87	5	878347742
44	109	3	878346431
44	133	4	878347569
44	157	4	878347711
44	172	4	878348521
44	194	5	878347504
44	328	4	878340848
44	419	4	878348784
44	427	3	878348547
44	520	5	878347874
44	523	4	878348784
44	625	3	878348691
44	756	3	878346904
45	111	4	881011550
45	181	4	881010742
45	278	3	881014550
45	284	4	881014130
45	742	4	881013176
45	845	4	881011188
45	926	3	881015386
46	93	4	883616218
46	300	3	883611307
46	332	4	883611482
46	748	5	883614645
47	286	3	879438984
47	301	4	879440333
47	303	4	879439112
47	304	3	879439144
47	307	4	879439112
48	215	4	879434751
48	243	3	879434330
48	323	3	879434181
48	1063	3	879434654
49	4	2	888069512
49	54	2	888068265
49	62	2	888069660
49	209	5	888068877
49	301	3	888065640
49	367	3	888069117
49	455	1	888068791
49	465	3	888067798
49	717	2	888068651
49	820	1	888067164
49	1017	3	888069040
49	1077	4	888068057
50	100	2	877052400
50	547	4	877052297
51	50	5	883498685
51	181	5	883498655
51	692	3	883498685
51	705	1	883498756
52	282	4	882922302
52	333	4	882922038
52	1085	4	882922454
54	240	4	880936500
54	245	4	880929738
54	250	4	880933834
54	405	4	880934806
54	634	1	892681013
54	823	2	880938088
56	50	5	892737154
56	114	4	892683248
56	161	4	892910890
56	167	3	892911494
56	225	2	892910292
56	238	5	892676885
56	280	4	892683913
56	298	4	892683695
56	410	4	892911348
56	441	4	892679163
56	559	4	892910646
56	678	4	892676056
56	930	3	892679481
57	15	4	883697223
57	50	5	883697105
57	117	4	883697512
57	194	4	883698272
57	195	3	883698431
57	323	3	883696709
57	477	4	883697655
57	845	4	883697253
57	930	2	883698039
57	988	4	883696785
57	1016	4	883697730
58	1	5	884304483
58	111	4	884304638
58	121	2	892242300
58	134	5	884304766
58	137	5	884304430
58	174	4	884305271
58	203	5	884305185
58	1008	1	884304609
58	1070	4	884304936
59	15	5	888203449
59	24	4	888203579
59	30	5	888205787
59	42	5	888204841
59	60	5	888204965
59	68	2	888205228
59	69	5	888205087
59	89	5	888204965
59	151	5	888203053
59	182	5	888204877
59	193	4	888204465
59	219	5	888206485
59	265	4	888205410
59	285	4	888202941
59	434	4	888205574
59	451	5	888206049
59	466	4	888204389
59	472	3	888203482
59	480	5	888204802
59	492	4	888205370
59	515	4	888204430
59	519	4	888204965
59	524	3	888206689
59	525	3	888204758
59	567	4	888206562
59	603	5	888204309
59	620	4	888203959
59	655	5	888204642
59	929	2	888203018
59	959	4	888206095
59	1074	4	888206409
59	1093	5	888203578
59	1112	3	888206161
60	133	4	883326893
60	134	4	883326215
60	175	5	883326919
60	237	4	883327442
60	484	5	883326370
60	496	4	883326682
60	501	3	883327472
60	517	4	883327265
60	654	4	883326399
60	1122	5	883326498
61	294	2	891220884
61	310	4	891206194
61	751	3	891206274
62	22	4	879373820
62	72	3	879375762
62	134	4	879373768
62	167	2	879376727
62	171	4	879373659
62	172	5	879373794
62	190	5	879374686
62	204	3	879373737
62	207	3	879375676
62	217	2	879376387
62	237	3	879372563
62	271	1	879371909
62	451	3	879375716
62	455	3	879372696
62	466	3	879374785
62	511	4	879373586
62	546	4	879373118
62	704	2	879375477
62	739	2	879375454
62	952	3	879372505
62	1028	1	879373215
62	1133	4	879376332
63	3	2	875748068
63	14	4	875747401
63	79	3	875748245
63	259	3	875747047
63	262	4	875746917
63	269	3	875746948
63	276	4	875747265
63	748	4	875747010
63	1138	2	875747789
64	28	4	889737851
64	48	5	879365619
64	79	4	889737943
64	87	4	889737851
64	111	4	889739975
64	132	4	889737851
64	174	5	889737478
64	234	4	889737800
64	258	3	879365313
64	275	4	879365670
64	326	3	879365313
64	463	4	889739212
64	480	3	879365619
64	591	4	889740394
64	625	3	889740286
64	655	4	889739243
64	718	4	889739243
64	1065	1	889737968
65	25	4	879217406
65	64	5	879216529
65	111	4	879217375
65	1041	3	879217942
66	282	3	883601266
66	284	3	883601812
66	535	4	883602044
67	756	3	875379566
68	9	4	876974073
68	127	4	876973969
68	181	5	876973884
68	276	5	876973884
68	713	2	876974073
69	79	4	882145524
69	172	5	882145548
69	288	5	882027173
69	334	3	882125962
70	79	4	884149453
70	91	3	884068138
70	229	3	884064269
70	257	4	884063946
70	343	4	884066910
70	451	4	884065678
70	473	3	884066399
70	559	3	884066399
70	596	3	884148728
70	655	4	884150153
70	678	3	884063627
70	684	3	884149646
70	820	1	884152379
70	1145	3	884151622
71	52	4	877319567
71	153	4	885016495
71	168	5	885016641
71	286	4	877319080
71	302	3	880864015
71	514	4	877319567
72	1	4	880035614
72	58	4	880036638
72	188	4	880037203
72	198	5	880037881
72	215	4	880036718
72	493	5	880037768
72	518	4	880036824
72	526	4	880037164
72	642	4	880037479
72	654	4	880037461
72	708	4	880036691
72	1051	4	880035958
72	1148	4	880036911
73	197	5	888625934
73	894	1	888625592
74	268	3	888333195
74	315	5	888333194
74	508	4	888333542
75	79	5	884051893
75	117	4	884050164
75	289	1	884049789
75	460	5	884050829
75	508	4	884050102
75	833	2	884051113
75	988	2	884049820
75	1048	4	884050705
75	1152	1	884050502
76	156	3	882606108
76	182	4	882606392
76	203	4	875027507
76	264	3	875027292
76	955	4	882606789
76	1154	5	878100710
77	28	5	884753061
77	121	2	884733261
77	156	4	884733621
77	173	5	884752689
77	192	3	884752900
77	199	5	884733988
77	519	5	884752874
77	527	4	884752853
78	476	3	879633767
79	1	4	891271870
79	10	5	891271901
79	222	4	891271957
79	275	4	891271627
79	276	3	891271957
79	311	4	891271278
79	515	5	891271792
80	79	4	887401407
80	483	5	887401328
81	116	3	876533504
81	456	1	876533504
81	475	5	876533504
81	928	4	876534214
82	50	5	876311146
82	87	3	878769598
82	100	5	876311299
82	112	1	877452357
82	125	3	877452380
82	170	4	878769703
82	241	3	878769992
82	338	1	884713704
82	640	3	878769292
82	770	4	878769777
82	895	1	884713704
83	79	5	887665423
83	127	4	887665549
83	240	1	883870084
83	248	3	883868788
83	591	4	880306745
83	728	4	880308909
83	751	3	883869440
83	756	4	883867791
83	1041	4	880308909
84	4	3	883453713
84	70	5	883452906
84	79	4	883453520
84	100	4	883452155
84	282	4	883450434
84	318	5	883453617
84	477	4	883452307
85	9	4	879456308
85	42	3	879453876
85	64	5	879454046
85	141	3	879829042
85	186	3	879454273
85	204	4	879828821
85	270	3	890255063
85	281	3	879452971
85	313	4	884820133
85	316	3	893110061
85	405	2	879453018
85	428	5	879454235
85	515	5	879829265
85	519	4	879829265
85	630	3	879453623
85	697	3	879829471
85	921	3	879827989
85	1018	4	882995668
85	1070	4	879453809
85	1113	2	879454981
87	49	5	879876564
87	66	5	879876403
87	94	4	879876703
87	121	5	879875893
87	174	5	879875736
87	188	4	879875818
87	222	4	879875940
87	252	3	879876224
87	433	3	879876702
87	451	4	879876448
87	476	2	879877241
87	765	3	879877006
87	801	3	879876768
87	804	3	879877083
89	15	5	879441307
89	86	5	879459859
89	301	5	879461219
90	156	4	891384147
90	171	2	891384476
90	192	4	891384959
90	198	5	891383204
90	209	5	891383173
90	212	4	891384147
90	220	4	891385165
90	223	4	891383912
90	242	4	891382267
90	268	4	891382392
90	270	4	891382310
90	275	5	891383626
90	316	5	891382658
90	479	5	891384147
90	481	5	891384516
90	505	5	891383687
90	511	5	891384476
90	644	5	891384065
90	656	5	891385132
90	750	4	891383319
90	1045	2	891385843
90	1136	3	891385899
90	1192	5	891384673
90	1201	5	891383687
90	1202	5	891385132
90	1203	5	891385466
91	69	5	891439057
91	205	5	891438947
91	343	4	891438151
91	418	2	891439503
91	511	5	891439243
91	1192	4	891439243
92	38	3	875657640
92	39	3	875656419
92	44	3	875906989
92	50	5	875640148
92	111	3	875641135
92	118	2	875640512
92	156	4	875656086
92	199	3	875811628
92	228	4	875653867
92	246	4	890251289
92	304	4	888469716
92	322	3	890251700
92	368	1	886443672
92	385	4	875653665
92	401	3	875907535
92	402	3	875813098
92	406	2	881008058
92	408	4	876175704
92	451	3	875660083
92	452	2	875906828
92	546	2	875640512
92	558	3	875906765
92	685	3	875640708
92	702	3	875656054
92	707	4	875653162
92	708	4	875654432
92	729	4	875656624
92	732	3	875812841
92	993	4	890251516
92	998	2	875907649
92	1216	4	886442386
93	276	2	888705257
94	47	5	891720498
94	51	3	891721026
94	67	3	891723296
94	91	5	891722006
94	94	2	891723883
94	172	4	885870175
94	177	5	885870284
94	195	3	885870231
94	208	4	891720643
94	238	5	891721168
94	245	1	891724828
94	357	5	891720921
94	365	3	891722383
94	372	4	891723124
94	403	3	891723188
94	411	3	891724508
94	423	4	885873302
94	465	5	891721851
94	527	5	886008885
94	568	3	891721974
94	587	4	891721078
94	627	3	891722678
94	636	4	891721351
94	637	3	891723186
94	673	3	891721615
94	746	4	891721716
94	939	4	885873423
94	1009	4	891722845
94	1045	4	891721815
94	1135	4	891722646
94	1209	2	891723459
94	1221	3	891721216
95	8	5	879198262
95	49	3	879198604
95	51	4	879198353
95	62	4	879196354
95	73	4	879198161
95	99	4	888954699
95	195	5	879196231
95	215	4	879198109
95	234	2	879197886
95	250	4	882803989
95	381	4	880571678
95	398	1	888956804
95	399	4	880572449
95	419	4	879198547
95	420	4	888956001
95	431	3	879196629
95	472	5	879197329
95	511	4	879196298
95	552	1	888956422
95	566	2	879196594
95	715	1	880572060
95	739	3	880572689
95	855	3	888954609
95	1116	4	888956137
95	1227	2	880572581
96	200	5	884403215
96	265	5	884403758
97	69	5	884239616
97	172	4	884238939
97	173	3	884238728
97	193	4	884238997
97	1126	3	884239687
98	210	4	880498968
98	211	4	880498797
98	988	1	880498668
99	116	2	888469419
99	172	5	885679952
99	276	2	885678973
99	310	3	885678348
99	326	3	885678267
99	678	2	885678479
99	1048	4	885679411
100	887	2	891374868
100	892	2	891375484
100	895	2	891375212
101	225	3	877136814
101	546	4	877137015
101	819	1	877136424
101	866	4	877137015
102	4	2	888801522
102	11	3	888801232
102	55	3	888801465
102	153	2	892991376
102	229	3	888801623
102	234	3	888802940
102	241	3	888802038
102	294	2	883277645
102	384	2	892993827
102	435	3	888801315
102	447	4	888803002
102	449	4	888802176
102	511	3	888801407
102	550	2	888801812
102	751	3	885100000
102	760	1	888803245
102	785	2	892991376
102	841	2	888802319
102	947	3	888801360
102	1052	2	892993983
103	294	4	880416515
104	222	3	888465319
104	246	3	888465319
104	268	3	888442172
104	286	1	888442304
104	340	3	888441878
105	269	4	889214193
105	343	2	889214524
106	100	3	881449487
106	162	5	881450758
107	322	1	891264535
107	325	3	891264659
107	327	3	891264501
108	1	4	879879720
108	7	5	879879812
108	281	4	879879985
109	11	4	880572786
109	25	4	880571741
109	53	4	880583336
109	63	3	880582679
109	144	4	880572560
109	151	5	880571661
109	175	1	880577734
109	209	1	880572756
109	226	5	880578503
109	228	5	880577604
109	257	5	880563331
109	282	3	880564678
109	572	3	880583308
109	810	3	880583410
109	826	3	880572064
109	1016	5	880571661
109	1245	2	880571872
110	54	4	886988202
110	63	3	886989363
110	238	3	886989340
110	338	1	886987540
110	364	3	886989612
110	722	3	886989028
110	780	3	886989566
110	939	4	886988042
110	1055	2	886988134
111	286	4	891680076
111	307	2	891680243
111	311	4	891680028
111	321	3	891680076
112	258	3	884992484
112	310	4	884992444
112	313	5	884992444
112	328	4	884992566
112	333	4	884992566
112	346	5	891307980
113	127	4	875935610
113	222	3	875076872
113	257	5	875935609
113	292	3	875076105
113	299	5	875076986
113	325	4	875935610
113	874	5	875935338
114	153	3	881309622
115	79	4	881171273
115	684	3	881171489
115	772	4	881171273
116	56	5	886310197
116	145	2	876452980
116	246	5	876452405
116	249	2	876452705
116	292	4	876453847
116	295	3	876452582
116	298	3	876452555
116	300	3	876452094
116	343	2	881246552
116	603	3	876454174
116	640	3	876453560
116	916	2	892683699
116	1220	2	876453865
116	1256	1	876453222
116	1258	2	876453376
117	11	5	881011824
117	132	4	881012110
117	184	3	881012601
117	475	5	880125746
117	931	3	881010728
118	172	5	875384751
118	188	5	875384669
118	317	5	875384885
118	508	4	875385057
119	7	5	874775185
119	28	5	874782022
119	31	5	874781779
119	64	4	874781460
119	82	2	874781352
119	121	4	874775311
119	124	4	874781994
119	125	5	874775262
119	194	5	874781257
119	204	4	886177659
119	288	4	886175150
119	298	4	874775038
119	299	4	890626446
119	316	4	890626706
119	449	5	874782190
119	458	5	874774575
119	473	3	874775647
119	475	4	874775580
119	751	3	886175361
119	827	3	874775815
119	924	4	874775535
119	1265	3	891287060
120	127	4	889489772
120	508	2	889490979
120	744	4	889490522
121	12	5	891390014
121	25	5	891390316
121	50	5	891390014
121	172	5	891388090
121	257	5	891390014
121	736	5	891387992
122	57	2	879270644
122	86	5	879270458
122	127	5	879270424
122	239	4	879270741
122	357	3	879270084
122	513	4	879270084
123	14	5	879872540
123	182	4	879872671
123	185	4	879873120
123	288	3	879809053
125	90	5	892838623
125	153	2	879454419
125	168	5	879454793
125	202	5	892836523
125	205	5	879454345
125	243	2	892836123
125	663	3	879454956
125	709	3	879454891
125	1170	1	892838591
125	1204	3	879454419
125	1271	2	892839021
126	266	5	887938392
126	316	4	887855231
126	353	5	887938392
126	678	3	887855283
126	990	4	887855231
127	50	4	884364866
127	230	5	884364866
127	258	5	884364017
127	690	1	884363851
128	69	4	879966867
128	131	5	879967452
128	186	5	879966895
128	223	5	879966839
128	229	2	879968071
128	258	2	879966299
128	319	5	879966274
128	381	3	879969033
128	416	3	879967367
128	432	2	879968125
128	458	4	879968921
128	462	4	879966729
128	468	1	879968243
128	496	5	879967225
128	501	3	879968921
128	506	4	879968125
128	531	4	879966685
128	553	3	879968718
128	633	4	879967729
128	702	3	879967879
129	300	3	883243934
129	323	1	883245452
129	990	2	883245452
129	1176	4	883244059
130	1	5	874953595
130	77	5	880396792
130	95	5	875216867
130	96	5	875216786
130	123	4	875216112
130	188	4	876251895
130	196	5	875801695
130	257	4	874953665
130	291	4	876250932
130	300	5	874953239
130	326	5	874953239
130	347	4	884623800
130	350	4	886023989
130	355	4	888211731
130	373	4	878537681
130	389	3	875216786
130	404	5	875802137
130	419	5	876251515
130	453	3	880396602
130	471	2	874953928
130	552	5	876252225
130	802	5	876252136
130	820	5	876251312
130	928	4	876251287
130	1058	5	876252064
130	1142	4	874953595
130	1157	3	880396861
130	1220	5	876252343
131	248	3	883681262
131	287	4	883681351
131	297	4	883681514
131	744	4	883681384
133	286	2	890588524
133	306	4	890588612
133	539	1	890588720
134	269	3	891732122
134	294	4	891732365
134	508	3	891732726
134	678	4	891732271
135	554	3	879858003
135	581	4	879857931
137	96	5	881433654
137	118	5	881433179
137	289	3	881432671
137	685	5	881433296
138	1	4	879023031
138	14	3	879022730
138	209	4	879023948
138	474	5	879024327
139	237	3	879538254
141	249	2	884585386
141	407	2	884585523
141	409	5	884585274
141	984	4	886447880
141	1023	4	884585274
141	1028	4	884585168
141	1280	1	887424890
141	1282	3	884585320
142	42	4	888640489
142	147	1	888640356
143	258	3	888407586
143	286	2	888407586
143	288	5	888407586
143	307	4	888407622
143	322	4	888407708
144	7	2	888104087
144	9	5	888104191
144	12	4	888105419
144	56	4	888105387
144	58	3	888105548
144	100	5	888104063
144	126	4	888104150
144	174	5	888105612
144	223	4	888105197
144	235	1	888104715
144	248	4	888104032
144	276	3	888104122
144	284	3	888104213
144	455	3	888104382
144	1028	3	888104495
145	55	3	875272009
145	98	5	875271896
145	106	4	875270655
145	118	3	875270764
145	155	2	875272871
145	222	5	885557660
145	226	1	875272196
145	227	4	885557660
145	228	4	885557660
145	240	5	875270764
145	271	4	885557660
145	308	2	885557505
145	310	4	883840666
145	358	4	875273234
145	436	5	877343121
145	449	3	885557699
145	546	3	875271047
145	590	1	882182802
145	628	2	875270932
145	636	4	875272050
145	742	4	875270616
145	821	3	875272833
145	901	1	885556116
145	925	4	875271047
145	1033	1	875270903
145	1041	5	875272987
145	1216	2	888398238
146	269	4	891457591
146	327	3	891457905
148	133	5	877019251
148	174	5	877015066
148	189	4	877019698
148	191	1	877020715
148	238	4	877398586
148	969	4	877398513
149	245	3	883512813
149	258	3	883512658
149	272	3	883512591
149	303	4	883512752
149	313	5	883512557
149	340	4	883512775
149	345	4	883512623
150	123	4	878746852
150	124	2	878746442
150	150	3	878746824
151	4	5	879524922
151	44	4	879542413
151	56	4	879524879
151	125	4	879542939
151	174	5	879524088
151	258	5	879523838
151	277	4	879524642
151	371	4	879542891
151	385	3	879542775
151	418	3	879525002
151	423	4	879528570
151	427	5	879524108
151	436	3	879524947
151	611	4	879524514
151	629	4	879528754
151	663	4	879524268
151	686	3	879525035
151	805	4	879542567
151	945	5	879524419
151	1047	2	879543036
152	33	5	882475924
152	88	5	884035964
152	283	4	880148616
152	294	4	880149098
152	367	3	882475972
152	393	5	884018430
152	596	2	880148941
152	724	5	884035936
152	763	5	884018370
153	568	4	881371140
154	185	5	879139002
154	187	5	879139096
154	200	5	879138832
154	222	2	879138910
154	496	3	879138910
155	306	5	879371121
155	326	2	879371121
156	157	4	888185906
156	480	5	888185606
156	655	3	888185677
158	22	5	880134333
158	56	5	880134296
158	107	3	880132960
158	174	5	880134332
158	208	5	880135093
158	210	4	880134296
158	217	5	880133095
158	302	4	880132193
158	385	3	880134445
158	518	4	880134398
158	648	5	880135020
158	651	5	880134296
158	686	5	880134499
158	978	3	880133937
158	1047	4	880134261
159	125	5	880557192
159	130	1	880557322
159	272	5	885501645
159	291	4	880485766
159	293	4	880485879
159	299	3	893256013
159	591	4	880557060
159	742	2	880557192
159	866	5	880557539
159	873	2	893256062
159	880	1	893256084
159	1221	5	884027141
160	11	4	876858091
160	55	4	876858091
160	129	4	876768828
160	157	5	876858346
160	213	4	876859778
160	458	5	876768025
160	955	4	876862243
161	70	3	891171064
161	194	1	891171503
161	197	3	891171734
161	929	1	891172377
162	7	3	877635869
162	55	3	877636713
162	122	2	877636300
162	179	3	877636794
162	474	3	877636556
162	826	3	877635965
163	316	5	891219976
164	9	4	889402050
164	329	4	889401410
164	407	2	889402443
164	678	4	889401432
164	825	4	889402203
164	826	4	889402340
165	127	4	879525706
165	156	3	879525894
165	174	4	879525961
165	187	3	879526046
165	326	5	879525672
165	328	3	879525673
166	315	3	886397478
166	687	1	886397777
166	688	3	886397855
167	493	4	892738307
167	554	1	892738237
167	606	4	892738452
167	1200	4	892738384
168	1	5	884287509
168	118	4	884288009
168	273	4	884287509
168	276	1	884287642
168	458	1	884288058
168	473	2	884288178
168	546	3	884287962
168	763	2	884288033
168	931	3	884288329
169	199	4	891359353
169	443	4	891359418
169	482	3	891359171
169	538	4	891268653
169	606	5	891359137
170	294	3	884705913
170	678	4	886623680
171	270	4	891034835
171	288	2	891034606
172	23	3	875537717
172	428	4	875537964
172	642	4	875538028
173	259	3	877557239
173	262	4	877556864
173	301	5	877557076
173	326	5	877556988
173	329	4	877557345
174	11	5	886439516
174	65	5	886514123
174	99	3	886515457
174	132	2	886439516
174	215	5	886514220
174	240	1	886434241
174	280	5	886433862
174	384	1	886515121
174	407	1	886515295
174	648	5	886513648
174	709	4	890168554
174	724	5	886453169
174	781	4	886513788
174	951	1	886515551
174	988	1	886515335
174	1091	3	886515591
174	1311	3	886514430
175	88	4	877108146
176	268	5	886046979
176	285	5	886047963
176	293	5	886048040
176	340	5	886046979
176	458	4	886048305
176	876	3	886047375
176	919	2	886048391
177	96	3	880130898
177	127	5	880130667
177	174	4	880130990
177	181	4	880130931
177	183	4	880130972
177	307	4	882141842
177	324	4	880130434
177	327	3	880130467
177	678	3	882142086
177	748	3	880130534
177	1110	3	880131123
178	12	5	882826162
178	31	4	882827083
178	51	4	882828021
178	100	4	882823758
178	147	4	886678902
178	161	5	882827645
178	164	3	882827288
178	194	4	882826306
178	215	5	882826807
178	222	4	882823857
178	246	4	884837324
178	283	5	882823784
178	331	4	882823301
178	410	4	882824467
178	471	4	882823930
178	511	5	882827532
178	588	4	882826242
178	628	4	882824027
178	684	5	882827019
178	781	4	882827716
178	993	5	882824592
179	353	1	892151270
179	538	4	892151231
179	682	5	892151459
179	916	5	892151064
179	1234	1	892151459
180	53	5	877442125
180	191	4	877372188
181	106	2	878963167
181	108	1	878963343
181	122	2	878963276
181	130	1	878963241
181	151	2	878962866
181	303	1	878961749
181	331	1	878961511
181	333	3	878961227
181	410	1	878962955
181	411	3	878963276
181	473	2	878962919
181	508	3	878962623
181	546	2	878962919
181	593	1	878962349
181	596	4	878962866
181	598	1	878962623
181	678	2	878961369
181	685	2	878963381
181	687	1	878961814
181	713	2	878962774
181	717	1	878963418
181	743	1	878963241
181	847	1	878962550
181	871	2	878963168
181	884	1	878961847
181	988	2	878961847
181	1008	1	878963276
181	1011	1	878963204
181	1025	1	878961668
181	1034	1	878962586
181	1061	2	878963086
181	1163	2	878963086
181	1171	1	878962773
181	1187	1	878962816
181	1296	1	878962006
181	1329	1	878962240
181	1356	1	878963204
181	1382	1	878962168
182	1	4	885613092
183	121	3	891463809
183	144	3	891479783
183	274	5	892323452
183	449	2	891463592
183	649	4	891464079
184	29	3	889910326
184	56	3	889908657
184	160	3	889911459
184	216	4	889908539
184	238	4	889909069
184	241	3	889909812
184	262	5	889906946
184	272	4	889907301
184	276	4	889907685
184	313	4	889906905
184	317	3	889909426
184	318	5	889908571
184	368	1	889908104
184	371	5	889909840
184	387	4	889909515
184	403	3	889909746
184	473	4	889908133
184	487	4	889908571
184	504	4	889908630
184	506	4	889909569
184	640	4	889909551
184	792	4	889909840
184	1101	4	889909515
184	1121	4	889910545
185	47	4	883524249
185	50	4	883525998
185	178	4	883524364
185	258	4	883526267
185	703	4	883524172
185	845	4	883524507
186	12	1	879023460
186	55	4	879023556
186	159	5	879023723
186	294	3	879024099
186	330	4	891718038
186	689	4	889817888
186	1042	5	879023632
186	1213	3	879023882
187	52	4	879465683
187	83	5	879465274
187	137	5	879464895
187	173	5	879465307
187	186	4	879465308
187	241	3	879465858
187	300	4	879464783
187	435	4	879465242
187	707	5	879465882
188	11	5	875071520
188	174	5	875072741
188	194	3	875073329
188	199	4	875071658
188	265	5	875071520
188	356	4	875074200
188	455	4	875075432
188	510	3	875071775
188	684	3	875073477
189	8	5	893265710
189	133	5	893265773
189	137	4	893264407
189	157	4	893265865
189	199	5	893265263
189	255	2	893277551
189	318	5	893265191
189	405	2	893264487
189	418	3	893266204
189	433	5	893266326
189	486	5	893266105
189	498	5	893265773
189	503	3	893266137
189	511	4	893265349
189	525	5	893265946
189	531	3	893265327
189	588	4	893266105
189	659	4	893265796
189	742	3	893264270
189	792	5	893265741
189	1020	4	893265657
189	1056	3	893265123
189	1404	5	893266325
190	7	4	891033653
190	100	4	891033653
190	258	3	891033183
190	327	2	891033349
190	328	3	891033305
191	315	5	891560253
192	100	5	881367706
192	255	2	881367505
192	269	3	881366436
192	289	4	881366615
192	1171	2	881368358
192	1265	3	881366585
193	24	2	889125880
193	79	4	889125755
193	121	3	889125913
193	182	4	890860290
193	286	4	889122906
193	715	3	890860076
193	826	2	889126146
193	1407	3	889126146
194	67	1	879549793
194	78	1	879535549
194	79	3	879521088
194	97	3	879524291
194	125	2	879548026
194	167	2	879549900
194	168	5	879521254
194	177	3	879523104
194	179	4	879521329
194	186	5	879521088
194	204	4	879522324
194	211	4	879524292
194	228	1	879535548
194	265	4	879520991
194	367	3	879525624
194	387	2	879527146
194	435	4	879520813
194	496	4	879520743
194	515	4	879524216
194	518	4	879524291
194	657	4	879521328
194	661	5	879523104
194	679	2	879523104
194	710	3	879524393
194	715	3	879527263
194	1107	3	879525624
194	1112	3	879527999
195	431	3	877835063
195	748	2	876632518
195	1315	4	878019299
196	269	3	881250949
196	845	4	881251954
196	1022	4	881251143
197	272	4	891409160
197	311	4	891409070
197	326	3	891409199
197	538	3	891409535
197	568	4	891410038
197	947	2	891410083
198	31	3	884207897
198	71	3	884208419
198	181	4	884205050
198	201	3	884207897
198	230	3	884209073
198	248	3	884205385
198	291	2	884205219
198	343	3	884204666
198	367	3	884209379
198	405	2	884206428
198	423	3	884208241
198	447	4	884209188
198	462	3	884209535
198	474	5	884207298
198	475	4	884205277
198	518	3	884208876
198	526	4	884208273
198	682	3	884204709
198	939	3	884209412
199	243	1	883782636
199	269	5	883782458
199	751	3	883782557
199	813	3	883782807
200	9	4	884126833
200	79	5	884128499
200	172	5	884128554
200	176	5	884129627
200	204	5	884128822
200	230	5	884128400
200	245	3	884126687
200	288	5	884125846
200	378	5	884129301
200	380	5	884129381
200	429	5	884130014
200	449	5	884130540
200	470	4	884129782
200	609	3	884129457
200	720	4	884130114
200	812	4	884130621
200	930	3	876042790
200	931	3	891825627
200	951	5	884130014
200	1073	3	884129542
200	1217	4	884130014
201	10	3	884114169
201	12	4	884111269
201	17	3	884112581
201	22	2	884112201
201	29	3	884141053
201	48	3	884111485
201	55	4	884114471
201	58	4	884140488
201	116	1	884112800
201	134	4	884113772
201	157	4	884113453
201	182	4	884111485
201	201	4	884112537
201	211	3	884112840
201	232	2	884112282
201	268	4	884110637
201	358	1	884111095
201	366	2	884141015
201	441	1	884112537
201	468	4	884140927
201	479	4	884111397
201	506	4	884114471
201	549	3	884140750
201	566	3	884112352
201	590	1	884114813
201	603	4	884113924
201	640	4	884112029
201	656	4	884111775
201	692	3	884114895
201	702	1	884111986
201	733	3	884140522
201	770	3	884112426
201	792	4	884140579
201	895	3	884110702
201	924	3	884140751
201	1056	2	884113592
201	1174	5	884140670
201	1267	3	884141053
201	1398	4	884140079
201	1426	2	884114015
203	237	3	880434411
203	477	4	880434755
203	879	4	880433474
203	890	2	880433499
204	880	2	892388976
205	748	4	888284710
206	242	3	888180049
206	332	3	888179602
206	682	3	888179694
206	1175	1	888180049
206	1429	1	888180018
207	3	2	877846284
207	11	3	878104245
207	64	5	877846793
207	73	3	876079087
207	158	3	878191798
207	195	3	875509307
207	208	4	878191679
207	211	5	878191679
207	316	5	891759050
207	385	3	875509346
207	393	4	877838977
207	428	4	877838826
207	515	5	878191679
207	517	3	882081278
207	538	2	880853139
207	597	3	876018471
207	685	3	876018471
207	692	3	877750738
207	763	3	877743609
207	847	3	885139179
207	871	5	880839802
209	9	3	883417547
209	249	2	883417640
209	1086	4	883417667
210	1	5	887731052
210	79	4	887736352
210	98	5	887736429
210	121	4	887737244
210	163	3	887730407
210	168	5	887730342
210	174	5	887736045
210	205	4	887736393
210	222	4	887737603
210	302	5	890059415
210	402	5	887737171
210	654	5	887737559
210	655	5	887730496
210	832	3	887730264
210	969	4	887730221
210	1028	3	887730931
210	1118	4	887730496
211	443	1	879460096
211	528	4	879459803
211	596	3	879460294
211	1330	3	879460096
212	87	5	879304010
212	317	5	879303638
212	863	2	879303863
213	7	4	878870518
213	55	5	878955680
213	64	5	878955680
213	117	4	878870987
213	154	5	878956101
213	197	5	878955707
213	627	4	878955680
213	831	4	878871062
214	98	4	892668249
214	114	4	891544290
214	188	5	892668173
214	253	5	892668173
214	276	3	891543271
214	357	5	892668130
214	482	4	891544114
214	960	2	891544152
215	54	4	891436607
215	87	5	891436543
215	132	5	891435548
215	159	3	891436707
215	172	4	891435394
215	181	4	891435597
215	204	3	891436129
215	208	4	891436202
215	226	4	891436633
215	272	3	891434619
215	552	3	891436730
216	1	4	880232615
216	27	3	881428365
216	81	4	880233726
216	91	4	880235546
216	210	4	880235229
216	276	4	880232830
216	315	5	883981859
216	416	3	880245165
216	496	5	880233635
216	508	4	881432564
216	546	2	880233197
216	747	4	880245260
217	17	3	889069903
217	761	4	889070232
218	23	4	881288298
218	153	4	877488692
218	204	3	877488692
218	514	4	877488316
218	603	4	881288234
218	663	3	877488492
219	906	4	892039575
221	12	5	875245283
221	56	5	875245592
221	150	5	875244557
221	246	5	875244457
221	578	4	875247023
221	847	4	875244051
221	1098	4	875245283
222	17	2	878183079
222	35	1	878184007
222	38	2	878185102
222	48	5	878181592
222	50	4	877563194
222	54	4	878183111
222	67	4	878183616
222	72	4	878183311
222	90	2	878181647
222	91	2	878183777
222	99	3	878182059
222	100	5	877563052
222	101	4	878183539
222	117	5	877563227
222	147	4	877563694
222	150	3	878181869
222	167	3	878183588
222	174	5	878181934
222	188	3	878184393
222	193	4	878182005
222	198	4	881059039
222	246	4	877563597
222	249	1	883815768
222	255	3	883815804
222	258	5	877562748
222	265	3	878182279
222	356	4	878184571
222	358	2	877562839
222	412	1	877564050
222	423	4	878183657
222	446	3	881060824
222	455	3	877563437
222	457	1	878181287
222	470	3	878181869
222	537	4	881060735
222	541	2	878184973
222	542	2	878183837
222	575	3	881060550
222	588	4	881059537
222	596	3	877563739
222	637	2	878183713
222	654	3	878184087
222	692	4	878182370
222	717	1	877563716
222	734	2	881060735
222	738	3	878182959
222	770	3	878181592
222	1079	1	878183984
222	1220	4	878184290
222	1439	3	878183951
223	71	5	891550649
223	155	5	891550952
223	259	3	891548920
223	288	3	891548562
223	289	1	891549017
223	313	5	891548750
223	329	2	891549079
223	405	1	891550005
223	873	3	891549111
223	1052	1	891550404
223	1284	1	891550295
224	125	3	888103942
224	222	4	888103729
224	468	4	888104030
224	553	4	888104393
224	555	3	888104030
224	591	3	888082584
224	980	1	888104353
224	991	1	888082277
225	482	5	879540707
226	286	4	883888600
226	370	3	883890235
226	513	3	883889256
227	100	5	879035251
227	741	3	879035464
227	823	2	879035599
227	1068	4	879035289
228	286	5	889387172
228	812	5	889388547
229	303	1	891632073
229	316	1	891632347
229	886	1	891632164
229	898	5	891633028
230	22	5	880484850
230	56	3	880484416
230	117	5	880484320
230	161	5	880485468
230	162	4	880484587
230	174	5	880484661
230	233	1	880485513
230	431	3	880485254
231	300	4	888605273
231	313	3	888604920
231	866	3	879965961
232	4	4	888550130
232	50	4	880062302
232	178	5	888549988
232	294	2	880062259
232	508	1	880062447
232	589	3	888549790
232	690	4	880062259
232	900	5	888364663
233	70	5	879147810
233	89	3	875508225
233	127	5	877661364
233	168	5	877663302
233	435	5	877665324
233	523	4	877663913
233	528	5	877665324
233	614	4	877661437
233	647	5	877661364
234	31	4	892334803
234	52	4	892334141
234	82	3	892334079
234	89	3	892079910
234	106	4	892336322
234	119	3	892335261
234	148	3	891228196
234	164	3	892334644
234	204	2	892079617
234	207	2	892078605
234	238	3	892079040
234	243	1	891034107
234	367	4	892334976
234	464	4	892079288
234	465	2	892334803
234	466	4	892334368
234	495	4	892335042
234	513	5	892333980
234	527	3	892334189
234	557	1	892335989
234	611	5	892078605
234	622	2	892335415
234	629	4	892335042
234	641	4	892078297
234	647	3	892826411
234	661	5	892333573
234	663	4	892335707
234	686	3	892334976
234	694	3	892079040
234	702	2	892335707
234	724	4	892335739
234	749	3	891033772
234	832	2	892335501
234	837	3	892079434
234	925	2	892334976
234	939	2	892333798
234	964	4	892334852
234	989	2	891033966
234	1011	3	891227730
234	1075	3	892335797
234	1101	3	892335372
235	66	2	889655266
235	82	2	889655403
235	170	4	889656113
235	344	5	889654419
235	429	4	889655662
235	463	4	889656008
235	524	5	889655204
235	1105	2	889654460
236	28	4	890116539
236	88	2	890116709
236	135	2	890116033
236	179	1	890118417
236	199	4	890118307
236	273	1	890116670
236	294	2	890116895
236	370	3	890117353
236	510	3	890118543
236	526	3	890116500
237	174	4	879376773
237	483	5	879376381
238	257	4	883576261
238	1258	1	883576666
239	12	5	889178729
239	116	5	889181093
239	133	3	889178652
239	208	3	889181015
239	209	5	889179032
239	238	5	889180747
239	276	5	889179506
239	304	1	889181248
239	463	5	889178689
239	483	5	889179253
239	505	5	889180169
239	507	5	889180651
239	531	5	889178762
239	633	5	889180040
239	1115	2	889180651
240	242	5	885775683
240	307	4	885775683
240	340	4	885775710
240	349	1	885775878
240	358	2	885775857
240	748	3	885775831
240	895	5	885775711
242	294	4	879740082
243	10	4	879987526
243	26	3	879988459
243	111	4	879987793
243	157	5	879989217
243	237	2	879987148
243	283	3	879987362
243	285	5	879989217
243	367	3	879988976
[truncated: 18,000 more rows]
