# Supplementary material
Source: ML conference proceedings conference paper supplement (https://proceedings.neurips.cc/paper_files/paper/2022/hash/01ecd39ca49ddecc5729ca996304781b-Abstract.html)
Supplement: Supplementary file 1 [file 01ecd39ca49ddecc5729ca996304781b-Supplemental-Conference.zip › supplementary NEURIPS 2022/CODE_supplementary/data/ml-100k/u5.base]

1	1	5	874965758
1	2	3	876893171
1	4	3	876893119
1	5	3	889751712
1	6	5	887431973
1	7	4	875071561
1	8	1	875072484
1	9	5	878543541
1	10	3	875693118
1	11	2	875072262
1	12	5	878542960
1	14	5	874965706
1	16	5	878543541
1	17	3	875073198
1	20	4	887431883
1	21	1	878542772
1	22	4	875072404
1	23	4	875072895
1	24	3	875071713
1	25	4	875071805
1	26	3	875072442
1	27	2	876892946
1	30	3	878542515
1	31	3	875072144
1	32	5	888732909
1	33	4	878542699
1	34	2	878542869
1	35	1	878542420
1	36	2	875073180
1	37	2	878543030
1	38	3	878543075
1	39	4	875072173
1	40	3	876893230
1	41	2	876892818
1	42	5	876892425
1	43	4	878542869
1	44	5	878543541
1	45	5	875241687
1	46	4	876893230
1	47	4	875072125
1	48	5	875072520
1	49	3	878542478
1	50	5	874965954
1	51	4	878543275
1	53	3	876893206
1	54	3	878543308
1	55	5	875072688
1	56	4	875072716
1	57	5	878542459
1	58	4	878542960
1	60	5	875072370
1	61	4	878542420
1	62	3	878542282
1	63	2	878543196
1	64	5	875072404
1	65	4	875072125
1	66	4	878543030
1	67	3	876893054
1	68	4	875072688
1	69	3	875072262
1	70	3	875072895
1	71	3	876892425
1	72	4	878542678
1	73	3	876892774
1	74	1	889751736
1	75	4	878543238
1	76	4	878543176
1	77	4	876893205
1	78	1	878543176
1	79	4	875072865
1	80	4	876893008
1	81	5	875072865
1	82	5	878542589
1	84	4	875072923
1	85	3	875073180
1	86	5	878543541
1	87	5	878543541
1	89	5	875072484
1	90	4	878542300
1	91	5	876892636
1	92	3	876892425
1	93	5	875071484
1	95	4	875072303
1	96	5	875072716
1	97	3	875073128
1	98	4	875072404
1	99	3	875072547
1	100	5	878543541
1	101	2	878542845
1	102	2	889751736
1	103	1	878542845
1	104	1	875241619
1	105	2	875240739
1	106	4	875241390
1	107	4	875241619
1	108	5	875240920
1	109	5	874965739
1	110	1	878542845
1	112	1	878542441
1	113	5	878542738
1	114	5	875072173
1	115	5	878541637
1	116	3	878542960
1	117	3	874965739
1	118	3	875071927
1	119	5	876893098
1	120	1	875241637
1	121	4	875071823
1	123	4	875071541
1	124	5	875071484
1	125	3	878542960
1	127	5	874965706
1	128	4	875072573
1	129	5	887431908
1	130	3	875072002
1	131	1	878542552
1	132	4	878542889
1	133	4	876892818
1	134	4	875073067
1	135	4	875072404
1	136	3	876893206
1	137	5	875071541
1	138	1	878543006
1	139	3	878543216
1	140	1	878543133
1	141	3	878542608
1	142	2	878543238
1	143	1	875072631
1	144	4	875073180
1	145	2	875073067
1	146	4	875071561
1	147	3	875240993
1	148	2	875240799
1	149	2	878542791
1	150	5	876892196
1	151	4	875072865
1	153	3	876893230
1	154	5	878543541
1	155	2	878542201
1	156	4	874965556
1	157	4	876892918
1	158	3	878542699
1	159	3	875073180
1	160	4	875072547
1	161	4	875072303
1	162	4	878542420
1	163	4	875072442
1	164	3	876893171
1	165	5	874965518
1	166	5	874965677
1	167	2	878542383
1	168	5	874965478
1	169	5	878543541
1	170	5	876892856
1	171	5	889751711
1	173	5	878541803
1	174	5	875073198
1	175	5	875072547
1	176	5	876892468
1	177	5	876892701
1	178	5	878543541
1	179	3	875072370
1	180	3	875072573
1	181	5	874965739
1	182	4	875072520
1	183	5	875072262
1	184	4	875072956
1	185	4	875072631
1	186	4	875073128
1	187	4	874965678
1	188	3	875073128
1	189	3	888732928
1	190	5	875072125
1	191	5	875072956
1	192	4	875072547
1	193	4	876892654
1	194	4	876892743
1	195	5	876892855
1	196	5	874965677
1	197	5	875072956
1	198	5	878542717
1	199	4	875072262
1	200	3	876893098
1	201	3	878542960
1	202	5	875072442
1	203	4	878542231
1	205	3	878542909
1	206	4	876893205
1	208	5	878542960
1	209	4	888732908
1	210	4	878542909
1	211	3	878541970
1	212	4	875072895
1	213	2	876892896
1	214	4	875072520
1	215	3	876893145
1	216	5	876892701
1	217	3	876892676
1	218	3	876892856
1	219	1	878542327
1	220	3	875241390
1	221	5	887431921
1	222	4	878873388
1	223	5	876892918
1	224	5	875071484
1	225	2	878542738
1	226	3	878543176
1	227	4	876892946
1	228	5	878543541
1	229	4	878542075
1	230	4	878542420
1	232	3	878543196
1	233	2	878542552
1	234	4	876892355
1	235	5	875071589
1	236	4	875071898
1	237	2	875071749
1	238	4	875072235
1	239	4	878542845
1	240	3	875071898
1	241	4	878543133
1	242	5	889751633
1	243	1	875241390
1	245	2	875071713
1	246	5	874965905
1	247	1	875241619
1	248	4	874965954
1	249	4	874965970
1	250	4	874965706
1	251	4	875071843
1	252	2	875240677
1	253	5	874965970
1	254	1	878541392
1	255	2	885345822
1	256	4	889751712
1	257	4	874965954
1	258	5	878873389
1	259	1	875692979
1	260	1	875071713
1	261	1	875692992
1	262	3	875071421
1	263	1	875693007
1	264	2	875071713
1	265	4	878542441
1	266	1	885345728
1	267	4	875692955
1	268	5	875692927
1	269	5	877482427
1	270	5	888732827
1	271	2	887431672
1	272	3	887431647
2	1	4	888550871
2	10	2	888551853
2	13	4	888551922
2	14	4	888551853
2	19	3	888550871
2	25	4	888551648
2	50	5	888552084
2	100	5	888552084
2	111	4	888551853
2	127	5	888552084
2	237	4	888552017
2	242	5	888552084
2	251	5	888552084
2	255	4	888551341
2	257	4	888551062
2	258	3	888549961
2	269	4	888550774
2	272	5	888979061
2	273	4	888551647
2	274	3	888551497
2	276	4	888551552
2	277	4	888551174
2	278	3	888551647
2	279	4	888551745
2	280	3	888551441
2	281	3	888980240
2	282	4	888551922
2	283	5	888552084
2	284	4	888552017
2	285	5	888552084
2	287	3	888551235
2	288	3	888550252
2	289	3	888979353
2	290	3	888551441
2	291	3	888551647
2	292	4	888550774
2	293	4	888550939
2	294	1	888551648
2	295	4	888551164
2	297	4	888550871
2	298	3	888551441
2	299	4	888550774
2	300	4	888979197
2	301	4	888550631
2	303	4	888550774
2	304	4	888979197
2	305	3	888550065
2	306	4	888550774
2	307	3	888550066
2	308	3	888979945
2	309	1	888980029
2	310	4	888979061
2	311	5	888552084
2	312	3	888550631
2	313	5	888552084
2	314	1	888980085
2	315	1	888550774
2	316	5	888979693
3	181	4	889237482
3	245	1	889237247
3	258	2	889237026
3	260	4	889237455
3	264	2	889237297
3	268	3	889236961
3	271	3	889237224
3	272	2	889237055
3	288	2	889237026
3	294	2	889237224
3	299	3	889237199
3	300	2	889236939
3	302	2	889236939
3	303	3	889236983
3	307	3	889237224
3	317	2	889237482
3	318	4	889237482
3	319	2	889237026
3	320	5	889237482
3	321	5	889237455
3	322	3	889237269
3	323	2	889237269
3	324	2	889237247
3	325	1	889237297
3	326	2	889237224
3	327	4	889237455
3	328	5	889237455
3	329	4	889237455
3	330	2	889237297
3	331	4	889237455
3	332	1	889237224
3	333	2	889236939
3	334	3	889237122
3	335	1	889237269
3	336	1	889237198
3	337	1	889236983
3	338	2	889237297
3	339	3	889237141
3	341	1	889237055
3	342	4	889237174
3	343	3	889237122
3	344	4	889236939
3	345	3	889237004
3	347	5	889237455
3	348	4	889237455
3	349	3	889237269
3	350	3	889237076
3	351	3	889237315
3	352	2	889237055
3	354	3	889237004
3	355	3	889237247
4	11	4	892004520
4	50	5	892003526
4	210	3	892003374
4	258	5	892001374
4	260	4	892004275
4	264	3	892004275
4	271	4	892001690
4	288	4	892001445
4	294	5	892004409
4	300	5	892001445
4	303	5	892002352
4	324	5	892002353
4	327	5	892002352
4	328	3	892001537
4	329	5	892002352
4	354	5	892002353
4	356	3	892003459
4	357	4	892003525
4	358	2	892004275
4	359	5	892002352
4	361	5	892002353
4	362	5	892002352
5	1	4	875635748
5	2	3	875636053
5	17	4	875636198
5	21	3	875635327
5	24	4	879198229
5	25	3	875635318
5	29	4	875637023
5	40	4	879198109
5	42	5	875636360
5	50	4	875635758
5	62	4	875637575
5	63	1	878844629
5	66	1	875721019
5	69	1	875721555
5	70	4	875636389
5	79	3	875635895
5	80	2	875636511
5	89	5	875636033
5	90	3	875636297
5	94	3	878844651
5	95	4	875721168
5	98	3	875720691
5	99	3	875721216
5	100	5	875635349
5	101	5	878844510
5	102	3	875721196
5	109	5	875635350
5	110	1	875636493
5	121	4	875635189
5	135	4	875637536
5	139	3	875721260
5	143	3	875636815
5	144	3	875636141
5	145	1	875720830
5	151	3	875635723
5	153	5	875636375
5	154	3	875636691
5	162	1	875721572
5	163	5	879197864
5	167	2	875636281
5	168	3	875636691
5	169	5	878844495
5	172	5	875636130
5	173	4	875636675
5	176	3	875635962
5	181	5	875635757
5	183	4	875636014
5	185	3	875720692
5	186	5	875636375
5	189	5	878844495
5	194	4	878845197
5	204	4	875636675
5	208	4	875636675
5	209	5	875636571
5	211	4	875636631
5	214	3	875637485
5	216	1	875720967
5	219	3	875720744
5	222	4	875635174
5	225	2	875635723
5	226	3	875635962
5	227	4	875636099
5	228	5	875636070
5	229	2	875635947
5	230	3	875636070
5	231	2	875635947
5	234	2	875720692
5	235	4	875635384
5	239	4	875636655
5	241	1	875720948
5	243	1	878844164
5	250	3	875635265
5	257	5	875635239
5	259	1	878844208
5	267	4	875635064
5	363	3	875635225
5	364	1	875636571
5	365	1	875637144
5	366	3	875637145
5	367	3	875636281
5	369	1	875635372
5	370	1	875720814
5	371	1	875720967
5	372	3	875636230
5	374	3	875636905
5	376	2	879198045
5	377	1	878844615
5	378	1	875721167
5	379	3	875720814
5	381	1	875636540
5	382	5	875636587
5	384	3	875636389
5	385	4	875636185
5	386	2	875636230
5	387	3	875637419
5	388	2	879198898
5	389	1	875721315
5	390	5	875636340
5	391	4	875636167
5	392	2	875637330
5	393	2	875636265
5	394	2	879198031
5	395	2	879198898
5	396	5	875636265
5	397	2	875635907
5	398	2	875636167
5	399	3	875635947
5	400	1	878844630
5	401	5	875636308
5	402	1	875720947
5	403	3	875636152
5	404	2	875721216
5	405	3	875635225
5	406	1	875635807
5	407	3	875635431
5	408	5	878844495
5	409	2	878844651
5	410	1	879198183
5	411	1	875635431
5	412	3	875635416
5	413	3	875635807
5	414	3	875636691
5	415	1	875636842
5	416	1	875721196
5	417	3	875636830
5	418	3	875721216
5	420	3	875721168
5	421	1	875721019
5	422	4	875636767
5	423	4	875636793
5	424	1	875635807
5	425	2	875637440
5	426	3	878844510
5	427	3	875721167
5	428	5	875636588
5	429	3	875637429
5	430	5	875636631
5	431	3	875636099
5	432	4	875636793
5	433	5	875636655
5	434	5	875637033
5	435	4	875636033
5	436	5	875720717
5	437	1	878844423
5	438	1	878844423
5	439	1	878844423
5	440	1	878844423
5	441	1	875720830
5	442	1	879198898
5	443	4	875720744
5	444	2	875720762
5	445	3	875720744
5	446	4	875720845
5	447	3	875720744
5	449	2	875636099
5	450	1	875635962
5	451	1	875636571
5	452	1	878844397
5	453	1	879198898
5	454	1	875721432
5	455	4	875635174
5	456	1	875636375
5	457	1	879198898
6	1	4	883599478
6	7	2	883599102
6	9	4	883599205
6	12	4	883601053
6	13	2	883599400
6	14	5	883599249
6	15	3	883599302
6	19	4	883602965
6	21	3	883600152
6	22	3	883602048
6	23	4	883601365
6	28	2	883603013
6	32	4	883601311
6	47	3	883600943
6	50	4	883600842
6	56	4	883601277
6	59	5	883601713
6	64	4	883600597
6	69	3	883601277
6	70	3	883601427
6	71	4	883601053
6	79	3	883600747
6	81	4	883602283
6	86	3	883603013
6	87	4	883602174
6	89	4	883600842
6	95	2	883602133
6	98	5	883600680
6	100	5	883599176
6	117	2	883599431
6	124	5	883599228
6	125	3	883599670
6	127	5	883599134
6	131	5	883602048
6	132	5	883602422
6	133	4	883601459
6	134	5	883602283
6	135	5	883600747
6	136	5	883600842
6	137	5	883599327
6	143	2	883601053
6	151	3	883599558
6	153	4	883603013
6	154	3	883602730
6	156	3	883602212
6	165	5	883600747
6	166	4	883601426
6	168	4	883602865
6	169	4	883600943
6	170	4	883602574
6	173	5	883602462
6	174	4	883600985
6	175	4	883601426
6	177	4	883600818
6	178	4	883600785
6	180	4	883601311
6	183	4	883601311
6	185	5	883601393
6	186	4	883602730
6	187	4	883600914
6	188	3	883602462
6	189	3	883601365
6	191	4	883601088
6	192	4	883600914
6	193	3	883601529
6	194	4	883601365
6	195	4	883602283
6	197	5	883601203
6	199	4	883601203
6	200	3	883602422
6	203	3	883602864
6	204	3	883601277
6	205	3	883600878
6	208	4	883602422
6	209	4	883601713
6	211	5	883601155
6	213	4	883602462
6	221	4	883599431
6	223	4	883600747
6	238	5	883601713
6	242	4	883268170
6	246	3	883599509
6	248	3	883598981
6	257	2	883599478
6	258	2	883268278
6	259	1	883268375
6	261	3	883268522
6	268	3	883268406
6	269	4	883268222
6	272	4	883717304
6	274	4	883602501
6	275	4	883599102
6	276	2	883599134
6	284	2	883599590
6	286	2	883268170
6	293	3	883599327
6	294	2	883599938
6	297	3	883599134
6	298	3	883599558
6	301	2	883600406
6	302	4	883268222
6	303	3	883268321
6	304	4	883268322
6	308	3	883600445
6	309	2	883268430
6	310	2	883268353
6	317	3	883602174
6	318	4	883600985
6	321	3	883268353
6	340	2	883268278
6	357	4	883602422
6	367	2	883602690
6	405	1	883600066
6	408	4	883599075
6	410	4	883599707
6	419	4	883602284
6	423	3	883602501
6	425	3	883602865
6	427	4	883600707
6	432	4	883601713
6	435	4	883601529
6	458	1	883599914
6	459	2	883599228
6	460	2	883600004
6	461	4	883601393
6	462	5	883600914
6	463	4	883601713
6	464	2	883601365
6	465	1	883683508
6	466	4	883602422
6	467	4	883602284
6	468	3	883602174
6	469	5	883601155
6	470	3	883602690
6	471	2	883599558
6	472	1	883600003
6	473	2	883600111
6	474	5	883601277
6	475	5	883599478
6	476	1	883600175
6	477	1	883599509
6	478	4	883602762
6	479	5	883601053
6	480	4	883601089
6	481	5	883600914
6	482	4	883601203
6	483	5	883601500
6	484	5	883601011
6	485	5	883602664
6	486	4	883601427
6	487	5	883600785
6	488	5	883601426
6	489	5	883601011
6	491	4	883602174
6	492	5	883601089
6	493	5	883601713
6	494	4	883601713
6	495	4	883601366
6	497	4	883601088
6	498	4	883601053
6	499	4	883602283
6	500	4	883601277
6	501	5	883602730
6	502	4	883602664
6	503	3	883602133
6	504	3	883601155
6	505	4	883602422
6	506	4	883602174
6	507	4	883601310
6	508	3	883599530
6	509	4	883602664
6	510	4	883600785
6	511	5	883601393
6	512	4	883601155
6	513	4	883600913
6	514	5	883600657
6	515	4	883599273
6	516	4	883602664
6	517	4	883602212
6	518	3	883603042
6	519	5	883601365
6	520	4	883600985
6	521	4	883601277
6	522	5	883601500
6	523	5	883601528
6	524	3	883600632
6	525	5	883601203
6	526	3	883602596
6	527	4	883600877
6	528	4	883602174
6	529	4	883601459
6	530	4	883601203
6	531	4	883600747
6	532	3	883600066
6	534	4	883599354
6	535	2	883600030
6	536	4	883599400
6	538	2	883268483
7	4	5	891351772
7	7	5	891352220
7	8	5	891351328
7	9	5	891351432
7	10	4	891352864
7	11	3	891352451
7	22	5	891351121
7	23	3	891351383
7	25	3	891352451
7	27	4	891352692
7	28	5	891352341
7	29	3	891353828
7	31	4	892134959
7	32	4	891350932
7	39	5	891353614
7	44	5	891351728
7	47	5	891352692
7	51	2	891352984
7	52	4	891353801
7	53	5	891354689
7	54	3	892132380
7	56	5	891351432
7	62	3	891354499
7	64	5	891350756
7	68	4	891351547
7	69	5	891351728
7	70	1	891352557
7	71	5	891352692
7	72	5	891353977
7	73	3	892133154
7	77	5	891353325
7	78	3	891354165
7	79	4	891352261
7	80	4	891354381
7	81	5	891352626
7	82	3	891351471
7	89	5	891351082
7	90	3	891352984
7	91	3	891353860
7	92	5	891352010
7	93	5	891351042
7	96	5	891351383
7	97	5	891351201
7	98	4	891351002
7	99	5	891352557
7	100	5	891351082
7	101	5	891350966
7	106	4	891353892
7	118	2	891353411
7	121	5	891352904
7	125	4	891353192
7	126	3	891353254
7	127	5	891351728
7	131	5	891352383
7	132	5	891351287
7	133	5	891353192
7	134	4	892134959
7	135	5	891351547
7	136	5	891351813
7	139	3	891354729
7	140	5	891353124
7	141	5	891353444
7	142	3	891354090
7	143	3	892132627
7	145	1	891354530
7	151	4	891352749
7	153	5	891352220
7	154	5	891353124
7	156	5	891351653
7	157	5	891352059
7	161	3	891352489
7	162	5	891353444
7	163	4	891353444
7	166	3	891351585
7	168	5	891351509
7	171	3	891351287
7	172	4	891350965
7	174	5	891350757
7	175	5	892133057
7	176	3	891350782
7	177	4	891352904
7	178	4	891350932
7	179	5	891352303
7	180	5	891350782
7	181	3	891351287
7	182	4	891350965
7	183	4	891351624
7	185	5	892135346
7	186	4	891350900
7	187	4	891350757
7	188	5	891352778
7	190	5	891351728
7	191	5	891351201
7	192	4	891352010
7	193	5	892135346
7	194	5	891351851
7	195	5	891352626
7	196	5	891351432
7	199	5	892135346
7	200	5	891353543
7	201	2	891351471
7	202	3	891352947
7	203	5	891352178
7	204	5	891351121
7	205	5	891351585
7	207	4	891352526
7	208	5	891352220
7	210	4	891352904
7	212	1	891353051
7	213	3	891351686
7	214	5	891352384
7	215	4	891351624
7	216	4	891350900
7	217	4	891352778
7	219	1	892131924
7	223	5	891351328
7	226	5	891353614
7	227	3	892132317
7	228	4	891350845
7	229	3	891352384
7	230	3	891353326
7	231	3	892132885
7	232	3	891353766
7	234	5	891351041
7	237	5	891351772
7	238	5	891351814
7	241	4	891354053
7	258	4	892135277
7	259	3	891350464
7	260	1	892130982
7	264	4	891350703
7	265	5	891350845
7	266	4	891350703
7	268	3	891350703
7	269	3	891349991
7	273	3	891351547
7	275	4	891352831
7	281	3	891353710
7	285	5	891351813
7	286	4	891350703
7	288	4	891350703
7	294	1	892130809
7	300	4	891350703
7	307	5	891350703
7	318	5	891352010
7	324	1	892135078
7	334	5	892130784
7	341	3	892333206
7	356	4	891351728
7	365	4	891353744
7	378	5	891353011
7	379	4	891353325
7	380	4	891354053
7	382	4	891352093
7	384	3	891353710
7	385	5	891351585
7	386	4	892133310
7	387	3	892133670
7	389	4	891354090
7	391	3	892132943
7	393	4	891352058
7	396	4	891354288
7	399	4	891354357
7	401	4	891354257
7	402	5	891352904
7	403	4	891351234
7	404	5	891352947
7	405	3	891353290
7	415	2	891354438
7	416	5	891353051
7	417	3	892132652
7	418	4	892131824
7	419	3	891350900
7	420	5	891353219
7	423	5	891351509
7	427	5	891352220
7	428	5	892133036
7	429	5	891351002
7	430	3	891352178
7	431	4	891351547
7	432	4	891352831
7	433	5	892135347
7	434	4	891352384
7	435	5	891350845
7	436	5	891351471
7	440	1	892131978
7	443	5	891353254
7	444	5	891354288
7	446	2	892132020
7	447	5	891350900
7	448	3	891353828
7	449	3	891354785
7	450	4	892132425
7	451	5	891353892
7	452	5	891353860
7	455	4	891353086
7	461	4	891352303
7	463	4	891353192
7	465	4	891353154
7	470	3	891352489
7	471	4	891352864
7	472	2	891353357
7	474	5	891351002
7	479	4	891352010
7	480	4	891352093
7	481	5	891352341
7	482	3	891351083
7	483	4	891351851
7	484	5	891351201
7	485	5	891351851
7	487	3	891352178
7	488	4	891351041
7	489	3	891353477
7	491	5	891351432
7	492	5	891352010
7	495	5	891351328
7	496	5	891351083
7	497	4	891352134
7	498	5	891351814
7	499	4	891351472
7	501	5	891353411
7	502	5	891352261
7	503	4	891353950
7	504	5	891352384
7	505	3	891352341
7	506	5	891353614
7	507	5	891352383
7	510	5	891352134
7	511	5	891351624
7	513	4	891351772
7	514	2	891351121
7	515	3	891350757
7	519	4	891352831
7	520	5	892133466
7	523	4	891350845
7	526	5	891351042
7	527	5	891351772
7	528	5	891352659
7	529	2	891352626
7	530	5	891350900
7	537	3	891352749
7	540	3	892132972
7	541	2	891354662
7	542	4	892131849
7	543	3	891351772
7	544	3	891353254
7	545	2	891354882
7	546	4	891353444
7	547	3	891353710
7	548	5	891352692
7	549	4	891353086
7	550	4	891352489
7	551	1	892131978
7	552	4	891354531
7	553	3	892134010
7	554	3	891354639
7	555	4	892134811
7	556	3	891352659
7	557	4	892132145
7	558	4	892131924
7	559	5	891354882
7	560	3	892132798
7	562	5	891354053
7	563	2	892131978
7	564	3	891354471
7	565	4	892132019
7	566	4	891353411
7	567	1	892132019
7	568	5	891352261
7	570	3	891354639
7	571	3	891353950
7	572	3	891354331
7	573	5	891353828
7	574	5	892132402
7	575	3	892133271
7	576	5	892132943
7	577	2	892133310
7	578	3	891354090
7	579	4	892133361
7	580	3	892132171
7	581	5	891353477
7	582	5	892135347
7	583	2	892132380
7	584	4	891352093
7	585	4	892133180
7	586	3	891354639
7	587	4	891353950
7	588	4	891352261
7	589	5	891352451
7	590	2	891354730
7	591	3	891352179
7	592	5	891353652
7	593	5	891351851
7	594	3	891354114
7	595	2	891353801
7	596	5	891351728
7	597	3	891353744
7	599	1	891353860
7	600	4	891354090
7	601	5	891353744
7	602	3	891352594
7	603	4	891350757
7	604	3	891351547
7	605	4	891353290
7	606	3	891352904
7	608	4	891351653
7	609	3	891352749
7	610	5	891353086
7	611	3	891351161
7	612	5	891351121
7	613	4	891352010
7	614	5	891352489
7	615	4	891351585
7	616	4	891351002
7	617	5	891354588
7	618	4	891350900
7	619	3	891352831
7	620	4	891353892
7	621	5	892132773
7	622	4	891352984
7	623	3	891354217
7	624	4	891353892
7	625	3	892131824
7	626	5	892132773
7	627	3	891352594
7	628	3	891352831
7	629	3	891352526
7	630	5	891352341
7	631	4	891352984
7	632	5	891352261
7	633	5	891351509
7	634	5	891351287
7	635	3	891352864
7	636	4	891351384
7	637	4	891353570
7	638	4	892132122
7	640	3	891353614
7	641	5	892135346
7	642	3	892132277
7	643	4	891350932
7	644	5	891351685
7	645	4	891353614
7	646	5	891351383
7	647	5	891352489
7	648	5	891351653
7	649	5	891353254
7	650	3	891350965
7	651	5	891350932
7	652	3	891352659
7	653	4	891351161
7	654	5	892135347
7	655	5	891351384
7	656	3	891351509
7	657	4	891351234
7	658	3	891352419
7	659	5	891351161
7	660	5	891353051
7	661	5	891351624
7	662	3	892133739
7	663	5	891352220
7	664	3	891353977
7	665	4	891354471
7	666	4	892132192
7	667	5	892135347
7	668	4	891352778
7	669	1	892132020
7	670	5	891353254
7	671	5	891351728
7	672	1	892131925
7	673	3	891353744
7	674	2	891352659
7	675	5	891352947
7	676	3	891354499
7	677	3	891354499
7	678	3	891350356
7	679	5	891353124
7	680	4	891350703
7	681	1	891350594
7	682	2	891350383
7	683	4	891350703
8	7	3	879362287
8	11	3	879362233
8	22	5	879362183
8	50	5	879362124
8	55	5	879362286
8	56	5	879362183
8	79	4	879362286
8	82	5	879362356
8	89	4	879362124
8	96	3	879362183
8	127	5	879362123
8	144	5	879362286
8	172	5	879362123
8	174	5	879362183
8	176	5	879362233
8	177	4	879362233
8	181	4	879362183
8	182	5	879362183
8	183	5	879362233
8	187	4	879362123
8	188	5	879362356
8	190	4	879362183
8	195	5	879362287
8	210	4	879362287
8	222	5	879362356
8	227	4	879362423
8	228	5	879362286
8	229	5	879362356
8	233	4	879362423
8	241	4	879362423
8	258	5	879361482
8	259	1	879361604
8	273	3	879362287
8	294	3	879361521
8	301	4	879361550
8	336	3	879361664
8	338	4	879361873
8	341	2	879361825
8	385	1	879362124
8	403	4	879362234
8	431	2	879362356
8	435	5	879362233
8	457	1	879361825
8	510	4	879362233
8	511	5	879362183
8	518	4	879362422
8	550	3	879362356
8	568	4	879362233
8	651	5	879362123
8	684	4	879362356
8	685	4	879362423
8	686	3	879362356
8	687	1	879361825
8	688	1	879361732
8	689	4	879361873
9	6	5	886960055
9	50	5	886960055
9	201	5	886960055
9	242	4	886958715
9	276	4	886959423
9	286	5	886960055
9	294	4	886959453
9	298	5	886960055
9	340	4	886958715
9	371	5	886960055
9	402	4	886959343
9	479	4	886959343
9	483	5	886960056
9	487	5	886960056
9	507	4	886959343
9	521	4	886959343
9	527	3	886959344
9	615	4	886959344
9	690	1	886959344
9	691	5	886960055
10	1	4	877888877
10	4	4	877889130
10	7	4	877892210
10	11	4	877888677
10	13	3	877892050
10	16	4	877888877
10	22	5	877888812
10	32	4	877886661
10	33	4	877893020
10	48	4	877889058
10	50	5	877888545
10	56	5	877886598
10	59	4	877886722
10	60	3	877892110
10	64	4	877886598
10	69	4	877889131
10	70	4	877891747
10	82	4	877886912
10	98	4	877889261
10	99	5	877889130
10	100	5	877891747
10	116	4	877888944
10	124	5	877888545
10	127	5	877886661
10	129	4	877891966
10	132	5	877893020
10	133	5	877891904
10	134	5	877889131
10	135	5	877889004
10	137	4	877889186
10	144	4	877892110
10	155	4	877889186
10	156	4	877886846
10	157	5	877889004
10	160	4	877888944
10	161	4	877892050
10	162	4	877892210
10	164	4	877889333
10	168	4	877888812
10	170	4	877889333
10	174	4	877886661
10	175	3	877888677
10	176	4	877889130
10	178	5	877888677
10	180	5	877889333
10	182	5	877888876
10	183	5	877893020
10	185	5	877888876
10	186	4	877886722
10	191	5	877888613
10	192	4	877891966
10	194	4	877886661
10	195	4	877889130
10	197	5	877888944
10	199	4	877892050
10	200	5	877889261
10	203	4	877891967
10	205	5	877888812
10	211	5	877889130
10	216	4	877889333
10	218	4	877889261
10	221	4	877888677
10	223	5	877888545
10	230	4	877892210
10	234	4	877888877
10	238	4	877892276
10	245	4	877886281
10	269	4	877886162
10	273	4	877888613
10	274	4	877889333
10	275	4	877888677
10	276	4	877891904
10	283	4	877892276
10	285	5	877889186
10	289	4	877886223
10	294	3	879163524
10	302	4	877886162
10	319	3	877886223
10	321	4	879163494
10	333	4	877886359
10	334	4	877886281
10	340	4	880371312
10	357	5	877889186
10	367	4	877892437
10	371	4	877886912
10	385	4	877886783
10	404	4	877886911
10	414	4	877891966
10	418	4	877886783
10	420	4	877892438
10	430	3	877886597
10	432	4	877892160
10	435	5	877889261
10	447	4	877891747
10	461	3	877888944
10	462	3	877891747
10	463	4	877889186
10	467	4	877891904
10	470	4	877891747
10	474	4	877886783
10	475	4	877888545
10	478	5	877889004
10	480	5	877888943
10	482	4	877889262
10	483	5	877889333
10	486	4	877886846
10	488	5	877888613
10	489	4	877892210
10	493	4	877886661
10	495	4	877892160
10	496	5	877889005
10	497	4	877889261
10	498	5	877889333
10	499	4	877893021
10	502	4	877889261
10	504	5	877892110
10	505	4	877886846
10	509	4	877889005
10	510	5	877892209
10	511	4	877888877
10	513	4	877886598
10	518	4	877886722
10	519	5	877892050
10	521	4	877892110
10	527	4	877886597
10	529	3	877892438
10	530	4	877892210
10	531	5	877886911
10	558	4	877886722
10	582	4	877892276
10	588	4	877886846
10	589	5	877891905
10	602	5	877889057
10	603	5	877886783
10	606	5	877888876
10	611	5	877886722
10	615	4	877892276
10	617	5	877892160
10	629	4	877886722
10	651	4	877888812
10	652	3	877889130
10	654	5	877886597
10	655	5	877891904
10	656	5	877886846
10	657	4	877892110
10	663	3	877886598
10	664	4	877886911
10	692	4	877889261
10	693	4	877886783
10	694	5	877892437
10	695	3	877892050
10	696	4	877892276
10	697	3	877888677
10	698	4	877888877
10	699	4	877893020
10	701	4	877888812
10	702	3	877886722
10	703	5	877892110
10	704	3	877892050
10	705	4	877892050
10	706	4	877888677
10	708	4	877892438
10	709	4	877888613
10	710	4	877892160
10	711	4	877888812
10	712	4	877892438
11	8	4	891904949
11	9	5	891902970
11	12	2	891904194
11	15	5	891903067
11	22	4	891904241
11	24	3	891904016
11	25	3	891903836
11	28	5	891904241
11	29	3	891904805
11	38	3	891905936
11	39	3	891905824
11	40	3	891905279
11	42	3	891905058
11	47	4	891904551
11	51	4	891906439
11	52	3	891904335
11	54	3	891905936
11	56	4	891904949
11	57	2	891904552
11	58	3	891904596
11	69	3	891904270
11	70	4	891904573
11	79	4	891905783
11	83	5	891904335
11	86	4	891904551
11	88	3	891905003
11	90	2	891905298
11	94	3	891905324
11	97	4	891904300
11	98	2	891905783
11	100	4	891902718
11	109	3	891903836
11	110	3	891905324
11	111	4	891903862
11	120	2	891903935
11	121	3	891902745
11	123	3	891902745
11	125	4	891903108
11	135	4	891904335
11	168	3	891904949
11	175	3	891904551
11	176	3	891905783
11	180	2	891904335
11	185	4	891905783
11	190	3	891904174
11	191	4	891904270
11	194	4	891904920
11	196	5	891904270
11	203	4	891905856
11	204	3	891904920
11	208	4	891905032
11	211	3	891905003
11	215	3	891904389
11	216	3	891904949
11	222	3	891902718
11	227	3	891905896
11	228	3	891905824
11	230	4	891905783
11	237	4	891903005
11	238	3	891905032
11	241	4	891906389
11	258	5	891901696
11	259	3	891902270
11	260	1	891902426
11	268	5	891901652
11	274	3	891906510
11	277	5	891903226
11	286	5	891901606
11	290	3	891903877
11	291	4	891902815
11	300	3	891902092
11	301	4	891902157
11	312	4	891902157
11	317	4	891904174
11	318	5	891904194
11	332	5	891901769
11	350	4	891901991
11	357	5	891904241
11	367	3	891905058
11	370	3	891902880
11	372	4	891904968
11	383	2	891905555
11	386	3	891905279
11	395	2	891905349
11	401	3	891905324
11	402	4	891904662
11	405	3	891904016
11	414	3	891905393
11	423	5	891904174
11	425	4	891904300
11	427	4	891904300
11	428	4	891905032
11	429	5	891904335
11	430	3	891905032
11	433	4	891905003
11	434	4	891904270
11	435	4	891904968
11	449	3	891906327
11	455	3	891903862
11	504	3	891905856
11	508	4	891903005
11	517	2	891905222
11	521	2	891904174
11	524	4	891904949
11	526	3	891904859
11	527	4	891904335
11	544	4	891903226
11	549	4	891904617
11	558	3	891904214
11	561	2	891905936
11	573	3	891906327
11	577	3	891905555
11	580	5	891905222
11	597	2	891904037
11	603	4	891905783
11	646	3	891904389
11	652	4	891905003
11	654	3	891905856
11	659	5	891904920
11	660	3	891904573
11	662	3	891904300
11	663	4	891905032
11	690	4	891901716
11	692	4	891905003
11	699	4	891904389
11	707	5	891906389
11	710	2	891905221
11	713	5	891903024
11	714	4	891904214
11	715	3	891904764
11	716	3	891905058
11	717	2	891902815
11	718	5	891903836
11	719	3	891905279
11	720	1	891904717
11	721	3	891905279
11	722	3	891905349
11	723	5	891904637
11	724	3	891904551
11	725	3	891905568
11	726	3	891905515
11	727	3	891904335
11	728	3	891905366
11	729	4	891904637
11	730	3	891904335
11	731	4	891904789
11	732	3	891904596
11	733	4	891904413
11	734	3	891905349
11	735	3	891904300
11	736	4	891906411
11	737	4	891904789
11	738	3	891905324
11	739	3	891906411
11	740	4	891903067
11	741	5	891902745
11	742	3	891902815
11	743	2	891904065
11	744	4	891903005
11	745	5	891905324
11	746	4	891905032
11	748	1	891902270
11	749	5	891901797
11	750	5	891901629
11	751	2	891902092
11	752	4	891902157
12	4	5	879960826
12	15	5	879959670
12	28	5	879958969
12	50	4	879959044
12	71	4	879959635
12	82	4	879959610
12	88	5	879960826
12	96	4	879959583
12	97	5	879960826
12	98	5	879959068
12	132	5	879959465
12	133	4	879959670
12	143	5	879959635
12	157	5	879959138
12	159	4	879959306
12	161	5	879959553
12	168	4	879959513
12	170	4	879959374
12	172	4	879959088
12	174	5	879958969
12	191	5	879960801
12	195	4	879959670
12	196	5	879959553
12	200	1	879959610
12	202	4	879959514
12	204	5	879960826
12	215	4	879959553
12	216	5	879960826
12	228	4	879959465
12	238	5	879960826
12	242	5	879960826
12	276	4	879959488
12	282	5	879960679
12	300	4	879958639
12	318	5	879960826
12	328	4	879958742
12	381	4	879958902
12	392	4	879959025
12	402	5	879960826
12	416	3	879959025
12	471	5	879959670
12	591	5	879959212
12	684	5	879959105
12	708	3	879959394
12	735	5	879960826
12	753	5	879960679
12	754	4	879958810
13	1	3	882140487
13	2	3	882397650
13	4	5	882141306
13	5	1	882396869
13	7	2	882396790
13	11	1	882397146
13	12	5	881515011
13	13	5	882141617
13	14	4	884538727
13	17	1	882396954
13	21	3	882399040
13	22	4	882140487
13	23	5	882139937
13	24	1	882397741
13	25	1	882141686
13	27	3	882397833
13	29	2	882397833
13	32	4	882140286
13	33	5	882397581
13	37	1	882397011
13	38	3	882397974
13	39	3	882397581
13	40	2	886302815
13	42	4	882141393
13	45	3	882139863
13	48	5	882139863
13	49	4	882399419
13	50	5	882140001
13	51	3	882399419
13	53	1	882396955
13	56	5	881515011
13	58	4	882139966
13	59	4	882140425
13	61	4	882140552
13	62	5	882397833
13	64	5	882140037
13	66	3	882141485
13	67	1	882141686
13	68	3	882397741
13	69	4	884538766
13	70	3	882140691
13	71	4	882398654
13	72	4	882141727
13	73	3	882141485
13	78	1	882399218
13	79	3	882139746
13	82	2	882397503
13	83	2	886303585
13	86	1	881515348
13	87	5	882398814
13	88	4	882141485
13	89	4	882139717
13	90	3	882141872
13	91	2	882398724
13	92	3	882397271
13	94	3	882142057
13	95	5	882140104
13	96	4	882140104
13	97	4	882399357
13	98	4	881515011
13	99	4	882398654
13	100	5	882140166
13	109	4	882141306
13	110	3	882141130
13	111	5	882140588
13	117	3	882398138
13	118	4	882397581
13	121	5	882397503
13	124	5	884538663
13	127	5	881515411
13	128	1	882397502
13	132	4	882140002
13	137	5	882139804
13	138	1	882399218
13	143	1	882140205
13	144	4	882397146
13	145	2	882397011
13	147	3	882397502
13	150	5	882140588
13	152	5	882141393
13	153	4	882139901
13	154	5	882141335
13	155	2	882399615
13	157	3	882140552
13	158	1	882142057
13	160	4	882140070
13	161	5	882397741
13	163	3	882141582
13	164	3	882396790
13	165	3	881515295
13	167	4	882141659
13	168	4	881515193
13	170	5	882139774
13	172	5	882140355
13	173	2	882139863
13	174	4	882139829
13	175	4	882139717
13	177	5	882397271
13	178	4	882139829
13	179	2	882140206
13	180	5	882141248
13	181	5	882140354
13	183	4	882397271
13	184	1	882397011
13	185	3	881515011
13	186	4	890704999
13	187	5	882140205
13	190	4	882397145
13	191	3	881515193
13	193	5	882139937
13	194	5	882141458
13	195	3	881515296
13	196	4	882140552
13	197	4	881515239
13	198	3	881515193
13	199	5	882140001
13	200	3	882140552
13	201	1	882396869
13	202	5	882141425
13	204	5	882140318
13	205	2	881515193
13	208	5	882140624
13	209	3	882141306
13	210	3	882140455
13	211	4	882140002
13	212	5	882399385
13	215	5	882140588
13	216	3	881515193
13	217	1	882396955
13	219	1	882396955
13	222	3	882140285
13	223	5	882139901
13	224	4	882140166
13	226	4	882397651
13	227	5	882397650
13	228	4	882140389
13	229	4	882397650
13	230	3	882397503
13	231	3	882397582
13	232	3	890704999
13	233	4	882397650
13	234	5	882140252
13	235	2	882141841
13	237	5	882140285
13	238	3	881515411
13	239	4	882141752
13	241	3	882397502
13	243	3	882140966
13	258	4	882139327
13	261	1	883670785
13	262	4	881514876
13	263	5	881515647
13	264	4	882140848
13	265	4	882140038
13	268	4	881514810
13	269	2	889292060
13	270	4	881514876
13	271	1	881514876
13	272	4	884538403
13	273	3	882397502
13	274	3	882399384
13	275	3	886303585
13	276	5	882140104
13	279	5	882139804
13	281	3	882397974
13	286	3	881514683
13	287	1	882141459
13	288	1	882396790
13	289	2	882140759
13	290	4	882141814
13	292	5	882140867
13	294	2	881514683
13	299	3	881515698
13	300	1	881515736
13	301	1	882140718
13	302	5	881514811
13	303	4	881514876
13	305	4	881514811
13	306	3	881514876
13	307	2	881514684
13	308	3	881514726
13	310	4	881514683
13	311	3	881514726
13	312	1	883670630
13	313	4	882774047
13	314	1	884538485
13	315	5	884538466
13	316	5	888073653
13	317	5	882140552
13	318	3	882139686
13	319	4	882139327
13	320	1	882397010
13	321	2	882140740
13	322	3	882140792
13	323	3	882140848
13	326	3	882140792
13	327	3	881515521
13	328	3	881514811
13	329	2	886952246
13	331	3	881515457
13	332	3	881515457
13	333	3	881514810
13	334	1	886952467
13	338	1	882140740
13	339	3	882140718
13	340	2	881514684
13	341	2	886952422
13	342	4	885744650
13	343	1	883670672
13	344	2	888073635
13	345	4	884538366
13	346	4	883670552
13	347	5	885185824
13	348	2	886952246
13	349	1	892387807
13	350	2	886302293
13	351	1	886302385
13	353	4	886261450
13	354	2	888779458
13	355	3	888688733
13	357	3	881515411
13	360	4	882140926
13	363	3	882398076
13	367	3	882141458
13	370	1	882396984
13	371	3	882399385
13	377	1	882399219
13	379	1	882396984
13	382	1	882140624
13	384	2	882141814
13	385	3	882397502
13	387	3	886304229
13	391	3	882398255
13	393	3	882141617
13	394	2	882399615
13	396	3	882141727
13	398	2	882398410
13	401	1	882141841
13	402	4	886303934
13	403	2	882397271
13	404	5	882399014
13	405	2	882397742
13	406	1	882397011
13	409	3	882141872
13	410	1	882141997
13	411	2	882141924
13	413	1	882396984
13	414	5	882141458
13	416	3	882398934
13	417	2	882398934
13	418	2	882398763
13	419	3	882398814
13	420	4	882398691
13	421	2	882140389
13	423	5	882398814
13	424	1	882397068
13	427	5	882398814
13	428	5	882140588
13	430	5	882139495
13	431	1	882397271
13	433	4	881515239
13	435	5	882141392
13	436	2	882396869
13	437	1	882397068
13	438	1	882397068
13	439	1	882397040
13	440	1	882397040
13	441	1	882396984
13	442	1	890705056
13	443	4	882140588
13	444	4	882396984
13	447	2	882396869
13	448	1	882396869
13	449	4	882398385
13	450	3	882398494
13	451	1	882141872
13	452	3	882397039
13	453	2	882397067
13	455	3	882141425
13	457	1	883670785
13	462	5	882140487
13	463	5	882140318
13	467	5	882140588
13	471	1	882140455
13	472	5	882398327
13	473	4	882398724
13	474	4	881515112
13	475	3	881515113
13	476	2	882141997
13	477	4	882398934
13	478	4	884538571
13	480	3	881515193
13	481	3	882140038
13	482	5	882140355
13	483	5	882139774
13	484	5	882139804
13	485	1	882140624
13	488	3	890704999
13	491	4	882140166
13	492	5	882140552
13	493	5	882140206
13	494	4	881515295
13	497	5	882140166
13	498	4	882139901
13	501	5	882398724
13	502	5	882141458
13	504	5	881515011
13	505	3	882140389
13	506	5	882140691
13	507	1	882140070
13	508	3	882140426
13	509	5	882140691
13	510	5	882139717
13	511	5	882139863
13	514	5	881515112
13	516	5	882141485
13	517	5	882139746
13	518	4	882140252
13	519	5	882140355
13	520	4	886302261
13	523	4	882141306
13	524	4	886302261
13	526	3	882141053
13	527	5	882140252
13	529	4	882140206
13	530	5	881515295
13	531	3	882140104
13	538	1	884538448
13	539	1	883670785
13	540	3	882398410
13	546	3	882397741
13	547	1	882397011
13	548	3	882398743
13	550	4	882397741
13	551	1	882397084
13	553	2	882399419
13	554	2	882397833
13	558	1	882397011
13	559	1	882396913
13	561	1	882396914
13	563	1	882397039
13	564	1	882396913
13	565	1	882397040
13	566	5	882397502
13	567	1	882396955
13	568	3	882140552
13	569	2	882396955
13	570	5	882397581
13	572	2	882398255
13	573	3	882396955
13	576	3	882398076
13	578	3	882397974
13	585	4	882141814
13	586	3	882398326
13	588	4	882398763
13	589	3	881515239
13	596	3	882398691
13	597	3	882397650
13	601	4	882140104
13	602	4	884538634
13	603	4	884538571
13	604	5	882139966
13	606	4	882140130
13	610	2	882140690
13	612	4	882140318
13	613	4	881515411
13	614	4	884538634
13	615	4	881515348
13	617	3	881515112
13	619	3	886952245
13	621	4	882398934
13	624	5	882398691
13	625	2	882398691
13	630	2	886302261
13	631	3	882140624
13	632	3	884538664
13	635	1	882396984
13	636	2	882397502
13	637	2	882396913
13	638	3	881515239
13	639	3	882139804
13	646	4	882140037
13	647	5	882140206
13	650	2	882140425
13	651	5	882140070
13	652	5	882141458
13	654	5	881515295
13	655	5	886261387
13	656	5	882139746
13	657	4	882139829
13	659	3	882141335
13	661	5	881515411
13	662	5	882399420
13	663	5	882140252
13	665	2	882396984
13	667	1	882397040
13	668	1	882397068
13	669	1	882397067
13	670	3	882396955
13	672	1	882396914
13	673	3	882140691
13	674	3	882396955
13	675	5	882396955
13	678	3	882140792
13	679	4	882397650
13	682	1	883670742
13	683	1	886952521
13	684	5	882397271
13	685	5	882397582
13	686	5	882397146
13	687	1	883670705
13	688	1	883670819
13	689	2	881515735
13	690	3	881514811
13	691	4	889316404
13	692	4	882141659
13	694	4	890704999
13	705	5	884538766
13	706	1	882396869
13	709	4	882139863
13	712	4	882141872
13	716	4	882141393
13	720	4	882397974
[truncated: 78,000 more rows]
