# Supplementary material
Source: ML conference proceedings conference paper supplement (https://proceedings.neurips.cc/paper_files/paper/2022/hash/01ecd39ca49ddecc5729ca996304781b-Abstract.html)
Supplement: Supplementary file 1 [file 01ecd39ca49ddecc5729ca996304781b-Supplemental-Conference.zip › supplementary NEURIPS 2022/CODE_supplementary/data/ml-100k/u5.test]

1	3	4	878542960
1	13	5	875071805
1	15	5	875071608
1	18	4	887432020
1	19	5	875071515
1	28	4	875072173
1	29	1	878542869
1	52	4	875072205
1	59	5	876892817
1	83	3	875072370
1	88	4	878542791
1	94	2	875072956
1	111	5	889751711
1	122	3	875241498
1	126	2	875071713
1	152	5	878542589
1	172	5	874965478
1	204	5	875072688
1	207	5	875073067
1	231	1	876893031
1	244	2	887431973
2	275	5	888550939
2	286	4	888549960
2	296	3	888550871
2	302	5	888552084
3	340	5	889237455
3	346	5	889237455
3	353	1	889237122
4	301	5	892002353
4	360	5	892002352
5	105	3	875635443
5	174	5	875636130
5	200	2	875720717
5	210	3	875636099
5	233	4	875729064
5	368	1	875635457
5	373	3	875635907
5	375	3	875637587
5	380	3	875637191
5	383	3	875636588
5	419	3	875636815
5	448	2	875720692
6	8	4	883600657
6	111	2	883599478
6	182	4	883268776
6	202	3	883602690
6	216	5	883601500
6	237	2	883599914
6	285	3	883599431
6	306	4	883268246
6	490	5	883601365
6	496	4	883601155
6	533	4	883599830
6	537	4	883601277
6	539	2	883681433
7	12	5	892135346
7	50	5	891351042
7	86	4	891350810
7	144	5	891351201
7	152	4	891351851
7	164	5	891351813
7	173	5	891351002
7	197	4	891351082
7	198	3	891351685
7	211	5	891352557
7	309	3	891350704
7	317	4	892133670
7	357	5	892135347
7	367	5	891350810
7	421	3	891352134
7	441	2	891354257
7	509	5	891352778
7	521	5	891353124
7	561	4	891354611
7	569	4	892131978
7	598	3	891353801
7	607	3	891352831
7	639	5	891353676
8	243	2	879361732
8	260	3	879361665
8	358	2	879361732
8	566	3	879362423
9	7	4	886960030
9	385	5	886960055
10	9	4	877889005
10	12	5	877886911
10	23	5	877886911
10	40	4	877892438
10	85	4	877892438
10	93	4	877892160
10	153	4	877886722
10	179	5	877889004
10	198	3	877889005
10	286	4	877886162
10	479	5	877891966
10	484	5	877891904
10	525	5	877892210
10	604	4	877892110
10	610	4	877888613
10	686	4	877886911
10	700	4	877892277
10	707	5	877886783
11	11	2	891904271
11	107	4	891903276
11	173	5	891904920
11	213	4	891906389
11	229	4	891905878
11	239	4	891904617
11	324	1	891902222
11	356	4	891906327
11	365	3	891904764
11	382	3	891904573
11	393	4	891905222
11	399	3	891905279
11	431	2	891905896
11	451	2	891905003
11	747	3	891906426
12	69	5	879958902
12	127	4	879959488
12	203	3	879959583
12	480	4	879959161
13	8	4	882140001
13	9	3	882140205
13	28	5	882398814
13	60	4	884538767
13	116	5	882140455
13	135	5	882139541
13	141	2	890705034
13	166	5	884538663
13	176	3	882140455
13	182	5	882139347
13	188	4	882140130
13	218	1	882396869
13	225	2	882399156
13	242	2	881515193
13	260	1	882140848
13	280	4	882399528
13	285	5	882139937
13	336	2	882140848
13	358	3	881515521
13	362	4	890704999
13	400	4	885744650
13	429	5	884538727
13	432	4	882398654
13	445	4	882139774
13	446	1	882397039
13	515	2	881515193
13	522	5	882140425
13	525	5	882140624
13	541	1	882397650
13	549	4	882399357
13	590	2	882397068
13	629	1	882141582
13	671	3	882396790
13	756	2	886302858
13	778	3	886302694
13	793	5	882141841
13	798	2	882397974
13	803	3	882398255
13	811	5	882139829
13	813	1	882139863
13	822	3	884538634
13	825	1	882397651
13	834	1	882397068
13	837	4	882139717
13	841	1	882398076
13	870	3	882397271
13	882	3	886952438
13	893	3	882774005
13	899	1	892015288
13	904	1	892015178
13	905	2	886302261
14	19	5	880929651
14	25	2	876965165
14	276	4	879119390
14	382	5	879119739
14	524	5	879119497
14	525	5	890881557
14	588	4	890881433
14	663	5	879119651
15	225	3	879456447
15	322	3	879455262
15	845	2	879456108
15	938	3	879455233
16	33	2	877722001
16	39	5	877720118
16	66	4	877719075
16	127	5	877719206
16	135	4	877720916
16	367	3	877726390
16	410	5	877718107
16	480	5	877720297
16	943	3	877719206
17	222	3	885272751
17	269	4	885165619
17	276	4	885272654
18	15	4	880131054
18	28	3	880129527
18	50	4	880130155
18	56	5	880129454
18	83	5	880129877
18	116	5	880131358
18	127	5	880129668
18	133	5	880130713
18	142	4	880131173
18	174	4	880130613
18	187	5	880130393
18	212	5	880129990
18	317	5	880131144
18	357	4	880129421
18	381	4	880131474
18	604	5	880129731
18	612	4	880131591
18	724	4	880132055
18	952	2	880130582
18	959	3	880131450
18	962	4	880131631
18	967	3	880131901
19	294	3	885412034
20	15	4	879667937
20	22	5	879669339
20	50	3	879667937
20	82	4	879669697
20	204	3	879670039
20	243	4	879667799
20	323	4	879667684
21	1	5	874951244
21	9	5	874951188
21	15	4	874951188
21	53	4	874951820
21	127	5	874951188
21	264	3	874950972
21	273	4	874951349
21	286	3	874950889
21	321	3	874950972
21	323	2	874950972
21	330	4	874951040
21	408	5	874951188
21	672	3	874951727
21	858	1	874951858
21	873	2	874950932
21	876	2	874950932
21	877	2	874950972
21	987	3	874951616
21	991	2	874951039
22	68	4	878887925
22	174	5	878887765
22	209	4	878886518
22	233	3	878888066
22	265	3	878888066
22	385	4	878887869
22	526	4	878888026
22	731	3	878887116
22	792	4	878886647
22	998	1	878886571
23	73	3	874787016
23	173	5	874787587
23	176	3	874785843
23	181	4	874784337
23	227	3	874787738
23	387	3	874786098
23	449	2	874787083
23	451	2	874787256
23	603	4	874785448
23	642	3	874785843
23	919	5	874784440
24	7	4	875323676
24	58	3	875323745
24	97	4	875323193
24	151	5	875322848
24	223	5	875322727
24	276	5	875322951
24	324	5	875322875
24	518	4	875323552
24	699	3	875323051
24	1007	5	875322758
25	7	4	885853155
25	79	4	885852757
25	82	4	885852150
25	86	4	885852248
25	125	5	885852817
25	176	4	885852862
25	177	3	885852488
25	612	4	885852120
25	657	4	885852720
25	692	4	885852656
26	122	1	891380200
26	248	3	891377468
26	282	4	891373086
26	288	4	891347477
26	323	2	891349184
26	328	2	891348011
26	471	2	891371676
26	515	4	891352940
26	683	3	891350372
26	760	1	891383899
26	845	3	891377468
26	936	4	891352136
26	1010	2	891377609
26	1013	1	891383836
27	123	5	891543191
27	1017	4	891542897
28	196	4	881956081
28	434	4	881961104
28	444	3	881961728
28	529	4	881957310
28	588	3	881957425
28	603	3	881957090
30	29	3	875106638
30	69	5	885941156
30	135	5	885941156
30	319	4	875060217
30	780	4	875060217
31	192	4	881548054
31	611	4	881548111
32	50	4	883717521
32	181	4	883717628
32	408	3	883717684
32	628	4	883718121
33	288	4	891964066
33	300	4	891964131
34	288	2	888601628
34	289	1	888602950
34	898	5	888602842
34	899	5	888603123
34	991	4	888602618
35	321	3	875458970
37	62	5	880916070
37	121	2	880915528
37	226	5	880916010
37	233	4	880916046
37	472	2	880915711
37	568	3	880915942
38	162	5	892431727
38	185	2	892432573
38	195	1	892429952
38	413	1	892434626
38	420	5	892429347
38	433	5	892433771
38	447	5	892434430
38	451	5	892431727
38	627	5	892431586
38	673	5	892432062
38	678	5	892428658
38	768	5	892433062
38	1029	1	892434626
38	1032	4	892432624
38	1037	4	892434283
39	288	5	891400704
39	302	5	891400188
39	319	4	891400094
40	302	3	889041283
40	346	2	889041358
41	50	5	890687066
41	135	4	890687473
41	156	4	890687304
41	173	4	890687549
41	191	4	890687473
41	205	4	890687353
41	514	4	890687042
41	969	4	890687438
42	2	5	881109271
42	87	4	881107576
42	103	3	881106162
42	136	4	881107329
42	168	3	881107773
42	282	4	881105677
42	411	4	881106317
42	433	2	881108760
42	591	4	881110138
42	658	2	881107502
42	735	4	881108548
42	755	4	881108425
43	73	4	883956099
43	123	1	875975520
43	143	4	883955247
43	202	5	875981190
43	226	3	883956442
43	254	3	875975323
43	580	3	883956417
43	591	5	875975656
43	731	4	875981190
43	892	3	883954776
43	1055	2	883955969
44	22	4	878347942
44	31	4	878348998
44	97	2	878348000
44	151	4	878341370
44	173	5	878348725
44	175	4	878347972
44	181	4	878341290
44	183	4	883613372
44	190	5	878348000
44	198	4	878348947
44	201	2	878347392
44	307	4	878340940
44	318	5	878347340
44	432	5	878347569
44	633	3	878347633
44	692	3	878347532
45	24	3	881014550
45	764	4	881015310
45	826	3	881015386
45	993	4	881014785
46	262	5	883614766
46	286	5	883611352
47	262	5	879439040
47	305	5	879439040
47	1022	3	879440429
48	193	2	879434751
48	302	4	879434954
48	428	4	879434608
48	650	3	879434819
49	2	1	888069606
49	12	4	888068057
49	99	4	888067031
49	121	1	888068100
49	147	1	888069416
49	154	5	888068715
49	174	1	888067691
49	200	3	888067358
49	208	4	888068715
49	225	2	888068651
49	235	2	888068990
49	256	4	888066215
49	283	3	888066086
49	289	4	888065744
49	300	1	888065577
49	404	3	888067765
49	475	4	888066109
49	477	2	888067727
49	577	1	888069329
49	652	5	888066446
49	702	3	888066614
49	715	3	888069040
49	789	4	888068033
49	813	3	888068686
49	904	2	888065527
49	1069	3	888068912
49	1073	5	888066424
52	7	5	882922204
52	191	5	882923031
52	277	5	882922661
52	288	3	882922454
53	15	5	879443027
54	148	3	880937490
55	7	3	878176047
55	174	4	878176397
56	28	5	892678669
56	66	3	892911110
56	193	5	892678669
56	281	2	892683611
56	295	3	893257941
56	393	4	892677047
56	405	4	892679460
56	575	3	892911469
56	636	4	892683533
56	748	4	892676028
56	871	2	892910207
56	1074	3	892683941
56	1091	2	892737210
57	1	5	883698581
57	121	4	883697432
57	144	3	883698408
57	168	3	883698362
57	257	5	883698580
57	717	4	883697960
58	7	5	884304656
58	56	5	884305369
58	168	5	891611548
58	191	5	892791893
58	200	3	884305295
58	223	5	884305150
58	238	5	884305185
58	354	3	890321652
58	491	4	891611593
58	584	5	884305271
58	730	5	884305004
58	823	1	892242419
59	4	4	888205188
59	28	5	888204841
59	53	5	888206161
59	73	4	888206254
59	81	4	888205336
59	86	3	888205145
59	90	2	888206363
59	91	4	888205265
59	116	4	888203018
59	129	5	888202941
59	143	1	888204641
59	243	1	888206764
59	273	2	888203129
59	380	3	888205956
59	392	2	888206562
59	505	4	888204260
59	507	4	888204877
59	517	5	888205714
59	526	4	888204928
59	602	2	888206295
59	608	4	888204502
59	658	4	888205188
59	727	2	888205265
59	946	1	888206445
59	953	5	888205787
59	969	3	888204802
59	1114	5	888203415
59	1120	1	888203900
60	15	4	883328033
60	135	5	883327087
60	141	3	883327472
60	228	4	883327472
60	419	3	883327612
60	423	4	883326593
60	483	5	883326497
60	519	4	883326370
60	592	4	883327566
60	601	4	883325944
60	603	5	883326652
61	301	1	891206450
62	7	4	879372277
62	15	2	879372634
62	64	4	879373638
62	76	4	879374045
62	116	3	879372480
62	117	4	879372563
62	151	5	879372651
62	191	5	879373613
62	215	3	879374640
62	275	4	879372325
62	276	5	879372182
62	285	4	879372455
62	509	4	879373568
62	528	5	879375080
62	673	2	879375323
62	747	3	879375247
62	924	1	879373175
62	931	1	879373522
63	10	4	875748004
63	121	1	875748139
63	137	4	875747368
63	181	3	875747556
63	257	3	875747342
63	283	4	875747401
63	285	3	875747470
63	294	2	875747047
63	322	2	875746986
63	993	2	875747635
64	10	5	889739733
64	172	4	889739091
64	184	4	889739243
64	197	3	889737506
64	241	3	889739380
64	347	3	889737062
64	356	3	889740154
64	389	4	889739834
64	435	4	889737771
64	496	5	889737567
64	503	4	889740342
64	651	4	889740795
64	693	3	889737654
64	732	4	889739288
64	919	4	889739834
65	9	5	879217138
65	66	3	879217972
65	77	5	879217689
65	178	5	879217689
65	194	4	879217881
65	237	4	879217320
65	392	5	879217689
65	471	4	879217434
66	9	4	883601265
66	257	3	883601355
66	300	5	883601089
66	1016	3	883601859
67	117	5	875379794
67	273	4	875379288
67	1047	3	875379750
68	926	1	876974298
69	222	3	882072956
69	628	3	882126125
70	1	4	884065277
70	94	3	884151014
70	172	5	884064217
70	227	3	884067476
70	380	3	884066399
70	418	3	884149806
70	449	2	884065247
70	739	2	884150753
70	946	3	884150691
70	993	3	884064688
70	1030	2	884151801
71	6	3	880864124
71	98	4	885016536
71	100	4	877319197
72	23	4	880036550
72	81	3	880036876
72	106	4	880036185
72	197	5	880037702
72	237	3	880036346
72	271	1	880036346
72	403	3	880037277
72	649	4	880036783
72	770	4	880037306
72	844	4	880035708
73	96	2	888626523
73	129	4	888625907
73	183	4	888626262
73	188	5	888625553
73	246	3	888792938
73	285	4	888792900
73	514	4	888626153
74	300	3	888333194
74	331	4	888333352
74	358	2	888333372
75	129	3	884049939
75	222	5	884050194
75	473	3	884050733
75	864	4	884049876
75	866	2	884050733
76	24	2	882607536
76	96	5	875312034
76	293	4	879117673
76	806	4	882606471
76	851	4	879576570
76	919	3	875027945
76	1159	3	882606623
77	42	5	884752948
77	98	4	884752901
77	134	4	884752562
77	183	5	884732606
77	191	3	884752948
77	222	4	884732873
77	228	3	884753105
77	636	2	884753061
78	411	4	879634223
79	236	5	891271719
79	285	5	891271652
79	763	5	891271741
80	64	5	887401475
80	887	4	887401236
81	79	5	876534817
81	210	4	876534704
81	717	2	876533824
82	22	3	878769777
82	118	3	878768510
82	134	4	878769442
82	212	4	878769410
82	237	3	876311319
82	318	4	878769629
82	435	5	878769409
82	483	5	878769888
82	484	4	878769597
82	582	4	878769410
82	603	5	878769479
82	660	5	878769848
82	1059	1	884714456
83	50	3	880327590
83	88	5	880308186
83	151	3	880306745
83	245	2	891181703
83	479	5	880307699
83	704	3	880327216
83	845	3	880306648
83	944	3	880308871
83	1049	3	880307588
84	408	5	883450553
84	591	4	883451664
84	756	3	883452765
84	815	4	883452462
85	161	4	882819528
85	162	2	879454235
85	172	4	882813285
85	181	4	882813312
85	196	4	879454952
85	325	2	879452386
85	333	1	886282927
85	474	5	879454500
85	482	4	879454304
85	520	3	882996257
85	663	5	879454437
85	715	4	882995967
85	745	3	879829021
85	1039	4	879453903
85	1075	3	879454400
85	1166	4	879455021
86	259	4	879570423
86	326	3	879570423
86	1176	5	879570973
87	56	4	879876524
87	128	3	879876037
87	134	4	879877740
87	152	4	879876564
87	180	4	879875649
87	194	5	879876403
87	372	3	879876565
87	396	1	879877280
87	598	2	879877279
87	648	5	879876448
87	685	3	879875856
87	715	3	879876885
87	849	5	879875996
87	1118	3	879877007
87	1178	3	879877208
87	1180	3	879877127
87	1186	3	879876886
88	326	5	891038103
89	25	5	879441637
89	107	5	879441780
89	173	5	879459859
89	402	4	879460347
89	405	3	879441586
89	451	3	879459884
90	23	5	891384997
90	60	4	891385039
90	69	1	891383424
90	135	5	891384570
90	137	5	891384754
90	196	4	891385250
90	215	2	891385335
90	276	4	891384476
90	491	4	891384959
90	498	5	891383173
90	500	4	891384721
90	516	5	891383987
90	708	5	891385787
90	730	5	891384147
90	753	4	891385751
90	847	5	891383753
90	942	4	891385165
91	79	5	891439018
91	183	5	891438909
91	294	3	891438288
91	300	4	891438004
91	333	5	891438106
91	474	3	891438947
91	527	4	891439057
91	662	4	891439439
92	13	4	886443292
92	25	3	875640072
92	40	3	875656164
92	63	3	875907504
92	65	4	875653960
92	69	5	875653198
92	108	2	886443416
92	147	2	875640542
92	149	3	886443494
92	155	2	875654888
92	169	5	875653121
92	212	4	875656086
92	217	3	875657595
92	225	3	875640740
92	233	3	875654732
92	239	4	875654125
92	260	1	890463551
92	369	3	886443672
92	418	3	875653769
92	433	5	875654665
92	597	2	886443328
92	631	4	875658112
92	761	2	875907134
92	841	3	886443455
92	855	5	875653162
92	922	1	875644796
92	926	3	875640542
92	1037	2	875907702
92	1052	2	890251841
92	1194	4	875654432
92	1210	1	875907179
93	14	4	888705200
93	118	3	888705416
93	934	3	888705988
94	71	4	891721642
94	86	5	891720971
94	127	5	885870175
94	134	5	886008885
94	151	5	891721716
94	159	3	891723081
94	182	5	885873089
94	188	4	885870665
94	226	2	891721238
94	233	3	891722934
94	248	4	891724341
94	293	4	891724044
94	338	4	891725030
94	355	2	891725090
94	367	4	891723328
94	412	2	891724485
94	474	5	885870322
94	559	4	891721777
94	584	4	885872942
94	622	3	891722609
94	631	5	891720950
94	690	4	891928703
94	721	2	891721078
94	737	4	891723459
94	823	3	891722458
94	997	4	891723190
94	1007	4	891724282
94	1010	4	891721117
94	1065	4	885872942
94	1101	3	891720590
94	1140	2	891723328
94	1219	4	891722306
95	50	5	879197329
95	52	4	879198800
95	110	2	880572323
95	194	5	879197603
95	219	4	880572658
95	227	2	880572356
95	238	5	880570823
95	294	2	884266083
95	386	2	880572356
95	392	3	880571428
95	433	4	880571950
95	450	2	880572787
95	462	4	879197022
95	473	4	879193353
95	507	4	880571226
95	623	3	880572388
95	631	4	880573627
95	648	3	888954170
95	671	3	880571045
95	679	2	879196513
95	946	3	888956489
95	1222	2	880572602
96	196	4	884403057
96	234	4	884403336
96	423	5	884403057
96	514	4	884402977
97	208	5	884239744
97	423	5	884239472
98	194	5	880498898
98	659	5	880498861
99	98	5	885679596
99	174	5	885679705
99	294	4	885678453
99	329	4	886518562
99	348	4	886518562
99	433	4	886780105
99	473	4	885679353
99	544	4	885679183
99	789	4	885680176
99	1047	4	885679472
100	271	3	891375260
100	315	5	891375557
100	346	3	891375630
100	751	4	891374868
100	885	2	891375359
100	898	4	891375454
101	472	3	877136711
101	595	2	877136391
101	763	3	877136789
101	831	3	877136954
101	1028	3	877136449
102	1	3	883748352
102	2	2	888801522
102	7	2	888801407
102	154	3	888803708
102	172	3	888801232
102	174	4	888801360
102	227	4	888801673
102	272	3	888112484
102	301	3	885697464
102	316	3	889362833
102	684	2	888802176
102	792	3	892992297
102	879	3	879443144
102	1076	2	883748527
103	56	5	880416602
103	98	3	880420565
104	9	2	888465201
104	121	2	888466002
104	310	2	888442275
104	328	3	888442249
104	407	2	888465936
104	471	3	888465290
104	678	2	888442404
105	347	3	889214334
105	751	2	889214381
105	880	3	889214335
106	9	4	883876572
106	59	4	881453318
106	70	3	881452355
106	82	3	881453290
106	318	5	881449830
106	463	3	881453413
107	1243	3	891264466
109	22	4	880572950
109	28	3	880572721
109	50	5	880563331
109	56	5	880577804
109	180	3	880581127
109	250	2	880563471
109	358	2	880562908
109	385	4	880577961
109	410	1	880564534
109	476	3	880571831
109	595	3	880572108
109	831	2	880572296
109	871	2	880572350
109	924	3	880564415
109	1135	4	880582976
109	1139	2	880583463
109	1161	3	880564678
109	1210	3	880582230
110	29	3	886988374
110	31	3	886989057
110	67	3	886989566
110	403	3	886988134
110	569	4	886988321
110	576	2	886988574
110	585	2	886989473
110	651	4	886988018
110	739	4	886988937
110	947	3	886988574
110	1228	3	886988689
110	1229	3	886988374
111	304	4	891679840
112	315	5	891299783
112	332	4	886398611
112	690	4	884992462
112	888	4	886398699
113	300	3	875075887
113	333	4	875935609
113	742	3	875076827
113	975	5	875936424
113	979	5	875936424
114	135	4	881260611
114	171	4	881309511
114	172	5	881259495
114	200	3	881260409
114	224	3	881259839
114	522	5	881309662
114	527	3	881309586
115	83	3	881172183
115	100	5	881171982
115	117	4	881171009
115	185	5	881171409
115	192	5	881171137
115	218	3	881171623
115	302	4	881169559
115	508	5	881170438
115	558	5	881171203
115	628	5	881169883
115	644	3	881172183
115	696	4	881169984
116	124	3	876453733
116	127	5	876454257
116	269	3	886309452
116	270	3	879864042
116	275	2	876453519
116	311	3	886978067
116	326	2	876453376
116	532	2	876452651
116	596	5	876452854
116	650	2	876452806
116	690	3	877934548
116	1244	2	876453191
117	164	5	881011727
117	249	4	880125911
117	252	3	881010322
117	271	4	880124397
117	282	5	880126295
117	895	2	886019030
117	1059	3	881008632
118	5	2	875385256
118	100	5	875384751
118	179	5	875384612
118	234	5	875385386
118	427	5	875384751
119	93	4	874775262
119	172	4	874782191
119	196	5	886177162
119	257	4	874775614
119	258	2	887037225
119	271	4	886175150
119	287	4	874775465
119	315	5	886175571
119	323	4	874774449
119	349	3	887038665
119	471	4	886177338
119	492	5	874781198
119	655	5	874781628
119	727	5	887038711
119	1137	5	886176922
119	1264	3	886176993
120	50	4	889489973
120	118	2	889490979
120	515	5	889489772
121	1	4	891388475
121	11	2	891387992
121	292	4	891388960
121	315	4	891389282
121	318	5	891390013
121	458	1	891388847
122	28	4	879270084
122	197	5	879270482
122	519	4	879270129
122	699	5	879270541
122	1074	4	879270901
123	134	4	879872275
123	187	4	879809943
123	294	1	879809529
123	321	4	879809220
123	1269	2	879872867
124	1	3	890287733
125	66	5	879455184
125	67	5	892838865
125	82	5	879454386
125	85	3	892838424
125	95	5	879454628
125	222	5	892836465
125	289	5	892835854
125	571	3	892838827
125	710	5	879454699
125	763	3	892836574
125	1037	2	892839143
126	286	3	887853469
126	303	3	887854825
126	310	2	887854652
126	881	5	887938392
128	28	5	879966785
128	117	5	879967631
128	180	5	879967174
128	275	5	879967016
128	380	4	879968946
128	507	4	879966685
128	1136	3	879969084
129	310	2	883244011
130	7	5	874953557
130	17	5	875217096
130	88	2	875217265
130	93	5	874953665
130	117	5	874953895
130	121	5	876250746
130	144	5	875216717
130	203	4	875801716
130	219	5	876252472
130	233	4	875801750
130	239	4	878538071
130	258	4	874953526
130	272	5	888962577
130	293	5	874953769
130	330	4	874953424
130	444	4	880396495
130	681	3	875801315
130	751	5	884623756
130	752	5	888211864
130	761	3	876251650
130	771	2	878537631
130	794	5	875802137
130	819	3	874953825
130	824	3	875801830
130	1278	5	876251127
131	536	5	883681723
132	100	4	891278744
132	664	5	891278996
132	806	3	891278896
132	1019	3	891278867
133	271	5	890588766
133	355	2	890588928
134	338	4	891732532
135	5	3	879857868
135	38	3	879858003
135	226	3	879857956
136	257	3	882693234
136	258	5	882693234
137	79	5	881433689
137	690	2	881432482
138	147	4	879023779
138	497	5	879023947
138	742	4	879023245
139	475	5	879538415
139	744	5	879538169
140	288	3	879013617
140	303	5	879013684
140	321	4	879013651
140	988	3	879013719
141	181	4	884584709
141	294	4	884584247
141	591	4	884584865
141	742	4	884584930
141	866	5	884585071
141	988	3	884584460
141	1040	3	884585547
142	91	5	888640404
142	134	5	888640356
142	268	5	888639837
142	322	2	888640054
142	338	2	888640199
143	271	4	888407708
143	690	2	888407622
144	59	4	888105197
144	72	4	888105338
144	137	4	888104150
144	170	4	888105364
144	183	4	888105140
144	198	4	888105287
144	212	5	888105993
144	294	4	888103573
144	411	4	888104588
144	527	5	888105665
144	690	3	888103573
144	760	2	888104283
144	962	4	888105612
145	9	2	875270394
145	11	5	875273120
145	49	3	875272926
145	53	2	875272245
145	59	1	882181695
145	64	4	882181785
145	77	3	875272348
145	96	5	882181728
145	97	5	875272652
145	121	2	875270507
145	218	3	877343121
145	234	5	875271948
145	235	4	875270507
145	249	4	875270832
145	268	4	888396828
145	269	5	879161576
145	293	4	875270276
145	333	2	885557626
145	338	3	882181335
145	544	4	875271312
145	740	2	875272786
145	754	3	882181058
145	769	2	877343280
145	827	2	888398238
145	869	4	875272926
145	926	3	875271094
145	943	3	875272050
145	1011	5	888398162
145	1012	4	875270322
145	1279	1	875270903
146	286	3	891457493
146	294	1	891457668
146	311	4	891457714
146	342	1	891457978
147	286	5	885594040
147	302	4	885593845
148	127	1	877399351
148	164	4	877398444
148	173	5	877017054
148	194	5	877015066
149	311	3	883512752
149	333	1	883512591
150	14	4	878746889
150	291	4	878746764
151	28	4	879524199
151	73	4	879528909
151	124	5	879524491
151	135	5	879524471
151	143	5	879524878
151	173	5	879524130
151	190	4	879528673
151	202	5	879542753
151	301	4	879523925
151	380	5	879543146
151	491	4	879524536
151	498	5	879524150
151	531	3	879524738
151	559	2	879543075
151	610	5	879528607
151	664	5	879524713
151	705	5	879524778
151	836	4	879524514
151	922	4	879542847
151	966	4	879543457
151	1041	3	879543306
151	1050	4	879524879
152	319	2	890322385
152	401	3	884018905
152	451	5	882476911
152	559	1	882475972
152	568	5	882829846
152	660	5	880150075
152	944	4	882476632
152	1035	4	882477755
153	187	2	881371198
153	322	3	881370900
154	152	4	879138832
154	172	4	879138783
154	475	4	879138832
154	523	5	879138831
154	641	5	879138831
155	245	2	879371061
155	300	2	879370963
155	322	2	879371261
155	872	3	879370860
156	9	4	888185735
156	77	2	888185906
156	100	4	888185677
156	528	4	888185906
156	646	4	888185947
157	235	5	874813703
157	244	5	886890406
157	258	3	886890296
157	475	3	886890650
157	1016	5	886890341
158	4	4	880134477
158	7	5	880132744
158	70	4	880135118
158	83	5	880134913
158	125	3	880132745
158	195	5	880134398
158	230	2	880134445
158	285	5	880132383
158	290	4	880135160
158	294	1	880132193
158	298	3	880132513
158	431	5	880134477
158	514	3	880135093
158	709	5	880135020
158	1303	3	880134865
159	9	3	880485766
159	15	5	880485972
159	118	4	880557464
159	254	3	884026738
159	288	3	884026901
159	298	5	880557386
159	322	5	880485443
159	358	1	893255969
159	597	5	880989838
159	845	1	880557130
159	932	3	880557464
159	1012	5	880557080
159	1132	5	880557584
159	1152	4	880557464
159	1254	1	884360361
160	9	3	876767023
160	59	4	876858346
160	127	5	876770168
160	250	4	876768106
160	288	5	876771285
160	302	5	878078074
160	325	3	878078115
160	408	4	876767023
160	488	5	876862078
160	628	3	876767360
160	832	1	876770673
160	952	4	876767299
161	118	2	891172421
161	177	2	891171848
161	225	1	891172322
162	28	4	877636746
162	294	3	877634955
163	202	3	891220137
163	326	3	891219977
164	248	4	889402030
164	328	5	889401362
164	690	4	889401241
165	202	4	879525855
165	223	4	879525894
165	432	5	879526046
165	1119	3	879525922
167	86	4	892738212
167	137	5	892738081
167	184	1	892738278
167	216	4	892738237
167	465	5	892738341
167	641	4	892738341
167	674	2	892738384
167	1125	5	892738419
168	181	4	884287298
168	845	4	884287668
168	924	2	884287614
168	1028	2	884287846
168	1051	4	884288222
169	525	3	891359250
170	300	5	884103732
171	272	5	891034835
171	326	2	891034801
173	245	4	877556927
173	258	4	877556625
173	881	3	877557168
174	87	5	886514089
174	88	5	886513752
174	98	5	886452583
174	143	5	886515457
174	167	3	886514953
174	168	1	886434621
174	202	5	886513729
174	284	4	886433771
174	582	4	886439537
174	708	5	886514243
174	934	4	886434421
174	1017	2	886434187
174	1313	4	888155294
175	98	5	877107390
175	111	4	877108015
175	136	4	877108051
175	187	4	877107338
175	566	3	877108015
175	869	3	877107500
176	181	3	886047879
176	257	1	886048188
176	273	4	886048230
176	345	5	886046979
176	1097	4	886047963
177	42	4	880130972
177	98	5	880131026
177	144	5	880131011
177	156	5	880130931
177	160	4	880131011
177	187	4	880131040
177	204	3	880131011
177	210	4	880130990
177	221	3	880130775
177	238	3	880131143
178	69	5	882826437
178	111	4	882823905
178	118	4	882824291
178	133	4	885784518
178	173	5	882826306
178	174	5	882826719
178	203	4	882826242
178	220	3	882827247
178	223	4	882827433
178	232	5	882827162
178	268	4	884837324
178	269	4	882823324
178	295	3	882824055
178	328	3	882823416
178	339	3	892239822
178	531	4	882826242
178	823	2	882824592
178	873	3	886678647
178	881	2	886678484
178	1028	3	882824670
178	1119	4	882827400
179	271	1	892151565
179	313	4	892151270
179	347	3	892151064
180	40	4	877127296
180	181	2	877125956
180	235	4	877127758
180	356	3	877442079
180	655	5	877127159
180	735	4	877355337
181	107	1	878963343
181	120	1	878963204
181	237	5	878962996
181	245	2	878961369
181	273	1	878962774
181	280	4	878963381
181	281	2	878963038
181	287	2	878963038
181	299	1	878961749
181	370	2	878963418
181	544	1	878962919
181	815	3	878963168
181	826	1	878963304
181	880	1	878961668
181	1033	1	878963381
181	1079	1	878963122
181	1137	1	878962392
181	1215	1	878963304
181	1242	1	878962349
181	1276	1	878962586
181	1281	1	878963241
181	1287	1	878963380
181	1317	1	878962086
181	1325	1	878962816
181	1341	1	878962169
181	1352	1	878962240
181	1353	1	878962200
181	1358	1	878962120
181	1366	1	878962200
181	1368	1	878962200
181	1381	2	878962349
182	15	4	885612967
183	50	2	891467546
183	258	3	891462811
183	739	4	891467353
183	1215	1	891467546
184	95	4	889908801
184	192	4	889908843
184	197	4	889908873
184	212	4	889909618
184	274	4	889907812
184	372	3	889910053
184	480	4	889908571
184	509	4	889908694
184	629	3	889911162
184	676	4	889907925
184	735	3	889909868
184	837	3	889908630
184	1086	4	889907711
185	239	3	883524206
185	302	4	883526267
185	480	4	883526267
186	77	5	879023694
186	147	4	891719774
186	177	4	891719775
186	269	1	889818094
186	295	2	879023390
186	331	3	889817888
186	405	3	879023677
186	1385	2	879023968
187	204	2	879465370
187	694	5	879465532
187	710	4	879465242
187	1065	4	879465717
188	50	4	875072741
188	176	4	875072876
188	187	3	875072211
188	259	3	875071443
188	300	4	875071195
188	484	5	875072392
188	635	2	875074667
189	14	5	893263994
189	28	4	893266298
189	59	3	893265191
189	170	4	893265380
189	179	5	893265478
189	180	5	893265741
189	185	5	893265428
189	186	2	893266027
189	297	3	893264023
189	459	4	893264595
189	473	5	893264558
189	489	5	893265452
189	523	4	893265596
189	532	4	893264150
189	568	4	893266205
189	582	5	893265998
189	1154	3	893265380
190	9	1	891033725
190	24	3	891033773
190	237	5	891033773
190	288	5	891033606
190	826	3	891626040
190	930	2	891042916
192	9	5	881367527
192	111	2	881368222
192	118	2	881367932
192	287	4	881368016
193	159	4	889124191
193	282	5	889124965
193	333	1	889123039
193	347	4	889122906
193	405	3	889125945
193	487	5	889124287
193	690	4	889123221
193	1090	2	889124778
194	136	5	879521167
194	199	4	879521329
194	208	3	879521329
194	223	4	879547032
194	318	5	879521328
194	399	2	879528454
194	501	3	879548319
194	502	4	879548624
194	550	3	879524504
194	570	3	879529356
194	575	1	879554453
194	604	3	879546498
194	654	2	879522445
194	712	3	879555147
194	790	1	879535549
195	109	3	878019342
195	135	5	875771440
195	242	4	879141989
195	366	3	885110899
195	507	4	875436627
195	615	4	880650666
195	841	2	891841129
196	110	1	881252305
197	50	5	891409839
197	227	3	891409936
197	306	2	891409160
197	576	4	891410039
197	751	3	891409290
197	802	4	891410082
198	81	5	884208326
198	89	5	884208623
198	93	3	884205346
198	96	4	884208326
198	128	3	884209451
198	137	4	884205252
198	151	4	884206401
198	204	3	884207584
198	238	4	884207733
198	428	4	884209188
198	470	3	884208571
198	673	3	884209451
198	684	3	884208778
198	942	4	884209569
199	1354	1	883782952
200	22	4	884128372
200	139	3	884130540
200	239	3	884129602
200	447	4	884130014
200	465	4	884129112
200	523	4	884129627
200	934	2	884127370
200	1028	2	884128176
201	1	3	884113635
201	7	3	884112201
201	15	3	884140670
201	28	3	884111217
201	33	4	884112487
201	45	2	884111958
201	125	2	884140709
201	195	3	884111397
201	217	3	884112627
201	237	4	884140307
201	239	1	884140275
201	284	3	884140336
201	440	2	884114770
201	471	2	884140637
201	508	4	884140458
201	583	1	884112352
201	697	4	884140115
201	705	3	884113302
201	737	2	884112077
201	800	2	884114713
201	806	3	884140049
201	1103	3	884140487
201	1137	4	884111830
201	1166	3	884113806
201	1208	4	884140927
201	1355	1	884111637
202	96	4	879727059
202	179	1	879727294
203	458	3	880434336
203	628	4	880434810
203	744	2	880434495
203	748	2	880433474
204	9	5	892513979
204	12	4	892513865
204	269	4	892388976
204	333	1	892391748
205	294	3	888284402
206	326	1	888179713
206	336	1	888179928
206	1233	1	888180018
206	1433	1	888180049
207	18	2	877878739
207	45	3	878104569
207	129	3	877751037
207	173	3	877878923
207	177	3	891759050
207	238	2	876079087
207	792	2	876079016
207	805	3	882081278
207	1023	3	875506634
207	1170	2	875506807
208	393	4	883108398
208	781	3	883108498
209	129	2	883417667
209	276	2	883417796
209	293	4	883417796
210	28	4	887736175
210	114	4	887736175
210	132	4	887736206
210	173	4	887730264
210	651	4	887736140
211	117	4	879461498
211	215	5	879460294
211	890	2	879461395
213	42	5	878956263
213	70	3	878955766
213	98	5	878955598
213	125	5	878955295
213	157	4	878955501
213	194	4	878955766
213	195	5	878956156
213	212	4	878955474
213	288	4	878870226
213	924	4	878870846
213	1012	3	878870719
214	11	5	892668153
214	55	4	892668197
214	182	4	891544175
214	209	5	892668173
214	250	2	891543036
214	518	3	891544000
214	721	3	891635915
214	896	4	892668197
216	3	4	880233061
216	47	4	880244870
216	65	4	880233939
216	97	4	880235571
216	129	4	880232615
216	134	4	880233651
216	147	4	880232787
216	151	3	880232936
216	181	3	880232597
216	189	3	880244972
216	833	2	880233233
216	1067	5	881432392
217	11	4	889069741
217	405	3	889069878
217	684	5	889069782
217	808	2	889069808
217	825	3	889070266
218	98	5	881288233
218	164	3	881288574
218	288	2	877487931
218	431	3	881288386
218	657	5	881288265
219	433	5	889403133
221	38	2	875246506
221	117	4	875244633
221	144	4	875245427
221	288	3	875244232
221	399	3	875246459
221	423	2	875245167
221	550	4	875246183
221	633	3	875246459
221	737	4	875393346
221	751	4	885081300
221	931	3	875245100
221	1016	3	875244713
221	1208	3	875247565
222	64	5	878183136
222	98	4	878181387
222	133	1	878182338
222	162	2	878184087
222	223	4	878181535
222	230	4	878182058
222	241	3	878181696
222	245	3	878181198
222	333	5	877562819
222	380	4	878184545
222	405	3	877563570
222	410	2	877563326
222	431	4	881059461
222	465	2	878183898
222	472	2	877563998
222	566	4	878185044
222	597	1	877564076
222	628	5	877563485
222	685	4	881061165
222	762	3	877563530
222	790	1	878185068
222	1145	3	878185137
222	1206	2	878184899
222	1250	1	881060635
222	1291	2	877564031
223	28	4	891550684
223	121	3	891549294
223	173	5	891550711
223	278	4	891549901
223	477	3	891550144
223	546	5	891550118
223	819	3	891550404
223	1234	3	891548646
224	107	3	888104522
224	126	3	888103704
224	147	3	888103646
224	237	3	888082742
224	378	4	888103775
224	402	5	888103872
224	526	4	888082495
224	544	1	888103812
224	570	4	888104522
224	729	3	888104188
224	731	4	888103872
224	924	3	888103646
225	98	5	879539672
225	478	5	879539767
225	479	4	879539614
226	12	5	883889322
226	23	3	883889355
226	92	2	883889102
226	179	4	883888853
226	474	3	883889063
226	596	3	883889884
227	15	4	879035725
227	287	4	879035704
227	319	4	879035072
227	756	3	879035658
228	56	2	889388607
228	275	3	889388521
229	882	4	891633029
230	10	3	880485530
230	64	5	880484416
230	69	4	880484338
230	143	5	880484501
230	195	3	880484416
230	203	2	880484890
230	422	3	880485633
230	423	5	880484825
230	499	4	880484870
230	549	5	880485380
230	627	5	880484661
230	699	4	880484975
231	15	4	879965704
232	44	4	888549412
232	172	4	888549412
232	196	5	888549757
232	268	4	885939544
232	286	3	880062259
232	357	4	888549721
232	425	4	888549790
232	435	4	888550013
232	475	5	880062469
232	744	3	880062645
233	4	3	877663337
233	9	5	876021262
233	64	5	880612285
233	135	4	877661881
233	180	5	877661364
233	215	5	877665324
233	304	5	877665323
233	462	5	879147730
233	660	5	877661634
233	845	4	880190627
234	2	2	892335142
234	86	2	892333765
234	93	3	891227771
234	127	4	892078386
234	144	3	892079840
234	162	3	892335541
234	165	5	892079040
234	176	3	892079190
234	190	3	892079190
234	200	5	892335074
234	258	2	891033627
234	280	3	892334803
234	304	3	891033591
234	371	3	892335850
234	385	2	892335309
234	447	3	892336047
234	494	4	892078837
234	503	2	892333653
234	615	5	892079722
234	623	2	892318107
234	631	3	892334577
234	635	2	892336358
234	655	3	892333616
234	656	4	892079288
234	659	3	892078660
234	662	3	892079585
234	699	3	892079538
234	768	2	892335990
234	792	4	892336165
234	835	3	892334481
234	843	2	892334400
234	984	2	891033966
234	1003	2	892334267
234	1010	2	892335415
234	1120	3	892079288
234	1185	3	892335951
234	1448	3	892335187
234	1449	4	892333573
234	1460	3	892335460
235	96	4	889654971
235	285	4	889655204
235	970	4	889655204
235	1134	4	889655723
236	282	5	890117028
236	304	4	890117676
236	333	3	890117748
236	411	1	890117095
236	520	4	890116095
236	521	3	890115996
236	595	3	890117267
236	717	3	890117409
237	64	5	879376671
237	286	3	879376220
238	151	2	883576398
238	237	3	883576281
238	255	3	883576644
239	14	5	889179478
239	39	5	889181093
239	179	5	889180410
239	186	1	889179253
239	203	1	889179291
239	269	5	889181247
239	382	3	889180578
239	433	5	889180447
239	509	5	889180071
239	528	5	889178562
239	1065	5	889181015
240	286	5	885775625
240	302	5	885775536
241	286	5	887249482
242	275	5	879741196
242	1355	5	879741196
243	8	5	879989217
243	77	3	879988587
243	246	4	879987085
243	306	4	879988830
244	28	4	880606300
244	56	5	880602440
244	65	4	880605766
244	67	4	880608820
244	88	4	880607684
244	121	1	880604583
244	188	4	880605869
244	193	4	880605638
244	291	2	880604379
244	383	3	880608957
244	455	2	880604503
244	650	3	880607231
244	735	5	880605697
244	744	3	880606923
244	924	4	880604550
244	1012	2	880604670
244	1428	4	880603411
245	717	4	888513447
246	56	1	884920948
246	66	3	884922252
246	111	3	884921861
246	158	1	884923955
246	159	3	884923003
246	164	3	884921613
246	175	4	884921362
246	226	2	884923329
246	240	3	884923547
246	384	2	884923632
246	433	5	884921488
246	477	4	884921767
246	597	2	884921965
246	658	4	884923329
246	735	4	884921679
246	739	2	884922678
246	765	2	884924026
247	100	3	893081395
247	181	4	893081396
247	258	5	893097024
248	187	3	884535046
248	323	1	884534472
248	343	4	884534436
249	93	4	879640194
249	123	3	879640261
249	129	5	879571883
249	147	5	879640343
249	427	5	879572472
249	658	4	879572944
249	844	5	879572795
249	1167	4	879572284
250	81	4	878092143
250	144	4	878092059
250	159	4	878092144
250	202	4	878090253
250	259	1	883262792
250	276	4	878089436
250	323	2	878089100
250	469	4	878091772
250	588	5	878091736
250	629	4	878091965
250	984	3	878089229
250	991	2	878089202
251	25	4	886272615
251	185	5	886271884
251	202	4	886271920
251	294	3	886272283
251	480	5	886271733
251	597	3	886272514
252	124	5	891457490
253	4	4	891628670
253	200	4	891628392
253	318	5	891628323
253	518	5	891628392
253	751	3	891627815
253	966	5	891628181
254	112	2	886473631
254	135	5	886471880
254	143	4	886472643
254	163	2	886472023
254	200	3	886472504
254	228	4	886472609
254	241	4	886473190
254	405	3	886471522
254	526	3	886472609
254	842	3	886475952
255	219	5	883216544
255	826	1	883216958
256	21	4	882163677
256	100	4	882150313
256	187	3	882164444
256	230	4	882164480
256	274	5	882151456
256	449	3	882164999
256	597	4	882152509
256	829	4	882153751
256	930	3	882153258
256	934	3	882163730
256	984	3	882150192
256	989	5	882150192
257	86	4	879547655
257	285	5	882049950
257	936	4	882050151
257	1010	4	882050150
257	1137	5	882049896
258	300	5	885700877
258	326	5	885701024
259	168	5	876365003
259	173	4	874724843
259	286	4	874724727
259	546	3	883372151
259	748	4	883371839
259	928	4	874724937
260	307	3	890618295
261	300	5	890454310
261	596	2	890456142
262	70	4	879962517
262	82	3	879794918
262	204	3	879793667
262	216	3	879793216
262	219	3	879794206
262	234	3	879794359
262	269	3	879961283
262	655	4	879793938
262	699	5	879793022
262	747	4	879793641
263	141	5	891299877
263	181	4	891299448
263	378	5	891299630
264	173	5	886123358
264	209	5	886123415
264	234	4	886122261
264	275	5	886122706
264	430	5	886123531
264	517	5	886123358
265	1	5	875320247
265	273	5	875320714
265	294	4	875320052
265	975	4	875320601
265	1016	3	875320462
266	9	4	892258004
266	100	5	892257865
266	276	3	892258004
266	289	3	892256967
266	325	1	892257419
266	924	2	892258038
267	2	3	878972463
267	5	3	878972399
267	12	5	878971659
267	68	4	878972931
267	77	3	878972650
267	89	5	878971690
267	135	5	878972463
267	161	4	878972706
267	181	5	878974783
267	183	4	878971438
267	188	5	878971745
267	195	4	878972092
267	210	4	878972434
267	265	5	878972903
267	431	4	878973426
267	576	3	878973760
267	710	4	878972493
267	959	3	878972524
267	1035	4	878973971
267	1240	5	878974783
268	29	1	875744356
268	116	4	875306760
268	185	3	875309801
268	239	3	875310491
268	363	1	875744228
268	380	2	875310704
268	388	1	875743979
268	408	5	875742316
268	435	4	875309859
268	449	2	875744357
268	450	1	875745536
268	456	2	875743012
268	719	1	875744021
268	747	3	875310412
268	840	2	875744357
268	1016	3	875742470
268	1110	3	876514077
269	11	3	891448365
269	108	5	891457067
269	124	5	891446165
269	167	1	891451648
269	237	2	891446368
269	268	5	891446132
269	371	5	891450880
269	378	3	891449962
269	479	4	891448980
269	515	4	891446132
269	603	5	891448871
269	673	4	891448322
269	697	4	891447931
269	708	4	891448323
269	710	1	891449843
269	739	1	891451431
269	747	4	891449646
269	806	3	891448019
269	823	3	891446514
269	825	1	891456033
269	940	1	891451908
269	1005	4	891447427
269	1267	1	891448643
269	1361	4	891446756
269	1478	1	891448643
270	56	5	876955976
270	118	3	876956038
270	242	5	876953744
270	265	4	876956137
270	283	5	876954456
270	554	1	876956264
270	563	3	876956442
[truncated: 18,000 more rows]
