# Supplementary material
Source: ML conference proceedings conference paper supplement (https://proceedings.neurips.cc/paper_files/paper/2022/hash/01ecd39ca49ddecc5729ca996304781b-Abstract.html)
Supplement: Supplementary file 1 [file 01ecd39ca49ddecc5729ca996304781b-Supplemental-Conference.zip › supplementary NEURIPS 2022/CODE_supplementary/data/ml-100k/ua.test]

1	20	4	887431883
1	33	4	878542699
1	61	4	878542420
1	117	3	874965739
1	155	2	878542201
1	160	4	875072547
1	171	5	889751711
1	189	3	888732928
1	202	5	875072442
1	265	4	878542441
2	13	4	888551922
2	50	5	888552084
2	251	5	888552084
2	280	3	888551441
2	281	3	888980240
2	290	3	888551441
2	292	4	888550774
2	297	4	888550871
2	312	3	888550631
2	314	1	888980085
3	245	1	889237247
3	294	2	889237224
3	323	2	889237269
3	328	5	889237455
3	331	4	889237455
3	332	1	889237224
3	334	3	889237122
3	335	1	889237269
3	337	1	889236983
3	343	3	889237122
4	50	5	892003526
4	260	4	892004275
4	264	3	892004275
4	288	4	892001445
4	294	5	892004409
4	303	5	892002352
4	354	5	892002353
4	356	3	892003459
4	357	4	892003525
4	361	5	892002353
5	1	4	875635748
5	2	3	875636053
5	17	4	875636198
5	98	3	875720691
5	110	1	875636493
5	225	2	875635723
5	363	3	875635225
5	424	1	875635807
5	439	1	878844423
5	454	1	875721432
6	14	5	883599249
6	23	4	883601365
6	69	3	883601277
6	86	3	883603013
6	98	5	883600680
6	258	2	883268278
6	301	2	883600406
6	463	4	883601713
6	492	5	883601089
6	517	4	883602212
7	32	4	891350932
7	163	4	891353444
7	382	4	891352093
7	430	3	891352178
7	455	4	891353086
7	479	4	891352010
7	492	5	891352010
7	497	4	891352134
7	648	5	891351653
7	661	5	891351624
8	22	5	879362183
8	50	5	879362124
8	79	4	879362286
8	89	4	879362124
8	182	5	879362183
8	294	3	879361521
8	338	4	879361873
8	385	1	879362124
8	457	1	879361825
8	550	3	879362356
9	6	5	886960055
9	286	5	886960055
9	298	5	886960055
9	340	4	886958715
9	479	4	886959343
9	487	5	886960056
9	507	4	886959343
9	521	4	886959343
9	527	3	886959344
9	691	5	886960055
10	7	4	877892210
10	16	4	877888877
10	100	5	877891747
10	175	3	877888677
10	285	5	877889186
10	461	3	877888944
10	486	4	877886846
10	488	5	877888613
10	504	5	877892110
10	611	5	877886722
11	38	3	891905936
11	110	3	891905324
11	111	4	891903862
11	227	3	891905896
11	425	4	891904300
11	558	3	891904214
11	723	5	891904637
11	725	3	891905568
11	732	3	891904596
11	740	4	891903067
12	82	4	879959610
12	96	4	879959583
12	97	5	879960826
12	132	5	879959465
12	143	5	879959635
12	172	4	879959088
12	204	5	879960826
12	300	4	879958639
12	471	5	879959670
12	735	5	879960826
13	56	5	881515011
13	98	4	881515011
13	186	4	890704999
13	198	3	881515193
13	215	5	882140588
13	272	4	884538403
13	344	2	888073635
13	360	4	882140926
13	526	3	882141053
13	836	2	882139746
14	22	3	890881521
14	98	3	890881335
14	111	3	876965165
14	174	5	890881294
14	213	5	890881557
14	269	4	892242403
14	357	2	890881294
14	474	4	890881557
14	530	5	890881433
14	709	5	879119693
15	25	3	879456204
15	127	2	879455505
15	222	3	879455730
15	331	3	879455166
15	405	2	879455957
15	473	1	879456204
15	678	1	879455311
15	685	4	879456288
15	749	1	879455311
15	932	1	879456465
16	8	5	877722736
16	55	5	877717956
16	64	5	877720297
16	89	2	877717833
16	178	5	877719333
16	194	5	877720733
16	197	5	877726146
16	209	5	877722736
16	705	5	877722736
16	944	1	877727122
17	1	4	885272579
17	9	3	885272558
17	13	3	885272654
17	117	3	885272724
17	125	1	885272538
17	151	4	885272751
17	237	2	885272628
17	245	2	885166209
17	508	3	885272779
17	744	3	885272606
18	26	4	880129731
18	86	4	880129731
18	113	5	880129628
18	182	4	880130640
18	202	3	880130515
18	408	5	880129628
18	443	3	880130193
18	496	5	880130470
18	729	3	880131236
18	950	3	880130764
19	4	4	885412840
19	153	4	885412840
19	201	3	885412839
19	258	4	885411840
19	310	4	885412063
19	313	2	885411792
19	382	3	885412840
19	435	5	885412840
19	655	3	885412723
19	692	3	885412840
20	11	2	879669401
20	118	4	879668442
20	172	3	879669181
20	176	2	879669152
20	186	3	879669040
20	194	3	879669152
20	208	2	879669401
20	288	1	879667584
20	405	3	879668555
20	678	4	879667684
21	103	1	874951245
21	129	4	874951382
21	164	5	874951695
21	222	2	874951382
21	324	4	874950889
21	370	1	874951293
21	440	1	874951798
21	447	5	874951695
21	558	5	874951695
21	948	1	874951054
22	79	4	878887765
22	80	4	878887227
22	128	5	878887983
22	241	3	878888025
22	258	5	878886261
22	376	3	878887112
22	377	1	878887116
22	510	5	878887765
22	511	4	878887983
22	791	1	878887227
23	170	4	874785348
23	172	4	874785889
23	196	2	874786926
23	258	5	876785704
23	323	2	874784266
23	381	4	874787350
23	385	4	874786462
23	404	4	874787860
23	463	4	874785843
23	1006	3	874785809
24	64	5	875322758
24	129	3	875246185
24	153	4	875323368
24	191	5	875323003
24	367	2	875323241
24	372	4	875323553
24	427	5	875323002
24	662	5	875323440
24	742	4	875323915
24	763	5	875322875
25	25	5	885853415
25	181	5	885853415
25	208	4	885852337
25	222	4	885852817
25	228	4	885852920
25	257	4	885853415
25	258	5	885853199
25	357	4	885852757
25	501	3	885852301
25	615	5	885852611
26	15	4	891386369
26	25	3	891373727
26	125	4	891371676
26	235	2	891372429
26	258	3	891347949
26	455	3	891371506
26	685	3	891371676
26	930	2	891385985
26	1015	3	891352136
26	1016	3	891377609
27	121	4	891543191
27	246	4	891542897
27	281	3	891543164
27	298	4	891543164
27	370	4	891543245
27	475	2	891542942
27	596	2	891542987
27	742	3	891543129
27	925	3	891543245
27	978	2	891543222
28	7	5	881961531
28	79	4	881961003
28	95	3	881956917
28	98	5	881961531
28	173	3	881956220
28	201	3	881961671
28	209	4	881961214
28	217	3	881961671
28	234	4	881956144
28	380	4	881961394
29	98	4	882821942
29	189	4	882821942
29	245	3	882820803
29	332	4	882820869
29	358	2	882821044
29	539	2	882821044
29	678	3	882821582
29	689	2	882821705
29	748	2	882821558
29	1018	4	882821989
30	82	4	875060217
30	181	4	875060217
30	255	4	875059984
30	286	5	885941156
30	289	2	876847817
30	435	5	885941156
30	539	3	885941454
30	678	2	885942002
30	688	3	885941492
30	1007	5	885941156
31	135	4	881548030
31	302	4	881547719
31	321	4	881547746
31	484	5	881548030
31	493	5	881548110
31	498	4	881548111
31	504	5	881548110
31	682	2	881547834
31	705	5	881548110
31	886	2	881547877
32	117	3	883717555
32	151	3	883717850
32	246	4	883717521
32	249	4	883717645
32	250	4	883717684
32	276	4	883717913
32	290	3	883717913
32	294	3	883709863
32	591	3	883717581
32	1012	4	883717581
33	258	4	891964066
33	292	4	891964244
33	307	3	891964148
33	313	5	891963290
33	328	4	891964187
33	333	4	891964259
33	343	4	891964344
33	751	4	891964188
33	872	3	891964230
33	895	3	891964187
34	242	5	888601628
34	245	4	888602923
34	259	2	888602808
34	286	5	888602513
34	299	5	888602923
34	310	4	888601628
34	312	4	888602742
34	329	5	888602808
34	332	5	888602742
34	690	4	888602513
35	242	2	875459166
35	243	2	875459046
35	259	4	875459017
35	261	3	875459046
35	322	3	875459017
35	332	4	875459237
35	680	4	875459099
35	877	2	875459099
35	881	2	875459127
35	1025	3	875459237
36	268	2	882157418
36	269	3	882157258
36	307	4	882157227
36	319	2	882157356
36	339	5	882157581
36	682	1	882157386
36	748	4	882157285
36	882	5	882157581
36	883	5	882157581
36	885	5	882157581
37	55	3	880915942
37	56	5	880915810
37	79	4	880915810
37	117	4	880915674
37	183	4	880930042
37	222	3	880915528
37	288	4	880915258
37	403	5	880915942
37	540	2	880916070
37	685	3	880915528
38	95	5	892430094
38	139	2	892432786
38	153	5	892430369
38	161	5	892432062
38	328	4	892428688
38	432	1	892430282
38	465	5	892432476
38	573	1	892433660
38	679	5	892432062
38	758	1	892434626
39	258	4	891400280
39	300	3	891400280
39	306	3	891400342
39	313	4	891400159
39	315	4	891400094
39	333	4	891400214
39	345	3	891400159
39	347	4	891400704
39	352	5	891400704
39	900	3	891400159
40	243	2	889041694
40	258	3	889041981
40	268	4	889041430
40	271	2	889041523
40	303	4	889041283
40	333	4	889041402
40	340	2	889041454
40	345	4	889041670
40	754	4	889041790
40	880	3	889041643
41	28	4	890687353
41	31	3	890687473
41	98	4	890687374
41	170	4	890687713
41	265	3	890687042
41	313	3	890685449
41	435	3	890687550
41	486	4	890687305
41	746	3	890687019
41	751	4	890686872
42	44	3	881108548
42	96	5	881107178
42	274	5	881105817
42	403	3	881108684
42	423	5	881107687
42	546	3	881105817
42	588	5	881108147
42	625	3	881108873
42	794	3	881108425
42	1028	4	881106072
43	5	4	875981421
43	14	2	883955745
43	40	3	883956468
43	120	4	884029430
43	137	4	875975656
43	151	4	875975613
43	203	4	883955224
43	204	4	883956122
43	323	3	875975110
43	815	4	883956189
44	15	4	878341343
44	195	5	878347874
44	240	4	878346997
44	258	4	878340824
44	294	4	883612356
44	443	5	878348289
44	449	5	883613334
44	507	3	878347392
44	644	3	878347818
44	660	5	878347915
45	25	4	881014015
45	109	5	881012356
45	118	4	881014550
45	121	4	881013563
45	127	5	881007272
45	472	3	881014417
45	473	3	881014417
45	476	3	881015729
45	763	2	881013563
45	1061	2	881016056
46	127	5	883616133
46	151	4	883616218
46	181	4	883616254
46	288	2	883611307
46	307	3	883611430
46	313	5	883611274
46	328	4	883611430
46	333	5	883611374
46	690	5	883611274
46	1062	5	883614766
47	268	4	879439040
47	292	4	879438984
47	302	5	879439040
47	306	4	879439113
47	321	4	879439040
47	323	2	879440360
47	324	3	879439078
47	340	5	879439078
47	683	3	879439143
47	995	3	879440429
48	174	5	879434723
48	210	3	879434886
48	259	4	879434270
48	308	5	879434292
48	309	3	879434132
48	603	4	879434607
48	609	4	879434819
48	661	5	879434954
48	680	3	879434330
48	690	4	879434211
49	47	5	888068715
49	68	1	888069513
49	302	4	888065432
49	547	5	888066187
49	559	2	888067405
49	581	3	888068143
49	625	3	888067031
49	959	2	888068912
49	995	3	888065577
49	1003	2	888068651
50	9	4	877052297
50	123	4	877052958
50	125	2	877052502
50	246	3	877052329
50	253	5	877052550
50	286	2	877052400
50	325	1	877052400
50	475	5	877052167
50	823	3	877052784
50	1084	5	877052501
51	64	4	883498936
51	83	5	883498937
51	132	4	883498655
51	148	3	883498623
51	182	3	883498790
51	203	4	883498685
51	485	1	883498790
51	496	4	883498655
51	603	3	883498728
51	679	3	883498937
52	95	4	882922927
52	116	4	882922328
52	250	3	882922661
52	257	3	882922806
52	280	3	882922806
52	405	4	882922610
52	498	5	882922948
52	748	4	882922629
52	1009	5	882922328
52	1086	4	882922562
53	24	3	879442538
53	100	5	879442537
53	174	5	879442561
53	181	4	879443046
53	199	5	879442384
53	228	3	879442561
53	250	2	879442920
53	281	4	879443288
53	845	3	879443083
53	924	3	879443303
54	106	3	880937882
54	268	5	883963510
54	298	4	892681300
54	302	4	880928519
54	313	4	890608360
54	595	3	880937813
54	676	5	880935294
54	685	3	880935504
54	742	5	880934806
54	820	3	880937992
55	56	4	878176397
55	89	5	878176398
55	144	5	878176398
55	254	2	878176206
55	257	3	878176084
55	405	1	878176134
55	678	3	878176206
55	685	1	878176134
55	1016	1	878176005
55	1089	1	878176134
56	71	4	892683275
56	91	4	892683275
56	121	5	892679480
56	222	5	892679439
56	447	4	892679067
56	449	5	892679308
56	546	3	892679460
56	755	3	892910207
56	869	3	892683895
56	1047	4	892911290
57	28	4	883698324
57	79	5	883698495
57	204	4	883698272
57	243	3	883696547
57	304	5	883698581
57	419	3	883698454
57	682	3	883696824
57	756	3	883697730
57	760	2	883697617
57	1047	4	883697679
58	9	4	884304328
58	100	5	884304553
58	109	4	884304396
58	144	4	884304936
58	173	5	884305353
58	214	2	884305296
58	268	5	884304288
58	709	5	884304812
58	1098	4	884304936
58	1099	2	892243079
59	23	5	888205300
59	92	5	888204997
59	196	5	888205088
59	235	1	888203658
59	323	4	888206809
59	468	3	888205855
59	485	2	888204466
59	715	5	888205921
59	742	3	888203053
59	951	3	888206409
60	60	5	883327734
60	162	4	883327734
60	208	5	883326028
60	222	4	883327441
60	403	3	883327087
60	427	5	883326620
60	430	5	883326122
60	525	5	883325944
60	604	4	883327997
60	1021	5	883326185
61	243	2	892331237
61	304	4	891220884
61	323	3	891206450
61	328	5	891206371
61	331	2	891206126
61	342	2	892302309
61	347	5	892302120
61	678	3	892302309
61	690	2	891206407
61	1127	4	891206274
62	12	4	879373613
62	21	3	879373460
62	65	4	879374686
62	68	1	879374969
62	257	2	879372434
62	382	3	879375537
62	498	4	879373848
62	665	2	879376483
62	712	4	879376178
62	1016	4	879373008
63	20	3	875748004
63	50	4	875747292
63	100	5	875747319
63	242	3	875747190
63	277	4	875747401
63	289	2	875746985
63	762	3	875747688
63	1007	5	875747368
63	1028	3	875748198
63	1067	3	875747514
64	160	4	889739288
64	176	4	889737567
64	381	4	879365491
64	392	3	889737542
64	433	2	889740286
64	516	5	889737376
64	684	4	889740199
64	736	4	889739212
64	778	5	889739806
64	1063	3	889739539
65	47	2	879216672
65	56	3	879217816
65	97	5	879216605
65	100	3	879217558
65	125	4	879217509
65	196	5	879216637
65	202	4	879217852
65	676	5	879217689
65	806	4	879216529
65	1142	4	879217349
66	1	3	883601324
66	7	3	883601355
66	117	3	883601787
66	181	5	883601425
66	249	4	883602158
66	258	4	883601089
66	298	4	883601324
66	471	5	883601296
66	597	3	883601456
66	877	1	883601089
67	1	3	875379445
67	64	5	875379211
67	121	4	875379683
67	147	3	875379357
67	151	4	875379619
67	240	5	875379566
67	405	5	875379794
67	743	4	875379445
67	1093	5	875379419
67	1095	4	875379287
68	7	3	876974096
68	117	4	876973939
68	118	2	876974248
68	178	5	876974755
68	237	5	876974133
68	245	3	876973777
68	405	3	876974518
68	411	1	876974596
68	742	1	876974198
68	1047	1	876974379
69	12	5	882145567
69	56	5	882145428
69	174	5	882145548
69	175	3	882145586
69	240	3	882126156
69	256	5	882126156
69	258	4	882027204
69	268	5	882027109
69	300	3	882027204
69	427	3	882145465
70	50	4	884064188
70	82	4	884068075
70	210	4	884065854
70	217	4	884151119
70	399	4	884068521
70	419	5	884065035
70	431	3	884150257
70	584	3	884150236
70	746	3	884150257
70	1133	3	884151344
71	56	5	885016930
71	89	5	880864462
71	134	3	885016614
71	222	3	877319375
71	276	4	877319375
71	285	3	877319414
71	346	4	885016248
71	462	5	877319567
71	475	5	877319330
71	923	5	885016882
72	48	4	880036718
72	54	3	880036854
72	182	5	880036515
72	195	5	880037702
72	234	4	880037418
72	568	4	880037203
72	679	2	880037164
72	699	3	880036783
72	866	4	880035887
72	1110	3	880037334
73	12	5	888624976
73	56	4	888626041
73	94	1	888625754
73	127	5	888625200
73	206	3	888625754
73	357	5	888626007
73	475	4	888625753
73	480	4	888625753
73	588	2	888625754
73	657	5	888625422
74	9	4	888333458
74	15	4	888333542
74	100	4	888333428
74	126	3	888333428
74	237	4	888333428
74	272	5	888333194
74	285	3	888333428
74	288	3	888333280
74	326	4	888333329
74	1084	3	888333542
75	121	4	884050450
75	147	3	884050134
75	237	2	884050309
75	240	1	884050661
75	284	2	884050393
75	409	3	884050829
75	476	1	884050393
75	496	5	884051921
75	546	3	884050422
75	1017	5	884050502
76	61	4	875028123
76	92	4	882606108
76	100	5	875028391
76	135	5	875028792
76	175	4	875028853
76	276	5	875027601
76	531	4	875028007
76	582	3	882607444
76	811	4	882606323
76	1129	5	875028075
77	23	4	884753173
77	91	3	884752924
77	125	3	884733014
77	168	4	884752721
77	172	3	884752562
77	195	5	884733695
77	238	5	884733965
77	474	5	884732407
77	484	5	884733766
77	518	4	884753202
78	255	4	879633745
78	257	4	879633721
78	269	3	879633467
78	289	4	879633567
78	298	3	879633702
78	301	5	879633467
78	323	1	879633567
78	412	4	879634223
78	1047	1	879634199
78	1160	5	879634134
79	50	4	891271545
79	100	5	891271652
79	124	5	891271870
79	246	5	891271545
79	269	5	891271792
79	288	3	891272015
79	303	4	891271203
79	508	3	891271676
79	937	2	891271180
79	1161	2	891271697
80	45	4	887401585
80	50	3	887401533
80	58	4	887401677
80	87	4	887401307
80	194	3	887401763
80	269	3	883605009
80	423	3	887401643
80	466	5	887401701
80	582	3	887401701
80	886	4	883605238
81	3	4	876592546
81	169	4	876534751
81	273	4	876533710
81	280	4	876534214
81	411	2	876534244
81	432	2	876535131
81	471	3	876533586
81	476	2	876534124
81	742	2	876533764
81	824	3	876534437
82	56	3	878769410
82	135	3	878769629
82	183	3	878769848
82	194	4	878770027
82	477	3	876311344
82	508	2	884714249
82	597	3	878768882
82	717	1	884714492
82	756	1	878768741
82	1134	2	884714402
83	78	2	880309089
83	97	4	880308690
83	210	5	880307751
83	215	4	880307940
83	234	4	887665548
83	281	5	880307072
83	385	4	887665549
83	576	4	880308755
83	623	4	880308578
83	660	4	880308256
84	12	5	883452874
84	121	4	883452307
84	289	5	883449419
84	322	3	883449567
84	405	3	883452363
84	528	5	883453617
84	529	5	883453108
84	742	3	883450643
84	748	4	883449530
84	1033	4	883452711
85	25	2	879452769
85	51	2	879454782
85	228	3	882813248
85	259	2	881705026
85	427	3	879456350
85	433	3	879828720
85	507	4	879456199
85	588	3	880838306
85	642	4	882995615
85	1065	3	879455021
86	258	5	879570366
86	286	3	879569555
86	300	3	879570277
86	319	3	879569555
86	327	4	879570218
86	872	3	879570366
86	879	2	879570149
86	881	2	879570218
86	889	5	879570973
86	1175	5	879570973
87	40	3	879876917
87	82	5	879875774
87	210	5	879875734
87	274	4	879876734
87	367	4	879876702
87	384	4	879877127
87	401	2	879876813
87	554	4	879875940
87	585	4	879877008
87	1016	4	879876194
88	261	5	891038103
88	301	4	891037618
88	302	3	891037111
88	315	4	891037276
88	321	1	891037708
88	690	4	891037708
88	750	2	891037276
88	881	5	891038103
88	886	5	891038103
88	904	5	891037276
89	117	5	879441357
89	127	5	879441335
89	197	5	879459859
89	216	5	879459859
89	221	1	879441687
89	246	5	879461219
89	381	4	879459999
89	732	5	879459909
89	936	5	879461219
89	1048	3	879460027
90	25	5	891384789
90	98	5	891383204
90	259	2	891382392
90	289	3	891382310
90	347	4	891383319
90	382	5	891383835
90	648	4	891384754
90	900	4	891382309
90	1086	4	891384424
90	1198	5	891383866
91	28	4	891439243
91	172	4	891439208
91	193	3	891439057
91	264	4	891438583
91	323	2	891438397
91	423	5	891439090
91	427	4	891439057
91	480	4	891438875
91	507	4	891438977
91	683	3	891438351
92	77	3	875654637
92	168	4	875653723
92	172	4	875653271
92	229	3	875656201
92	501	2	875653665
92	587	3	875660408
92	739	2	876175582
92	794	3	875654798
92	1049	1	890251826
92	1079	3	886443455
93	15	5	888705388
93	222	4	888705295
93	235	4	888705939
93	275	4	888705224
93	412	2	888706037
93	476	4	888705879
93	477	5	888705053
93	815	4	888705761
93	820	3	888705966
93	845	4	888705321
94	62	3	891722933
94	184	2	891720862
94	265	4	891721889
94	343	4	891725009
94	720	1	891723593
94	744	4	891721462
94	789	4	891720887
94	1217	3	891723086
94	1220	3	891722678
94	1224	3	891722802
95	1	5	879197329
95	68	4	879196231
95	135	3	879197562
95	172	4	879196847
95	233	4	879196354
95	527	4	888954440
95	546	2	879196566
95	625	4	888954412
95	787	2	888954930
95	1217	3	880572658
96	8	5	884403020
96	87	4	884403531
96	91	5	884403250
96	153	4	884403624
96	156	4	884402860
96	479	4	884403758
96	484	5	884402860
96	519	4	884402896
96	645	5	884403020
96	673	4	884402860
97	50	5	884239471
97	89	5	884238939
97	98	4	884238728
97	115	5	884239525
97	194	3	884238860
97	222	5	884238887
97	228	5	884238860
97	482	5	884238693
97	484	3	884238966
97	670	5	884239744
98	47	4	880498898
98	70	3	880499018
98	116	5	880499053
98	163	3	880499053
98	209	2	880498935
98	321	3	880498519
98	517	5	880498990
98	655	3	880498861
98	745	3	880498935
98	938	3	880498624
99	4	5	886519097
99	50	5	885679998
99	79	4	885680138
99	111	1	885678886
99	246	3	888469392
99	268	3	885678247
99	274	1	885679157
99	403	4	885680374
99	873	1	885678436
99	1016	5	885678724
100	266	2	891375484
100	268	3	891374982
100	288	2	891374603
100	302	4	891374528
100	321	1	891375112
100	340	3	891374707
100	344	4	891374868
100	354	2	891375260
100	355	4	891375313
100	750	4	891375016
101	222	3	877136243
101	252	3	877136628
101	281	2	877136842
101	282	3	877135883
101	304	3	877135677
101	369	2	877136928
101	405	4	877137015
101	471	3	877136535
101	596	3	877136564
101	829	3	877136138
102	70	3	888803537
102	161	2	888801876
102	322	3	883277645
102	405	2	888801812
102	448	3	888803002
102	515	1	888801316
102	524	3	888803537
102	625	3	883748418
102	768	2	883748450
102	823	3	888801465
103	24	4	880415847
103	50	5	880416864
103	117	4	880416313
103	121	3	880415766
103	126	5	880420002
103	127	4	880416331
103	144	4	880420510
103	222	3	880415875
103	300	3	880416727
103	527	5	880416238
104	117	2	888465972
104	285	4	888465201
104	287	2	888465347
104	299	3	888442436
104	300	3	888442275
104	301	2	888442275
104	756	2	888465739
104	984	1	888442575
104	1010	1	888465554
104	1016	1	888466002
105	258	5	889214306
105	268	4	889214268
105	270	5	889214245
105	272	4	889214284
105	286	4	889214306
105	288	4	889214335
105	307	2	889214381
105	324	4	889214245
105	333	3	889214268
105	752	3	889214406
106	107	4	883876961
106	213	4	881453065
106	435	3	881452355
106	526	4	881452685
106	582	4	881451199
106	660	4	881451631
106	692	3	881453290
106	703	4	881450039
106	778	4	881453040
106	828	2	883876872
107	258	4	891264466
107	268	4	891264387
107	269	5	891264267
107	271	2	891264432
107	300	1	891264432
107	302	4	891264296
107	305	4	891264327
107	321	2	891264432
107	333	3	891264267
107	340	5	891264356
108	13	3	879879834
108	50	4	879879739
108	100	4	879879720
108	121	3	879880190
108	125	3	879879864
108	181	3	879879985
108	237	3	879879796
108	275	5	879879739
108	282	3	879880055
108	290	4	879880076
109	1	4	880563619
109	8	3	880572642
109	97	3	880578711
109	127	2	880563471
109	178	3	880572950
109	402	4	880581344
109	475	1	880563641
109	566	4	880578814
109	631	3	880579371
109	1012	4	880564570
110	38	3	886988574
110	301	2	886987505
110	307	4	886987260
110	568	3	886988449
110	578	3	886988536
110	682	4	886987354
110	688	1	886987605
110	944	3	886989501
110	1179	2	886989501
110	1246	2	886989613
111	269	5	891679692
111	272	3	891679692
111	301	4	891680028
111	313	4	891679901
111	326	3	891680131
111	328	4	891679939
111	340	4	891679692
111	887	3	891679692
111	896	2	891680243
111	1024	3	891679939
112	289	5	884992690
112	306	5	891299783
112	322	4	884992690
112	327	1	884992535
112	331	4	884992603
112	354	3	891304031
112	689	4	884992668
112	748	3	884992651
112	750	4	884992444
112	903	1	892440172
113	100	4	875935610
113	126	5	875076827
113	262	2	875075983
113	294	4	875935277
113	321	3	875075887
113	326	5	875935609
113	327	5	875076987
113	329	3	875935312
113	595	5	875936424
113	976	5	875936424
114	157	2	881260611
114	175	5	881259955
114	183	5	881260545
114	191	3	881309511
114	195	4	881260861
114	204	3	881260441
114	269	4	881256090
114	505	3	881260203
114	507	3	881260303
114	1104	5	881260352
115	8	5	881171982
115	11	4	881171348
115	20	3	881171009
115	92	4	881172049
115	127	5	881171760
115	228	4	881171488
115	234	5	881171982
115	265	2	881171488
115	762	4	881170508
115	1067	4	881171009
116	7	2	876453915
116	185	3	876453519
116	250	4	876452606
116	255	3	876452524
116	271	4	886310197
116	331	3	876451911
116	350	3	886977926
116	751	3	890131577
116	942	3	876454090
116	1216	3	876452582
117	15	5	880125887
117	50	5	880126022
117	150	4	880125101
117	151	4	880126373
117	181	5	880124648
117	268	5	880124306
117	405	5	880126174
117	758	2	881011217
117	829	3	881010219
117	1047	2	881009697
118	156	5	875384946
118	174	5	875385007
118	176	5	875384793
118	200	5	875384647
118	324	4	875384444
118	433	5	875384793
118	475	5	875384793
118	547	5	875385228
118	654	5	875385007
118	774	5	875385198
119	213	5	874781257
119	222	5	874775311
119	237	5	874775038
119	313	5	886176135
119	328	4	876923913
119	382	5	874781742
119	392	4	886176814
119	407	3	887038665
119	718	5	874774956
119	1153	5	874781198
120	9	4	889489886
120	25	5	889490370
120	245	3	889490633
120	252	3	889490633
120	257	2	889490979
120	282	4	889490172
120	286	5	889489943
120	405	4	889490580
120	546	2	889490979
120	924	4	889490290
121	14	5	891390014
121	86	5	891388286
121	117	1	891388600
121	121	2	891388501
121	180	3	891388286
121	291	3	891390477
121	405	2	891390579
121	509	5	891388145
121	514	3	891387947
121	740	3	891390544
122	212	5	879270567
122	215	4	879270676
122	378	4	879270769
122	387	5	879270459
122	427	3	879270165
122	509	4	879270511
122	510	4	879270327
122	708	5	879270605
122	715	5	879270741
122	1268	2	879270711
123	13	3	879873988
123	22	4	879809943
123	135	5	879872868
123	165	5	879872672
123	192	5	879873119
123	275	4	879873726
123	427	3	879873020
123	531	3	879872671
123	606	3	879872540
123	847	4	879873193
124	11	5	890287645
124	50	3	890287508
124	79	3	890287395
124	96	4	890399864
124	157	2	890287936
124	166	5	890287645
124	226	4	890287645
124	496	1	890286933
124	550	4	890287645
124	616	4	890287645
125	80	4	892838865
125	134	5	879454532
125	163	5	879454956
125	190	5	892836309
125	235	2	892838559
125	318	5	879454309
125	382	1	892836623
125	478	4	879454628
125	657	3	892836422
125	997	2	892838976
126	245	3	887854726
126	258	4	887853919
126	262	4	887854726
126	294	3	887855087
126	322	3	887854777
126	323	3	887853568
126	332	2	887853735
126	878	5	887938392
126	884	5	887938392
126	905	2	887855283
127	227	4	884364867
127	229	5	884364867
127	243	5	884364764
127	268	1	884363990
127	286	1	884364525
127	294	4	884363803
127	300	5	884364017
127	380	5	884364950
127	449	4	884364950
127	748	5	884364108
128	15	4	879968827
128	182	4	879967225
128	204	4	879967478
128	317	4	879968029
128	371	1	879966954
128	482	4	879967432
128	485	3	879966895
128	508	4	879967767
128	603	5	879966839
128	739	4	879969349
129	269	4	883244011
129	270	3	883243934
129	272	4	883243972
129	303	3	883244011
129	307	2	883244637
129	313	3	883243934
129	331	2	883244737
129	339	2	883244737
129	873	1	883245452
129	995	2	883245452
130	105	4	876251160
130	109	3	874953794
130	216	4	875216545
130	379	4	875801662
130	642	4	875216933
130	1014	3	876250718
130	1017	3	874953895
130	1217	4	875801778
130	1246	3	876252497
130	1248	3	880396702
131	1	4	883681384
131	100	5	883681418
131	126	4	883681514
131	221	3	883681561
131	274	3	883681351
131	275	2	883681384
131	313	5	883681723
131	750	5	883681723
131	845	4	883681351
131	1281	4	883681561
132	12	4	891278867
132	56	5	891278996
132	124	4	891278996
132	127	4	891278937
132	137	4	891278996
132	154	4	891278996
132	175	3	891278807
132	275	3	891278915
132	523	4	891278996
132	922	5	891278996
133	258	5	890588639
133	260	1	890588878
133	272	5	890588672
133	294	3	890588852
133	304	3	890588639
133	308	4	890588639
133	315	4	890588524
133	322	2	890588852
133	328	3	890588577
133	751	3	890588547
134	258	4	891732122
134	259	2	891732393
134	286	3	891732334
134	300	3	891732220
134	313	5	891732150
134	323	4	891732335
134	339	2	891732507
134	539	4	891732335
134	748	5	891732365
134	879	4	891732393
135	23	4	879857765
135	39	3	879857931
135	227	3	879857843
135	229	2	879857843
135	233	3	879857843
135	294	4	879857575
135	431	2	879857868
135	449	3	879857843
135	1046	3	879858003
135	1208	3	879858003
136	14	5	882693338
136	56	4	882848783
136	89	4	882848925
136	117	4	882694498
136	276	5	882693489
136	298	4	882693569
136	313	2	882693234
136	747	4	882848866
136	847	4	882693371
136	1142	4	882693569
137	50	5	881432937
137	55	5	881433689
137	144	5	881433689
137	195	5	881433689
137	237	4	881432965
137	261	5	882805603
137	300	5	881432524
137	327	4	881432671
137	546	5	881433116
137	687	4	881432756
138	26	5	879024232
138	121	4	879023558
138	151	4	879023389
138	211	4	879024183
138	483	5	879024280
138	484	4	879024127
138	493	4	879024382
138	496	4	879024043
138	517	4	879024279
138	523	5	879024043
139	127	5	879538578
139	222	3	879538199
139	246	4	879538218
139	268	4	879537876
139	286	4	879537844
139	303	5	879538021
139	307	4	879537876
139	458	4	879538578
139	508	4	879538255
139	1176	4	879538080
140	258	3	879013617
140	268	4	879013684
140	289	4	879013719
140	301	3	879013747
140	319	4	879013617
140	322	3	879013684
140	325	3	879013719
140	332	3	879013617
140	334	2	879013684
140	880	4	879013832
141	125	5	884585642
141	222	4	884584865
141	245	3	884584426
141	258	5	884584338
141	274	5	884585220
141	472	5	884585274
141	535	5	884585195
141	744	5	884584981
141	826	2	884585437
141	932	3	884585128
142	28	4	888640404
142	82	4	888640356
142	89	3	888640489
142	169	5	888640356
142	181	5	888640317
142	189	4	888640317
142	243	1	888640199
142	350	4	888639882
142	362	3	888639920
142	895	4	888640143
143	272	4	888407586
143	313	5	888407586
143	323	3	888407656
143	325	5	888407741
143	328	4	888407656
143	331	5	888407622
143	333	5	888407708
143	347	5	888407741
143	682	3	888407741
143	1038	3	888407656
144	89	3	888105691
144	106	3	888104684
144	125	4	888104191
144	153	5	888105823
144	182	3	888105743
144	508	4	888104150
144	699	4	888106106
144	709	4	888105940
144	742	4	888104122
144	831	3	888104805
145	15	2	875270655
145	56	5	875271896
145	237	5	875270570
145	275	2	885557505
145	355	3	888396967
145	737	2	875272833
145	756	2	885557506
145	764	2	888398257
145	974	1	882182634
145	1248	3	875272195
146	262	4	891457714
146	300	3	891457943
146	302	4	891457538
146	307	3	891457905
146	313	4	891457591
146	346	4	891457591
146	347	3	891457493
146	688	1	891457749
146	1022	5	891458193
146	1294	4	891457749
147	258	4	885594040
147	269	4	885593812
147	292	5	885594040
147	305	4	885593997
147	339	5	885594204
147	340	4	885593965
147	345	4	885594040
147	690	4	885593965
147	751	2	885593965
147	904	5	885594015
148	1	4	877019411
148	70	5	877021271
148	114	5	877016735
148	140	1	877019882
148	172	5	877016513
148	177	2	877020715
148	185	1	877398385
148	408	5	877399018
148	495	4	877016735
148	1149	5	877016513
149	269	5	883512557
149	301	3	883512813
149	305	4	883512658
149	308	2	883512658
149	310	2	883512689
149	312	1	883512950
149	319	2	883512658
149	327	2	883512689
149	689	2	883512950
149	896	4	883512689
150	1	4	878746441
150	13	4	878746889
150	100	2	878746636
150	121	2	878747322
150	129	4	878746946
150	181	5	878746685
150	221	4	878747017
150	246	5	878746719
150	293	4	878746946
150	325	1	878747322
151	10	5	879524921
151	12	5	879524368
151	13	3	879542688
151	176	2	879524293
151	197	5	879528710
151	703	4	879542460
151	747	3	879524564
151	835	5	879524199
151	919	5	879524368
151	929	3	879543457
152	25	3	880149045
152	97	5	882475618
152	111	5	880148782
152	132	5	882475496
152	147	3	880149045
152	272	5	890322298
152	301	3	880147407
152	412	2	880149328
152	685	5	880149074
152	716	5	884019001
153	22	2	881371140
153	56	5	881371140
153	64	5	881371005
153	127	3	881371140
153	174	1	881371140
153	216	2	881371032
153	321	3	881370900
153	323	2	881370900
153	510	3	881371198
153	678	2	881370935
154	137	3	879138657
154	175	5	879138784
154	242	3	879138235
154	286	4	879138235
154	289	2	879138345
154	302	4	879138235
154	357	4	879138713
154	484	4	879139096
154	488	4	879138831
154	806	4	879139040
155	286	4	879370860
155	294	3	879371194
155	319	3	879370963
155	321	4	879370963
155	323	2	879371261
155	324	2	879370963
155	325	2	879371261
155	328	2	879370860
155	748	2	879371261
155	988	2	879371261
156	12	3	888185853
156	58	4	888185906
156	64	3	888185677
156	137	4	888185735
156	192	4	888185735
156	205	3	888185735
156	276	3	888185854
156	317	4	888185906
156	641	5	888185677
156	661	4	888185947
157	25	3	886890787
157	127	5	886890541
157	150	5	874813703
157	250	1	886890296
157	273	5	886889876
157	274	4	886890835
157	283	4	886890692
157	405	3	886890342
157	748	2	886890015
157	1132	3	886891132
158	24	4	880134261
158	72	3	880135118
158	128	2	880134296
158	177	4	880134407
158	241	4	880134445
158	510	3	880134296
158	665	2	880134532
158	729	3	880133116
158	770	5	880134477
158	1098	4	880135069
159	111	4	880556981
159	127	5	880989744
159	249	4	884027269
159	259	4	893255969
159	323	4	880485443
159	328	3	893255993
159	685	4	880557347
159	815	3	880557387
159	1028	5	880557539
159	1037	2	884360502
160	56	5	876770222
160	117	4	876767822
160	135	4	876860807
160	160	5	876862078
160	174	5	876860807
160	234	5	876861185
160	430	5	876861799
160	460	2	876861185
160	462	4	876858346
160	719	3	876857977
161	14	4	891171413
161	48	1	891170745
161	98	4	891171357
161	162	2	891171413
161	168	1	891171174
161	174	2	891170800
161	202	5	891170769
161	318	3	891170824
161	582	1	891170800
161	898	3	891170191
162	25	4	877635573
162	121	4	877636000
162	181	4	877635798
162	222	4	877635758
162	230	2	877636860
162	298	4	877635690
162	685	3	877635917
162	742	4	877635758
162	1019	4	877636556
162	1047	5	877635896
163	56	4	891220097
163	64	4	891220161
163	97	4	891220019
163	98	4	891220196
163	216	3	891220196
163	234	3	891220137
163	286	3	891219977
163	288	3	891220226
163	318	4	891220161
163	347	4	891219976
164	117	5	889401816
164	281	4	889401906
164	299	4	889401383
164	406	2	889402389
164	458	4	889402050
164	597	4	889402225
164	620	3	889402298
164	685	5	889402160
164	689	5	889401490
164	930	4	889402340
165	69	3	879525799
165	181	5	879525738
165	216	4	879525778
165	258	5	879525672
165	288	2	879525673
165	304	3	879525672
165	325	4	879525672
165	372	5	879525987
165	419	4	879525706
165	651	5	879525961
166	258	4	886397562
166	288	3	886397510
166	300	5	886397723
166	322	5	886397723
166	323	5	886397722
166	328	5	886397722
166	343	4	886397882
166	346	1	886397596
166	748	2	886397751
166	894	4	886397905
167	48	1	892738277
167	232	1	892738341
167	364	3	892738212
167	392	1	892738307
167	404	3	892738278
167	486	4	892738452
167	603	4	892738212
167	659	4	892738277
167	675	1	892738277
167	1306	5	892738385
168	151	5	884288058
168	235	2	884288270
168	255	1	884287560
168	274	4	884287865
168	284	2	884288112
168	295	4	884287615
168	596	4	884287615
168	866	5	884287927
168	1197	5	884287927
168	1278	3	884287560
169	133	4	891359171
169	172	5	891359317
169	174	4	891359418
169	181	5	891359276
169	260	1	891269104
169	301	4	891268622
169	308	3	891268776
169	429	3	891359250
169	603	5	891359171
169	879	5	891268653
170	245	5	884103758
170	288	3	884706012
170	292	5	884103732
170	299	3	886190476
170	326	5	886623057
170	328	3	884103860
170	333	4	886190330
170	749	5	887646170
170	881	3	886190419
170	984	5	884103918
171	245	3	891034801
171	262	4	891034641
171	268	4	891034684
171	292	4	891034835
171	302	4	891034606
171	306	3	891034606
171	313	4	891034835
171	327	4	891034835
171	344	3	891034889
171	1022	3	891034889
172	177	4	875537965
172	220	4	875537441
172	462	3	875537717
172	478	3	875538027
172	485	3	875538028
172	488	3	875537965
172	580	4	875538028
172	603	3	875538027
172	657	3	875538027
172	697	3	875536498
173	242	5	877556626
173	260	4	877557345
173	286	5	877556626
173	289	4	877556988
173	294	5	877556864
173	300	4	877556988
173	322	4	877557028
173	323	5	877556926
173	328	5	877557028
173	938	3	877557076
174	80	1	886515210
174	160	5	886514377
174	237	4	886434047
174	315	5	886432749
174	368	1	886434402
174	395	1	886515154
174	402	5	886513729
174	471	5	886433804
174	660	5	886514261
174	937	5	886432989
175	31	4	877108051
175	56	2	877107790
175	71	4	877107942
175	96	3	877108051
175	127	5	877107640
175	176	3	877107255
175	183	4	877107942
175	483	5	877107339
175	629	3	877107942
175	669	1	877107790
176	258	4	886047026
176	272	5	886047068
176	288	3	886046979
176	294	2	886047220
176	297	3	886047918
176	305	5	886047068
176	324	5	886047292
176	327	3	886047176
176	751	1	886046979
176	875	4	886047442
177	56	5	880130618
177	69	1	880131088
177	79	4	880130758
177	203	4	880131026
177	209	4	880130736
177	243	1	882142141
177	299	4	880130500
177	321	2	880130481
177	333	4	880130397
177	960	3	880131161
178	199	4	882826306
178	248	4	882823954
178	317	4	882826915
178	332	3	882823437
178	385	4	882826982
178	433	4	882827834
178	568	4	882826555
178	731	4	882827532
178	742	3	882823833
178	845	4	882824291
179	258	5	892151270
179	305	4	892151270
179	315	5	892151202
179	316	5	892151202
179	339	1	892151366
179	345	1	892151565
179	354	4	892151331
179	751	1	892151565
179	895	5	892151565
179	905	4	892151331
180	67	1	877127591
180	68	5	877127721
180	79	3	877442037
180	202	3	877128388
180	431	4	877442098
180	433	5	877127273
180	462	5	877544218
180	737	3	877128327
180	762	4	877126241
180	1119	3	877128156
181	3	2	878963441
181	220	4	878962392
181	264	2	878961624
181	279	1	878962955
181	306	1	878962006
181	325	2	878961814
181	872	1	878961814
181	938	1	878961586
181	1081	1	878962623
181	1295	1	878961781
182	69	5	876435435
182	100	3	885613067
182	121	3	885613117
182	172	5	876435435
182	237	3	885613067
182	293	3	885613152
182	423	5	876436480
182	763	3	885613092
182	845	3	885613067
182	864	4	885613092
183	88	3	891466760
183	96	3	891463617
183	225	1	891467546
183	241	4	892323453
183	250	2	891464352
183	405	4	891464393
183	483	5	892323452
183	562	3	891467003
183	720	4	892323453
183	1217	3	891466405
184	98	4	889908539
184	153	3	889911285
184	187	4	889909024
184	191	4	889908716
184	218	3	889909840
184	277	3	889907971
184	321	5	889906967
184	412	2	889912691
184	522	3	889908462
184	602	4	889909691
185	23	4	883524249
185	114	4	883524320
185	127	5	883525183
185	199	4	883526268
185	216	4	883526268
185	237	4	883526268
185	269	5	883524428
185	287	5	883526288
185	528	4	883526268
185	740	4	883524475
186	148	4	891719774
186	250	1	879023607
186	263	3	879023571
186	281	4	879023390
186	302	3	891717742
186	385	4	879023894
186	470	5	879023693
186	566	5	879023663
186	588	4	879024535
186	983	3	879023152
187	28	4	879465597
187	64	5	879465631
187	70	4	879465394
187	116	5	879464978
187	135	4	879465653
187	210	4	879465242
187	215	3	879465805
187	427	5	879465597
187	523	3	879465125
187	732	3	879465419
188	88	4	875075300
188	96	5	875073128
188	143	5	875072674
188	191	3	875073128
188	218	5	875074667
188	237	3	875073648
188	443	4	875074329
188	474	4	875072674
188	692	5	875072583
188	769	2	875074720
189	20	5	893264466
189	56	5	893265263
189	197	5	893265291
189	512	4	893277702
189	520	5	893265380
189	526	4	893266205
189	634	3	893265506
189	751	4	893265046
189	1005	4	893265971
189	1060	5	893264301
190	117	4	891033697
190	147	4	891033863
190	282	3	891033773
190	302	5	891033606
190	340	1	891033153
190	717	3	891042938
190	742	3	891033841
190	751	4	891033606
190	974	2	891625949
190	977	2	891042938
191	286	4	891560842
191	288	3	891562090
191	301	4	891561336
191	302	4	891560253
191	307	3	891560935
191	313	5	891560481
191	751	3	891560753
191	752	3	891560481
191	754	3	891560366
191	896	3	891562090
192	127	4	881367456
192	252	1	881368277
192	301	4	881366490
192	302	5	881366489
192	340	4	881366535
192	476	2	881368243
192	948	3	881368302
192	1061	4	881368891
192	1160	4	881367456
192	1405	5	881367456
193	96	1	889124507
193	407	4	889127921
193	410	3	889127633
193	435	4	889124439
193	627	4	889126972
193	790	3	889127381
193	869	3	889127811
193	879	3	889123257
193	941	4	889124890
193	1078	4	889126943
194	54	3	879525876
194	66	3	879527264
194	165	4	879546723
194	172	3	879521474
194	181	3	879521396
194	274	2	879539794
194	385	2	879524643
194	466	4	879525876
194	1028	2	879541148
194	1211	2	879551380
195	154	3	888737525
195	265	4	888737346
195	273	4	878019342
195	300	3	890588925
195	328	4	884420059
195	387	4	891762491
195	496	4	888737525
195	751	4	883295500
195	1014	4	879673925
195	1052	1	877835102
196	67	5	881252017
196	111	4	881251793
196	238	4	881251820
196	242	3	881250949
196	251	3	881251274
196	306	4	881251021
196	381	4	881251728
196	393	4	881251863
196	655	5	881251793
196	663	5	881251911
197	55	3	891409982
197	96	5	891409839
197	229	3	891410039
197	300	4	891409422
197	302	3	891409070
197	346	3	891409070
197	347	4	891409070
197	511	5	891409839
197	515	5	891409935
197	688	1	891409564
198	7	4	884205317
198	58	3	884208173
198	100	1	884207325
198	118	2	884206513
198	135	5	884208061
198	179	4	884209264
198	234	3	884207833
198	258	4	884204501
198	498	3	884207492
198	658	3	884208173
199	221	4	883782854
199	242	5	883782485
199	258	4	883782403
199	268	5	883782509
199	294	1	883782636
199	322	2	883782636
199	324	1	883782509
199	473	4	883783005
199	678	1	883782636
199	988	1	883782655
200	11	5	884129542
200	96	5	884129409
200	222	5	876042340
200	304	5	876041644
200	318	5	884128458
200	365	5	884129962
200	478	5	884128788
200	588	5	884128499
200	673	5	884128554
200	892	4	884127082
[truncated: 7,430 more rows]
