# Supplementary material
Source: ML conference proceedings conference paper supplement (https://proceedings.neurips.cc/paper_files/paper/2022/hash/01ecd39ca49ddecc5729ca996304781b-Abstract.html)
Supplement: Supplementary file 1 [file 01ecd39ca49ddecc5729ca996304781b-Supplemental-Conference.zip › supplementary NEURIPS 2022/CODE_supplementary/data/ml-100k/ub.test]

1	17	3	875073198
1	47	4	875072125
1	64	5	875072404
1	90	4	878542300
1	92	3	876892425
1	113	5	878542738
1	222	4	878873388
1	227	4	876892946
1	228	5	878543541
1	253	5	874965970
2	257	4	888551062
2	279	4	888551745
2	299	4	888550774
2	301	4	888550631
2	303	4	888550774
2	307	3	888550066
2	308	3	888979945
2	313	5	888552084
2	315	1	888550774
2	316	5	888979693
3	299	3	889237199
3	300	2	889236939
3	318	4	889237482
3	324	2	889237247
3	330	2	889237297
3	341	1	889237055
3	345	3	889237004
3	348	4	889237455
3	350	3	889237076
3	351	3	889237315
4	11	4	892004520
4	210	3	892003374
4	258	5	892001374
4	271	4	892001690
4	300	5	892001445
4	324	5	892002353
4	327	5	892002352
4	328	3	892001537
4	329	5	892002352
4	359	5	892002352
5	24	4	879198229
5	62	4	875637575
5	102	3	875721196
5	211	4	875636631
5	231	2	875635947
5	376	2	879198045
5	377	1	878844615
5	382	5	875636587
5	407	3	875635431
5	423	4	875636793
6	143	2	883601053
6	211	5	883601155
6	221	4	883599431
6	275	4	883599102
6	294	2	883599938
6	357	4	883602422
6	469	5	883601155
6	478	4	883602762
6	508	3	883599530
6	532	3	883600066
7	171	3	891351287
7	200	5	891353543
7	378	5	891353011
7	451	5	891353892
7	472	2	891353357
7	543	3	891351772
7	554	3	891354639
7	623	3	891354217
7	644	5	891351685
7	662	3	892133739
8	7	3	879362287
8	56	5	879362183
8	144	5	879362286
8	172	5	879362123
8	190	4	879362183
8	301	4	879361550
8	511	5	879362183
8	568	4	879362233
8	685	4	879362423
8	686	3	879362356
9	50	5	886960055
9	201	5	886960055
9	242	4	886958715
9	276	4	886959423
9	294	4	886959453
9	371	5	886960055
9	402	4	886959343
9	483	5	886960056
9	615	4	886959344
9	690	1	886959344
10	48	4	877889058
10	203	4	877891967
10	289	4	877886223
10	321	4	879163494
10	340	4	880371312
10	463	4	877889186
10	489	4	877892210
10	505	4	877886846
10	655	5	877891904
10	657	4	877892110
11	190	3	891904174
11	230	4	891905783
11	312	4	891902157
11	517	2	891905222
11	561	2	891905936
11	660	3	891904573
11	714	4	891904214
11	720	1	891904717
11	741	5	891902745
11	746	4	891905032
12	15	5	879959670
12	28	5	879958969
12	71	4	879959635
12	157	5	879959138
12	191	5	879960801
12	196	5	879959553
12	276	4	879959488
12	684	5	879959105
12	753	5	879960679
12	754	4	879958810
13	229	4	882397650
13	418	2	882398763
13	498	4	882139901
13	780	1	882142057
13	809	4	882397582
13	823	5	882397833
13	858	1	882397068
13	864	4	882141924
13	892	3	882774224
13	901	1	883670672
14	56	5	879119579
14	93	3	879119311
14	100	5	876965165
14	151	5	876964725
14	175	5	879119497
14	313	2	890880970
14	455	4	880929745
14	514	4	879119579
14	519	5	890881335
14	792	5	879119651
15	20	3	879455541
15	137	4	879455939
15	278	1	879455843
15	289	3	879455262
15	301	4	879455233
15	508	2	879455789
15	620	4	879456204
15	696	2	879456262
15	742	2	879456049
15	924	3	879456204
16	56	5	877719863
16	70	4	877720118
16	92	4	877721905
16	144	5	877721142
16	155	3	877719157
16	168	4	877721142
16	191	5	877719454
16	471	3	877724845
16	504	5	877718168
16	942	4	877719863
17	7	4	885272487
17	100	4	885272520
17	126	4	885272724
17	137	4	885272606
17	150	5	885272654
17	286	3	885165619
17	294	4	885166209
17	323	1	885166256
17	471	2	885272779
17	919	4	885272696
18	58	4	880130613
18	154	4	880131358
18	196	3	880131297
18	199	3	880129769
18	387	4	880130155
18	494	3	880131497
18	607	3	880131752
18	647	4	880129595
18	863	3	880130680
18	965	4	880132012
19	8	5	885412723
19	202	4	885412723
19	210	3	885412840
19	211	4	885412840
19	268	2	885412034
19	288	3	885411840
19	294	3	885412034
19	319	4	885411465
19	325	4	885412251
19	887	4	885411465
20	1	3	879667963
20	69	1	879668979
20	95	3	879669181
20	121	3	879668227
20	144	2	879669401
20	252	4	879669697
20	568	4	879669291
20	597	3	879668190
20	742	4	879668166
20	931	1	879668829
21	98	5	874951657
21	184	4	874951797
21	298	5	874951382
21	299	1	874950931
21	457	1	874951054
21	590	1	874951898
21	596	3	874951617
21	742	3	874951617
21	839	1	874951797
21	928	3	874951616
22	96	5	878887680
22	173	5	878886368
22	186	5	878886368
22	227	4	878888067
22	294	1	878886262
22	399	4	878887157
22	433	3	878886479
22	456	1	878887413
22	687	1	878887476
22	780	1	878887377
23	83	4	874785926
23	88	3	874787410
23	90	2	874787370
23	183	3	874785728
23	213	3	874785675
23	215	2	874787116
23	483	4	884550048
23	511	5	874786770
23	516	4	874787330
23	528	4	874786974
24	25	4	875246258
24	56	4	875323240
24	178	5	875323676
24	258	4	875245985
24	275	5	875323507
24	286	5	875323773
24	294	3	875246037
24	318	5	875323474
24	477	5	875323594
24	508	4	875323833
25	127	3	885853030
25	174	5	885853415
25	269	4	885851953
25	455	4	885853415
25	477	4	885853155
25	478	5	885852271
25	480	4	885852008
25	498	4	885852086
25	729	4	885852697
25	742	4	885852569
26	7	3	891350826
26	9	4	891386369
26	100	5	891386368
26	257	3	891371596
26	269	4	891347478
26	286	3	891347400
26	321	3	891347949
26	343	3	891349238
26	508	3	891352941
26	864	2	891383899
27	50	3	891542897
27	100	5	891543129
27	118	3	891543222
27	148	3	891543129
27	244	3	891543222
27	286	3	891543393
27	295	3	891543164
27	325	2	891543191
27	508	3	891542987
27	515	4	891543009
28	12	4	881956853
28	50	4	881957090
28	100	5	881957425
28	153	3	881961214
28	174	5	881956334
28	184	4	881961671
28	282	4	881957425
28	441	2	881961782
28	480	5	881957002
28	895	4	882826398
29	259	4	882821044
29	269	4	882820897
29	270	4	882820803
29	286	5	882820663
29	294	4	882820730
29	300	3	882820897
29	302	4	882820663
29	343	3	882821673
29	480	4	882821989
29	874	4	882821020
30	7	4	875140648
30	28	4	885941321
30	231	2	875061066
30	242	5	885941156
30	258	5	885941156
30	294	4	875140648
30	301	4	875988577
30	531	5	885941156
30	538	4	885941798
30	1013	3	875060334
31	32	5	881548030
31	79	2	881548082
31	124	4	881548110
31	175	5	881548053
31	268	3	881547746
31	319	4	881547788
31	340	3	881547788
31	490	4	881548030
31	514	5	881548030
31	875	4	881547938
32	100	3	883717662
32	118	3	883717967
32	122	2	883718250
32	235	3	883718121
32	245	2	883710047
32	257	4	883717537
32	259	2	883709986
32	508	4	883717581
32	866	3	883718031
32	1016	1	883718121
33	245	3	891964326
33	260	4	891964306
33	271	4	891964166
33	294	3	891964166
33	323	4	891964373
33	339	3	891964111
33	348	4	891964404
33	678	4	891964306
33	682	4	891964274
33	879	3	891964230
34	288	2	888601628
34	289	1	888602950
34	292	5	888602742
34	294	1	888602808
34	324	5	888602808
34	898	5	888602842
34	899	5	888603123
34	990	5	888602808
34	991	4	888602618
34	1024	5	888602618
35	258	2	875458941
35	327	3	875459017
35	328	3	875459046
35	333	4	875459017
35	358	1	875459073
35	678	3	875459017
35	748	4	875458970
35	876	2	875458970
35	879	4	875459073
35	937	4	875459237
36	261	5	882157581
36	288	4	882157227
36	289	2	882157356
36	310	4	882157327
36	333	4	882157227
36	358	5	882157581
36	873	3	882157386
36	875	3	882157470
36	878	5	882157581
36	1026	5	882157581
37	11	4	880915838
37	22	5	880915810
37	24	4	880915674
37	161	5	880915902
37	176	4	880915942
37	195	5	880915874
37	265	4	880930072
37	363	3	880915711
37	597	5	880915607
37	948	4	880915407
38	122	1	892434801
38	216	5	892430486
38	318	3	892430071
38	384	5	892433660
38	403	1	892432205
38	423	5	892430071
38	508	2	892429399
38	672	3	892434800
38	838	2	892433680
38	1030	5	892434475
39	269	4	891400188
39	270	4	891400609
39	272	2	891400094
39	288	5	891400704
39	294	4	891400609
39	301	3	891400280
39	307	2	891400342
39	339	3	891400609
39	748	5	891400704
39	937	5	891400704
40	245	3	889041671
40	269	1	889041283
40	286	2	889041430
40	294	4	889041671
40	305	4	889041430
40	337	4	889041523
40	347	2	889041283
40	750	3	889041523
40	879	2	889041595
40	896	4	889041402
41	1	4	890692860
41	69	4	890687145
41	100	4	890687242
41	153	4	890687087
41	174	4	890687264
41	181	4	890687175
41	209	4	890687642
41	289	2	890686673
41	423	2	890687175
41	518	3	890687412
42	69	4	881107375
42	98	4	881106711
42	176	3	881107178
42	185	4	881107449
42	195	5	881107949
42	603	4	881107502
42	684	4	881108093
42	685	4	881105972
42	953	2	881108815
42	1041	4	881109060
43	26	5	883954901
43	52	4	883955224
43	64	5	875981247
43	66	4	875981506
43	114	5	883954950
43	284	5	883955441
43	553	4	875981159
43	631	2	883955675
43	820	2	884029742
43	1057	2	884029777
44	56	2	878348601
44	95	4	878347569
44	120	4	878346977
44	123	4	878346532
44	174	5	878347662
44	208	4	878347420
44	230	2	883613335
44	250	5	878346709
44	530	5	878348725
44	665	1	883613372
45	1	5	881013176
45	15	4	881012184
45	21	3	881014193
45	100	5	881010742
45	108	4	881014620
45	237	4	881008636
45	276	5	881012184
45	823	4	881014785
45	952	4	881014247
45	1060	3	881012184
46	7	4	883616155
46	50	4	883616254
46	100	4	883616134
46	125	4	883616284
46	245	3	883614625
46	294	2	883611307
46	327	4	883611456
46	538	3	883611513
46	909	5	883614766
46	1024	5	883614766
47	258	4	879438984
47	269	4	879438984
47	288	2	879439078
47	289	4	879439040
47	301	4	879440333
47	303	4	879439112
47	307	4	879439112
47	322	2	879439078
47	327	4	879440360
47	874	3	879439078
48	50	4	879434723
48	187	5	879434954
48	202	4	879434791
48	266	3	879434387
48	306	4	879434211
48	423	4	879434752
48	511	5	879434954
48	522	2	879434886
48	654	5	879434792
48	988	2	879434387
49	7	4	888067307
49	17	2	888068651
49	38	1	888068289
49	49	2	888068990
49	148	1	888068195
49	238	4	888068762
49	334	4	888065744
49	473	3	888067164
49	741	4	888068079
49	758	1	888067596
50	15	2	877052438
50	268	4	877051656
50	276	2	877052400
50	288	4	877052008
50	319	5	877051687
50	324	5	877052008
50	508	5	877052438
50	544	4	877052937
50	1008	5	877052805
50	1010	5	877052329
51	50	5	883498685
51	134	2	883498844
51	136	4	883498756
51	144	5	883498894
51	172	5	883498936
51	173	5	883498844
51	184	3	883498685
51	210	4	883498844
51	479	3	883498655
51	655	3	883498728
52	15	5	882922204
52	93	4	882922357
52	235	2	882922806
52	275	4	882922328
52	287	5	882922357
52	427	5	882922833
52	531	5	882922833
52	657	5	882922833
52	742	4	882922540
52	845	5	882922485
53	64	5	879442384
53	96	4	879442514
53	118	4	879443253
53	121	4	879443329
53	258	4	879442654
53	546	4	879443329
53	568	4	879442538
53	628	5	879443253
53	748	2	879443329
53	1087	4	879443329
54	121	4	880936669
54	147	5	880935959
54	237	4	880935028
54	276	5	880931595
54	325	3	880930146
54	327	5	880928893
54	333	5	880928745
54	406	2	880938490
54	1012	2	880936669
54	1016	4	890609001
55	22	5	878176397
55	50	4	878176005
55	79	5	878176398
55	117	3	878176047
55	118	5	878176134
55	121	3	878176084
55	174	4	878176397
55	181	4	878176237
55	273	5	878176047
55	597	2	878176134
56	69	4	892678893
56	172	5	892737191
56	184	4	892679088
56	196	2	892678628
56	215	5	892678547
56	230	5	892676339
56	235	1	892911348
56	450	3	892679374
56	585	3	892911366
56	797	4	892910860
57	250	3	883697223
57	294	4	883696547
57	409	4	883697655
57	588	4	883698454
57	744	5	883698581
57	825	1	883697761
57	831	1	883697785
57	864	3	883697512
57	926	3	883697831
57	1059	3	883697432
58	42	4	884304936
58	45	5	884305295
58	222	4	884304656
58	248	4	884794774
58	272	5	884647314
58	284	4	884304519
58	475	5	884304609
58	960	4	884305004
58	1097	5	884504973
58	1100	2	884304979
59	54	4	888205921
59	77	4	888206254
59	148	3	888203175
59	177	4	888204349
59	387	3	888206562
59	418	2	888205188
59	429	4	888204597
59	550	5	888206605
59	583	5	888205921
59	1107	4	888206254
60	47	4	883326399
60	79	4	883326620
60	172	4	883326339
60	178	5	883326399
60	179	4	883326566
60	474	5	883326028
60	508	4	883327368
60	616	3	883327087
60	699	4	883327539
60	1020	4	883327018
61	258	4	891206125
61	269	3	891206125
61	271	1	892302231
61	294	2	891220884
61	300	5	891206407
61	310	4	891206194
61	327	2	891206407
61	333	3	891206232
61	748	2	892302120
61	751	3	891206274
62	59	4	879373821
62	86	2	879374640
62	111	3	879372670
62	114	4	879373568
62	132	5	879375022
62	182	5	879375169
62	258	5	879371909
62	288	2	879371909
62	302	3	879371909
62	433	5	879375588
63	6	3	875747439
63	109	4	875747731
63	150	4	875747292
63	222	3	875747635
63	237	3	875747342
63	246	3	875747514
63	251	4	875747514
63	301	5	875747010
63	841	1	875747917
63	948	3	875746948
64	2	3	889737609
64	77	3	889737420
64	93	2	889739025
64	187	5	889737395
64	231	3	889740880
64	333	3	879365313
64	515	5	889737478
64	527	4	879365590
64	959	4	889739903
64	1133	4	889739975
65	70	1	879216529
65	121	4	879217458
65	135	4	879216567
65	191	4	879216797
65	197	5	879216769
65	210	4	879217913
65	318	5	879217689
65	427	5	879216734
65	661	4	879216605
65	1129	4	879217258
66	15	3	883601456
66	21	1	883601939
66	24	3	883601582
66	127	4	883601156
66	280	4	883602044
66	281	4	883602044
66	288	4	883601607
66	475	2	883601156
66	741	4	883601664
66	742	5	883601388
67	7	5	875379794
67	25	4	875379420
67	122	3	875379566
67	123	4	875379322
67	276	4	875379515
67	472	4	875379706
67	546	3	875379288
67	827	3	875379322
67	833	4	875379794
67	871	3	875379594
68	50	5	876973969
68	125	1	876974096
68	258	5	876973692
68	282	1	876974315
68	286	5	876973692
68	288	4	876973726
68	458	1	876974048
68	471	3	876974023
68	475	5	876973917
68	1028	4	876974430
69	9	4	882126086
69	48	5	882145428
69	109	3	882145428
69	151	5	882072998
69	591	3	882072803
69	689	3	882027284
69	748	2	882027304
69	1017	5	882126156
69	1134	5	882072998
69	1143	5	882072998
70	71	3	884066399
70	151	3	884148603
70	152	4	884149877
70	176	4	884066573
70	202	4	884066713
70	260	2	884065247
70	265	4	884067503
70	417	3	884066823
70	423	5	884066910
70	751	4	884063601
71	50	3	885016784
71	64	4	885016536
71	65	5	885016961
71	135	4	885016536
71	151	1	877319446
71	154	3	877319610
71	175	4	885016882
71	197	5	885016990
71	257	5	877319414
71	289	2	877319117
72	28	4	880036824
72	79	4	880037119
72	89	3	880037164
72	129	4	880035588
72	196	4	880036747
72	226	4	880037307
72	427	5	880037702
72	527	4	880036746
72	528	4	880036664
72	530	4	880037164
73	7	4	888625956
73	28	3	888626468
73	48	2	888625785
73	156	4	888625835
73	196	4	888626177
73	202	2	888626577
73	286	4	888792192
73	474	5	888625200
73	479	5	888625127
73	1149	4	888626299
74	121	4	888333428
74	124	3	888333542
74	129	3	888333458
74	137	3	888333458
74	150	3	888333458
74	301	3	888333372
74	313	5	888333219
74	324	3	888333280
74	333	4	888333238
74	354	3	888333194
75	108	4	884050661
75	137	4	884050102
75	271	5	884051635
75	472	4	884050733
75	475	5	884049939
75	597	3	884050940
75	696	4	884050979
75	820	3	884050979
75	952	5	884050393
75	1150	4	884050705
76	12	3	882606060
76	59	4	875027981
76	64	5	875498777
76	150	5	875028880
76	258	3	875027206
76	333	3	879575966
76	421	3	875028682
76	474	5	875498278
76	518	3	875498895
76	690	2	882607017
77	4	3	884752721
77	50	4	884732345
77	153	5	884732685
77	176	4	884752757
77	179	5	884752806
77	181	3	884732278
77	265	3	884753152
77	276	2	884732991
77	431	5	884733695
77	498	5	884734016
78	25	3	879633785
78	93	4	879633766
78	237	5	879634264
78	288	4	879633467
78	294	3	879633495
78	327	1	879633495
78	476	3	879633767
78	813	2	879633745
78	871	3	879634199
78	880	5	879633600
79	6	4	891271901
79	7	5	891272016
79	137	4	891271870
79	286	5	891271792
79	301	3	891271308
79	313	2	891271086
79	325	5	891271792
79	370	2	891272016
79	813	5	891271792
79	900	4	891271245
80	100	5	887401453
80	154	3	887401307
80	199	2	887401353
80	208	5	887401604
80	213	3	887401407
80	215	5	887401353
80	234	3	887401533
80	260	1	883605215
80	303	4	883605055
80	699	3	887401533
81	7	4	876533545
81	93	3	876533657
81	118	2	876533764
81	124	3	876534594
81	274	3	876534313
81	282	5	876533619
81	410	4	876533946
81	412	1	876534408
81	926	3	876533824
81	1028	1	876534277
82	14	4	876311280
82	15	3	876311365
82	73	4	878769888
82	231	2	878769815
82	343	1	884713755
82	411	3	878768902
82	455	4	876311319
82	596	3	876311195
82	661	4	878769703
82	919	3	876311280
83	43	4	880308690
83	82	5	887665423
83	118	3	880307071
83	139	3	880308959
83	301	2	891181430
83	338	4	883868647
83	364	1	886534501
83	413	1	891182379
83	640	2	880308550
83	929	3	880307140
84	7	4	883452155
84	31	4	883453755
84	64	5	883450066
84	148	4	883452274
84	151	4	883449993
84	222	4	883450020
84	237	4	883450093
84	265	5	883453617
84	284	3	883450093
84	523	4	883453642
85	13	3	879452866
85	83	4	886282959
85	187	5	879454235
85	272	4	893110061
85	277	2	879452938
85	282	3	879829618
85	298	4	880581629
85	501	3	880838306
85	604	4	882995132
85	647	4	879453844
86	242	4	879569486
86	269	4	879569486
86	270	5	879570974
86	288	3	879570218
86	289	3	879570366
86	304	3	879570149
86	328	2	879569555
86	338	1	879570277
86	683	5	879570974
86	888	4	879570218
87	2	4	879876074
87	9	4	879877931
87	177	5	879875940
87	196	5	879877681
87	211	5	879876812
87	775	2	879876848
87	996	3	879876848
87	1000	3	879877173
87	1079	2	879877240
87	1183	3	879875995
88	286	5	891037111
88	300	3	891037466
88	308	4	891037396
88	311	5	891037336
88	313	3	891037201
88	319	3	891037708
88	354	5	891037708
88	880	3	891037466
88	898	4	891037859
88	1191	5	891038103
89	26	3	879459909
89	83	4	879459884
89	151	5	879441507
89	387	5	879459909
89	694	5	879460027
89	707	5	879459884
89	716	3	879460027
89	737	1	879460376
89	813	5	879461219
89	949	3	879460027
90	12	5	891383241
90	22	4	891384357
90	187	4	891383561
90	258	3	891382121
90	499	5	891383866
90	506	5	891383319
90	507	5	891383987
90	690	4	891383319
90	923	5	891383912
90	945	5	891383866
91	99	2	891439386
91	131	2	891439471
91	195	5	891439057
91	265	5	891439018
91	331	5	891438245
91	351	4	891438617
91	479	4	891439208
91	529	4	891438977
91	682	2	891438184
91	689	5	891438617
92	121	5	875640679
92	176	5	875652981
92	180	5	875653016
92	241	3	875655961
92	515	4	875640800
92	540	2	875813197
92	747	4	875656164
92	790	3	875907618
92	831	2	886443708
92	1209	1	875660468
93	1	5	888705321
93	14	4	888705200
93	118	3	888705416
93	121	3	888705053
93	125	1	888705416
93	151	1	888705360
93	276	2	888705257
93	283	4	888705146
93	866	2	888705780
93	934	3	888705988
94	24	4	885873423
94	155	2	891723807
94	174	4	885870231
94	216	3	885870665
94	218	3	891721851
94	471	4	891721642
94	572	3	891723883
94	651	5	891725332
94	792	4	885873006
94	860	2	891723706
95	128	3	879196354
95	143	4	880571951
95	174	5	879196231
95	395	3	888956928
95	416	4	888954961
95	483	3	879198697
95	636	1	879196566
95	1206	4	888956137
95	1229	2	879198800
95	1230	1	888956901
96	1	5	884403574
96	64	5	884403336
96	100	5	884403758
96	170	5	884403866
96	173	3	884402791
96	435	3	884403500
96	474	4	884403095
96	478	2	884403123
96	483	5	884403057
96	525	2	884402860
97	7	5	884238939
97	28	5	884238778
97	97	5	884239525
97	168	4	884238693
97	428	4	884239553
97	429	4	884238860
97	432	4	884238997
97	435	4	884238752
97	466	3	884239449
97	655	5	884238860
98	25	5	880499111
98	88	3	880499087
98	168	2	880498834
98	173	1	880498935
98	322	3	880498586
98	428	5	880498834
98	502	2	880499053
98	514	5	880498898
98	523	5	880498967
98	629	5	880499111
99	168	5	885680374
99	181	5	885680138
99	182	4	886518810
99	204	4	885679952
99	354	2	888469332
99	410	5	885679262
99	508	4	885678840
99	597	4	885679210
99	742	5	885679114
99	895	3	885678304
100	289	3	891375359
100	316	5	891375313
100	333	3	891374528
100	342	3	891375454
100	689	3	891375212
100	691	4	891375260
100	752	4	891375146
100	905	3	891375630
100	990	3	891375428
100	1236	3	891375630
101	24	4	877136391
101	109	2	877136360
101	118	3	877136424
101	121	4	877137015
101	815	3	877136392
101	840	3	877136659
101	928	2	877136302
101	1034	2	877136686
101	1051	2	877136891
101	1057	2	877136789
102	118	3	888801465
102	264	2	883277645
102	300	3	875886434
102	313	3	887048184
102	391	2	888802767
102	432	3	883748418
102	559	3	888803052
102	576	2	888802722
102	732	3	888804089
102	1025	2	883278200
103	69	3	880420585
103	96	4	880422009
103	204	3	880423118
103	234	3	880420353
103	250	4	880415918
103	252	2	880420020
103	301	4	880416704
103	405	3	880416424
103	471	4	880416921
103	1089	1	880420178
104	7	3	888465972
104	100	4	888465166
104	122	3	888465739
104	249	3	888465675
104	269	5	888441878
104	293	3	888465166
104	324	1	888442404
104	327	2	888442202
104	411	1	888465739
104	1241	1	888465379
105	264	2	889214491
105	269	4	889214193
105	271	2	889214245
105	302	5	889214193
105	313	5	889214193
105	327	4	889214406
105	340	3	889214245
105	343	2	889214524
105	690	3	889214306
105	748	2	889214406
106	15	3	883876518
106	45	3	881453290
106	64	4	881449830
106	69	4	881449886
106	77	4	881451716
106	97	5	881450810
106	165	5	881450536
106	273	3	881453290
106	286	4	881449486
106	584	4	881453481
107	259	2	891264630
107	264	3	891264598
107	286	2	891264266
107	288	3	891264432
107	312	4	891264535
107	313	2	891264266
107	322	1	891264535
107	323	1	891264566
107	325	3	891264659
107	902	5	891264501
108	10	5	879879834
108	14	5	879879720
108	21	3	879880141
108	127	4	879879720
108	137	5	879879941
108	222	2	879879720
108	304	3	879879662
108	471	2	879880076
108	515	5	879879941
108	718	4	879879985
109	31	4	880577844
109	89	4	880573263
109	100	4	880563080
109	101	1	880578186
109	154	2	880578121
109	258	5	880562908
109	588	4	880578388
109	627	5	880582133
109	797	3	880582856
109	975	3	880572351
110	79	4	886988480
110	82	4	886988480
110	188	4	886988574
110	202	2	886988909
110	245	3	886987540
110	300	3	886987380
110	540	3	886988793
110	734	2	886989566
110	1248	3	886989126
110	1250	3	886988818
111	242	4	891679901
111	258	4	891679692
111	302	5	891679971
111	303	3	891680028
111	305	2	891680243
111	315	5	891679692
111	321	3	891680076
111	333	4	891680028
111	344	2	891680243
111	354	4	891679692
112	300	4	884992508
112	302	4	886398509
112	303	4	884992535
112	312	5	884992872
112	316	5	892439693
112	325	1	884992714
112	347	1	891302716
112	678	3	884992714
112	754	4	884992508
112	984	3	884992651
113	242	2	875075887
113	246	5	875076872
113	277	3	875076416
113	286	4	875325377
113	319	2	875075887
113	322	3	875076044
113	324	2	875076180
113	508	4	875325377
113	678	2	875076044
113	1252	4	875935610
114	96	3	881259955
114	100	5	881259927
114	182	3	881259994
114	186	3	881260352
114	210	3	881309511
114	482	4	881259839
114	496	4	881259994
114	520	3	881260473
114	640	2	881260303
114	654	3	881259741
115	32	5	881171348
115	69	1	881171825
115	172	4	881171273
115	443	4	881171622
115	462	4	881171273
115	466	5	881171558
115	511	5	881172117
115	530	5	881172117
115	642	5	881171693
115	763	2	881170725
116	187	5	886310197
116	248	3	876452492
116	257	3	876452523
116	262	3	876751342
116	301	3	892683732
116	484	4	886310197
116	750	4	886309481
116	880	3	876680723
116	1016	2	876453376
116	1082	3	876453171
117	1	4	880126083
117	121	4	880126038
117	168	5	881012550
117	174	4	881011393
117	176	5	881012028
117	338	3	886019636
117	368	3	881010610
117	421	5	881012601
117	597	4	881010052
117	751	5	886018996
118	23	5	875384979
118	184	5	875385057
118	185	5	875384979
118	436	5	875385280
118	474	5	875384571
118	511	5	875384885
118	528	4	875384514
118	655	5	875385136
118	816	3	875385335
118	853	5	875385228
119	54	4	886176814
119	154	5	874782022
119	245	4	886176618
119	269	3	892564213
119	595	3	874781067
119	697	5	874782068
119	716	5	874782190
119	1101	5	874781779
119	1170	3	890627339
119	1262	3	890627252
120	1	4	889490412
120	15	4	889490244
120	117	3	889490979
120	121	4	889490290
120	125	4	889490447
120	148	3	889490499
120	237	3	889490172
120	258	5	889490124
120	742	4	889490549
120	827	2	889490979
121	9	5	891390013
121	98	5	891388210
121	122	2	891390501
121	125	2	891388600
121	126	3	891388936
121	137	5	891388501
121	174	3	891388063
121	235	1	891390579
121	249	1	891388708
121	428	5	891388333
122	70	5	879270606
122	175	5	879270084
122	187	4	879270424
122	191	5	879270128
122	214	2	879270676
122	511	5	879270084
122	553	3	879270741
122	727	4	879270849
122	737	4	879270874
122	792	3	879270459
123	50	3	879873726
123	127	5	879809943
123	255	1	879873905
123	285	5	879873830
123	485	5	879872792
123	487	3	879872192
123	511	5	879872066
123	704	3	879873120
123	707	5	879809943
123	735	2	879872868
124	28	3	890287068
124	98	4	890287822
124	144	4	890287645
124	154	5	890287645
124	168	5	890287645
124	172	3	890287645
124	173	2	890287687
124	174	3	890287317
124	209	3	890399902
124	474	3	890287221
125	97	3	879454385
125	150	1	879454892
125	152	1	879454892
125	173	5	879454100
125	239	5	892838375
125	483	4	879454628
125	615	3	879454793
125	785	3	892838558
125	796	3	892838591
125	1180	3	892838865
126	243	5	887855342
126	288	4	887853469
126	289	3	887855174
126	302	4	887853469
126	313	5	887854726
126	319	2	887938081
126	327	3	887855087
126	682	1	887855034
126	752	3	887855342
126	1175	5	887856958
127	62	5	884364950
127	222	5	884364866
127	228	5	884364866
127	258	5	884364017
127	271	5	884364866
127	288	5	884363851
127	343	5	884364151
127	450	5	884364950
127	750	1	884363851
127	901	5	884363990
128	79	4	879967692
128	111	3	879969215
128	140	4	879968308
128	143	5	879967300
128	228	3	879969329
128	276	4	879967550
128	283	5	879966729
128	418	4	879968164
128	736	5	879968352
128	747	3	879968742
129	245	2	883245452
129	258	2	883245452
129	268	1	883245452
129	286	5	883243934
129	288	1	883245452
129	302	4	883243934
129	311	3	883244059
129	327	3	883244060
129	678	1	883245452
129	882	2	883244662
130	206	3	875801695
130	234	5	875216932
130	307	4	877984546
130	316	4	888211794
130	542	3	875801778
130	569	3	880396494
130	731	3	876251922
130	806	3	875217096
130	901	1	884624044
130	949	3	876251944
131	14	5	883681313
131	19	4	883681418
131	124	5	883681313
131	242	5	883681723
131	251	5	883681723
131	276	5	883681723
131	285	5	883681723
131	286	5	883681514
131	293	3	883681442
131	302	5	883681723
132	50	3	891278774
132	100	4	891278744
132	151	3	891278774
132	251	4	891278996
132	285	4	891278996
132	286	3	891278680
132	484	4	891278807
132	521	4	891278996
132	664	5	891278996
132	1154	3	891278896
133	243	3	890589035
133	245	3	890588878
133	300	3	890588577
133	313	3	890588524
133	316	4	890588928
133	343	2	890589188
133	346	3	890588577
133	749	4	890588720
133	750	4	890588720
133	902	3	890588672
134	1	5	891732756
134	15	5	891732726
134	301	2	891732296
134	302	2	891732150
134	315	3	891732122
134	316	4	891732418
134	326	5	891732296
134	328	4	891732335
134	751	5	891732335
134	892	2	891732532
135	33	3	879857930
135	54	3	879858003
135	77	4	879858003
135	176	4	879857765
135	228	4	879857797
135	379	2	879857956
135	443	4	879857868
135	566	3	879857930
135	642	4	879857868
135	802	2	879858003
136	19	4	882693529
136	42	3	882848866
136	100	5	882693338
136	137	5	882693339
136	204	4	882848866
136	223	4	882848820
136	286	5	882693234
136	318	5	882848820
136	515	5	882694387
136	647	5	882848783
137	15	4	881432965
137	51	1	881433605
137	117	5	881433015
137	172	5	881433719
137	183	5	881433689
137	222	5	881432908
137	235	5	881433357
137	249	4	881433387
137	250	5	881433015
137	472	4	881433336
138	98	5	879024043
138	100	5	879022956
138	111	4	879022890
138	116	2	879022956
138	150	3	879023131
138	238	5	879024382
138	285	4	879023245
138	514	5	879024043
138	519	5	879024043
138	617	4	879024128
139	100	5	879538199
139	150	4	879538327
139	288	4	879537918
139	296	4	879538218
139	297	5	879538275
139	302	3	879537844
139	460	3	879538199
139	676	4	879538275
139	740	2	879538254
139	1233	5	879537844
140	245	3	879013720
140	286	5	879013617
140	288	3	879013617
140	294	3	879013651
140	302	4	879013617
140	304	4	879013747
140	321	4	879013651
140	872	3	879013651
140	873	2	879013719
140	988	3	879013719
141	50	4	884584735
141	225	3	884585523
141	237	4	884584865
141	405	3	884585105
141	471	4	884585039
141	546	4	884585470
141	748	3	884584664
141	750	1	886447564
141	825	4	884585247
141	1258	4	884585071
142	55	2	888640489
142	124	4	888640379
142	176	5	888640455
142	288	3	888639837
142	333	5	888639968
142	346	5	888639815
142	358	2	888640178
142	408	4	888640379
142	463	3	888640489
142	514	5	888640317
143	258	3	888407586
143	271	4	888407708
143	286	2	888407586
143	288	5	888407586
143	294	3	888407708
143	307	4	888407622
143	315	4	888407542
143	322	4	888407708
143	326	5	888407708
143	690	2	888407622
144	31	3	888105823
144	62	2	888105902
144	66	4	888106078
144	91	2	888106106
144	313	5	888103407
144	685	3	888105473
144	747	5	888105473
144	778	4	888106044
144	961	3	888106106
144	1147	4	888105587
145	13	5	875270507
145	22	5	875273021
145	183	5	875272009
145	260	4	875269871
145	393	5	875273174
145	448	5	877343121
145	472	3	875271128
145	591	4	879161848
145	743	1	888398516
145	1245	5	875271397
146	245	5	891458080
146	258	4	891457714
146	271	3	891457749
146	272	5	891457538
146	301	2	891457905
146	319	4	891457538
146	328	3	891458079
146	331	5	891458193
146	340	4	891457714
146	1293	5	891458080
147	270	3	885594204
147	286	5	885594040
147	301	5	885594204
147	302	4	885593845
147	304	5	885593942
147	313	4	885593965
147	319	4	885593812
147	750	5	885593812
147	898	5	885593965
147	937	3	885593997
148	71	5	877019251
148	98	3	877017714
148	214	5	877019882
148	228	4	877016514
148	357	5	877016735
148	473	5	877399322
148	501	4	877020297
148	529	5	877398901
148	596	5	877020297
148	1012	4	877400154
149	262	1	883512623
149	286	5	883512591
149	302	4	883512623
149	321	2	883512856
149	323	2	883512928
149	325	2	883512834
149	326	3	883512856
149	337	2	883512968
149	338	2	883512904
149	346	4	883512658
150	50	5	878746719
150	93	4	878746889
150	127	5	878746889
150	147	4	878746442
150	235	4	878746792
150	268	5	878746257
150	273	4	878746764
150	410	4	878747090
150	475	5	878746764
150	628	4	878747018
151	58	4	879524849
151	89	5	879524491
151	317	5	879524610
151	372	5	879524819
151	387	5	879542353
151	402	3	879543423
151	485	5	879525002
151	969	5	879542510
151	1006	1	879524974
151	1298	4	879528520
152	98	2	882473974
152	125	5	880149165
152	167	5	882477430
152	220	5	884035907
152	255	5	884035936
152	780	5	884019189
152	790	5	884018821
152	866	5	880149224
152	966	5	882829150
152	1028	5	880149197
153	50	1	881371140
153	79	5	881371198
153	172	1	881371140
153	181	1	881371140
153	182	5	881371198
153	258	5	881371336
153	265	4	881371032
153	294	2	881370859
153	325	2	881370935
153	357	5	881371059
154	50	5	879138657
154	89	5	879138910
154	143	3	879139003
154	182	5	879138783
154	202	3	879139096
154	333	3	879138287
154	462	3	879138831
154	480	5	879138784
154	640	5	879138713
154	708	4	879139003
155	288	3	879370860
155	292	3	879371061
155	300	2	879370963
155	306	5	879371121
155	322	2	879371261
155	326	2	879371121
155	327	2	879371061
155	331	3	879370860
155	332	2	879371121
155	990	3	879371194
156	11	2	888185906
156	22	3	888186093
156	48	4	888185777
156	124	3	888185677
156	180	5	888185777
156	197	5	888185777
156	211	4	888185606
156	318	4	888185947
156	346	3	888185561
156	357	4	888185677
157	1	5	874813703
157	3	3	886890734
157	93	3	886890692
157	137	5	886889876
157	293	5	874813703
157	298	4	886889876
157	407	4	886891218
157	740	2	886889876
157	1283	2	886891173
157	1302	5	874813703
158	1	4	880132443
158	38	4	880134607
158	79	4	880134332
158	85	4	880135118
158	190	5	880134332
158	271	4	880132232
158	414	4	880135118
158	483	5	880133225
158	568	4	880134532
158	1011	4	880132579
159	225	4	880557347
159	237	3	880485766
159	258	4	893255836
159	451	5	884360502
159	546	4	880557621
159	831	2	880557604
159	871	4	880557003
159	877	3	893255740
159	930	4	880557824
159	1002	3	884027027
160	3	3	876770124
160	21	1	876769480
160	79	4	876859413
160	93	5	876767572
160	124	4	876767360
160	126	3	876769148
160	175	4	876860808
160	187	5	876770168
160	432	3	876861185
160	1019	5	876857977
161	56	3	891171257
161	127	3	891171698
161	187	3	891170998
161	213	2	891171887
161	215	2	891170866
161	274	2	891172070
161	286	2	891169991
161	523	3	891170686
161	654	3	891171357
161	1266	2	891170745
162	42	3	877636675
162	50	5	877635662
162	117	4	877635869
162	151	3	877636191
162	174	4	877636772
162	254	3	877636476
162	544	4	877636167
162	597	4	877636370
162	628	4	877635897
162	710	4	877636860
163	28	3	891220019
163	258	4	891219977
163	269	3	891219977
163	272	4	891219977
163	300	3	891219977
163	301	3	891219977
163	305	2	891219977
163	357	4	891220097
163	433	1	891220137
163	879	2	891219643
164	118	5	889401852
164	125	5	889402071
164	148	5	889402203
164	245	5	889401362
164	300	5	889401221
164	313	5	889401284
164	322	4	889401432
164	331	5	889401193
164	926	2	889402091
164	984	4	889401456
165	15	5	879525799
165	91	4	879525756
165	169	5	879525832
165	176	4	879526007
165	222	5	879525987
165	260	3	879525673
165	270	4	879525672
165	318	5	879525961
165	332	4	879525672
165	500	3	879525832
166	243	3	886397827
166	286	1	886397562
166	294	3	886397596
166	313	5	886397478
166	315	3	886397478
166	347	5	886397562
166	687	1	886397777
166	688	3	886397855
166	751	4	886397665
166	984	5	886397802
167	126	3	892738141
167	133	5	892738453
167	136	4	892738418
167	169	1	892738419
167	222	4	892737995
167	698	4	892738307
167	733	2	892738453
167	1126	5	892738418
167	1147	4	892738384
167	1309	1	892738341
168	7	1	884287559
168	25	5	884287885
168	123	3	884287822
168	258	4	884286863
168	409	4	884287846
168	411	1	884288222
168	472	3	884287927
168	748	2	884287031
168	988	2	884287145
168	1016	5	884287615
169	127	4	891359354
169	211	5	891359200
169	213	5	891359354
169	234	4	891359418
169	483	3	891359200
169	495	3	891359276
169	498	3	891359170
169	604	4	891359317
169	684	5	891359354
169	705	5	891359354
170	258	3	884104016
170	259	3	886623680
170	304	4	887646133
170	322	5	884103801
170	323	3	884293671
170	348	3	887646014
170	678	4	886623680
170	687	3	884706063
170	876	3	886190449
170	988	3	884706063
171	258	4	891034801
171	303	4	891034801
171	305	2	891034606
171	315	4	891034835
171	340	3	891034756
171	346	4	891034835
171	354	3	891034606
171	690	3	891034756
171	887	4	891034835
171	906	3	891034684
172	178	3	875538027
172	183	5	875538864
172	430	3	875537964
172	483	3	875538028
172	514	3	875537964
172	582	4	875538864
172	606	3	875537964
172	612	3	875537964
172	1134	2	875536721
172	1172	3	875538864
173	268	4	877556626
173	269	4	877556626
173	292	5	877557369
173	321	4	877556864
173	331	4	877557028
173	678	3	877556988
173	874	4	877556926
173	879	5	877557076
173	880	4	877557168
173	1265	3	877557239
174	41	1	886515063
174	82	1	886515472
174	94	2	886515062
174	107	5	886434361
174	396	1	886515104
174	458	4	886433862
174	699	5	886514220
174	823	4	886434376
174	902	3	890168363
174	1014	3	890664424
175	9	4	877108146
175	64	5	877107552
175	100	2	877107712
175	132	3	877107712
175	193	4	877108098
175	215	5	877107500
175	234	5	877108015
175	496	5	877108098
175	660	3	877107836
175	661	4	877107432
176	13	4	886047994
176	50	5	886047879
176	100	5	886047918
176	236	4	886048145
176	240	4	886048230
176	250	4	886047963
176	270	4	886047069
176	750	4	886047176
176	948	4	886047595
176	1012	4	886048145
177	1	3	880130699
177	87	4	880130931
177	89	5	880131088
177	124	3	880130881
177	182	5	880130684
177	271	2	882141868
177	300	2	880130434
177	651	3	880130862
177	919	4	880130736
177	1039	3	880130807
178	73	5	882827985
178	106	2	882824983
178	148	4	882824325
178	209	4	882826944
178	218	3	882827776
178	234	4	882826783
178	255	4	882824001
178	276	3	882823978
178	282	3	882823978
178	678	3	882823530
179	269	3	892151064
179	272	5	892151202
179	301	4	892151565
179	303	1	892151270
179	310	4	892151365
179	331	2	892151331
179	346	3	892151489
179	750	1	892151270
179	893	2	892151565
179	1316	3	892151489
180	56	5	877127130
180	69	4	877355568
180	83	5	877128388
180	111	5	877127747
180	121	5	877127830
180	213	5	877128388
180	216	5	877128388
180	421	5	877128388
180	631	5	877544373
180	716	1	877128119
181	121	4	878962623
181	405	4	878962919
181	696	2	878962997
181	741	1	878962918
181	762	2	878963418
181	870	2	878962623
181	927	1	878962675
181	1015	1	878963121
181	1060	1	878962675
181	1288	1	878962349
182	111	4	885613238
182	123	4	885612994
182	126	5	885613153
182	191	4	876435434
182	203	3	876436556
182	222	3	885613180
182	257	3	885613117
182	283	2	885613153
182	471	4	885613216
182	479	5	876436556
183	54	2	891467546
183	159	4	892323452
183	203	3	891466266
183	222	4	892323453
183	227	4	891463592
183	265	2	891466350
183	273	4	892323452
183	331	3	892322382
183	450	3	891463592
183	485	5	892323452
184	36	3	889910195
184	71	4	889911552
184	86	5	889908694
184	100	5	889907652
184	155	3	889912656
184	161	2	889909640
184	181	4	889907426
184	207	4	889908903
184	514	5	889908497
184	660	3	889909962
185	28	5	883524428
185	86	5	883524428
185	196	4	883524172
185	197	5	883524428
185	223	4	883524249
185	279	4	883525255
185	285	5	883524507
185	318	4	883524172
185	638	4	883524364
185	939	3	883524249
186	53	1	879023882
186	322	5	879022927
186	333	3	891718820
186	406	1	879023272
186	550	4	879023985
186	591	4	879023073
186	742	3	879023073
186	770	2	879023819
186	925	5	879023152
186	977	3	879023273
187	86	4	879465478
187	175	2	879465241
187	191	5	879465566
187	196	4	879465507
187	275	5	879465937
187	522	3	879465125
187	582	1	879465683
187	659	5	879465274
187	747	4	879465882
187	792	5	879465340
188	7	5	875073477
188	69	4	875072009
188	159	3	875074589
188	204	4	875073478
188	211	4	875075062
188	234	4	875073048
188	357	4	875073647
188	554	2	875074891
188	628	5	875074200
188	792	2	875075062
189	1	5	893264174
189	30	4	893266205
189	45	3	893265657
189	91	3	893265684
189	120	1	893264954
189	203	3	893265921
189	253	4	893264150
189	276	3	893264300
189	462	5	893265741
189	1115	4	893264270
190	118	3	891033906
190	222	4	891033676
190	269	4	891033606
190	291	3	891042883
190	294	3	891033370
190	300	4	891033606
190	363	2	891626023
190	405	4	891626000
190	628	4	891042883
190	748	3	891033388
191	86	5	891562417
191	269	3	891562090
191	270	3	891560253
191	272	4	891560631
191	300	4	891560842
191	328	3	891562090
191	332	2	891562090
191	343	3	891561856
191	891	3	891560481
191	900	4	891560481
192	50	4	881367505
192	108	4	881368339
192	121	2	881368127
192	235	3	881368090
192	257	4	881367592
192	258	5	881366456
192	276	2	881367505
192	277	3	881367932
192	284	5	881367987
192	1137	4	881367705
193	195	1	889124507
193	328	3	889122993
193	332	3	889123257
193	368	1	889127860
193	393	4	889126808
193	554	3	889126088
193	682	1	889123377
193	693	4	889124374
193	827	2	890859916
193	1132	3	889127660
194	23	4	879522819
194	77	3	879527421
194	152	3	879549996
194	160	2	879551380
194	187	4	879520813
194	191	4	879521856
194	212	1	879524216
194	239	3	879522917
194	478	3	879521329
194	647	4	879521531
195	14	4	890985390
195	100	5	875771440
195	181	5	875771440
195	186	3	888737240
195	227	3	888737346
195	407	2	877835302
195	477	2	885110922
195	591	4	892281779
195	887	4	886782489
195	1084	4	888737345
196	8	5	881251753
196	25	4	881251955
196	66	3	881251911
196	70	3	881251842
196	94	3	881252172
196	286	5	881250949
196	428	4	881251702
196	580	2	881252056
196	692	5	881252017
196	1118	4	881252128
197	176	5	891409798
197	231	3	891410124
197	288	3	891409387
197	294	4	891409290
197	431	3	891409935
197	449	5	891410124
197	518	1	891409982
197	570	4	891410124
197	770	3	891410082
197	849	3	891410124
198	24	2	884205385
198	180	3	884207298
198	214	4	884208273
198	385	3	884208778
198	427	4	884207009
198	549	3	884208518
198	640	3	884208651
198	651	4	884207424
198	1117	3	884205252
198	1169	4	884208834
199	111	3	883783042
199	117	3	883782879
199	259	1	883782583
199	276	4	883782879
199	285	4	883782879
199	286	5	883782485
199	405	2	883783005
199	475	5	883782918
199	687	1	883782655
199	948	1	883782655
200	24	2	884127370
200	72	4	884129542
200	227	5	884129006
200	241	4	884129782
200	265	5	884128372
200	291	3	891825292
200	402	4	884129029
200	409	2	884127431
200	586	4	884130391
200	665	4	884130621
[truncated: 7,430 more rows]
