# Supplementary material
Source: ML conference proceedings conference paper supplement (https://proceedings.neurips.cc/paper_files/paper/2022/hash/01ecd39ca49ddecc5729ca996304781b-Abstract.html)
Supplement: Supplementary file 1 [file 01ecd39ca49ddecc5729ca996304781b-Supplemental-Conference.zip › supplementary NEURIPS 2022/CODE_supplementary/README.md]

This repository is the official implementation of the paper:

'Conditional Meta-Learning of Linear Representations'

The scripts are organized in the following folders/files.
1) 'data' folder: it contains the Lenk, Movies and Jester datasets we used for our real experiments.
2) 'saved_results': it contains the results we got.
3) 'src' folder: it contains the following files.
    A) 'data_management.py': it generates the data for the different experimental settings.
    B) 'general_functions.py': it contains the basic functions used (such as loss, loss subgradient, feature map, etc.).
    C) 'inner_algorithm.py': it contains the implementation of the online inner algorithm (online variant).
    D) 'methods.py': it contains the implementation of the inner algorithm with a fixed linear representation (constant
       conditioning function), the implementation of the unconditional meta-learning approach and the implementation of
       the conditional meta-learning approach.
4) 'post_processing.py': it allows to plot the results memorized in 'saved_results' folder.
5) 'main_script.py': it allows to run the methods on the different experimental settings.
